# Supplementary material for: Gene Structure Evolution of the Short-Chain Dehydrogenase/Reductase (SDR) Family
Source: MDPI journal article supplement (doi:10.3390/genes14010110), 2022-12-30
Supplement: s1 [file s1]

## STRUCTURE AND CATALYSIS CONSENSUSES OF THE HUMAN SDR FAMILY VARIANTS.

The variants of the human SDR family have two highly conserved consensus: the structure and the catalysis consensus (Kallberg et al. 2002 [1]). The structure consensus is responsible for the formation of the important fold (the Rossmann fold) of the SDR polypeptides leading to the tertiary structure of SDR enzymes. It participates to the formation of the enzyme active site as well as the coenzyme and the substrate binding sites. The catalytic consensus includes the amino acids directly involved in the intimate reaction catalytic mechanism of the SDR enzymes (Kallberg et al. 2002).

Two types of structure consensus are present in human SDR enzymes: TGxxxGxG and TGxxGxxG (Kallberg et al. 2002). We analyzed all the human SDR variants and found that structure consensus TGxxxGxG (consensus 1) is present in 54 human SDR variants (Online Resources 1, Table S1) and structure TGxxGxxG (consensus 2) in 21 human SDR variants (Online Resources 1, Table S2).

Variants of the SDR7C, SDR9C, SDR12C, SDE16C, SDR21C, SDR26C, SDR28C and SDR32C families have structure consensus 1, and variants of SDR10E, SDR11E and SDR42E2 families have structure consensus 2.

The conserved first glycine (G) of consensus 1 is substituted with alanine (A) in four variants (SDR15C1, SDR25C2 and SDR27X1) and with aspartic acid (D) in SDR32C2 variant (Gabrielli & Tofanelli, 2012 [35]; Online Resources 1, Table S1). The conserved last glycine of consensus 2 is substituted with alanine in SDR2E1 variant (Online Resources 1, Table S2).

The catalysis consensus (YxxxK), which is highly conserved in human, in SDR12C3 variant has the canonical tyrosine (T) substituted with phenylalanine (F). The tyrosine substitution makes the human SDR12C3 enzyme almost inactive as oxido-reductase enzyme, however the substitution is conserved among some vertebrate species (Meier et al. 2009 [36]; Online Resources 2, Fig. S17, Table S19), suggesting that, in different species, the SDR12C3 enzyme may have different molecular functions (Meier et al. 2009). Very long human variants SDR27X1 do not have the typical SDR catalytic consensus: we found only a single sequence, KAAAY, in which the sequence position of Y and K are inverted with respect to the conserved catalysis consensus. We also could not find the catalysis consensus in SDR17C1, SDR18C1, SDR39U1, SDR43U1 and SDR48A1 variants.

1. Kallberg, Y., Oppermann, U., Jörnvall, H., Persson, B., 2002. Short-chain dehydrogenases/reductases (SDRs). Coenzyme-based functional assignments in completed genomes. *Eur. J. Biochem.* 269, 4409-4417.

35. Gabrielli F., Tofanelli S., 2012. Molecular and functional evolution of human DHRS2 and DHRS4 duplicated genes. *Gene* 511, 461-9.

36. Meier, M., Tokarz, J., Haller, F., Mindnich, R., Adamski J., 2009. Human and zebrafish hydroxysteroid dehydrogenase like 1 (HSDL1) proteins are inactive enzymes but conserved among species. *Chem. Biol. Interact.* 178, 197–205.

| Enzymes | Structure consensus 1 | Catalysis consensus |
|---------|-----------------------|---------------------|
| SDR5C1  | LVAVITGGASGLG         | YSASK               |
| SDR7C1  | VVVVTGANTGIG          | YCHSL               |
| SDR7C2  | VVVTGANTGIG           | YCHSL               |
| SDR7C3  | VIVTGANTGIG           | YCQSK               |
| SDR7C4  | VLITGANSGLG           | YSRSK               |
| SDR7C5  | AVVTGANSIG            | YADTK               |
| SDR8C1  | LGDFKGVG              | YSAAK               |
| SDR9C1  | AVLVTCDSGFG           | YCITK               |
| SDR9C2  | AVLVTTGDCGLG          | YGSSK               |
| SDR9C3  | AVLITCDSGFG           | YGTSK               |
| SDR9C4  | IFITCDSGFG            | YTPSK               |
| SDR9C5  | AFVFTCDSGFG           | YCVSK               |
| SDR9C6  | VFITCDSGFG            | YCVSK               |
| SDR9C7  | VFITCDSGFG            | YCVSK               |
| SDR9C8  | VFITCDSGFG            | YCISK               |
| SDR12C1 | AVVTGSTDGIG           | YSATK               |
| SDR12C2 | AVITGAGDGIG           | YSASK               |
| SDR12C3 | AVVSGATDGIG           | FSASK               |
| SDR13C1 | VFTGASRGIG            | YTIK                |
| SDR15C1 | VIIITAAAQIG           | YSTTK               |
| SDR16C1 | VLTGGRGIG             | YCTSK               |
| SDR16C2 | IVLITGAGHGIG          | YCSSK               |
| SDR16C3 | IVLITGAGHGIG          | YCSSK               |
| SDR16C4 | LITGAGSGLG            | YCASK               |
| SDR16C5 | IVLITGAGSGLG          | YCASK               |
| SDR17C1 | VAFITGGSGIG           | N.F.                |
| SDR18C1 | VAFITGGTGLG           | N.F.                |
| SDR19C1 | VVTGASRGIG            | YGVGK               |
| SDR20C1 | VLVTGAGKGIG           | YCSTK               |
| SDR21C1 | VALVTGNGKIG           | YGVTK               |
| SDR21C2 | VALVTGANRGIG          | YGVSK               |
| SDR24C1 | LALVTGASGIG           | YSATK               |
| SDR25C1 | VAVVTGSTSGIG          | YNVSK               |
| SDR25C2 | VALVTSTDGIG           | YNVSK               |
| SDR25C3 | VALVTSTDGIG           | YNVSK               |
| SDR26C1 | VIVTGASKGIG           | YSASK               |
| SDR26C2 | VLLTGANAGVG           | YSAAK               |
| SDR27X1 | LLARALGLG             | KAAAY               |
| SDR28C1 | VVLITGCSSGIG          | YCASK               |
| SDR28C2 | VLTSGCSSGIG           | YAASK               |
| SDR29C1 | VAIVTGATGIG           | YNLTK               |
| SDR30C1 | ALALVTGAGSGIG         | YAASK               |
| SDR32C1 | AVVVTGATSGLG          | YAASK               |
| SDR32C2 | VVVTDAISGLG           | YAASK               |
| SDR34C1 | VTGASSGIG             | YCASK               |
| SDR35C1 | VVVTGGSSGIG           | YSASK               |
| SDR36C1 | VALVTGAAQIG           | YCASK               |
| SDR37C1 | VVLITGASSGIG          | YSSSK               |
| SDR38C1 | AVCLLTGASRGFG         | YCAGK               |
| SDR40C1 | VFLVTGNSGIG           | YAQNK               |
| SDR41C1 | VVVVTGANSIG           | YNRSK               |
| SDR45C1 | VCAVFGSGRGIG          | YSASK               |
| SDR46C1 | VAIVTGGTDGIG          | YAQSK               |
| SDR47C1 | VVVVTGGRGIG           | YVATK               |

Table S1. Structure and catalysis consensuses of the human SDR enzymes belonging to the Classical SDR families. Structure consensus 1 has the typical structure GxxxGxG. Atypical amino acid and hydrophobic amino acid are highlighted in turquoise and yellow respectively. Conserved amino acids symbols of the structure and of the catalysis consensuses are written in red. N.F., not found.

| Enzymes | Structure<br>consensus 2 | Catalysis<br>consensus |
|---------|--------------------------|------------------------|
| SDR1E1  | VLVTGGAGYIG              | YGKSK                  |
| SDR2E1  | VLVTGGAGFIA              | YASSK                  |
| SDR3E1  | VALITGITGQDG             | YGAAK                  |
| SDR4E1  | ILVTGGSGLVG              | YSYAK                  |
| SDR6E1  | ILITGGAGFVG              | YDEGK                  |
| SDR10E1 | VLLTGATGFLG              | YIYTK                  |
| SDR10E2 | SILITGATGFLG             | YTYTK                  |
| SDR11E1 | LVTGAGGFLG               | YPHSK                  |
| SDR11E2 | LVTGAGGLLG               | YPYSK                  |
| SDR11E3 | LVTGGCGFLG               | YPCSK                  |
| SDR14E1 | VLITGALGQLG              | YGVSK                  |
| SDR22E1 | VFGATGFLG                | YLRNK                  |
| SDR23E1 | VLVTGATGLLG              | YGKTK                  |
| SDR31E1 | VIGSGFLG                 | YTETK                  |
| SDR33C1 | VLVYGGRGALG              | YGMAK                  |
| SDR39U1 | VLVGGTGFIG               | N.F.                   |
| SDR42E1 | VLITGGSGYFG              | YSRTK                  |
| SDR42E2 | VLVTGGGGYLG              | YSRTK                  |
| SDR43U1 | IAIFGATGQTG              | N.F.                   |
| SDR44U1 | VFILGASGETG              | YLQVK                  |
| SDR48A1 | LVVVFGGTGAQG             | N.F.                   |

Table S2. Structure and catalysis consensuses of the human SDR enzymes belonging to the Extended, Atypical and Unknown SDR families. Structure consensus 2 has the typical structure GxxGxxG. Atypical and hydrophobic amino acid are highlighted in turquoise and yellow respectively. N.F., not found. For further details see Fig. S50.
