# Supplementary material for: Gene Structure Evolution of the Short-Chain Dehydrogenase/Reductase (SDR) Family
Source: MDPI journal article supplement (doi:10.3390/genes14010110), 2022-12-30
Supplement: s1 [file s1]

## INVERTEBRATE ORTHOLOGS OF THE HUMAN SDR FAMILY VARIANTS

|          |                 |                                                                           |      |      |
|----------|-----------------|---------------------------------------------------------------------------|------|------|
| SDR7C1   | H. sapiens      | -----MV-EL--MFPLL--L                                                      |      |      |
| SDR7C2   | H. sapiens      | -----MLVTLGLL                                                             |      |      |
| SDR7C3   | H. sapiens      | -----MSRYLLP                                                              |      |      |
| SDR7C4   | H. sapiens      | -----MAVATA-----AAVL-A---ALGGALW                                          |      |      |
| SDR7C5   | H. sapiens      | -----ME-----ALLLGAGLL                                                     |      |      |
| SDR40C1  | H. sapiens      | -----MSLYRSVVW                                                            |      |      |
| SDR7-1C1 | C. intestinalis | MSTFVANPPSSHIFESLVPYYAEALLGAQNN---NTAGE---EISHPNG--HSVTNGVW               |      |      |
| SDR7-1C2 | C. intestinalis | -----                                                                     |      |      |
| SDR7-3C2 | C. intestinalis | -----MSIYQKTAF                                                            |      |      |
| SDR7-3C3 | C. intestinalis | -----MSRFRVIVW                                                            |      |      |
| SDR7-3C4 | C. intestinalis | -----MQARYRL                                                              |      |      |
| SDR7-1C1 | S. purpuratus   | -----                                                                     |      |      |
| SDR7-1C3 | S. purpuratus   | -----MDIVNRI--FHPRYTLP                                                    |      |      |
| SDR7-2C2 | S. purpuratus   | -----MISLSTLS-----LERVPDFGQRGPGDLEW                                       |      |      |
| SDR7-1C3 | M. domestica    | -----MEGLFSF--LRSRPVFW                                                    |      |      |
| SDR7-1C1 | B. malayi       | -----MIEFSESSMTSDE-----GY--FG-----SLS                                     |      |      |
| SDR7-1C2 | A. californica  | -----MRPEQHAKM--AA-EMKQRLKVEELENIDELEDV--VEDVFPI--LIL--TVF                |      |      |
| SDR7-1C3 | A. californica  | -----MTLQEYSLPVSVVGTVALAVFFnf--LDF---V                                    | 1p.1 |      |
| x x x    |                 |                                                                           |      |      |
| SDR7C1   | H. sapiens      | LLLPFL-LY-MAAPQIr <sup>k</sup> MLSSGVCTSTVQLPGKVVVVTGANTGIGKETAKELAQrgARV | 1p.1 | 2p.2 |
| SDR7C2   | H. sapiens      | TSFFSF-LY-MVAPSIr <sup>k</sup> FFAGGVCRTNVQLPGKVVVITGANTGIGKETARELASrgARV | 1p.1 | 2p.2 |
| SDR7C3   | H. sapiens      | LSALGT-VA-GAVALLkdYVTGGACPSKATIPGKTVIVTGANTGIGKQTALELARrgGNI              | 1p.1 | 2p.2 |
| SDR7C4   | H. sapiens      | LAARRF-----VGPRVQRLRRG---GDPGLMHGKTVLITGANSGLGRATAAELLRLGARV              |      |      |
| SDR7C5   | H. sapiens      | LG-----AYVLVYYNLVKAPPCGGMGNLGRGTAVVtgANSGIGKMTALELARRGARV                 |      | 1p.2 |
| SDR40C1  | H. sapiens      | FAKGLR--EYTksGYESACKDFVPHDLEVQIPGRVFLVTGGNSGIGKATALEIAKrgGTV              | 1p.1 | 2p.2 |
| SDR7-1C1 | C. intestinalis | VLLVGTLLW--SYILLVILAKKPKCDCTARLDGKTVVItgatDGVGKATAFELASRGAEI              |      | 1p.2 |
| SDR7-1C2 | C. intestinalis | -----MKSVRNGWVRSDISMVGKNIITGANAGIGFITTRDLVKRGGRV                          |      |      |
| SDR7-3C2 | C. intestinalis | FIKGR--QFTngGYAKAAKSFHPEDTKKDVSDQVFMVTGANSGLGKAAAIAIAKNGGEV               | 1p.1 |      |
| SDR7-3C3 | C. intestinalis | SSLICA---VAYLWIVFIKRGPICVSNKRLDGKTVLItggNTGVGEATVFEVAKLGARI               |      | 1p.2 |
| SDR7-3C4 | C. intestinalis | SGFVGS-LS-----KMVKSARGSWVRSDVKMTGKTVVITGANTGIGLETAIDLVKREARV              |      |      |
| SDR7-1C1 | S. purpuratus   | -----MDGKTVIITGCNTGIGKETAKDLAKrgARV                                       |      | 1p.2 |
| SDR7-1C3 | S. purpuratus   | FTTFGA-LV-GGTLLLkdYGGDKCPCSTARVDGKTVIITGANSGIGKETALELAKrgGKI              | 1p.1 | 2p.2 |
| SDR7-2C2 | S. purpuratus   | TTIALMMVVLVGLYYYYVVKVADRCSCKPRLDGKTVIVtgANTGIGKETARDLARRGARV              |      | 1p.2 |
| SDR7-1C3 | M. domestica    | TSVAGT-TVGVAC-FVkdMMQGGKFTKPTRADGKVIIVTGSNTGIGKETVRELAKRGATV              | 1p.1 |      |
| SDR7-1C1 | B. malayi       | VPLFGV-LTCAGIYf <sup>l</sup> rRYLKGAQFNEYVEAGGKIALVTGASAGIGKQTALENLRGATV  | 1p.2 |      |
| SDR7-1C2 | A. californica  | VAVLLL-IIIFLIRLYLR---WFAPNPSKNRMDGKTVLItgGTSGIGKCTAIELAKRNARV             |      | 1p.2 |
| SDR7-1C3 | A. californica  | IGLLLI-LVPVSCILLKEYMSGGRYYGKERIDGKTVVITGANCGIGKETARDLAGrgGRI              |      | 2p.2 |
| ** * *   |                 |                                                                           |      |      |
| SDR7C1   | H. sapiens      | YLACRDVEKGELVAKEIQTT-----TGNQQVLVRKLDLSDTKSIRAFAGFL                       |      |      |
| SDR7C2   | H. sapiens      | YIACRDVLKGESAASEIRVD-----TKNSQVLVRKLDLSDTKSIRAFAGFL                       |      |      |
| SDR7C3   | H. sapiens      | ILACRDMEKCEAAAKDIRGE-----TLNHHVNARHLDLASLKSIREFAAKI I                     |      |      |
| SDR7C4   | H. sapiens      | IMGCRDRARAEAAAGQLRRELRLQAACGPEPGVSGVGELIVRELDLASLRSVRAFCQEML              |      |      |
| SDR7C5   | H. sapiens      | VLAQRSQERGEAAAFDLr <sup>q</sup> e-----SGNNEVIFMALDLASLASVRAFAFAL          | 2p.0 |      |
| SDR40C1  | H. sapiens      | HLVCRDQAPAEARGEIIRE-----SGNqnIFLHIVDLSDPKQIWKFVENFK                       |      | 3p.0 |
| SDR7-1C1 | C. intestinalis | VIPCRNAEkgrrVAREIADI-----TGNHKKIQVVYVDFTNLESVKVCTQILK                     | 2p.2 |      |
| SDR7-1C2 | C. intestinalis | ILACRNMEALAAKDt <sup>i</sup> IKETG-----KEEKYVVVKKLDLSSLQSIRDFAHNIN        | 1p.0 |      |
| SDR7-3C2 | C. intestinalis | HMVCRNLERANQAKEDIVKE-----SGSnITVHVLDISNTKEVVEFAKNFS                       |      | 2p.0 |
| SDR7-3C3 | C. intestinalis | VIASRNKTKSEVDKIRVKA-----TGNQniRVMELDLGDSDSVRKFKVKNFN                      | 2p.0 |      |
| SDR7-3C4 | C. intestinalis | ILGCRNMEKAEAAKQr <sup>i</sup> FKEAG-----GKDDTVVIKQLDLSSLASVRAFAKDIN       | 1p.0 |      |
| SDR7-1C1 | S. purpuratus   | IMACRNVEKAKEAQLDVIKE-----SGSSNVVVKKLDLASMKSIREFVEELK                      |      |      |
| SDR7-1C3 | S. purpuratus   | ILACRDIKAEKAREEIVAA-----SGNTDVKVLQLDLASLSSIRQFADKIS                       |      |      |
| SDR7-2C2 | S. purpuratus   | ILACRDVVRGREAEDIRMS-----TGNDVVI FMKLNLSAFDSIRHFAQEFN                      |      |      |
| SDR7-1C3 | M. domestica    | YMACRDMKKCEeaREEIVLE-----TKNKVYVCRECDLASLESIRQFAEafK                      | 2p.0 | 3p.1 |

|                   |                 |                                                                                                               |      |           |
|-------------------|-----------------|---------------------------------------------------------------------------------------------------------------|------|-----------|
| SDR7-1C1          | B. malayi       | YMLCRDRAKSENARIELT <del>kl</del> -G-----CNPTRLILKDVLDLASFATIRKFADEIR                                          | 2p.0 |           |
| SDR7-1C2          | A. californica  | LIAGREKAKVEAVARNI <del>rk</del> K-----TGNQHVNALVLDLGNLRSIQEFAEDFR                                             | 2p.1 |           |
| SDR7-1C3          | A. californica  | IMACRDLEKCEQAKKEIVEE-----TGKNNIECQKLDLASFASIRAFKLIN                                                           |      |           |
| *                 |                 |                                                                                                               |      |           |
| SDR7C1            | H. sapiens      | aeEKHLHVLINNAGVMMCPYS-KTAD-GFEMHIGVNHlgHFLLT <del>HLLEKLKE</del> ---SAPS                                      | 3p.2 | 4p.2      |
| SDR7C2            | H. sapiens      | aeEKQLHILINNAGVMMCPYS-KTAD-GFETHLGVNHlgHFLLT <del>YLLERLKV</del> ---SAPA                                      | 3p.2 | 4p.2      |
| SDR7C3            | H. sapiens      | eeEERV <del>VD</del> LINNAGVMRC <del>PHW</del> -TTED-GFEMQFGVNHlgHFLLT <del>NLLD<del>KLKA</del></del> ---SAPS | 3p.2 | 4p.2      |
| SDR7C4            | H. sapiens      | qeEPRLDVLINNAGIFQCPYM-KTED-GFEMQFGVNHlgHFLLT <del>NLLGLLKS</del> ---SAPS                                      | 1p.0 |           |
| SDR7C5            | H. sapiens      | SSEPRLDILIH <del>Na</del> gISSCGR---TRE-AFNLLLRVNHIGPFLT <del>THLLPCLKA</del> ---CAPS                         |      | 3p.2      |
| SDR40C1           | H. sapiens      | QEH-KLHV <del>li</del> nNAGCMVNKRE-LTED-GLEKNFAANTlgVYILT <del>TGLIPVLEK</del> ---EHDP                        | 4p.0 | 5p.2      |
| SDR7-1C1          | C. intestinalis | KSLKKVDILIN <del>Na</del> gIGNVG--TTLD-GFPLVFGVNHAPFLFTTELP <del>L<del>Lrk</del></del> ---APTA                |      | 3p.2 4p.1 |
| SDR7-1C2          | C. intestinalis | QTERRIDVLIN <del>Na</del> gVM <del>LC</del> PET-KTKD-GFESHFGVNHlgHFLLT <del>NLLD<del>Lkh</del></del> ---SAPS  | 2p.2 | 3p.0      |
| SDR7-3C2          | C. intestinalis | SNHEKLNVLVNNAGCMVNDRK-TTEVGNLELN <del>FATNTVGT</del> YVLTQELV <del>PLLLK</del> ---STKP                        |      |           |
| SDR7-3C3          | C. intestinalis | ETEEHLD <del>FLIN</del> agLLGYG--QTKQ-GINKLYAVNHFGPFLT <del>NLLLPKMKEQSKSRPV</del>                            | 3p.2 |           |
| SDR7-3C4          | C. intestinalis | DNESKIDVLLN <del>Na</del> gIMLV <del>PKG</del> -KTED-GFELHYGVNHlgHFLLT <del>NLLD<del>Lkr</del></del> ---SAPS  | 2p.2 | 3p.0      |
| SDR7-1C1          | S. purpuratus   | KEEKSLDVLVNNagVMMCPRW-ETED-GFEMQFGTNHlgHFLLT <del>L<del>LLDLIKA</del></del> ---SAPS                           |      |           |
| SDR7-1C3          | S. purpuratus   | sdEEGVDVLVNNAGLMRC <del>PKW</del> -KTED-GFEMQFGVNHlgHFYLT <del>NLLD<del>KLKA</del></del> ---SAPS              | 3p.2 | 4p.2      |
| SDR7-2C2          | S. purpuratus   | NTEERLDILVNNagVIN <del>DGSL</del> -RTEE-GHELVEFGVNHlgHFLLT <del>NILLD<del>KLQK</del></del> ---CAPS            | 2p.2 |           |
| SDR7-1C3          | M. domestica    | AEQKRLDILINNAGVMRCPRS-LTKE-GFELQIGVNHMGHFLLT <del>NLLD<del>DELkk</del></del> ---SAPS                          |      | 4p.0      |
| SDR7-1C1          | B. malayi       | yeVDKIDILVNNAGIMFY <del>PKFELT</del> ED-GHEMTWQ <del>TNY</del> lgHFLLT <del>TELLPLIKK</del> ---SSNG           | 3p.2 | 4p.2      |
| SDR7-1C2          | A. californica  | KDEKYLHVLINNAym-GPLS-KTDD-GLERSFGVNYLGHFYLT <del>YLLSD<del>kl</del></del> KK--NAPS                            | 3p.2 | 4p.2      |
| SDR7-1C3          | A. californica  | stESHVDILINNAGVMMCPKM-LTED-GLEMQIGVNHfgHFLLT <del>QLLMD<del>KLKA</del></del> ---SAPS                          | 3p.2 | 4p.2      |
| *   *   *   *   * |                 |                                                                                                               |      |           |
| +   +             |                 |                                                                                                               |      |           |
| SDR7C1            | H. sapiens      | RIVNVSSLAHHLGR--IHFNHLQGE--KFY-NAGLAYCHSKLANILFTQELARRLkgSGV                                                  | 5p.2 |           |
| SDR7C2            | H. sapiens      | RVNVNSSVAHHIGK--IPFHD <del>LQSE</del> --KRY-SRGFAYCHSKLANVLF <del>TRELAKRL</del> qgTGV                        | 5p.2 |           |
| SDR7C3            | H. sapiens      | RIINLSSLAHVAGH--IDFDDLNWQT-RKY-NTKAA <del>Y</del> CQSKLAIVLFT <del>KELSRRL</del> qgSGV                        | 5p.2 |           |
| SDR7C4            | H. sapiens      | RIVVVSSKLYKYGD--INFDDLNSE--QSY-NKSF <del>CYS</del> RSKLANILFT <del>TRELARR</del> LEG <del>TNV</del>           |      |           |
| SDR7C5            | H. sapiens      | RVVVVASAAHCRGR--LDFKRLDRPV-VGWRQELRAYADTKLANVLFARELANQLEATGV                                                  |      |           |
| SDR40C1           | H. sapiens      | RviTVSSGGMLVQK--LNTNDLQSE--RTPFDGTMVYAQN <del>kr</del> QQVVLTERWAQGH <del>P</del> --AI                        | 6p.0 | 7p.0      |
| SDR7-1C1          | C. intestinalis | RIVCVSSVTHLWGN--INFDELQDLGGSLPSQF <del>RAYSR</del> SKLANVLF <del>FAQLHRN</del> ESQHGI                         |      |           |
| SDR7-1C2          | C. intestinalis | RVVIVASEAHRIGKTYTQWSDMNSG--EGM-D---TYCRSKLMN <del>ILFA</del> RELSDRLkgSGV                                     |      | 4p.2      |
| SDR7-3C2          | C. intestinalis | RviTVSSGGMYTQK--LNVKDLQSE--KGTFGSDMAYAQK <del>RQ</del> qviL <del>TEE</del> WAKMHP--DI                         | 3p.0 |           |
| SDR7-3C3          | C. intestinalis | RIINLSSSAH <del>ra</del> SP--LD <del>FSKI</del> YEPA-EGVLENFRVYSNTKLAT <del>IYFTTE</del> LLKRIEGFDI           | 4p.0 |           |
| SDR7-3C4          | C. intestinalis | RIVTVSSEAHRLGTPKIDFKDMNFD--NNY-DES <del>VAYGR</del> SKLMN <del>ILFT</del> KELSKR <del>Leg</del> TNV           |      | 4p.2      |
| SDR7-1C1          | S. purpuratus   | RIVNVSSLAHQFGK--INFDDIMSK--EKY-SDMDAYGQSKLANVLF <del>TRELATRL</del> kgSGV                                     |      | 3p.2      |
| SDR7-1C3          | S. purpuratus   | RIINVSSVAHQVGK--INFEDINSD--QRY-NSAEAYANSKLAKVLF <del>TRELSKR</del> LegTGV                                     |      | 5p.2      |
| SDR7-2C2          | S. purpuratus   | RVINVSSDAYMFGK--LDLERLSVN----D-GRVKS <del>YAR</del> SKLANVLF <del>TROLAD</del> KMAGTGV                        |      |           |
| SDR7-1C3          | M. domestica    | RIVVLSSMAHTRGE--INVGD <del>LNSE</del> --KSY-DEGKAYNQSKLANIL <del>TRELARR</del> LegTGV                         |      | 5p.2      |
| SDR7-1C1          | B. malayi       | RIINVSSSLHKTADS-V <del>DS</del> IVNN--KKYFSK <del>SM</del> PYSRSKLAqvMHVREL <del>TRRLR</del> TKDP             | 5p.0 |           |
| SDR7-1C2          | A. californica  | RIINVVSDSYKQGE--LDLDDLAMN--KGY-SVYSAY <del>TRSKLAQ</del> VMFNLECHKRYIGNCV                                     |      |           |
| SDR7-1C3          | A. californica  | RIIFVSSLGHTLGK--MNFEDLNSE--KSY-SKL <del>NAYQ</del> SKLANILCSREMA <del>RR</del> LegTGV                         | 5p.2 |           |
| *   *   *   *     |                 |                                                                                                               |      |           |
| SDR7C1            | H. sapiens      | ----TYSVHPGTVQSELV-RHSSF-----MRMMWWLFSFFIKTPQQGAQTSLHC                                                        |      |           |
| SDR7C2            | H. sapiens      | ----TTYAVHPGVVRSELV-RHSSL-----LCLLWLRFSPFVK <del>TAREGA</del> QTSLHC                                          |      |           |
| SDR7C3            | H. sapiens      | ----TVNALHPGVARTELG-RHTGIHGSTF----SSTTlgPIFWLLVKSP <del>E<del>LAAQ</del></del> PSTYL                          |      | 6p.2      |
| SDR7C4            | H. sapiens      | ----TVNVLHPGIVRTNLG-RHIH---PLL----VKPLFNLVSWAFFKTPVEGAQTSIYL                                                  |      |           |
| SDR7C5            | H. sapiens      | ----TCYAAHpgPVNSELFLRHVP <del>GW</del> LRPL-----LRPLAWLVLRAPRGG <del>AQ</del> TPLYC                           | 4p.2 |           |
| SDR40C1           | H. sapiens      | ----HFSMHPGWADTpgVRQAMP <del>GFHAR</del> -----FGDRLRSEAQ <del>GAD</del> TMLWL                                 |      | 8p.2      |
| SDR7-1C1          | C. intestinalis | ----STYIAHpgWTFTAIF-RDSPVLAKL-----LLFP <del>LLY</del> FLYTPAQGAQTQIHL                                         | 5p.2 |           |
| SDR7-1C2          | C. intestinalis | ----TVNSLHPGVIRSGLW-QHLHDELSIWRVWLHKTMNPFMKMF <del>WKS</del> PEYGAQT <del>TIYC</del>                          |      |           |
| SDR7-3C2          | C. intestinalis | ----HFSAMHPGWADTPAVRTSM <del>PGF</del> YFY-----MKDNLRTAE <del>gg</del> ADTIVWL                                |      | 5p.2      |
| SDR7-3C3          | C. intestinalis | ----STYAVHpgYISSELF-ENFPVPFN <del>YI</del> -----GRIPLILF <del>ks</del> TYYG <del>Q</del> TTMYC                | 5p.2 | 6p.1      |
| SDR7-3C4          | C. intestinalis | ----TANCLHPGVIKSELW-RHMDGSRK <del>PVR</del> DFF----VGTFVRWF <del>GK</del> TIHGAQT <del>NIYC</del>             |      |           |

|          |                 |                                                              |      |      |
|----------|-----------------|--------------------------------------------------------------|------|------|
| SDR7-1C1 | S. purpuratus   | ----TSYAVHPGGVDTDLA-RHRDS--YPF----YLRVLLPLMVPFIKTSEEGAQTNIYC |      |      |
| SDR7-1C3 | S. purpuratus   | ----TANVLHPGVVKTNIIG-RHTGMHQSGF----SMAILGPIFWLFRSPQQAQTSVYC  |      |      |
| SDR7-2C2 | S. purpuratus   | ----VSFSLHpgSVNTEIK-RNWAGWLRAL-----APLISFFFLKSVKAGAQTSIHC    | 3p.2 |      |
| SDR7-1C3 | M. domestica    | ----TVNALHPGVVDTELF-RHMGFFNSFF----ASLIFKPLSWPFLKSPKNGAQTTLYA |      |      |
| SDR7-1C1 | B. malayi       | GTTVTINAVHPGVCFTELM-RYTVFSRKY----ILKIIISPLLWFFMKTDkdGAQTTLVY |      | 6p.0 |
| SDR7-1C2 | A. californica  | ----WSFAAHpgPTATDLRLNYPGMWGNA-----LRLVSRIMFKPPEDGCQTLVYL     | 5p.2 |      |
| SDR7-1C3 | A. californica  | ----TVNSLHPGTVSTELT-RHLSFWNSSI----FKVFAGPFQYILLKTPMQGAQTSITL |      |      |
|          |                 | ***                                                          |      |      |
| SDR7C1   | H. sapiens      | ALTEG-LEILSGNHFsdcHVAWVSAQ-----A-RNETIARRLWDVSCDLLGLPID---   | 6p.1 |      |
| SDR7C2   | H. sapiens      | ALAEG-LEPLSGKYFsdcCKRTWVSPR-----A-RNNKTAERLWNVSCCELLGIRWE--- | 6p.1 |      |
| SDR7C3   | H. sapiens      | AVAEELADVSGKYFDGLKQKAPAPE-----A-EDEEVARRLWAESARLVGLEAPSVR    |      |      |
| SDR7C4   | H. sapiens      | ASSPE-VEGVSGRYFGDCKEEELLPK-----A-MDESVARKLWDISEVMVGLLK----   |      |      |
| SDR7C5   | H. sapiens      | ALQEG-IEPLSGRYFANCHVEEVPPA-----A-RDDRAAHLWEASKRLAGLPGGEDA    |      |      |
| SDR40C1  | H. sapiens      | ALSSAAAQPSGRFFqdkRPVSTHLPLATASSSPAEEKLEILEQLAQTFK-----       | 9p.2 |      |
| SDR7-1C1 | C. intestinalis | ALAPG-IESSSGNFYVSCPKPARTGKS-----A-KDIELASNLWSYSEKAVASALNQSV  |      |      |
| SDR7-1C2 | C. intestinalis | SVAPE-LLNVTGKYFsdcCAIAYESGE-----A-KSKRNAVKLWNISCELTGINEFITF  | 5p.1 |      |
| SDR7-3C2 | C. intestinalis | SVSDAALAQPSGLFFldRKAVPTHLALAWTRESAEDRNTFLTIAEIANQFKP-----    | 6p.2 |      |
| SDR7-3C3 | C. intestinalis | MLDDM-VTEFSGHYFASCRKTEPQSF-----A-HNQTAQKLWQLSLEITEFSEQ---    |      |      |
| SDR7-3C4 | C. intestinalis | CMAPE-IEDVTGKYFsdcCAVASENSQ-----A-KKDKNAEQLWQVSLQATGLSEA---  | 5p.1 |      |
| SDR7-1C1 | S. purpuratus   | SVDEK-AGQETGLYYsdcCAVKQAAKQ-----G-RDDEAARKLWDLSLKLVLGLEE---- | 4p.1 |      |
| SDR7-1C3 | S. purpuratus   | AVDPE-LEKVSQYFrdCKKSECDAS-----G-KDDEVAAKLWDVSCQLTGLSSEETK    | 6p.1 |      |
| SDR7-2C2 | S. purpuratus   | AVSDD-ILDQSGEFFKGCQVQKLSRT-----A-QDQDLAQRLWDVSLMTGLQSS---    |      |      |
| SDR7-1C3 | M. domestica    | ALDED-LATVSGKYFSDCNIKDVAPQ-----A-KDDALAKWLWAVSEKWTRLTK---    |      |      |
| SDR7-1C1 | B. malayi       | ALSKN-VEAISGRYFgeCKEHTPSPN-----S-LDDTKCNILYNQSLEAVKLSE----   | 7p.1 |      |
| SDR7-1C2 | A. californica  | AVADG-LREFsgKLFTDCKAVKTNEK-----VKANKELSSRLWNVSAHLCGFEGDALM   | 6p.2 |      |
| SDR7-1C3 | A. californica  | AVDPR-LEKVTGKYFsdcCWEKRTARQ-----A-EDDGAACKLWEISEWTRLKQD---   | 6p.1 |      |
|          |                 | *                                                            |      |      |
| SDR7C1   | H. sapiens      | -----                                                        |      |      |
| SDR7C2   | H. sapiens      | -----                                                        |      |      |
| SDR7C3   | H. sapiens      | EQPLPR-----                                                  |      |      |
| SDR7C4   | H. sapiens      | -----                                                        |      |      |
| SDR7C5   | H. sapiens      | EPDEDPQSEDSEAPSSSLSTPHPEEPTVSQPYSPSQSSPDLSKMTTHRIQAKVEPEIQLS |      |      |
| SDR40C1  | H. sapiens      | -----                                                        |      |      |
| SDR7-1C1 | C. intestinalis | GYCTSI-----                                                  |      |      |
| SDR7-1C2 | C. intestinalis | ----PTHRL-----                                               |      |      |
| SDR7-3C2 | C. intestinalis | -----                                                        |      |      |
| SDR7-3C3 | C. intestinalis | -----                                                        |      |      |
| SDR7-3C4 | C. intestinalis | -----                                                        |      |      |
| SDR7-1C1 | S. purpuratus   | -----                                                        |      |      |
| SDR7-1C3 | S. purpuratus   | EKSAKTHDVVKEAER-----                                         |      |      |
| SDR7-2C2 | S. purpuratus   | -----                                                        |      |      |
| SDR7-1C3 | M. domestica    | -----                                                        |      |      |
| SDR7-1C1 | B. malayi       | -----                                                        |      |      |
| SDR7-1C2 | A. californica  | PEDEPEATPNAAEEAGEATA---EEEEKSQ-----                          |      |      |
| SDR7-1C3 | A. californica  | -----                                                        |      |      |

Figure S25. Alignment of the invertebrate orthologs of the human SDR7C family and of the human SDR40C1 variants. × and + symbols mark the structure consensus and the catalysis consensus respectively; the couples of amino acid symbols in red lowercase mark the splicing-site positions; \* symbol marks the position of identical amino acid residues of the aligned SDR protein sequences. The splicing sites are progressively numbered and the phase (p.) type is indicated after the splicing-site number; the phase symbols, highlighted in a same color, belong to orthologous splicing sites.

|          |                 |                                                            |
|----------|-----------------|------------------------------------------------------------|
| SDR9C1   | H. sapiens      | -----MSTFF--SDTAWICLAVPTVLCGTVFCKYKKSSGQLWSWMVCLAG         |
| SDR9C2   | H. sapiens      | -----ME---RWPWP--SGGAWLLVAARALLQL--LRSDLRLGRPLLAALALLAA    |
| SDR9C3   | H. sapiens      | -----                                                      |
| SDR9C4   | H. sapiens      | -----                                                      |
| SDR9C5   | H. sapiens      | -----                                                      |
| SDR9C6   | H. sapiens      | -----                                                      |
| SDR9C7   | H. sapiens      | -----                                                      |
| SDR9C8   | H. sapiens      | -----                                                      |
| SDR9-1C2 | C. intestinalis | -----MH                                                    |
| SDR9-1C2 | S. purpuratus   | -----                                                      |
| SDR9-1C2 | C. elegans      | -----                                                      |
| SDR9-1C4 | C. elegans      | -----                                                      |
| SDR9-1C2 | A. californica  | MEIDIQNELNRDGIVFYSVLYSSVTVIFAFVLS---KFLTNEFRFGFRSFLSLVTLFL |
| SDR9-1C5 | A. californica  | -----                                                      |

|          |                 |                                                                                                                                                  |           |
|----------|-----------------|--------------------------------------------------------------------------------------------------------------------------------------------------|-----------|
| SDR9C1   | H. sapiens      | GKTLACDRENGA <sup>x</sup> r <sup>x</sup> P-LLGST---SFIPIGRRTYASAAE <sup>x</sup> p <sup>x</sup> VGSKAVLV <sup>x</sup> TGCDS--GF                   | 1p.1 2p.0 |
| SDR9C2   | H. sapiens      | LCAVCLLILSPFWGLILFSVSCFLMY-----TYLSGQELLPVDQKAVLV <sup>x</sup> tg <sup>x</sup> GDC--GL                                                           | 1p.2      |
| SDR9C3   | H. sapiens      | LDWLCQRLPPPAALAVLAAAGWIAL-----SRLARPQRLPVATRAVL <sup>x</sup> tg <sup>x</sup> CDS--GF                                                             | 1p.2      |
| SDR9C4   | H. sapiens      | -----MLFWVL---GLLILC-GFLW--TRKGLKIEDITDKYIFITGCD <sup>x</sup> S--GF                                                                              |           |
| SDR9C5   | H. sapiens      | -----MWLPLLGA-LLW-AVLW--LLRDR-QSLPASNAFVFITGCD <sup>x</sup> S--GF                                                                                |           |
| SDR9C6   | H. sapiens      | -----MWLYLAAFVGLYY-LLHW--YRERQ-VVSHLQDKYVFITGCD <sup>x</sup> S--GF                                                                               |           |
| SDR9C7   | H. sapiens      | -----MAALTDLSF-MYRW--FKNCN-LVGNLSEKYVFITGCD <sup>x</sup> S--GF                                                                                   |           |
| SDR9C8   | H. sapiens      | -----MWLYLAVFVGLYY-LLHW--YRERQ-VLSHLRDKYVFITGCD <sup>x</sup> S--GF                                                                               |           |
| SDR9-1C2 | C. intestinalis | -----MAKSHQKNVVI <sup>x</sup> tg <sup>x</sup> CDIPN <sup>x</sup> S <sup>x</sup>                                                                  | 1p.2      |
| SDR9-1C2 | S. purpuratus   | EAP <sup>x</sup> la <sup>x</sup> KCIMSFLTLVGLTVGVIVAR-MIEY--LIRRP <sup>x</sup> HIDNITK <sup>x</sup> D <sup>x</sup> ky <sup>x</sup> VFITGCDT--GF  | 1p.2 2p.1 |
| SDR9-1C2 | C. elegans      | ---MVVCC <sup>x</sup> CLCTLT <sup>x</sup> FWLYFVAVVVVW <sup>x</sup> NIV <sup>x</sup> ry <sup>x</sup> --ILELIPEGGS <sup>x</sup> LQDRAILITGCDT--GF | 1p.1      |
| SDR9-1C4 | C. elegans      | ----MLSASTIFAWVAIFGSYV-AY <sup>x</sup> kv <sup>x</sup> YNF--LI--KQRVDNYGKK <sup>x</sup> TVAISGCD <sup>x</sup> S--GF                              | 1p.2      |
| SDR9-1C2 | A. californica  | GEPLCQFLVEGPGSLVVFSLGCLIIY-----Y-ILPASHLPIKNRSVL <sup>x</sup> I <sup>x</sup> tg <sup>x</sup> CDS--GF                                             | 1p.2      |
| SDR9-1C5 | A. californica  | -----MWLMIAAIVTGIV-GYLFINRFLRSLDVGDYGNKYVFITGCDT--GF                                                                                             |           |

|          |                 |                                                                                                                      |      |
|----------|-----------------|----------------------------------------------------------------------------------------------------------------------|------|
| SDR9C1   | H. sapiens      | GFSLAKHLHSGKGLVFAGCLM <sup>x</sup> kd <sup>x</sup> KGHDGVKELDSL-NSDRLRTV-QLNVCSS <sup>x</sup> EEVEK <sup>x</sup> VVE | 3p.0 |
| SDR9C2   | H. sapiens      | GHALCKYLDELGFTVFAGVLNENGP--AEELRRTC-SPRLSVL-QMDITKPVQIKDAYS                                                          |      |
| SDR9C3   | H. sapiens      | GKETAKKLDSMGFTVLATVLELNSPG--AIELRTCC-SPRLRL-QLMDITKPGDISRVLE                                                         |      |
| SDR9C4   | H. sapiens      | GNLAARTFDKKG <sup>x</sup> FHVIAACLTESGST-A---LKAET-SERLRTV-LLDVTDPENVKRTAQ                                           |      |
| SDR9C5   | H. sapiens      | GRLLALQLDQGRFVLASCLTPSGAE-D---LQ <sup>x</sup> RVA-SSRLHTT-LLDITDPQSVQQA <sup>x</sup> AK                              |      |
| SDR9C6   | H. sapiens      | GNLLARQLDARGLRVLAACLT <sup>x</sup> EKGAE-Q---LRGQT-SDRLETV-TLDVTKMESIAAATQ                                           |      |
| SDR9C7   | H. sapiens      | GNLLAKQLVDRGMQVLAACFTEEGSQ-K---LQ <sup>x</sup> RD <sup>x</sup> T-SYRLQTT-LLDVTKSES <sup>x</sup> IKAAAQ               |      |
| SDR9C8   | H. sapiens      | GKLLARQLDARGLRVLAACLT <sup>x</sup> EKGAE-Q---LRGQT-SDRLETV-TLDVTKTESVAAAAQ                                           |      |
| SDR9-1C2 | C. intestinalis | GYELALCLDHQGYVVFAGCTDCNSVG--ARSLASRG-STRLAVM-QIDVTKQDEIDDATE                                                         |      |
| SDR9-1C2 | S. purpuratus   | GNKLAKQLDIMGVHVIAGCLTEKGR <sup>x</sup> T-D---LDDVT-SDRVKTL-ILDVTDHESVLRAYE                                           |      |
| SDR9-1C2 | C. elegans      | GRELAKKCAKNGLVFAGCLT <sup>x</sup> Tea <sup>x</sup> AK-T---LESESANPRLRTV-PLDVSKDESVEKTVE                              | 2p.0 |
| SDR9-1C4 | C. elegans      | GRLLAVRLVKQGVPIAGVLK <sup>x</sup> enge <sup>x</sup> -S---LKKEVNTPSLLTFGILNVANDES <sup>x</sup> VKEFVK                 | 2p.0 |
| SDR9-1C2 | A. californica  | GHALTIKLD <sup>x</sup> SLGIQVFAGCLEDRGPG-AL-ELKNRC-SD <sup>x</sup> r <sup>x</sup> l <sup>x</sup> HIL-KLDVTNSKDIAEASN | 2p.1 |
| SDR9-1C5 | A. californica  | GHRLS <sup>x</sup> ir <sup>x</sup> LNMKG <sup>x</sup> FHVISGCLTQKGAD-T---LTQLC-PDRLSAL-LLNVADSDSIQKAYK               | 1p.1 |

|          |                 |                                                                                                                                                               |      |
|----------|-----------------|---------------------------------------------------------------------------------------------------------------------------------------------------------------|------|
| SDR9C1   | H. sapiens      | IVRSSLKDPE <sup>x</sup> kg <sup>x</sup> MWGLVNNAGISTF-GEVEFTSLETYKQVAEVLN <sup>x</sup> WGTVRMTKSFLPLIR                                                        | 4p.2 |
| SDR9C2   | H. sapiens      | KVAAML--QD <sup>x</sup> rg <sup>x</sup> LWAVINNAGVLGFP <sup>x</sup> TGELLMTDYKQCMANVFFGTVEVTKTFLPLL <sup>x</sup> R                                            | 2p.2 |
| SDR9C3   | H. sapiens      | F <sup>x</sup> TKAHT--TS <sup>x</sup> tg <sup>x</sup> LWGLVNNAGHNEVVADAELSPVATFRSCMEVNFFGALELT <sup>x</sup> KGLPLLR                                           | 2p.2 |
| SDR9C4   | H. sapiens      | WVK <sup>x</sup> NQV--GE <sup>x</sup> kg <sup>x</sup> LWGLINNAGVPGVLAPT <sup>x</sup> DWLTLEDYREPIEVNLFGLISVTLNMLPLV <sup>x</sup> K                            | 1p.2 |
| SDR9C5   | H. sapiens      | WVEMHV--KE <sup>x</sup> ag <sup>x</sup> LFGLVN <sup>x</sup> NAGVAGII <sup>x</sup> GTPWLT <sup>x</sup> RDDFQ <sup>x</sup> RVLN <sup>x</sup> VNTMGPIGVTLALLPLLQ | 1p.2 |
| SDR9C6   | H. sapiens      | WVKEHV--GD <sup>x</sup> rg <sup>x</sup> LWGLVNNAGILTPITLCEWLNTEDSMNMLKVNLI <sup>x</sup> GIQVTL <sup>x</sup> SMLPLVR                                           | 1p.2 |
| SDR9C7   | H. sapiens      | WVRDKV--GE <sup>x</sup> qg <sup>x</sup> LWALVNNAGVGLPSGPN <sup>x</sup> EWLT <sup>x</sup> KDDFVKVINVN <sup>x</sup> LVGLIEVTLHMLPMVK                            | 1p.2 |
| SDR9C8   | H. sapiens      | WVKECV--RD <sup>x</sup> kg <sup>x</sup> LWGLVNNAGISLPTAPNELLTKQDFVTILDVNLLGVIDVTL <sup>x</sup> SLLPLVR                                                        | 1p.2 |
| SDR9-1C2 | C. intestinalis | MIQDMI--G <sup>x</sup> deg <sup>x</sup> LWAVVNCAE <sup>x</sup> FYTV- <sup>x</sup> AEADWCSVEDYEQSMQVNYLGTVRVTKSLLHLIR                                          | 2p.2 |

| Accession | Species         | Sequence                                                       | Score     |
|-----------|-----------------|----------------------------------------------------------------|-----------|
| SDR9-1C2  | S. purpuratus   | EVKKIIP-HKaaLWGVVNNAGISGLAGYLEWTRREDYDEYKVLAVNLFGVVDVTLTFLPLLK | 3p.2      |
| SDR9-1C2  | C. elegans      | FVKKSL--GNHKLWGVVNNAGIFSCYGPDDWCRMNDYKALADVNCGLGIVRVTQAFKKLVK  |           |
| SDR9-1C4  | C. elegans      | LVEKTV--ENRGLWGVVANAGILGNSGPDWLSAQDYIntMQVNTFGVMRFIQGLKKFVK    | 3p.0      |
| SDR9-1C2  | A. californica  | YIKSRV--GegLWGLVNNAGVWCF-AELGMTSETIVQKVMVDNLFGLAVRMTRAVLPLIK   | 2p.2      |
| SDR9-1C5  | A. californica  | HVQDLLP-AGkgLWAVVNNAGISGNTSRIEMCTKQDFVDAIDINLFGPIEVSRFTFLPLLK  | 2p.2      |
|           |                 | * * * *                                                        |           |
|           |                 | + +                                                            |           |
| SDR9C1    | H. sapiens      | RAkgRVVNISMLGRMANPARSPYCITKFGVEAFSDCLRYEMYPLGV--KVSVVEPGNFI    | 5p.2      |
| SDR9C2    | H. sapiens      | KSKGRLVNVSSMggGAPMERLASYGSSKAAVTMFSSVMRLELSKWGI--KVASIQPGGFL   | 3p.2      |
| SDR9C3    | H. sapiens      | SSRGRIVTVGSPagDMPYPCLGAYGTSKAAVALLMDTFSCCELLPWGV--KVSIIQPGCFK  | 3p.2      |
| SDR9C4    | H. sapiens      | KAQGRVINVSSVGGRLAI-VGGGYTPSKYAVEGFNDSLrrDMKAFGV--HVSCIEPGLFK   | 2p.1      |
| SDR9C5    | H. sapiens      | QARGRVINITSVLGRLLAA-NGGGYCVSKFGLEAFSDSLrrDVAHFGI--RVSIVEPGFFR  | 2p.1      |
| SDR9C6    | H. sapiens      | RARGRIVNVSSILGRVAF-FVGGYCVSKYGVFAFSDILrrEIQHFGV--KISIVEPGYFR   | 2p.1      |
| SDR9C7    | H. sapiens      | RARGRVNVMSSSGRVAV-IGGGYCVSKFGVEAFSDSIrrELYFGV--KVCIEPGNYR      | 2p.1      |
| SDR9C8    | H. sapiens      | RARGRVNVSSVMGRVSL-FGGGYCISKYGVFAFSDSLrrELSYFGV--KVAMIEPGYFK    | 2p.1      |
| SDR9-1C2  | C. intestinalis | RGRGRIVNLSSMagCLARAGQSAYSASKFALEAFTDSLRLQEMLKWGV--YVTLVEPAYFP  | 3p.2 4p.2 |
| SDR9-1C2  | S. purpuratus   | ESSGRLVNVSSAGRVSA-LPGGYCESKFAVEAFSDAVrrERKHFGYLFKVSIIIEPGGFA   | 4p.1      |
| SDR9-1C2  | C. elegans      | AAKGRIVTVTSVNGRLSTPAAGPYVVSFKGAAAYMDCIrrELYNFGV--KVSILEPGIFR   | 3p.1      |
| SDR9-1C4  | C. elegans      | KQEGrvVIISSISGRTPRPTVGPYCVSKHAVEAYADVrrhelIDFNV--SVHLLPEPGFFT  | 4p.1 5p.1 |
| SDR9-1C2  | A. californica  | QAQGRIVNVSSLIgRISVEGCGAYSMSKHALVAFTNTLRMEMKKWGV--CVSLVEPTGYF   | 4p.2      |
| SDR9-1C5  | A. californica  | QTRGRVVCITSILGRYPS-GPAPYCTSKCGLEAFCDVrrEVYLQGI--KVSILEPGVFR    | 3p.1      |
|           |                 | ** * * * *                                                     |           |
| SDR9C2    | H. sapiens      | --tnIAGTSDKWEKLEKDILDHLPAEVQEDYQGDYILAQRNFLLL-INSL-----        | 4p.2      |
| SDR9C3    | H. sapiens      | --teSVRNVGQWEKRRKQLLLANLPQELLQAYGKDYIEHLHGQFLH-SRLR-----       | 4p.2      |
| SDR9C1    | H. sapiens      | AATSLYS-PESIQAIAKKMWEELPEVVRKDYGKKYFDEKIAKMET-YCSS-----        |           |
| SDR9C4    | H. sapiens      | --TNLAD-PVKVIEKKLAIWEQLSPDIKQQYGEgyIEksLDKLKG-NKSY-----        | 3p.2      |
| SDR9C5    | H. sapiens      | --TPVTN-LESLEKTLQACWARLPATQAHYGGAFLTkyLKMQRIMNLI-----          | 3p.2      |
| SDR9C6    | H. sapiens      | --TGMTN-MTQSLERMKQSWKEAPKHiketYQGOYFDalYNIMKE-GLLN-----        | 3p.2      |
| SDR9C7    | H. sapiens      | --TAILG-KENLESRMKRLWRLPQETRDSYGEDYFRiyTDKLKN-IMQV-----         | 3p.2      |
| SDR9C8    | H. sapiens      | --TAVTS-KERFLKSFLEIWRSSPEVKEAYGEKFVAdyKKSAEQ-MEQK-----         | 3p.2      |
| SDR9-1C2  | C. intestinalis | eGSLVLS-----EPQTSVRLKRPVDPHVKEVYGEDYFVDFINSVSRNDPTTQEEGKSKSTE  |           |
| SDR9-1C2  | S. purpuratus   | --TPLAS-KDNLRSVTAAWERLSDVQKKEFPESMLHefVDEKSSLISSM-----         | 5p.2      |
| SDR9-1C2  | C. elegans      | --TPLLD-EQAMLKRVVDHVTQIDDETRETEYGETFKNyfAKMWNKTYISM-----       | 4p.2      |
| SDR9-1C4  | C. elegans      | --TNITQ---TATNDLDAVWERLDDETKKEYGKEFYDdyKNSRF-SRLSH-----        | 6p.2      |
| SDR9-1C2  | A. californica  | --tgVMQ-EHSLQRKKEELWSALDEETRqiYKGKEYFDSAYAHILT-HAQS-----       | 5p.2 6p.2 |
| SDR9-1C5  | A. californica  | --TNIMD-FESLKSCESSFDQASDEVKTAYGPDYVKnYVTLVSE-TMKG-----         | 4p.2      |
| SDR9C1    | H. sapiens      | -----GSTDSPVIDAVTHALTATTPYTRYHPMDY--YWWLRMQIMTHLPGAISDMI       |           |
| SDR9C2    | H. sapiens      | -----ASKDFSPLVRDIQHAILAKSPFAYYTPGKGAYLWIC---LAHYLPIGIYDYF      |           |

|          |                 |                                                                |
|----------|-----------------|----------------------------------------------------------------|
| SDR9C3   | H. sapiens      | -----AMSDLTPVVDAITDALLAARPRRRYPGQGLGLMYF---IHYYLPEGLRRRF       |
| SDR9C4   | H. sapiens      | -----VNMDLSPVVECMDHALTSLFPKTHYAAGKDAKIFWI---PLSHMPAALQDFL      |
| SDR9C5   | H. sapiens      | -----CDPDLTKVSRCLEHALTARHPRTRYSPGWDAKLLWL---PASYLPAASLVDAV     |
| SDR9C6   | H. sapiens      | -----CSTNLNLVTDCEMEHALTSVHPRTRYAGWDAKFFFI---PLSYLPTSLADYI      |
| SDR9C7   | H. sapiens      | -----AEPRVRDVINSMEHAIVSRSPRIRYNPGLDAKLLYI---PLAKLPTPVTDFI      |
| SDR9C8   | H. sapiens      | -----CTQDLSLVTNCMEHALIACHPRTRYAGWDAKLLYL---PMSYMPFTFLVDAI      |
| SDR9-1C2 | C. intestinalis | SSTLKSSPDFGNTNRVLHALSEAVTAYSPKVRYFVGSEFQDRMVK--SASAFLLPTVVMDDY |
| SDR9-1C2 | S. purpuratus   | -----ATTDLISKVTDVIEHALFSKWPKTRYAVGWDKVMVW---PMSYMPSWIQDRL      |
| SDR9-1C2 | C. elegans      | -----STTKIHYVVDNYYHALTAKYPRHRYCGWDAIFVYV---PLSLLPTWWADYV       |
| SDR9-1C4 | C. elegans      | -----CADDLNPVIDAYDHALLGKYPKTRYWVGWDTILFYI---PLATLPTFAQDWF      |
| SDR9-1C2 | A. californica  | -----YPRDLSPVIRCLRSALLSKRPREFPCGGGAEILMC---VYPLLPMVMADCV       |
| SDR9-1C5 | A. californica  | -----ASTDIDQVVDAYVHAITSKFPRTRYVVGNDAKFIYI---PLSLVPDWCWDWI      |
|          |                 | *                  *                  *                        |
|          |                 |                                                                |
| SDR9C1   | H. sapiens      | YIR-----                                                       |
| SDR9C2   | H. sapiens      | AKRHFGQDK-PMPRALRMP-----NYKKKAT-----                           |
| SDR9C3   | H. sapiens      | LQAFFIS-H-CLPRALQPGQPGTTPQDAAQDPNLSPGPSPAVAR                   |
| SDR9C4   | H. sapiens      | LLKQKAEL--ANPKAV-----                                          |
| SDR9C5   | H. sapiens      | LTWVLPKP--AQAVY-----                                           |
| SDR9C6   | H. sapiens      | LTRSWPKP--AQAV-----                                            |
| SDR9C7   | H. sapiens      | LSRYLPRP--ADSV-----                                            |
| SDR9C8   | H. sapiens      | MYWVSPSP--AKAL-----                                            |
| SDR9-1C2 | C. intestinalis | LTSGSLSK--CVPKVIKEKQE-----                                     |
| SDR9-1C2 | S. purpuratus   | CP-----                                                        |
| SDR9-1C2 | C. elegans      | IRSLGKQE--VVPACLEDSESMK-----KKN-----                           |
| SDR9-1C4 | C. elegans      | ISFQRCSR--PVPASMKNNH-----                                      |
| SDR9-1C2 | A. californica  | SSSINLVKQLRPQALSGMTT-----R-----                                |
| SDR9-1C5 | A. californica  | VRSLINYT--ISKKR-----                                           |

Figure S26. Alignment of the invertebrate orthologs of the human SDR9C family variants. For further details see Fig. S25 and Table S28.

\* symbol marks the position of identical amino acid residues of the aligned SDR protein sequences.

|                           |                                                            |
|---------------------------|------------------------------------------------------------|
| SDR10E1 H. sapiens        | -----                                                      |
| SDR10E2 H. sapiens        | -----                                                      |
| SDR10-1E1 C. intestinalis | -----                                                      |
| SDR10-2E1 C. intestinalis | -----                                                      |
| SDR10-1E1 S. purpuratus   | -----                                                      |
| SDR10-1E1 D. melanogaster | MSHAVANKTETEAAPNSSLKQSAAPQPANSH-----DAKLLNGTLAR            |
| SDR10-1E1 A. gambiae      | -----                                                      |
| SDR10-1E1 A. mellifera    | -----                                                      |
| SDR10-1E1 C. elegans      | -----                                                      |
| SDR10-1E1 A. californica  | MSEDCEQG-----GGEMTVSSPQQPSKTNQSSSIVKDLIMKTTMVPEKEVVVNGFHNT |

|                           |                                                             |
|---------------------------|-------------------------------------------------------------|
| SDR10E1 H. sapiens        | -----                                                       |
| SDR10E2 H. sapiens        | -----                                                       |
| SDR10-1E1 C. intestinalis | -----                                                       |
| SDR10-2E1 C. intestinalis | -----                                                       |
| SDR10-1E1 S. purpuratus   | -----MPCF--DDNGPICAPLDG-----                                |
| SDR10-1E1 D. melanogaster | TNGL-----THAASVATSSSGSYGS                                   |
| SDR10-1E1 A. gambiae      | -----                                                       |
| SDR10-1E1 A. mellifera    | -----                                                       |
| SDR10-1E1 C. elegans      | -----                                                       |
| SDR10-1E1 A. californica  | LNGAGEDQETLRKPGDSNTFTNSNGSNKIPTSMDPVTSPLSPLTQVASTLAPSLKQYED |

|                           |                                                             |
|---------------------------|-------------------------------------------------------------|
| SDR10E1 H. sapiens        | -----M                                                      |
| SDR10E2 H. sapiens        | -----M                                                      |
| SDR10-1E1 C. intestinalis | -----MA--DSQEIPVNV                                          |
| SDR10-2E1 C. intestinalis | -----MDYSDVLPkky                                            |
| SDR10-1E1 S. purpuratus   | ----EHSMSGGV-----VDVTDEAFA--mkLNNLPASMAY                    |
| SDR10-1E1 D. melanogaster | SSAAGSNAGSGGPTSSASLSIAAGVASSTALPLPPSSNGLQMPYE-----RFRADDTSY |
| SDR10-1E1 A. gambiae      | -----MDDEQQRSMATTVVQREMMATTTTTTAAAA                         |
| SDR10-1E1 A. mellifera    | -----MSTISDNQC                                              |
| SDR10-1E1 C. elegans      | -----MA                                                     |
| SDR10-1E1 A. californica  | FLPKTTQDGVGSPSRTP-----EMSILHEHYEHRHATSPKLAVSAGE             |

1p.0  
1p.0

|                           |                                                               |
|---------------------------|---------------------------------------------------------------|
|                           | x x x                                                         |
| SDR10E1 H. sapiens        | VSIPYYEGKNVLLTGATGFLGKVLLEKLLRSCPKVNSVYVLVRQKAGQTPQERVEEVLS   |
| SDR10E2 H. sapiens        | STIAAFYGGKSILITGATGFLGKVLMEKLFRTSPDLKVIYILVRPKAGQTLQQRVFAQILD |
| SDR10-1E1 C. intestinalis | PSIAEFFSGKSVAITGATGFIGTCLVEKILRCCPGVLKIFVFIREKKDKSATERLAHLTQ  |
| SDR10-2E1 C. intestinalis | PTIADFYAGKTVAMTGGTGFLGQGITEKLLRCCPDINKIILFIRHKRNCDPKERLQQLAQ  |
| SDR10-1E1 S. purpuratus   | CSIGEFYAGKTLMITGATGFIGKVMLEKLMRCCPDIKKVFLLRPKSGQRAAAARIQEITA  |
| SDR10-1E1 D. melanogaster | VP1AQFYAGRSVFITGGTGFMGkvLVEKLLRSCPEIRNIYLLIRPKRGQEV SARLTLLN  |
| SDR10-1E1 A. gambiae      | ASIAESYAGRSIFITGATGFMGKIMVEKLLRDCGELRCIYLLIRAKKGVDPAQRKEEYVK  |
| SDR10-1E1 A. mellifera    | TSVRDFYKDRSIFITGGTGFMGKVLVEKLLRSCPGIKNIYILMRPKKSQDIQORLQKLLD  |
| SDR10-1E1 C. elegans      | FSVRDVFYAGSSVLLTGGTGFLGKVIVEKLLWTIDDIQNIYLMIRTRKGNPQERLSGLLh  |
| SDR10-1E1 A. californica  | LTVPLYYAGKSVLLTGGTGFMGKVLVEKLLRSCPELDSLYCLIRPKNKQSIEARLNEITS  |
|                           | ** *** * ** * *                                               |

1p.0  
  
1p 0

|                           |                                                             |
|---------------------------|-------------------------------------------------------------|
| SDR10E1 H. sapiens        | Gk1FDRLRDENPDFREKIIAINSELTPQKLALSEEDKEVIIDST-----           |
| SDR10E2 H. sapiens        | Sk1FEKVEVCNPNVHEKIRAIYADLNQNDFAISKEDMQELLSC-----            |
| SDR10-1E1 C. intestinalis | LqvFDTVRTQQPDFQLKLVAVPCDLEKEGFDLSEESQTQIQNEV-----           |
| SDR10-2E1 C. intestinalis | KpaFDILRKTPQNFQAEKLAFAVSCDLEADDGLSKEDRKTQLQNEV-----         |
| SDR10-1E1 S. purpuratus   | G11FDKVREAQPNFQSKLIAIDCDLTPDLALKEEDIKTLQEETELAFHVAATVRFDEKL |
| SDR10-1E1 D. melanogaster | Ap1FESLRQEKPKELSKVIPISGDITSEELGISEKDqnLLCRNV-----           |
| SDR10-1E1 A. gambiae      | NIVFDHVRERYSERLGKIRLIRGDILSPGLGLSDDDRRELTENV-----           |
| SDR10-1E1 A. mellifera    | Vp1FDKLRRDTPDELLKIIPIAGDVTHELGISEADQNVIIRDV-----            |
| SDR10-1E1 C. elegans      | dPLFNRIHQEKPEAFDKLKAIGGDMMVENLGMPDPEDVMLIRDnv-----          |

1p.0  
1p.0  
1p.0  
2p.0  
2p.0  
2p.0 3p.0  
  
1p.0  
2p.0

|                           |                                                               |           |
|---------------------------|---------------------------------------------------------------|-----------|
| SDR10-1E1 A. californica  | Tk1FDRLRKERPDPFASKLRPIHGDMLLPDLGLSPEDRAELEQKI-----            | 1p.0      |
|                           | * *                                                           |           |
| SDR10E1 H. sapiens        | -----                                                         |           |
| SDR10E2 H. sapiens        | -----                                                         |           |
| SDR10-1E1 S. purpuratus   | s1SLHLNVYATKKILQLAQGMKKL11FDKVEAQPNFQSKLIAIDCDLTEPDLALKEEDI   | 3p.1 4p.0 |
| SDR10-1E1 C. intestinalis | -----                                                         |           |
| SDR10-2E1 C. intestinalis | -----                                                         |           |
| SDR10-1E1 D. melanogaster | -----                                                         |           |
| SDR10-1E1 A. gambiae      | -----                                                         |           |
| SDR10-1E1 A. mellifera    | -----                                                         |           |
| SDR10-1E1 C. elegans      | -----                                                         |           |
| SDR10-1E1 A. californica  | -----                                                         |           |
| SDR10E1 H. sapiens        | -----NIIFHCAATVRFNENLrdAVQLNVIATRQLILLAQQMKNLEVFMHVSTAYAYC    | 2p.1      |
| SDR10E2 H. sapiens        | -----NIIFHCAATVRFDDTLrhAVQLNVTATRQLLLMASQMPKLEAFIHISTAYSNC    | 2p.1      |
| SDR10-1E1 C. intestinalis | -----NIFIHSAATLRFNEHIrlSYQINTLGVRTMLKLCRTIKNLVSIVHISTaYSFC    | 2p.1 3p.2 |
| SDR10-2E1 C. intestinalis | -----NVFYHSAATLKFNEHLriSFDINVQCVRKLLKLR--WDNLQAFVHISTaYAHT    | 3p.1 4p.2 |
| SDR10-1E1 S. purpuratus   | KTLQEETELAFHVAATVRFDEKLSLSLHLNVYATKKILQLAQGMKKLlvFQHVSTAYANC  | 5p.0      |
| SDR10-1E1 D. melanogaster | -----SVVFHSAATVKFDEKLKLSVTINMLGTRKRLVELCHRMLSLdaliHVSTAYCNC   | 4p.0      |
| SDR10-1E1 A. gambiae      | -----ELVFHCAANVRFDQHIRQAVDINLNGTIRVLGLAEQMRRLVSFVHVSTAYCQC    |           |
| SDR10-1E1 A. mellifera    | -----SIVFHSAATVKFDEPLKRSVHINMIGTKQLNLCHRMHNLlealiHVSTAYCNC    | 2p.0      |
| SDR10-1E1 C. elegans      | -----NVVIHSAATVKFDEHLRAAVTMNVIGTKRIIDLCHQIKDLkvLVHVSTAYANC    | 3p.0      |
| SDR10-1E1 A. californica  | -----NIVFHSAATIRFDEPLRVAVMNVVAVRKMLALARKLEHLleaFVHVSTAYANC    | 2p.0      |
|                           | * ** * *                                                      |           |
|                           | + +                                                           |           |
| SDR10E1 H. sapiens        | NRKHIDEVVYPPVPDPKKLIDSLewMDDGLVNDITPKLIGDRPNTYIYTKALAEYVVQQE  | 3p.1      |
| SDR10E2 H. sapiens        | NLKHIDEVIYPCPVEPKKIIDSLeWDDAIIDEITPKLIRDWPNIIYTYTKALGEMVVQQE  | 3p.1      |
| SDR10-1E1 C. intestinalis | DRKDIGEEVYKTGWNFNKLHDTMQWMNDMLTKLTPDILDRpNTYTLTKAFGEEVIVKE    | 4p.1      |
| SDR10-2E1 C. intestinalis | DRKFVGEFFYDCGVLDLEAMFKWMDDDTVEQLTPSLLSKsrpNTYTLTKALAEADAVCRE  | 5p.1      |
| SDR10-1E1 S. purpuratus   | DRSRIEEVVYPPVPDPYKMLDAVewMSEDMIQTLPKLLGKRPNNTYFTTKALAEYVVMEE  | 6p.1      |
| SDR10-1E1 D. melanogaster | DRTDVSEVIYAPPYNPDDIISLINWLPEDILDqlTPRLIGKRPNNTYFTTKALAEHMLLKE | 5p.0      |
| SDR10-1E1 A. gambiae      | NEAVLEEKHYPAFQNPBGISKMVGLDDDDLDIITPr1LNNLPNTYAYTKALTEDMVYQY   | 1p.1      |
| SDR10-1E1 A. mellifera    | DRYDVAAEIIYPVSAPEEIEIMALTKLMDSQMDNITPTLIGNRPNTYFTTKALTERMLQSE |           |
| SDR10-1E1 C. elegans      | DRFETTEkiYKSPMAPQKLVDALSWMDDETLTkitPKILGLRPNTYTLTKALAESTIETE  | 4p.0 5p.0 |
| SDR10-1E1 A. californica  | DRPYIEETVYPPVPVEPQKIIDVLeWMDDEMLELFTPKLMGEKPNTYTYTKQLAEHLITE  | 3p.1      |
|                           | * * ** * * *                                                  |           |
| SDR10E1 H. sapiens        | GAKLNVAIVRPSIVGASWKEPFpgWIDNFNGPSGLFiaaGKGILRTIRASNNALADLVPV  | 4p.0 5p.0 |
| SDR10E2 H. sapiens        | SRNLNIAIIRPSIVGATWQEPFpgWVDNNGNGNGIIiatGKGFLRAIKATPMAVADVIVP  | 4p.0 5p.0 |
| SDR10-1E1 C. intestinalis | GEGLPVCIVRPSIVGATYSDPVagWCSNFNGATGLFIAYGKGLMRSLYVKRDICMDIIPA  | 5p.0      |
| SDR10-2E1 C. intestinalis | SGNLPICIVRPSMIIPAWREPMpgWCTNVYGTAFIIAYGKGVLRCCADRKINADNIP     | 6p.0      |
| SDR10-1E1 S. purpuratus   | GKGMPICITRPSIVGASWKEPFpgWIDNFNGPSGVFIavGKGLLRMTIGDADAVVDISP   | 7p.0 8p.0 |
| SDR10-1E1 D. melanogaster | AGNLPAIVRPSivTASLNEPFAGWVDNFNGPTGLVSALAKGMFRMTMCEKNYVADMVPV   | 6p.0      |
| SDR10-1E1 A. gambiae      | RGKLPiAIARPSIVTAAMKEPLPGWEGGTNGPTGLLIGAGRGVIRSMHCNGEYLADFMPV  |           |
| SDR10-1E1 A. mellifera    | CGHLPIAIVRPSIVLSSFREPVSGWVDNLNGPTGIVAAAGKGFfrsMLCQKNMVADLVPV  | 3p.1      |
| SDR10-1E1 C. elegans      | AKDIPVIIIRPSIVGAMWQGPLPGWTDNNGPTGIFAAVGRGVLTNMGCSSESKADIIPV   |           |
| SDR10-1E1 A. californica  | GAGLPLAIVRPSIVGAAWKEPFpgWIDNNGPSGIYIAAGRGIILRSMKGESKAIADIVPV  | 4p.2      |
|                           | * ** * * *                                                    |           |
| SDR10E1 H. sapiens        | DVVVNMSLAAAWYS-GVN-----                                       |           |
| SDR10E2 H. sapiens        | DTVVNMLAVGWYT-AVH-----                                        |           |
| SDR10-1E1 C. intestinalis | DLVVNGTIAAAWRNAVCHNPVSANSVLSTSPliDRRSNSTFSSASDLSEL-----RTL    | 6p.2      |
| SDR10-2E1 C. intestinalis | DFIVNGAVSAGMKT-ACD-----FVHRRRSSGYNSSDGEESLDDGVEELSSG          |           |
| SDR10-1E1 S. purpuratus   | DFVVNAMIGATWHT-GVH-----                                       |           |



|           |                 |                                                               |       |       |
|-----------|-----------------|---------------------------------------------------------------|-------|-------|
| SDR10-1E1 | D. melanogaster | DIVINLMIAAAWRT-ATR-----                                       |       |       |
| SDR10-1E1 | A. gambiae      | DVTMNAIIAIGTERMANA-----                                       |       |       |
| SDR10-1E1 | A. mellifera    | DIVINLMICTAWRT-ATN-----                                       |       |       |
| SDR10-1E1 | C. elegans      | DIVANMIIASASYR-TSI-----                                       |       |       |
| SDR10-1E1 | A. californica  | DIPVNMIVVAWYT-AVA-----                                        |       |       |
|           |                 | *   *                                                         |       |       |
|           |                 |                                                               |       |       |
| SDR10E1   | H. sapiens      | -----rPNIMVYNCTTGSTNPFHWGEveYHVISTFKR                         | 6p.1  | 7p.2  |
| SDR10E2   | H. sapiens      | -----rPKSTLVYHITSGNMNPCNWHKmgVQVLATFEK                        | 6p.1  | 7p.2  |
| SDR10-1E1 | C. intestinalis | R-----EREESPEIELRRKTLPIYNLVASSSNPVLMRewndIMTSSYTn             |       | 7p.2  |
| SDR10-2E1 | C. intestinalis | TERSDSPGSsvFAESAVVEIPSSAARKSTKIPIYNINSSTTNPLLLHDleIYTKETIDV   | 7p.2  | 8p.2  |
| SDR10-1E1 | S. purpuratus   | -----kPANIPIYNLVTSFPVNPNRWGDveII-PDLYNR                       | 9p.1  | 10p.2 |
| SDR10-1E1 | D. melanogaster | -----KSNLLIYNCCGTGQRNPIIWSEFVKHAMTSVRK                        |       |       |
| SDR10-1E1 | A. gambiae      | -----RKEDVMYYNLTSSADNPISWGEVLEMGRGILNQ                        |       |       |
| SDR10-1E1 | A. mellifera    | -----RTKTIPIYHCCTGQQNPITWQQFVELILKYNRm                        |       |       |
| SDR10-1E1 | C. elegans      | -----ntTEIPVIHCSSGELNPLYWGHIVLFLEQFYKk                        | 6p.1  | 7p.0  |
| SDR10-1E1 | A. californica  | -----KPGQVLTyHATTGGCNPYTWGDIsGIVNKSyKQ                        |       | 5p.2  |
|           |                 | ***                                                           |       |       |
|           |                 |                                                               |       |       |
| SDR10E1   | H. sapiens      | NPLEQA-FRRPNVNLTNSHLLYHYWIAVSHKAPAFlyDIYLRMTGRSPrmMKTITRLHKA  |       | 8p.1  |
| SDR10E2   | H. sapiens      | IPFERP-FRRPNANFTSnsFTSQYWNNAVSHRAPAIYDCYLRLTGRKPrmTKLMNRLLRt  |       | 8p.1  |
| SDR10-1E1 | C. intestinalis | YPLDA--LMSpDLKVASnkIMFRVLFffKQYIPAYIFDAGLILIGKKPqllRWTQRVSGT  | 8p.1  | 9p.1  |
| SDR10-2E1 | C. intestinalis | YPMKSASFFPPSCILTTnqkVMDYATFALQTVPAHIIDTILALTKQKRqmVKWDGKIRSG  | 9p.1  | 10p.1 |
| SDR10-1E1 | S. purpuratus   | IPLEKV-FRRPRAALTKYpIAfEYVNLVSAKIPAYIMDCALRLQGKKPqmMKVNSKITKM  | 11p.1 | 12p.1 |
| SDR10-1E1 | D. melanogaster | HPleGC-LWYPTGDLRMNRPMTNLNCIAKHFLPAYILDGVARIMGKKPfvVNVQNKIAKA  | 7p.2  | 8p.1  |
| SDR10-1E1 | A. gambiae      | NPFCFA-LWYPDGSIKSNLYLHLLCVLFLHYLPAYLIDFLMVLLRRKPlVKVQKRISAG   |       | 2p.1  |
| SDR10-1E1 | A. mellifera    | HPPNDT-IWWPDGKCHTFAIVNNVCKLFQHLPAHILDfIFRLRGKPAIMVGLHEKIDKA   |       |       |
| SDR10-1E1 | C. elegans      | yPMEQC-FAVPSTYFHKSRSFLINYYIKHHIPAAISDISARLIGKRknVKLYSKVWKM    |       | 8p.1  |
| SDR10-1E1 | A. californica  | IPLEGC-FRRPNVAIVSNnflLHEYWTCVSHLIPAYMIDLAYRMMGKKPrMVRLYNKLHRS | 6p.1  | 7p.1  |
|           |                 | *   *   **   *                                                |       |       |
|           |                 |                                                               |       |       |
| SDR10E1   | H. sapiens      | MVFLEYFTSNsWVWNTENVNMLMNQLNPEDKktFNIDVRQLHWAeyIENYCLGTkKYVLN  | 9p.0  |       |
| SDR10E2   | H. sapiens      | VSMLEYFINRSWEWSTYnTEMLMSELSPEDQrvFNFDVRQLNWLEYIENYVLGVkKYLLK  | 9p.0  |       |
| SDR10-1E1 | C. intestinalis | IGVLQFFLTsqQWNWNNStQKLQREMEQDRkqFNMDAAVVDWEQYMNNYAKGtKKFILK   | 10p.0 |       |
| SDR10-2E1 | C. intestinalis | MEVMGFFFTNGFVWNRDETDRLHNCLHPKDQktFTLDARAFVWREYfNDYILGAKKFILK  | 11p.0 |       |
| SDR10-1E1 | S. purpuratus   | VHTLKYFTNNTWEWTNQNTIALSAAmSEEDRkvYFTDVRPLHWPTyLEAYCLGTkKYVLK  | 13p.0 |       |
| SDR10-1E1 | D. melanogaster | VECLEYFATRQWRfKDDNVHALLHTLSPKDRIEIFVFDVRHINWDKYVERYVLGFREFLFK |       |       |
| SDR10-1E1 | A. gambiae      | LTILQYYTTKEWVFRCdNTKSlyQLSPDDRKRfYFDVNEINyKTYLYDFILGARQYILK   |       |       |
| SDR10-1E1 | A. mellifera    | VKCLEYFTMQQWNFRDDNVrQLSGELSPEDRQIFMFDVKQIDWPSyLEQYILGIRQFIK   |       |       |
| SDR10-1E1 | C. elegans      | IETLHFFTTRGWSfNARGLPEffEKMTpADQKEYNFdVRQVDWNSyLFDyVMGIKKFLLK  |       |       |
| SDR10-1E1 | A. californica  | IDVLKFFTCNEWQWSSTNHdMLKHQLTPlDQkmFYFDPKPLHWPTyIENyCMGAKKYVLN  | 8p.0  |       |
|           |                 | *   *   *   *                                                 |       |       |
|           |                 |                                                               |       |       |
| SDR10E1   | H. sapiens      | EEMSGLPAARKHLNklRNIRYGFNTILV---IL-----IWRIFIARSQm--           | 10p.1 |       |
| SDR10E2   | H. sapiens      | EDMAGIPKAKQLKklRNIHYLFNTALF---LI-----AWRLLIARSQm--            | 10p.1 |       |
| SDR10-1E1 | C. intestinalis | EDPMNYPAAARRHVqr1RILGYCSQLLVF---MV-----VWRLLVPRSGI--          | 11p.1 |       |
| SDR10-2E1 | C. intestinalis | ENIEDFSKEQKAMqrmkTlSKVGLQTIAGVSALGLASAVGLTSSlWELSSyVLG-----   | 12p.1 |       |
| SDR10-1E1 | S. purpuratus   | EDMDIPAAARSHLkmLRNIrWTFNTVLL---VV-----FWRVLIARSQl--           | 14p.1 |       |
| SDR10-1E1 | D. melanogaster | QRPESLPASRKRMLr1YYLHQLTKLVAV---LL-----TWRFLMSRSKR--           | 9p.1  |       |
| SDR10-1E1 | A. gambiae      | EAPETLPKARKLLRklYIMDKIVQIGLY---LF-----GLWLAWTYLEVVT---        | 3p.1  |       |
| SDR10-1E1 | A. mellifera    | DSPETLPAAARSHIKklYWIQKVVEFGML---LV-----VLRFLLLRIPM--          | 4p.1  |       |
| SDR10-1E1 | C. elegans      | ENLENLNRsRAHLLkmRIRRQVIAAIVY---AG-----FISTI-GRKWKKT           | 9p.1  |       |
| SDR10-1E1 | A. californica  | EDLSGLPAARAHVRklRIIRYLFNMSVA---VV-----LWRVLIAKSQF--           | 9p.1  |       |

|           |                 |                                                              |
|-----------|-----------------|--------------------------------------------------------------|
| SDR10E1   | H. sapiens      | -ARNIWYFVVS <sup>*</sup> LCYK--FLSYFRASSTMRY-----            |
| SDR10E2   | H. sapiens      | -ARNVWFFIVSFCYK--FLSYFRASSTLKV-----                          |
| SDR10-1E1 | C. intestinalis | -AKNLWHLFMSLWFK--FLGFFQISSTLHRSNFFSR----ILSSS                |
| SDR10-2E1 | C. intestinalis | -DGLSWFV-----                                                |
| SDR10-1E1 | S. purpuratus   | -ARNLWAFVINIFFR--FLRYCRVTSTIAR---TH-----                     |
| SDR10-1E1 | D. melanogaster | -LNDLWSSFLENALR--M---ARLIPFL-----                            |
| SDR10-1E1 | A. gambiae      | --G-----SIQFVFD-----TAIESLRG--TTVRQGL-----                   |
| SDR10-1E1 | A. mellifera    | -AQSACFTLLSAILR--M---CRMIV-----                              |
| SDR10-1E1 | C. elegans      | TQYLTWFGAMLATYTYTEVSFRRHIPLKSLKDYTQTS <sup>*</sup> DYSRYLQKS |
| SDR10-1E1 | A. californica  | -ARNLWFFIVGLVSK--FVQYFRITSTMHK-----                          |

Figure S27. Alignment of the invertebrate orthologs of the human SDR10E1 family variants. For further details see Fig. S25 and Table S29.

\* symbol marks the position of identical amino acid residues of the aligned SDR protein sequences.

|           |               |                                                                |      |      |
|-----------|---------------|----------------------------------------------------------------|------|------|
|           |               | x x x                                                          |      |      |
| SDR11E1   | H. sapiens    | ----MAMTGWSCSLVTGAGGFLGQRIIRLLV---KEKELKEIRVLDKAFGPPELREEFskLQ |      | 1p.2 |
| SDR11E2   | H. sapiens    | -----MGWSCSLVTGAGGLLGQRIVRLLV---EKEKELKEIRALDKAFRPPELREEFskLQ  |      | 1p.2 |
| SDR11E3   | H. sapiens    | MADSAQAQKLVLVLTGGCGFLGEHVVRMLLQ--REPRLGELRVFDQHLGPWLEELktg--   |      | 1p.2 |
| SDR11-1E1 | S. purpuratus | ---MPGTEGEVVMVTGASGFLGQHILKQLLEQ-GEFLIKEVRTFDLQPFPTWCPEL-evHN  |      | 1p.2 |
| SDR11-1E1 | M. domestica  | -----MASGEVVLVTGGSGFIGQHIIRLLKDKSELGIKEVRVVDLNAFKNTI---dd--    |      | 1p.2 |
| SDR11-1E1 | C. briggsae   | -----MYTVAIVTGGAGLVGRVYVQRLL-NEQIAEVRVIDRQSTS-----re--         |      | 1p.2 |
|           |               | *** * *                                                        |      |      |
| SDR11E1   | H. sapiens    | NKTKLTVLEGDILDEPFLKRACQDVSVIHTACII----DVFGVTHRESIMNVNVkgTQL    |      | 2p.2 |
| SDR11E2   | H. sapiens    | NRTKLTVLEGDILDEPFLKRACQDVSVIHTACII----DVFGVTHRESIMNVNVkgTQL    |      | 2p.2 |
| SDR11E3   | H. sapiens    | -PVRVTAIQGDVTAHEVAAVAGAHVVIHTAGLV---DVFGRASPKTIHEVNVqgTRN      |      | 2p.2 |
| SDR11-1E1 | S. purpuratus | PTTQLSHIKGDLLECMEEVRAFAKGVTVVIHTAGVI---DVSPVPDAELLRSVNIqgSEN   |      | 2p.2 |
| SDR11-1E1 | M. domestica  | EKLDIKTFVGDLCPEPDSVEDAFKGVDTVFHCAGKM---SLQYPPKYDELNRNNIeatQS   |      | 2p.2 |
| SDR11-1E1 | C. briggsae   | ESRKLLKLYLMDLNRKPLENALLGCDGVICHAPHFPILYSKNKAEIDQMWRDNLdaces    |      | 2p.2 |
|           |               | * * *                                                          |      |      |
| SDR11E1   | H. sapiens    | LLEACVQASVPVFIYTSSIEVAGPNSYKEI---IQNGHEEEP-----LENTW           |      |      |
| SDR11E2   | H. sapiens    | LLEACVQASVPVFIYTSSIEVAGPNSYKEI---IQNGHEEP-----LENTW            |      |      |
| SDR11E3   | H. sapiens    | VIEACVQTGTRFLVYTSSMEVVGPNTKGHP---FYrgNEDTP-----YEAVH           | 3p.1 |      |
| SDR11-1E1 | S. purpuratus | VLQACIHHNIQYLVYTSTVDVIGQ---EP---ITAGTETIL-----GIPQHHH          |      |      |
| SDR11-1E1 | M. domestica  | VVDLCLKHNVQRILIYTSVCGSVCMPFKGSSSTVVINQTESKAATPMFDAKKPEEFDKQFI  |      |      |
| SDR11-1E1 | C. briggsae   | VVDTMISMNIRNLVNIGCAYSPIPNEDNYG-----LAQDV-----FIdYPRNYM         | 3p.1 |      |
|           |               | + +                                                            |      |      |
| SDR11E1   | H. sapiens    | PAPYPHKKLAEKAVLAANGWNLKNGG-TLYTCALRPMYIYGEGSRFLSA-SINEALNNN    |      |      |
| SDR11E2   | H. sapiens    | PTPYPSKKLAEKAVLAANGWNLKNGD-TLYTCALRPTYIYGEGGPFLSA-SINEALNNN    |      |      |
| SDR11E3   | H. sapiens    | RHPYPCSKALAEWLVLLEANGRkvRGGL-PLVTCALRPTGIYGEHGQIMRD-FYRQGLRLG  | 4p.0 |      |
| SDR11-1E1 | S. purpuratus | FGLYATTKYEAKEIVLKASNLILKNGK-RLQTCALRPTPVYGEEDTYNRD-VLRQACHYK   |      |      |
| SDR11-1E1 | M. domestica  | IRGYSSSKLKAQIVLSAHGKTLKNGTGQLTTAAIRPPLTYGEGDTFFMPDMLRYLSRHS    |      |      |
| SDR11-1E1 | C. briggsae   | LDKYGESRTRGEMYARKAA-----KRGSLNALFLRPTFVYGQKSKRIE-AIKELVQNA     |      |      |
|           |               | * * *                                                          |      |      |
| SDR11E1   | H. sapiens    | GILS-SVGKFSTVNPVYVGNVAWAHILALRALQDPKKAPSIRGQFYIISDDTPHQSYDNL   |      |      |
| SDR11E2   | H. sapiens    | GILS-SVGKFSTVNPVYVGNVAWAHILALRALRDPKKAPSVRGQFYIISDDTPHQSYDNL   |      |      |
| SDR11E3   | H. sapiens    | GWLFRAIPASVEHGRVYvgNVAWMHVLAAARELEQ--RATLMGGQVYFCYDGSPYRSYEDF  | 5p.2 |      |
| SDR11-1E1 | S. purpuratus | MMV-RMGSESSRYQCTYAGNIAWGHVLAVKELLKPTTNESPAQGAFFLTDETTPVSKVSDF  |      |      |
| SDR11-1E1 | M. domestica  | YVYPKIAGAGGKQQLCYagNVAWGHMCAYKSLKA--APKSVGGLPVFITDDTPLYDTSRF   | 3p.2 |      |
| SDR11-1E1 | C. briggsae   | ALPFVVTGERGMHQfiYAGNLAAIAEKSFCLLQ--DQKKFNGEIVFCMDENCAHSIRdf    | 4p.0 | 5p.0 |
|           |               | * * *                                                          |      |      |
| SDR11E1   | H. sapiens    | NYTLSKEFG-LRLDSRW-SFPLSLMYWIGFLLEIVSFLLRPIYTYRPPFN---RHIVTSL   |      |      |
| SDR11E2   | H. sapiens    | NYILSKEFG-LRLDSRW-SLPLTLMYWIGFLLEVVSFLLSPIYSYQPPFN---RHTVTLS   |      |      |
| SDR11E3   | H. sapiens    | NMEFLGPCG-LRLVGARPLLPHYWLLVFLAALNALLQWLLRPLVLYAPLLN---PYTLAVA  |      |      |
| SDR11-1E1 | S. purpuratus | FTPFGVIGVD-AK--MSSFSLPFWLLYSIAVVIEICAWLLQPIYKVKFFLT---TATVTYA  |      |      |
| SDR11-1E1 | M. domestica  | IQKIGLVSGKYKARHSSWSIPHFIFFAMLTFLFDLLEPVKKITLKYSI--RSLSSYA      |      |      |
| SDR11-1E1 | C. briggsae   | FENRFLNPN-Y-----SNDVAVNYWPSFVSSYTTYWKNQLGLpvPDKSLNHVSFRLFF     | 6p.0 |      |
|           |               | * * *                                                          |      |      |
| SDR11E1   | H. sapiens    | NSVFTFSYKKAQRDLAYKPLYSWEEAKQKTVEWVGSVLDVRHKE----TL--KSKTQ      |      |      |
| SDR11E2   | H. sapiens    | NSVFTFSYKKAQRDLAYKPLYSWEEAKQKTVEWVGSVLDVRHKE----TL--KSKTQ      |      |      |
| SDR11E3   | H. sapiens    | NTTFTVSTDKAQRHFGYEPFLFSWEDSRTRTILWVQAATGSAQ-----               |      |      |
| SDR11-1E1 | S. purpuratus | YGVYFQCCEGAERCLGYEPLYTYDDAVERSLVYRRECGLS-----                  |      |      |
| SDR11-1E1 | M. domestica  | SSIIFFNRLRASIHMDYVPLIDEETS VGNSAKWYGKWWENIGKGQRNGVAKSKNN       |      |      |
| SDR11-1E1 | C. briggsae   | EKTVGFPNKKLRLLLDKSKPEISQEEALANYANPKSFTTDS TKRSVAVKG-----       |      |      |
|           |               | *                                                              |      |      |

Figure S28. Alignment of the invertebrate orthologs of the human SDR11E family variants. For further details see Fig. S25 and Table S30.

\* symbol marks the position of identical amino acid residues of the aligned SDR protein sequences.

| Accession  | Species         | Sequence                                                               | Position |
|------------|-----------------|------------------------------------------------------------------------|----------|
| SDR12C1    | H. sapiens      | -----ME-----SALPAAGFLYVWGAGTVA--YLA                                    |          |
| SDR12C2    | H. sapiens      | -----MGDVLEQFFILTGLLVCLACLA                                            |          |
| SDR12C3    | H. sapiens      | -----MAAVDSFYLLYREIA--RSCN--CYMEALALVGAWYT-----                        |          |
| SDR12C-1C1 | C. intestinalis | -----MAAVDSVKLLVNQMTSDLQNYSSF-AWNLLSVIGAWYTLKYSVK                      |          |
| SDR12C-2C1 | C. intestinalis | -----ME-----CWLFTYIGIAT-C-SIVA                                         |          |
| SDR12C-1C1 | S. purpuratus   | -----MAAVDVGFDLLFRQVS--NGFH--IYSEVLSLIGAYYV-----                       |          |
| SDR12C-2C1 | S. purpuratus   | -----                                                                  |          |
| SDR12C-1C1 | D. arizonae     | -----MQPALELSIYTLRMAF-----IWQLISVAIYLVGTLAIAAYLYD                      |          |
| SDR12C-1C1 | D. ananassae    | -----MD-----SEL--LNILSVISISV-----                                      |          |
| SDR12C-1C1 | A. gambiae      | -----M-----VTT--SSVLGSTAVL-----                                        |          |
| SDR12C-2C1 | A. gambiae      | -----MLI-----ASQALWGLALIGVWALAWWMYD                                    |          |
| SDR12C-3C1 | A. gambiae      | -----MFCSLAACLGYYAAVWLYE                                               |          |
| SDR12C-1C1 | A. mellifera    | MMFHLRFFIGVHDDLPSLPVPTFQPFSSATKFKDRDYIQFI <b>W</b> kMILEIV--FWLF----F- | 1p.1     |
| SDR12C-1C1 | C. elegans      | -----MESSDNLHDIDNL----- <b>E</b> ngNMACQCFLVGAGYVALAAV-                | 1p.2     |
| SDR12C-1C1 | C. remanei      | -----MDLQWFAAGAGAVALLFI-                                               |          |
| SDR12C-1C1 | A. californica  | -----MIRQ-----YLGDSVDLFSVIGAGVTV--FVA                                  |          |
| SDR12C-2C1 | A. californica  | -MLSNRWFGS-----FRTFSLQLT-PSRILHFSDFIDVFAFLGAYYFVKKCLK                  |          |

[illegible]

|            |                 |                                                                |      |      |
|------------|-----------------|----------------------------------------------------------------|------|------|
| SDR12C1    | H. sapiens      | elAKHGMKVVLISRSKDKLDQVSSEike-KF-KVETRTIAVDFAS---EDIY---DKIKT   | 2p.0 | 3p.2 |
| SDR12C2    | H. sapiens      | elAKRGLNVVLSRTLEKLEAIETieR-TT-GRSVKIIQADFTK---DDIY---EHIKE     | 2p.0 | 3p.2 |
| SDR12C3    | H. sapiens      | ELASRGGLNIILISRNEEKLQVAKDAID-TY-KVETDIIVADFSSG--REIY---LPPIRE  |      |      |
| SDR12C-1C1 | C. intestinalis | KLAHEGLNIILVSRNKCDEEEAKfIET-AY-GVQTLVLRVQDLENL-TPFIT---KQIKQD  | 2p.1 |      |
| SDR12C-2C1 | C. intestinalis | alAARGQNIALISRNPEKLKTVATEleT-KY-NVQTKYLVIDFTQD---ESIY---EKIEE  | 2p.0 | 3p.2 |
| SDR12C-1C1 | S. purpuratus   | ELAHHGVMNIIILISRNEKLRKVASEies-FY-GVKTHVIAQDFSLG--SEIY---EDIST  |      | 2p.2 |
| SDR12C-2C1 | S. purpuratus   | LLVKHDMKVVGVCARNLDKlaIDGELKK-EE-GGSFPPIQCDLTQR--DQIYAMFEKIKT   | 1p.0 |      |
| SDR12C-1C1 | D. arizonae     | ELARQGLNLVLSIRSKEKLIIVATNEies-EH-KVKTKWIAVDFGKG--REAY---EQIEK  |      | 2p.2 |
| SDR12C-1C1 | D. ananassae    | elARRGLKLVLISRSLEKLNVAKEigD-KY-GVEVRVIDVDFTGG--AEIY---DKIQE    | 2p.0 | 3p.2 |
| SDR12C-1C1 | A. gambiae      | alARKGLNIILVSRSLKLEDVAKEiet-EF-KVRTMVIADAFDTKG--AEIY---EQIQE   | 2p.0 | 3p.2 |
| SDR12C-2C1 | A. gambiae      | QLASRGGLNVVLSRSTDKLVAVAEIES-KY-SVKTWIAVDFSSG--REIY---DHLRR     |      |      |
| SDR12C-3C1 | A. gambiae      | YLAAGMAIVLVARNAAKLNKVADEIRA-KH-GVETKVLVADFSKG--AEIY---PQLEK    |      |      |
| SDR12C-1C1 | A. mellifera    | ELATRKINLVLSRSLEKLEKTRNEIMQENP-TVEIKIIVADFSKG--KEIF---EKLAE    |      |      |
| SDR12C-1C1 | C. elegans      | ELARRGFNVLLVSRTQSKLEDTKKEILE-KYSSIEVTRTAADFDTNA-APSA---KDLLA   |      |      |
| SDR12C-1C1 | C. remanei      | ELARRGFNTYLVSRSTQSKLEQTKKEILQ-QYSNVVEVFATYDFDTNP-SPADY---QKLLD |      |      |
| SDR12C-1C1 | A. californica  | qlAAKGLNVVLSRTLSKLEDMAKeskS-KY-KVETKVIADFSR---EDIY---DGIKL     | 2p.0 | 3p.2 |
| SDR12C-2C1 | A. californica  | ELARRGLNVVLSISERNRLRSTQVLleG-RF-AVKVEYIVVDFASADQTEVY---NRIWE   |      | 2p.2 |

|            |                 |                                                                 |      |       |      |
|------------|-----------------|-----------------------------------------------------------------|------|-------|------|
| SDR12C1    | H. sapiens      | GLAGLEIGILvNNVGMSYE-YPEYFLDVPDL-DnvIKKMININILSVCKmT----QLVLP    | 4p.2 | 5p.0  | 6p.0 |
| SDR12C2    | H. sapiens      | KLAGLEIGILvNNVGMLPNLLPSHFLNA-PDEIQsL---IHCNITSVVkmT----QLILK    | 4p.2 | 5p.0  | 6p.0 |
| SDR12C3    | H. sapiens      | ALKDKDVGILVNNVGVFYP-YPQYFTQLSE---DKLWDIINVNIAAASLMV---HVVLP     |      |       |      |
| SDR12C-1C1 | C. intestinalis | RINELDIGILNNAGLH-E-SPKSFTeveI---SLHAMVQVNMNAVAVMT----AAVLP      | 3p.1 |       |      |
| SDR12C-2C1 | C. intestinalis | FLQGM DIGTLVNNVGMASP--LAFYLDTKNL-SQILPAIMKVNVMSVFkmT----QIVLP   |      |       | 4p.0 |
| SDR12C-1C1 | S. purpuratus   | KLQGMQIGILvNNVGAM-D-YPQLFLEMDA---DRIRQLININIGAATmmT----KLVLV    | 4p.2 |       | 4p.0 |
| SDR12C-2C1 | S. purpuratus   | HHGGV--DVCINNAGMAYP--SSLLDGTP---EEWQKSldlNVIALCLCT---KLSVQ      | 2p.0 |       |      |
| SDR12C-1C1 | D. arizonae     | ELAGIPVGILvNNVGRMYD-YPETFLDVPE---DTIWDILTINIGAVTMLT---RKIVP     | 2p.2 |       |      |
| SDR12C-1C1 | D. ananassae    | KTAGLDIGVLVNNVGISYS-HPEYFLDCYKADPQFLRNIVAANIHSVTHMS---ALFLP     |      |       |      |
| SDR12C-1C1 | A. gambiae      | QIENMEIGVLVNNVGMSYS-NPEYLLGLPDY-EKLINLLSCNILLSVTRMC---QLVMP     |      |       |      |
| SDR12C-2C1 | A. gambiae      | ELESVPVGILvNNVGANVD-YPDDLHIPE---DKLWQLININVGAVTMLT---RTVLP      | 2p.2 |       |      |
| SDR12C-1C1 | A. gambiae      | ALVPLDVGILvNNVGVSHD-TPMYVDEVPO---QTLWDLIHVNVAATLLC---NILAP      | 2p.2 |       |      |
| SDR12C-1C1 | A. mellifera    | QLKDIPIGILvNNVGMQYS-HPMYLEEVEPE---DDLWDIININIGATTMLT---RIVIG    | 2p.2 |       |      |
| SDR12C-1C1 | C. elegans      | TLNQVEIGVLINNVGMSYE-YPDVLHKVDGG-IERLANITINTLPPT1fLTQLSAGILP     |      |       | 3p.0 |
| SDR12C-1C1 | C. remanei      | KLNEVNIGILINNVGMFFE-YPDVLHEIQGG-IEFLANVAVVNILPPT11S---AGILP     |      |       | 3p.0 |
| SDR12C-1C1 | A. californica  | KMNGLDIGVLVNNVGCSYE-YPEYFGEVEEA--dfSQKMIHMNCTSVAmT----EIVLP     |      | 4p.0  | 5p.0 |
| SDR12C-2C1 | A. californica  | VLEDKDIGLlvNNVGVSYSR-CPDVLLSISR---EDLWRLIYVNI GAATmmT----HMLLP  | 3p.2 |       | 4p.0 |
|            |                 | ***                                                             |      |       |      |
|            |                 | + +                                                             |      |       |      |
| SDR12C1    | H. sapiens      | GMVERsK--GAILNISSGS---GMLPVPLLTIIYSATktFVDFFSQCLHEEYRSKGV----   | 7p.1 | 8p.0  |      |
| SDR12C2    | H. sapiens      | HMESrqK--GLILNISSGI---ALFPWPLYSMYSASkaFVCAFSKALQEEYKAKEV----    | 7p.1 | 8p.0  |      |
| SDR12C3    | H. sapiens      | GMVERKK--GAIVTISSGS---CKKPTQLAAFSASkaYLDHFSRALQY EYASKGI----    |      | 2p.0  |      |
| SDR12C-1C1 | C. intestinalis | GMLSRQR--GLIVNMSSGG---GMFPVPLISLYSSTkaFVDHFSQALHYEVASKNI----    |      | 4p.0  |      |
| SDR12C-2C1 | C. intestinalis | GMMERKR--GLILNISSAS---SLVPVNGFSVYGATKALVNYFSKCISRECEGHGI----    |      |       |      |
| SDR12C-1C1 | S. purpuratus   | QMVERKC--GVVNVVSSGT---SIHSPQLALYSACktYVDVFSQALEY EYKDYGI----    |      | 5p.0  |      |
| SDR12C-2C1 | S. purpuratus   | QMKEGVDGDGHILLNsmGGHRLIQGSNYLHFYAGTKHMKV KALTEGYRDEL RQKNS---K  | 3p.1 |       |      |
| SDR12C-1C1 | D. arizonae     | QMKAARR--GAIVNIGSGS---ELQPMPNMVYAASKKYVS YFTQALEQE LAEHNV----   |      |       |      |
| SDR12C-1C1 | D. ananassae    | GMIARKR--GVIINLSSTA---GVIPNPLLSVYSSTkaFVNKFSDDLQTEYKEHGI----    |      | 4p.0  |      |
| SDR12C-1C1 | A. gambiae      | GMVKRHA--GVVINISSLT---AVIPAPLLTVYAASKAFMDKFSEDLASEYAKHNI----    |      |       |      |
| SDR12C-2C1 | A. gambiae      | GMKKRGQ--GAIVNISSGS---ELQPLPYMTVYAATKVTVGRHPAHHGASkCHKRLVKIL    | 3p.2 |       |      |
| SDR12C-3C1 | A. gambiae      | SMKRRQR--GLIINVSSIA---SVGPSPCMATYAASKAYMTSFSIALRDEL RPFGV----   |      |       |      |
| SDR12C-1C1 | A. mellifera    | QMQRKGK--GAIVNVSSAS---GFIPPLPLMTVYSATKVYIISFTEALRAEY SKFGL----  |      |       |      |
| SDR12C-1C1 | C. elegans      | QMVARKA--GVIVNVGSSA---GANQMALWAVYSATkkyVSWLTA ILRKEYEHQGI----   |      | 4p.0  |      |
| SDR12C-1C1 | C. remanei      | QMVSRAK--GIIVNIGSAA---GAVPMAKWSVYSASkkyVSWLTATLRKEYGHQGI----    |      | 3p.0  |      |
| SDR12C-1C1 | A. californica  | AMVAKKR--GYVINIGSSA---GFKPAPLLALYSGTkgYVEMFTRSLYHEY IGRGV----   |      | 6p.0  |      |
| SDR12C-2C1 | A. californica  | GMVKQGR--GGLVVVSAGS---STQITPQMTVYSATkrYLDYFIQGVAYEYRHSGL----    |      | 5p.0  |      |
|            |                 | * *                                                             |      |       |      |
|            |                 | *                                                               |      |       |      |
| SDR12C1    | H. sapiens      | -FVqsVLPYFVATKLAKIRK-----PTLDKPSPETFVKSAIKTVGLQSR TNGYLIHALm    | 9p.0 | 10p.0 |      |
| SDR12C2    | H. sapiens      | -IIqvLTPYAVSTAMTKYLN-----TNVITKTADEFVKESLNYVTIGGETCGCLAHEI1     | 9p.0 | 10p.0 |      |
| SDR12C3    | H. sapiens      | -FVQSLIPFYVATSM TAPSNFLHR--CSWLVPSPKVYAHHAVSTLGISKR TTGYWSHSIQ  |      | 3p.0  |      |
| SDR12C-1C1 | C. intestinalis | -HVQSLTPMYISTRMTDYSTINS--NKFTPSVETVYVKHALPTLGRFRSNTGYFPHTIQ     |      | 5p.0  |      |
| SDR12C-2C1 | C. intestinalis | -TVqsVKPFFVSTNMVNNVK-----PNMLVMDADYYVNSLLGTIGKERESDGCWQHGLq     | 5p.0 | 6p.0  |      |
| SDR12C-1C1 | S. purpuratus   | -IVQTL LPSYVATKMADFGETMPR--SRFLIPSAAVYAKHAVASIGIANRTAGYWPHAVq   |      | 6p.0  |      |
| SDR12C-2C1 | S. purpuratus   | IRVsaLSPGLVESEFVV-----RLFGDDDPDKGR-----KVLQTTp cLKREDV          | 4p.0 | 5p.0  |      |
| SDR12C-1C1 | D. arizonae     | -TVQLVMPMFVITKMNEYSDSVMR--GGFLIPNARSFARS AVFTLGKTSMTTGFWTHGLQ   |      |       |      |
| SDR12C-1C1 | D. ananassae    | -LIQSVQPGFVATNM SKIRK-----ASVFAPSPETYVRSALSTLG IATQTAGYLP HALL  |      |       |      |
| SDR12C-1C1 | A. gambiae      | -VVQSVLP GPVATNM SKIRK-----SSWMACSPKVFANSAISTLGHTRKTTGYFP HALL  |      |       |      |
| SDR12C-2C1 | A. gambiae      | VVQGSNQTMPRFAvmN NFSTTIME--GGLFIPNAEMYAKFATFTLGKTKQTTGYWSHGIQ   | 4p.0 |       |      |
| SDR12C-3C1 | A. gambiae      | -EVQTVRPSFVHTNM TDFLVTGKEKWSKNMVRVDNFMAYAGCTIGKVDMTSGHWSHGLQ    |      |       |      |
| SDR12C-1C1 | A. mellifera    | -TIQHLSPFFVNTKMNAFSNLqv--SNILVPSATTYAKNAVN TLGKIDSSTGYWSHGIQ    | 4p.0 |       |      |
| SDR12C-1C1 | C. elegans      | -TVQTIAPMMVATKMSKVKR-----TSFFTPDGAVFAKSALNTVGNTSDTTGYITHQLQ     |      |       |      |
| SDR12C-1C1 | C. remanei      | -IFQTITPLMVATKMAGSPD-----TSFFCPTS DAFKSA LNTIGNSSDTTGYITHQLE    |      |       |      |
| SDR12C-1C1 | A. californica  | -TFqyVAPYFVVS KLSKFRR-----TSLMVSPN A FVRNALKTVGVQAYTTGYWAHDVq   | 7p.0 | 8p.0  |      |
| SDR12C-2C1 | A. californica  | -TFQCLMPFVYVNT RMTGFSDTLTR--SRGFPSAKQYASNAI LTLGRASLT TGYFYHTLq |      | 6p.0  |      |

|            |                 |                                                                    |      |
|------------|-----------------|--------------------------------------------------------------------|------|
| SDR12C1    | H. sapiens      | ----gSIISNLPSWI----YLKIVNMNKNSTRAHYLKKTCK--N-----                  |      |
| SDR12C2    | H. sapiens      | ----aGFLSLIPAWAFYS---GAFQRLLLTHYVAYLKLNTK--VR-----                 |      |
| SDR12C3    | H. sapiens      | ----fLFAQYMPPEWLWVW---GANILNRSRKEALSCTA-----                       |      |
| SDR12C-1C1 | C. intestinalis | ----cYFAMLCPRFLVVK----FSHRMLNLQKEAASIQKKAK-----                    |      |
| SDR12C-2C1 | C. intestinalis | ----gFFVRHMTGTFNALMKR-RMKTMQRNL--SLAGKAA--KKD---N-----             |      |
| SDR12C-1C1 | S. purpuratus   | ----sWIARQIPRNTWMW---GANILNSALRRQAEVRRKLKIVKSSSKGKLASKSPTAESASKSV  |      |
| SDR12C-2C1 | S. purpuratus   | AELVVMVMQQPPNVqiHD---ILVRDQVQK-----                                | 6p.0 |
| SDR12C-1C1 | D. arizonae     | ----yFFMKMAPQHLMRL---IGHQLTRRLRLEGLSQKKLT-----                     |      |
| SDR12C-1C1 | D. ananassae    | ----QLIIHFTEAVFGDQFARNLVLNILGTRKRALRRLAK--EQ-----                  |      |
| SDR12C-1C1 | A. gambiae      | ----ELSINALSFV-SPRLAEKITINTMQNIRARAMKKSTA--RSSAPADSTAVLTA--SS----- |      |
| SDR12C-2C1 | A. gambiae      | ----YGVMKLVPEWIRTM---IGGMMNKQFRKEYYDQQQKPAQAS-----                 |      |
| SDR12C-3C1 | A. gambiae      | ----LAGLSLVPEVVRVY----IFGLINKKLREQFHVQNNNKKR-----                  |      |
| SDR12C-1C1 | A. mellifera    | ----KIIVLLVPIEIRTK---LAMILNMIFRKEYFKQKRNI-----                     |      |
| SDR12C-1C1 | C. elegans      | ----LELMDLIPTFIRDK---ILTNMSVGTRAAALRKKER--EAKSQ-----               |      |
| SDR12C-1C1 | C. remanei      | ----YEMMNLMPFIIDK---AVIRSSAKLREAAALAKKEE--KLLS-----                |      |
| SDR12C-1C1 | A. californica  | ----rFVHSFMPAS-----MSMSMMQGARKKALKKKAA--AKSQ-----                  |      |
| SDR12C-2C1 | A. californica  | ----lWLAWMLPSGLWMW---GSEKLNNALRREAQNRALRRVHKSASDETMVSVAMTPA-----   |      |

Figure S29. Alignment of the invertebrate orthologs of the human SDR12C family variants. For further details see Fig. S25 and Table S31.

\* symbol marks the position of identical amino acid residues of the aligned SDR protein sequences.

|            |                 |                                                              |
|------------|-----------------|--------------------------------------------------------------|
| SDR16C1    | H. sapiens      | -----MVWKRILGALVMF                                           |
| SDR16C2    | H. sapiens      | -----MKFLLDILL                                               |
| SDR16C3    | H. sapiens      | -----MNIILEILL                                               |
| SDR16C4    | H. sapiens      | -----MNIVVEFFVV                                              |
| SDR16C5    | H. sapiens      | -----MSFNLQSSKKLFIF                                          |
| SDR16C-1C1 | C. intestinalis | -----MDFQDVGNLLWA                                            |
| SDR16C-1C1 | S. purpuratus   | -----MIFIDFLDLVWM                                            |
| SDR16C-1C2 | S. purpuratus   | -----MENPIVIFLWL                                             |
| SDR16C-1C3 | S. purpuratus   | -----MSDA-----SDREHSSTAMSI LEFVGELMIL                        |
| SDR16C-1C1 | D. melanogaster | MEKNNNELSAEDAQILANGHAHPNANGVVHQKTEPVAPAADGWRQVLWNTWDAFADVAWF |
| SDR16C-1C1 | A. gambiae      | -----MDVIVF                                                  |
| SDR16C-1C1 | A. mellifera    | -----MQLAEWIIILY-----DFLLF                                   |
| SDR16C-1C1 | C. elegans      | -----MFDIILEIVIL                                             |
| SDR16C-1C2 | C. elegans      | -----MQDI-----LESVVV                                         |
| SDR16C-1C3 | C. elegans      | -----MDRA-----LDFVKM                                         |
| SDR16C-1C1 | A. californica  | -----MSLF-----LEFLVV                                         |
| SDR16C-1C2 | A. californica  | -----MDMQIIFDGITA                                            |

|           |                 |                                                                |      |
|-----------|-----------------|----------------------------------------------------------------|------|
| SDR16C1   | H. sapiens      | PLQMIYLVVKAAGVGLVP---AKLRDLSRENVLITGGGRGIGRQLAREFAERGARKiVLW   | 1p.0 |
| SDR16C5   | H. sapiens      | LGKSLFSLLEAMIFALLP---KPRKNVAGEIVLITGAGSGLGRLLALQFARLGSV-LVLW   |      |
| SDR16C2   | H. sapiens      | LPLLIIVCSLESFVKLFIP---KRRKSVTGEIVLITGAGHGIGRLTAYEFAKLKSK-LVLW  |      |
| SDR16C3   | H. sapiens      | LITIIYSYLESIVKFFIP---QRRKSVAGEIVLITGAGHGIGRQTTEYFAKRQSI-LVLW   |      |
| SDR16C4   | H. sapiens      | TFKVLWAFVLAARWLVR---PKEKSVAGQVCLITGAGSGLGRLEFAEFARRAL-LVLW     |      |
| SDR16-1C1 | C. intestinalis | LLVSLYYCLEAIVMFFVP---TGRKVVRGQTVLITGAGSGigQRLSVEFAKLGCT-IVGV   | 1p.0 |
| SDR16-1C1 | S. purpuratus   | LLSVLYYIGELVLCVPTSF-RKNSIEGELVLTGAGSGIGRLQAIFAAAGCD-VVLW       |      |
| SDR16-1C2 | S. purpuratus   | IAKICFYNFVGFDINIPGSWKPKQDVSKIEVLVTGGGMGIGRLMSLTFAKLGAT-VIIW    |      |
| SDR16-1C3 | S. purpuratus   | HLQVLLVSMEAFLEKWLIPSSL-RSKSLEGETMLITGAGSGIGRLFAKFAALgVVR-VVLW  | 1p.2 |
| SDR16-1C1 | D. melanogaster | IICCIGYILqd--LYYIAFGY-PEKELNTDIALITGGGNGLGRLLAERLGKMGTK-VVIW   | 1p.1 |
| SDR16-1C1 | A. gambiae      | LLTSLGYILqa--FYYQIFGV-PKKNLNGEIALVTGGGGGLGRLLALRLIKLGAK-VVLW   | 1p.0 |
| SDR16-1C1 | A. mellifera    | MGMALIYISEAIIILTFIPKRY-RIKSVKGEIALVTGGAGGIGRLIAIKLAKLGAH-VVIW  |      |
| SDR16-1C1 | C. elegans      | LFNLLIQNLISLIKALPYSLLPKKDLYRKVLTITGAGNGLGKLLAQKFAARGAT-LILW    |      |
| SDR16-1C2 | C. elegans      | TLHAICLLIISTIRNCFPMGWLLRKDVrgQTVLITGSGSGLGRLLMAFEFGKLGAR-LVLW  | 1p.2 |
| SDR16-1C3 | C. elegans      | VVGTLFFIVLNFFKNFLPNGVLPKRSVEGKKVLTITGSGSGLGRLLMALEFAKLGAE-VVIW |      |
| SDR16-1C1 | A. californica  | LVNAIWLWLVAIYKALVPVSMQWTKDMSKDTVLVTGAGSGIGRLMSLKFAEMGCR-LVIW   |      |
| SDR16-1C2 | A. californica  | VRNIFAAFFLSWIRFFFS-G-YKKKSVTEEIVLITGAGSGMGQGMAMEFAKLGAV-VVLW   |      |

|           |                 |                                                           |      |
|-----------|-----------------|-----------------------------------------------------------|------|
| SDR16C1   | H. sapiens      | GRTEKCLKETTEEIRQ-----MGTECHYFICDVGNREEVY                  |      |
| SDR16C2   | H. sapiens      | DINKhGLEETAACKG-----LGAKVHTFVVDCSNREDIY                   | 1p.0 |
| SDR16C3   | H. sapiens      | DINkrGVEETAACERK-----LGVTAHAYVVDCSNREEIY                  | 1p.0 |
| SDR16C4   | H. sapiens      | DINTQSNEETAGMVRHIYRDLEAADAALqaGNGEELPHCNLQVFTYTCDVGKRENVY | 1p.2 |
| SDR16C5   | H. sapiens      | DINKEGNEETCKMA-REA-----GATRVHAYTCDSCSQKEGVY               |      |
| SDR16-1C1 | C. intestinalis | DISIVGLGETKKKLEDLN-----MKVKYHCYKCDLSDREQIY                |      |
| SDR16-1C1 | S. purpuratus   | DINTkgIEETAQLVRK-----TGRKAWYCICDVSKREKVY                  | 1p.2 |
| SDR16-1C2 | S. purpuratus   | DINKETAQGVVKEIre-----AGGKAYSIVVDCCDNEAVY                  | 1p.1 |
| SDR16-1C3 | S. purpuratus   | DINASDVEETAKLVRV-----NGGKAWWYCDVTEMAKVN                   |      |
| SDR16-1C1 | D. melanogaster | DINKkgIAETVQIVVE-----AGGYCKGYVVDISKKEEVY                  | 2p.2 |
| SDR16-1C1 | A. gambiae      | DINQegLDDSVKLIQS-----LGGLCKGYKVDISNKEEVY                  | 2p.2 |
| SDR16-1C1 | A. mellifera    | DINRIgLESTVQEIRH-----NGGKCWGYCDITNKKEIY                   | 1p.2 |
| SDR16-1C1 | C. elegans      | DINLQSVDELKNEIRG-----NQGeaHSYEVNLCDPGKIA                  | 1p.0 |
| SDR16-1C2 | C. elegans      | DINEQGNKETLKELEA-----MGVeaKAYTVDLSEYKEIN                  | 2p.0 |
| SDR16-1C3 | C. elegans      | DVNKDGAEETKNQVVK-----AGGKASTFVVDLSQYKDIH                  |      |
| SDR16-1C1 | A. californica  | DINEEGNLETARQIEA-----KGSKVKAYTVDLNKSESIY                  |      |
| SDR16-1C2 | A. californica  | DVNNKGLEETVKMVKA-----VEGVCHTYICDVsdRAAVR                  | 1p.1 |

|           |                 |                                                                                                      |      |      |
|-----------|-----------------|------------------------------------------------------------------------------------------------------|------|------|
| SDR16C1   | H. sapiens      | QTAKAVRE <sup>kv</sup> GDITILVNNAAVVHGKSLMDSDDDALLKSHINTLGQF <sup>wt</sup> TKAFLPRMLE                | 2p.0 | 3p.0 |
| SDR16C2   | H. sapiens      | SSAK <sup>kv</sup> KAEIGDVSILVNNAAGVVYTSDLFATQDPQIEKTFEVNVLAHF <sup>wt</sup> TKAFLPAMTK              | 2p.0 | 3p.0 |
| SDR16C3   | H. sapiens      | RSLN <sup>qv</sup> KKEVGDTVILVNNAAGTVYSDLLSTKDEITKTTFEVNLAHF <sup>wt</sup> TKALLPSMME                | 2p.0 | 3p.0 |
| SDR16C4   | H. sapiens      | LTAERV <sup>kv</sup> KEVGESVSVLNNAAGVVSGHLLLECPDELIERTMMVNCHAHF <sup>wt</sup> TKAFLPTMLE             |      | 2p.0 |
| SDR16C5   | H. sapiens      | RVAD <sup>qv</sup> KKEVGDVSLINNAGIVTGKKFLDCPDELMEKSFVDNFKAHL <sup>wt</sup> YKAFLPAMIA                | 1p.0 | 2p.0 |
| SDR16-1C1 | C. intestinalis | DVAD <sup>kv</sup> KSDVGDDVILINNAGIVTGKRLMDCPDKLMIKTMDVNAVAHF <sup>wt</sup> IKAFLPSMLE               | 2p.0 | 3p.0 |
| SDR16-1C1 | S. purpuratus   | EAAAKVKREAGEVTTILVNNAAGIAGHKFINLTDDAIQKTMEVNALAHAF <sup>wt</sup> LKAFLPDMMK                          |      | 2p.0 |
| SDR16-1C3 | S. purpuratus   | ETAQVR <sup>kv</sup> EEVGDTVMLVNNAAGIVTGKYFQDLNEEDFHKTNLVNSLAHF <sup>wt</sup> LKAFLPNMLE             |      | 2p.0 |
| SDR16-1C2 | S. purpuratus   | RTADKVREDIGHVTILINNAGIVSGKKLLQCPDSLKKTMDLNINAHF <sup>wt</sup> LKAFLPHMLE                             |      | 2p.0 |
| SDR16-1C1 | D. melanogaster | KAADVIRDEVG <sup>di</sup> TLLINNAGVVSGHLLLDTPDHLIERSFNVNVAHF <sup>wt</sup> TKAFLPKMIE                | 3p.0 | 4p.0 |
| SDR16-1C1 | A. gambiae      | KYAKIIQEEIG <sup>dv</sup> TLLFNNAAGVVSGRALLDTPDHLIERSFSVNVLAHF <sup>wt</sup> TKAFLPAMLK              | 3p.0 | 4p.0 |
| SDR16-1C1 | A. mellifera    | RMAKIVQIEVG <sup>sv</sup> TLLINNAGVVSGKIFWELSDVEIDRTYKVNILSHY <sup>wt</sup> NKTFLKDMMK               | 2p.0 | 3p.0 |
| SDR16-1C1 | C. elegans      | QVGQQVINDIGKVDILVNNAAGI <sup>ata</sup> KMILDSSENEINRSFDVNVKAHF <sup>yt</sup> VQQFLPAMLK              | 2p.2 | 3p.0 |
| SDR16-1C2 | C. elegans      | RTADLVKSEVGKVDILVNNAAGIV <sup>tg</sup> KKLLQCPDELMVKT <sup>sv</sup> VNTNALF <sup>ft</sup> TKNFLPGMLE | 3p.2 | 4p.0 |
| SDR16-1C3 | C. elegans      | KVAKETKEAVGDIDILINNAGIV <sup>tg</sup> KKLFCPDELMEKTMAVNTNALF <sup>yt</sup> AKNFLPSMLE                | 1p.2 | 2p.0 |
| SDR16-1C1 | A. californica  | ETAA <sup>kv</sup> KADVGNVDVLVNNAAGIVTGRKFLDCPDGLVEKTMENVNTNAHF <sup>wt</sup> TKSFLPEMME             | 1p.0 | 2p.0 |
| SDR16-1C2 | A. californica  | ETADKVRSEVGDTVMLVNSAGVVAGRRLLDLTDQIEHTFGVNLMPGI <sup>wt</sup> TKEFLPSMLE                             |      | 2p.0 |

\* \* \* \*

|           |                 |                                                                                                        |      |  |
|-----------|-----------------|--------------------------------------------------------------------------------------------------------|------|--|
| SDR16C1   | H. sapiens      | LQNGHIVCLNSVLALSIPAIDYCTSKASAFAMESLTGLGL--DCPGVSATTVLPFHT                                              |      |  |
| SDR16C2   | H. sapiens      | NNHGHIVTVASAAGHVSVPFLLAY <sup>cs</sup> SKFAAVGFHKTLTDELAALQITGVKTTCLCPNFV                              | 4p.1 |  |
| SDR16C3   | H. sapiens      | RNHGHIVTVASVCGHEGIPYLIPI <sup>cs</sup> SKFAAVGFHRLTSELQALGKTGIKTSCLCPVFV                               | 4p.1 |  |
| SDR16C4   | H. sapiens      | INHGHIVTVASSLGLFSTAGV <sup>edy</sup> CASKFGVVGFFHESLSHELKAAEKDGIKTTLVCPYLV                             | 3p.0 |  |
| SDR16C5   | H. sapiens      | NDHGHILVCISSAGLSGVNGL <sup>ady</sup> CASKFAAFGFAESVFVET <sup>fv</sup> QKQKGIKTTIVCPFFI                 | 3p.2 |  |
| SDR16-1C1 | C. intestinalis | KNCGHIVTIIASGAGVFGLPALLDYCA <sup>sk</sup> FAAVGLSEALDLELWQQRKDGIVTVVCPYYI                              | 4p.1 |  |
| SDR16-1C1 | S. purpuratus   | RDHGHIVTIIASIMGEISAAGMSEYCMSKFASVGLHEAVLRETRAAGKLGINFTLVNPMYI                                          |      |  |
| SDR16-1C2 | S. purpuratus   | KNHGHIVTIIASLAGHLGVSLVDYCA <sup>sk</sup> FAAVGLDDALYHELQYSGKTGVKCTVVCIFYI                              |      |  |
| SDR16-1C3 | S. purpuratus   | RNHGHIVTVASIMGEIVVPLSDYCMSKFAAVALHESLLREARAQKGDGVHFTLINPYKI                                            |      |  |
| SDR16-1C1 | D. melanogaster | NDRGHITIIASLAGHVGISKLV <sup>dy</sup> CASK <sup>fa</sup> AVGFDEALRLELEVLGHTNIRTTTICPFFI                 | 5p.0 |  |
| SDR16-1C1 | A. gambiae      | NDHGHITIIASLAGHVGISKLV <sup>dy</sup> CSSKFA <sup>av</sup> GFDEALRLELEHLRAQGVFTTVICPYFI                 | 5p.0 |  |
| SDR16-1C1 | A. mellifera    | NNHGHIVTVASVAGLLGTGYKCTDYSATKFAAIGYHESLFT <sup>kt</sup> EL <sup>kt</sup> HGYDGIHATLICPYFI              | 4p.0 |  |
| SDR16-1C1 | C. elegans      | DNNGHIVTIIASAAGKMSSG <sup>la</sup> DYSSSTKHAAGVGFHDSLVAEIMESEKNGVKTTLVCPYYV                            | 4p.0 |  |
| SDR16-1C2 | C. elegans      | SNKGHIVTIIASMAGKCGVAGL <sup>lv</sup> DYCA <sup>sk</sup> HGAVGFNDLSAELYALK-KDVKT <sup>sv</sup> TVCPYYI  | 5p.0 |  |
| SDR16-1C3 | C. elegans      | KDNGLHVTIIASMAGTGCVLVDYCA <sup>sk</sup> HGAIGCHDSIAMEILAQKKYGVNTTLVCPFFI                               |      |  |
| SDR16-1C1 | A. californica  | RNHGHIVTIIASSAGLFGVATLADYCA <sup>sk</sup> FGAVGFDESI <sup>rs</sup> EMLKYRKTGVHTTVCPFFI                 | 3p.1 |  |
| SDR16-1C2 | A. californica  | NNQGHIVNMASSCGLIGLSHLTDY <sup>sa</sup> SKFGVVGFTQTLN <sup>ye</sup> IEIHFSGH <sup>dg</sup> VHTTLVCPSEFV | 3p.1 |  |

\*\* \* \* \*

|           |                 |                                                                                                                                             |      |      |
|-----------|-----------------|---------------------------------------------------------------------------------------------------------------------------------------------|------|------|
| SDR16C1   | H. sapiens      | S-TEMFQGM <sup>rv</sup> Rf--PNLFPPLPKETVARRTVEAVQLNQALLLLPWTMHALVILK <sup>sil</sup> LPQ                                                     | 4p.1 | 5p.1 |
| SDR16C2   | H. sapiens      | N-TGFIKNPST <sup>sl</sup> -----GPTLEPEE <sup>vv</sup> NRLMHGILTEQKMI <sup>f</sup> IPSSIAFLTTLE <sup>ril</sup> LP                            | 5p.1 | 6p.1 |
| SDR16C3   | H. sapiens      | N-TGFTKNPST <sup>rl</sup> -----WPVLETDEVVRS <sup>ld</sup> GILTNKKMIFVPSYINIFLRLQ <sup>kfl</sup> LP                                          | 5p.1 | 6p.1 |
| SDR16C4   | H. sapiens      | D-TGMFRGCR <sup>ir</sup> keTEPFLPPLKPDYCVQKAMKAILTDQPMICTPRLMYIVTFMK <sup>sil</sup> LPF                                                     | 4p.1 | 5p.1 |
| SDR16C5   | H. sapiens      | K-TGMFEGCT <sup>tg</sup> --PSLLPILEPKYAVEKIVEAILQEKMYLYMPKLLYFMMFLK <sup>sfl</sup> LPL                                                      | 4p.1 | 5p.1 |
| SDR16-1C1 | C. intestinalis | D-TGMFKGVST <sup>pi</sup> -----LPTLKP <sup>ey</sup> AVNRMVDAILKNKRM <sup>ll</sup> LLPGFSYVYALK <sup>gfl</sup> LPS                           | 5p.1 | 6p.1 |
| SDR16-1C1 | S. purpuratus   | N-TGMFAGTKI <sup>ry</sup> --EMIVPTLEPEYVAGKVVEAVQTRTALV <sup>rt</sup> PVLLHLMVLLK <sup>dil</sup> LPQ                                        | 3p.1 | 4p.1 |
| SDR16-1C2 | S. purpuratus   | K-TGMFDGVKA <sup>kr</sup> --SIMIDLMEPEYAVEQIILAIRT <sup>n</sup> Q <sup>rv</sup> VLILPKSLYFFPGLKNLWHP                                        | 3p.1 |      |
| SDR16-1C3 | S. purpuratus   | D-TGMFNGATIKK <sup>sa</sup> QLLFP <sup>tl</sup> LKPEFVADKVVEAVQTN <sup>rd</sup> V <sup>rt</sup> PFIFNMV <sup>vv</sup> LT <sup>km</sup> LPL  | 3p.1 | 4p.1 |
| SDR16-1C1 | D. melanogaster | QATGMFDDVNA <sup>rw</sup> -----VPTL <sup>ds</sup> NDVADKII <sup>eg</sup> VQKNEKYV <sup>ii</sup> IPGYLR <sup>lm</sup> LAIK <sup>wm</sup> FPW | 6p.1 | 7p.1 |
| SDR16-1C1 | A. gambiae      | QSTGMFDDVNS <sup>rw</sup> -----VPTL <sup>ds</sup> NDVADKII <sup>eg</sup> VQKNEKYV <sup>ii</sup> IPGYLR <sup>lm</sup> LAIK <sup>wm</sup> FPW | 6p.1 | 7p.1 |
| SDR16-1C1 | A. mellifera    | N-TGMFHGVEP <sup>rl</sup> -----MPMLEPEYVAQEVVSGILLN <sup>qv</sup> VVVLPGSV <sup>rv</sup> FLPLK <sup>cl</sup> LPA                            | 5p.1 | 6p.1 |
| SDR16-1C1 | C. elegans      | H-TSMF <sup>dat</sup> GAAT <sup>rf</sup> PWIFPILDTDYV <sup>vv</sup> QKIFEAIETEQEFLVTP <sup>raf</sup> YLVFAGI <sup>qil</sup> LPY             | 5p.1 | 6p.1 |
| SDR16-1C2 | C. elegans      | N-TGMFDGIATK--WPTLLPILSP <sup>ey</sup> VVD <sup>ci</sup> MEAVLTDRAFLAIPKFSYIFIAL <sup>agl</sup> LPT                                         |      | 6p.1 |
| SDR16-1C3 | C. elegans      | D-TGMFHGVTT <sup>kc</sup> --PALFPILEANYAVECIVEAILTNR <sup>pl</sup> LLCMPKASYLILALIGLLPI                                                     | 3p.1 |      |
| SDR16-1C1 | A. californica  | K-TGMFEGAKS <sup>rf</sup> --PWLLP <sup>le</sup> PEYAADKIMDAVRTN <sup>q</sup> PMLCAPRVLYLLYFLR <sup>gv</sup> FPS                             | 4p.1 | 5p.1 |
| SDR16-1C2 | A. californica  | T-TGMFQGCRMA <sup>af</sup> --PLLIPELEQNATVQIRIMHAILTNQSEVYIPRLVYFMNSLK <sup>ti</sup> IPV                                                    | 4p.1 | 5p.1 |



|           |                 |                                                              |  |   |
|-----------|-----------------|--------------------------------------------------------------|--|---|
|           |                 | *                                                            |  | * |
| SDR16C1   | H. sapiens      | AALEEIHKFSGT---YTCMNTFKGRT-----                              |  |   |
| SDR16C2   | H. sapiens      | RFLAVLKRKISV---K--FDAVIGYKMKAQ-----                          |  |   |
| SDR16C3   | H. sapiens      | RASAILNRMQNI---Q--FEAVVGHKIKMK-----                          |  |   |
| SDR16C4   | H. sapiens      | EAVVCMYRFLGA---DKCMYPFIAQRKQATNNNEA----KNGI-----             |  |   |
| SDR16C5   | H. sapiens      | KTGLLIADYLG I---LHAMDGFVDQKKKL-----                          |  |   |
| SDR16-1C1 | C. intestinalis | KAMYVMGEACGI---NTSMDTFIGRKKE-----                            |  |   |
| SDR16-1C1 | S. purpuratus   | KAIFSMEDFFET---AKAMDNFVGRRHVKSS-----                         |  |   |
| SDR16-1C2 | S. purpuratus   | KAVQAAYDMNGI---QDMNNTFTGRTKED-----                           |  |   |
| SDR16-1C3 | S. purpuratus   | KANLLEDDFLEN---EKVMKNFVGRRGQKAVEQTG----AKIE-----             |  |   |
| SDR16-1C1 | D. melanogaster | GCVGGLLKRLVPDASPHGLPSSIAVPTVPL---NSNSKLTAADIAALDAELSSVTLPAKP |  |   |
| SDR16-1C1 | A. gambiae      | GCNSGFLRRLVPDAAPQHTITPLNNS-----                              |  |   |
| SDR16-1C1 | A. mellifera    | KLCWALMYNIIR--GPQGMMMFKGREEVQVLKNNNNITMSKGTIH-----           |  |   |
| SDR16-1C1 | C. elegans      | KAQAMVAQFFGL---VQNLERFHK-----                                |  |   |
| SDR16-1C2 | C. elegans      | EVLNLYGDHFGI---THSMDFKGRQSRQA-----                           |  |   |
| SDR16-1C3 | C. elegans      | ESQVMMADFFGT---NESMNDFKGRQKND-----                           |  |   |
| SDR16-1C1 | A. californica  | TVADVLAEFI G I---SASMDDFVGR TKPKTA-----                      |  |   |
| SDR16-1C2 | A. californica  | SAMLEVIRFFRA---DKFMHSFVGRKDELSLPAK----EE-----                |  |   |
|           |                 |                                                              |  |   |
| SDR16C1   | H. sapiens      | -----                                                        |  |   |
| SDR16C2   | H. sapiens      | -----                                                        |  |   |
| SDR16C3   | H. sapiens      | -----                                                        |  |   |
| SDR16C4   | H. sapiens      | -----                                                        |  |   |
| SDR16C5   | H. sapiens      | -----                                                        |  |   |
| SDR16-1C1 | C. intestinalis | -----                                                        |  |   |
| SDR16-1C1 | S. purpuratus   | -----                                                        |  |   |
| SDR16-1C2 | S. purpuratus   | -----                                                        |  |   |
| SDR16-1C3 | S. purpuratus   | -----                                                        |  |   |
| SDR16-1C1 | D. melanogaster | PSMLIQRTPSLGERVL                                             |  |   |
| SDR16-1C1 | A. gambiae      | -----                                                        |  |   |
| SDR16-1C1 | A. mellifera    | -----                                                        |  |   |
| SDR16-1C1 | C. elegans      | -----                                                        |  |   |
| SDR16-1C2 | C. elegans      | -----                                                        |  |   |
| SDR16-1C3 | C. elegans      | -----                                                        |  |   |
| SDR16-1C1 | A. californica  | -----                                                        |  |   |
| SDR16-1C2 | A. californica  | -----                                                        |  |   |

Figure S30. Alignment of the invertebrate orthologs of the human SDR16C family variants. For further details see Fig. S25 and Table S32.

\* symbol marks the position of identical amino acid residues of the aligned SDR protein sequences.

|           |                 |                                                                |      |      |
|-----------|-----------------|----------------------------------------------------------------|------|------|
|           |                 | x x x                                                          |      |      |
| SDR21C1   | H. sapiens      | MSSGIIHVALVTGGNKGIGLAIVRDLCLRF--SGDVVLTARDVTRGQAAVQQQLQAEGLSPR |      |      |
| SDR21C2   | H. sapiens      | MSSCSRVALVTGANRGIGLAIARELCRQF--SGDVVLTARDVARGQAAVQQQLQAEGLSPR  |      |      |
| SDR21-1C1 | C. intestinalis | -MSTTRVAIVSGSNRGLGLAIVRGLCKDF--KGDVYLCRSRSEASGKEAVKSLETEGLCPK  |      |      |
| SDR21-1C1 | S. purpuratus   | MSSRKTIAlvTGANKGIGFGIVRALCKELGERGVVYLASRDEGRGEKAVQELKGEGLNPR   | 1p.0 |      |
| SDR21-1C1 | M. rotundata    | ---MTRVAvvTGGNKGIGFAIVKALCKQF--DGVVYLTARDVNRGQNAVQLEDDQLTPK    | 1p.2 |      |
| SDR21-1C2 | A. californica  | -MSLKRVAvvTGSNKGIGLAIVRGLCKDF--QGDVVLtaRDEGRGRAAVQVLEKEGFSPK   | 1p.0 | 2p.2 |
|           |                 | * * * * *                                                      |      |      |
| SDR21C1   | H. sapiens      | FHQLDIDDLQSI RALRDFLRKEYGGDLVLVNNAGIAFkvADPTPFHIQAEVTMKTNFFGT  | 1p.2 |      |
| SDR21C2   | H. sapiens      | FHQLDIDDLQSI RALRDFLRKEYGGDLVLVNNAAVAFksDDPMFEDIKAEMTLKTNFFAT  | 1p.2 |      |
| SDR21-1C1 | C. intestinalis | YHQLDICDENSVL SLKEFLVKNYGGDLVLVNNAGFAYKSASTEPFGKQARDTVDVNYGT   |      |      |
| SDR21-1C1 | S. purpuratus   | CIQLDICNNDHISKVADYFRDITYGGDLILVNNAGIAFkaAATEPDSIQAPVTVETNVFAT  | 2p.0 |      |
| SDR21-1C1 | M. rotundata    | FHQLDVTDENSISTFRDYLQKTYGGDLILVNNAAIAFkmaATEPFSVQAEETVRVNYFAL   | 2p.0 |      |
| SDR21-1C2 | A. californica  | FHLLDISDHQSI VIKLRDFLKETYQGLDVLVNNAAILYnedSTLPFPDQARETIKVNYNN  | 3p.0 |      |
|           |                 | ** * * * *                                                     |      |      |
| SDR21C1   | H. sapiens      | RDVCTELLPLIKPqgRVVNVSSIMSVRALKSCSPELQQKFRSETITEEELVGLMNKFVED   | 2p.2 |      |
| SDR21C2   | H. sapiens      | RNMCNELLPI MKPhgRVVNISSLQCLRAFENCSEDLQERFHSETLTGEDLVLMKKFVED   | 2p.2 |      |
| SDR21-1C1 | C. intestinalis | LKISNILLPI MKKGRVVNVSSFVSLMSIKKCSEELQSIFRSQTITEEELSSKMEEFVAH   |      |      |
| SDR21-1C1 | S. purpuratus   | LRLCRALIPLIRSHGrvVTVASQAGSSIYGRGPDQLQKRFKTVT-SEQGVIDL MNEFI sa | 3p.1 | 4p.1 |
| SDR21-1C1 | M. rotundata    | RKVCTLLYPLLKPHARVVHVSSSSGRLSL-IPSES LRKRFSDPNLTEEELDNIMHEFVnt  |      | 3p.1 |
| SDR21-1C2 | A. californica  | LDVCEVLFPLLRPHArvCNMSSLANAIAFKVLSPELRTKFLNPQITMPEVSSSLMTQFVda  | 4p.1 | 5p.1 |
|           |                 | * * * * *                                                      |      |      |
|           |                 | + +                                                            |      |      |
| SDR21C1   | H. sapiens      | TKKGVHQKEGWP---SSAYGVTKIGVTVLSRIHARKLSEQRKGDKILLNACCPGWVRTDM   |      |      |
| SDR21C2   | H. sapiens      | TKNEVHEREGWP---NSPYGVSKLGVTVLSRILARRLDEKRRKADRILVNACCPGPVKTDM  |      |      |
| SDR21-1C1 | C. intestinalis | ARAGDHVTHGWP---DTAYGVSKVGVSVMTWIQARQMR-MRGLDDVLINACCPGWVRTDM   |      |      |
| SDR21-1C1 | S. purpuratus   | AKEEKKKELGWG---SSNYGVSKLGVIALTRIQQGDI IKDSSREDILINscCPGYVDTDM  | 5p.0 |      |
| SDR21-1C1 | M. rotundata    | AKTNTHLENGWS---NSAYVASKVGVSAALARVHQMFN-SDSREDLAVNAVHPGYVDTDM   |      |      |
| SDR21-1C2 | A. californica  | AQENKHEEQGF LSRVSSYGISKIGLTLM SAIQQRDFD-AQGAVDIVVNscSPGYVNTDM  | 6p.0 |      |
|           |                 | * * * *                                                        |      |      |
| SDR21C1   | H. sapiens      | AGPKATKSPEEGAETPVYLALLP PDAEGPHGQFVSEKRVEQW----                |      |      |
| SDR21C2   | H. sapiens      | DGKDSIRTVEEGAETPVYLALLP PDATEPQGQLVHDKVVQNW----                |      |      |
| SDR21-1C1 | C. intestinalis | AGPKATKSPDEGAITPLYCALLPEGAKEPHGKFLSDKTIKEW----                 |      |      |
| SDR21-1C1 | S. purpuratus   | SSHKGPLTIDQGAVTPVYLALLP GGC SHQGLFFYQKAVKDFW----               |      |      |
| SDR21-1C1 | M. rotundata    | TSHKGTLTDPQGAVAPVFAALLP ENTDIKGYIWFDKSLVEWTKDA                 |      |      |
| SDR21-1C2 | A. californica  | TQKGKPLTVEegAVTPLYLCLLP PDVSGPRGLFIREKAIYDWT TT-               | 7p.2 |      |
|           |                 | * * * *                                                        |      |      |

Figure S31. Alignment of the invertebrate orthologs of the human SDR21C family variants. For further details see Fig. S25 and Table S33.

\* symbol marks the position of identical amino acid residues of the aligned SDR protein sequences.

|           |                 |                                                                 |                                     |      |      |
|-----------|-----------------|-----------------------------------------------------------------|-------------------------------------|------|------|
| SDR25C1   | H. sapiens      |                                                                 | -----MLSAVARGY-----QGFHPCA--RLSVRMS |      |      |
| SDR25C2   | H. sapiens      |                                                                 | -----MHKAGLLGLCARAWNSVRMA           |      |      |
| SDR25C1C1 | S. purpuratus   |                                                                 | -----MFSLTRLLSVGRSINHFRMA           |      |      |
| SDR25-1C1 | D. melanogaster | MLHLSKQLVVRAPKIRLNASAVSGSQSSSFQNSNNYSRKLVGPNLQCHKRLLSSSS-Q      |                                     |      |      |
| SDR25-1C1 | A. mellifera    |                                                                 | -----MLRS-----SINRSMQQIN-R          |      |      |
| SDR25-1C1 | C. elegans      |                                                                 | -----                               |      |      |
| SDR25-1C1 | A. californica  |                                                                 | -----                               |      |      |
| <br>      |                 |                                                                 |                                     |      |      |
|           |                 | x x x                                                           |                                     |      |      |
| SDR25C1   | H. sapiens      | STGIDRKGVLANRVAVVTGSTsgigFAIARRLRADGAHVVISRRKQONVDRAAKLQGEG     | 1p.1                                |      |      |
| SDR25C2   | H. sapiens      | SSGMTTRDPLANKVALVTASTdgiGFAIARRLAQDGAHVVSRRKQONVDQAVATLQGEG     | 1p.1                                |      |      |
| SDR25-1C1 | S. purpuratus   | SAAATGSRRLLEGKVAVVTASTEGIGYAI AKRLGEEGAHVVISRRKQAHVDHALKTLEKAN  |                                     |      |      |
| SDR25-1C1 | D. melanogaster | SSTATGMKRLAGKVAVVTASTdgiGFAIAKRLAEDGAAVVISRRKQNVD SALAE LRKL N  | 1p.1                                |      |      |
| SDR25-1C1 | A. mellifera    | NLSEIKYKRLEGKVAIVTASTqgiGFAIAKRLAEEGAKVMISRRKEENVQNALKELKS KN   | 1p.1                                |      |      |
| SDR25-1C1 | C. elegans      | --MPSNCRRFEGKVAIVTAATKgiGLAIAERLLDEGASVVI GSRNQKNVDEAIEYLKNKG   | 1p.1                                |      |      |
| SDR25-1C1 | A. californica  | ----MAGLAGKVAIVTASTdgiGFAIARRLAQDGAKVMVSSRKQNNVDNAVKALKQEN      | 1p.1                                |      |      |
|           |                 | * * *                                                           |                                     |      |      |
| <br>      |                 |                                                                 |                                     |      |      |
| SDR25C1   | H. sapiens      | LS-VAGIVCHVGKAEDREQLVkaLEHCGGVDFLVCSAGVNPLVGSTLTGTSEQIWDkiLS    | 2p.0                                |      | 3p.0 |
| SDR25C2   | H. sapiens      | LS-VGTGTVCHVGKAEDRERLVtaVKLHGGDILVSNAAVNPFPGSIMDVTEEVWdk tLD    | 2p.0                                |      | 3p.0 |
| SDR25-1C1 | S. purpuratus   | LS-VSGLVCHVGKQADRakLietaVKENGGLDILVSNAAANPHFGNlLdcDEQAwdkiFD    | 1p.0                                | 2p.0 | 3p.0 |
| SDR25-1C1 | D. melanogaster | LN-VHGLKCHVSEPEDRKQLFEETISKFKGLNILVSNAA TNPAVGGVLECDEK VWDKI FD |                                     |      |      |
| SDR25-1C1 | A. mellifera    | LN-VCGMTCHVGKNEDRKS LLektIQEFHGLDILVLNAGINPSASTFFFTSES VWDKIFE  | 2p.0                                |      |      |
| SDR25-1C1 | C. elegans      | LTKVAGIAGHIAS TDDQKKLVdf tLQKF GKINILVNNHGINPAGHILEVSDQVWDKLF E | 2p.0                                |      |      |
| SDR25-1C1 | A. californica  | LN-VEGLVCHVAKKEDRSKLFnetVKKFGGIDVLVSNAA SStyFGPTLnt PEDSydkmFD  | 2p.0                                | 3p.0 | 4p.0 |
|           |                 | * * *                                                           |                                     |      |      |
| <br>      |                 |                                                                 |                                     |      |      |
|           |                 | + +                                                             |                                     |      |      |
| SDR25C1   | H. sapiens      | VNVKSPALLS QLLPYMENrr-GAVILVSSIAAYNPvvaLGVINVSKTALLGLTRTLAE     | 4p.1                                | 5p.0 |      |
| SDR25C2   | H. sapiens      | INVKAPALMTKAVVPMEKRGgggsVVIVSSIAAFSPspgFSPYNVSKTALLGLTKTLAE     | 4p.1                                | 5p.0 |      |
| SDR25-1C1 | S. purpuratus   | INVKSTFLLVKESVPHMVSRgggsIVVSS IAGYMPFELLGPYSVSKTALLGLTKALT PQ   | 4p.1                                |      |      |
| SDR25-1C1 | D. melanogaster | VNVKSSYLLAKEALPLL RQKNSSIVFVSSIAGYDAfel LGAYS VKTALI GLTKAAAKD  |                                     | 2p.0 |      |
| SDR25-1C1 | A. mellifera    | INVKSTFLLRDSLPLFLRKS KSA SVILLSSIVGS PFDmLGVSISKTTILGINQVAANI   |                                     | 3p.0 |      |
| SDR25-1C1 | C. elegans      | VNVKAGFQM TKLVHPHIAKBEgggaiIFNASYSAYKSPPGAAYGVTKTTLVGLTRALAMG   |                                     |      |      |
| SDR25-1C1 | A. californica  | LNVKSSFMLCKEVPMEKRGsgsmILVSSIAAYTPmsmIGIYSLTKTALLGLNKVLAPE      | 5p.1                                | 6p.0 |      |
|           |                 | ** *                                                            |                                     |      |      |
| <br>      |                 |                                                                 |                                     |      |      |
| SDR25C1   | H. sapiens      | LAPKD IRVNCVPGIIKTFDSkvfHGNE SLWKNF---KEHHQLQRiGESED CAGIVSFLC  | 6p.0                                | 7p.1 |      |
| SDR25C2   | H. sapiens      | LAPRNIRVNCLAPGLIKTSF SRmlWMDKEKEESM---KETLRIRrlGEPEDCAGIVSFLC   | 6p.0                                | 7p.1 |      |
| SDR25-1C1 | S. purpuratus   | LSDMNIRVNCVAPGLVKTFKSSalLSSEESTKLA---LSGIPMKRAGTPDEISGIVSFLA    | 5p.0                                |      |      |
| SDR25-1C1 | D. melanogaster | LAPEGIRVNCLAPGVRTIKFSKALYENESANEAA---LSKIPMGRLGTSEEMAGVVSFLV    |                                     |      |      |
| SDR25-1C1 | A. mellifera    | LAPEGIRVNCIAPGI IKTFsqiliYENET-GEMM---LSKIPMNKFGKSDNIGSVAFLA    | 4p.0                                |      |      |
| SDR25-1C1 | C. elegans      | LAKDNIRVNGIAPGVIKTKMSQvlWDGGEDA EKELTDIQEI ALGRLGVPDDCAGTVAYLA  | 3p.0                                |      |      |
| SDR25-1C1 | A. californica  | LAAHNIRINCIAPGI IKTFSnalTQNE DALNVA---LSTIPLGr lGTPEEC SGASFLA  | 7p.0                                | 8p.1 |      |
|           |                 | * ** *                                                          |                                     |      |      |
| <br>      |                 |                                                                 |                                     |      |      |
| SDR25C1   | H. sapiens      | SPDASYVNGENIAVAGYSTRL-                                          |                                     |      |      |
| SDR25C2   | H. sapiens      | SEDASYITGETVVVGGGTPSRL                                          |                                     |      |      |
| SDR25-1C1 | S. purpuratus   | SDDASYITGENILVAGGAPSRL                                          |                                     |      |      |
| SDR25-1C1 | D. melanogaster | SEDAGYITGESIVAGGGM TARL                                         |                                     |      |      |
| SDR25C1C1 | C. elegans      | SDDSSYITGEMII IAGGVQARL                                         |                                     |      |      |
| SDR25C1C1 | A. mellifera    | SDDASYITGETIVVAGGM RSRL                                         |                                     |      |      |
| SDR25-1C1 | A. californica  | SDDSAYMTGETIVVSGG MTRL                                          |                                     |      |      |
|           |                 | * * *                                                           |                                     |      |      |

Figure S32. Alignment of the invertebrate orthologs of the human SDR25C family variants. For further details see Fig. S25 and Table S34.

\* symbol marks the position of identical amino acid residues of the aligned SDR protein sequences.

|                                                                                                                                                              |                |                                                               |      |      |
|--------------------------------------------------------------------------------------------------------------------------------------------------------------|----------------|---------------------------------------------------------------|------|------|
| SDR26C1                                                                                                                                                      | H. sapiens     | -----MAFMKKYLLPILGLFMAYYYYSANE-----EF                         |      |      |
| SDR26C2                                                                                                                                                      | H. sapiens     | -----MKVLLLTGLGAL--FFAYYWD-----NF                             |      |      |
| SDR26-1C2                                                                                                                                                    | C.intestinalis | -----MSYCFKALFVIIVA-IVTYSFIQPD-----DY                         |      |      |
| SDR26-1C4                                                                                                                                                    | C.intestinalis | -----MGWLRVTAVVVIA--CILYSAVRES-----GY                         |      |      |
| SDR26-1C1                                                                                                                                                    | S. purpuratus  | MALGTIYLIALCIAAVFILLSIRVLYFIALFLLVTFLICFFLSMVSDGDLTLMLYELIGN  |      |      |
| <div> <div></div> <div> <div>x</div> <div>x</div> <div>x</div> </div> </div>                                                                                 |                |                                                               |      |      |
| SDR26C1                                                                                                                                                      | H. sapiens     | RpeMLQGKKVIVTGASKGIGREMAYHLAKMGAHVVTARSKETLQkvVSHCLELGAASAH   | 1p.2 | 2p.0 |
| SDR26C2                                                                                                                                                      | H. sapiens     | DpaSLQGARVLLTGANAGVGEELAYHYARLGSHLVLTATHEALQkvVGNCRLGAPKVF    | 1p.2 | 2p.0 |
| SDR26-1C2                                                                                                                                                    | C.intestinalis | DtgILKNKRVLITGASQNIIGEELATQYAQSGAKIVITARREDKLKevAAKCRKAGATSVD | 1p.2 | 2p.0 |
| SDR26-1C4                                                                                                                                                    | C.intestinalis | NpdEVKGLRVVITGASSGIGEQIAYKFASMGAKLHITARRESILQkvAARAKELGAIESH  | 1p.2 | 2p.0 |
| SDR26-1C1                                                                                                                                                    | S. purpuratus  | KgdNMMGRVVWITGASSGIGEEELAYQLARKgAKVVLsARRVNElERVGNcVRFpEVREE  | 1p.2 | 2p.0 |
| <div> <div></div> <div> <div>*</div> <div>***</div> <div>*</div> <div>*</div> <div>*</div> <div>*</div> <div>*</div> <div>*</div> <div>*</div> </div> </div> |                |                                                               |      |      |
| SDR26C1                                                                                                                                                      | H. sapiens     | ---YIAGTMEDMTFAEQFVAQAGKlmgGLDMLILNHITNTSLNLFHDD---IHHVRKSM   | 3p.2 |      |
| SDR26C2                                                                                                                                                      | H. sapiens     | ---YIAADMASPEAPESVVQFALDKlgGLDYLVNLHIGGAPAGTRARS---PQATRWM    | 3p.2 |      |
| SDR26-1C2                                                                                                                                                    | C.intestinalis | ---YIVADMADIEQVKNVVKDAVALlgGLDQLVLNHVTGLNHPGMWNNSQFNLDYAQnsA  | 3p.2 | 4p.1 |
| SDR26-1C4                                                                                                                                                    | C.intestinalis | ---YLTISLSSYENSTLAVKDALEKlgGIDVLIILNHFTNNYLGsYRHE---AKDIEKLF  | 3p.2 |      |
| SDR26-1C1                                                                                                                                                    | S. purpuratus  | NILVLPMDATKYETHGQVAETIVDRYgkiDILINNSGRsQRAL--VQ--DCKIEVDKAIM  | 3p.0 |      |
| <div> <div></div> <div> <div>*</div> <div>*</div> <div>*</div> <div>*</div> </div> </div>                                                                    |                |                                                               |      |      |
| <div> <div></div> <div> <div>+</div> <div>+</div> </div> </div>                                                                                              |                |                                                               |      |      |
| SDR26C1                                                                                                                                                      | H. sapiens     | EVNFLSYVVLTVAAALPMLKQ-SNGSIVVSSlAgKVAYPMVAAYSASKFALDGFSSIRK   |      | 4p.2 |
| SDR26C2                                                                                                                                                      | H. sapiens     | qvNFVSYVQLTSRALPSLTD-SKGSILVVSSlAgRVPTSFSSTPYSAAKFALDGFGLRR   | 4p.0 | 5p.2 |
| SDR26-1C2                                                                                                                                                    | C.intestinalis | IVNYVSYIHLSTHAIPHLE-SNGNLIVVSSlAgHVPTINTAIYGATKASLNHFYASLRL   |      | 5p.2 |
| SDR26-1C4                                                                                                                                                    | C.intestinalis | MPNMLTHAHLASVAMESLIE-NKGRIATSSAvaLLGGAFTVPYTTTKFALGGFFRSLEH   |      | 4p.2 |
| SDR26-1C1                                                                                                                                                    | S. purpuratus  | DLNLMGPISLFEKVALPYMLENNYGQIINISSATGIMPAPLSSAYCASKHGMhgFFNSVRS | 4p.0 |      |
| <div> <div></div> <div> <div>*</div> <div>*</div> <div>*</div> <div>*</div> <div>**</div> <div>*</div> <div>*</div> <div>*</div> <div>*</div> </div> </div>  |                |                                                               |      |      |
| SDR26C1                                                                                                                                                      | H. sapiens     | EYSVS-RVNVsITLCVLGLIDteTAMKAVSGIVHMQAAPKEECA-LEI-----         | 5p.2 |      |
| SDR26C2                                                                                                                                                      | H. sapiens     | ELDVQ-DVNVAITMCVLGLRDRASAAEAavrSSTSRPRQPEHRGVPLQSQTAMFLPP---- | 6p.2 |      |
| SDR26-1C2                                                                                                                                                    | C.intestinalis | EMMASERDPYSITICMMGPIETDRSRWS-----KfpDKVNMKGNPIDDTAAQI-----    | 6p.1 |      |
| SDR26-1C4                                                                                                                                                    | C.intestinalis | ELTIN-KTGVSVSLIQLGYvatNSSKAIAD-KIKATGASKIECASE-----I-----     | 5p.2 |      |
| SDR26-1C1                                                                                                                                                    | S. purpuratus  | ELSYR---NIAVTMVCPGPPVSNIVENALREDFTrpAAKPYDGTADRSYKVLMSTERCAA  | 5p.0 |      |
| <div> <div></div> <div> <div>*</div> <div>*</div> </div> </div>                                                                                              |                |                                                               |      |      |
| SDR26C1                                                                                                                                                      | H. sapiens     | --IKGGALR-----QEEVYYDSSLWTTL--IRNPCRKILE                      |      |      |
| SDR26C2                                                                                                                                                      | H. sapiens     | -TVPGARTLTETPLRGWPQPKMKSSRQKSKTEKNDGHLEPVTAWEVQVPRVRRLCRGLAR  |      |      |
| SDR26-1C2                                                                                                                                                    | C.intestinalis | --IkaGTTRR-----SYLFIPWWTKYASAVKAIPSQLVD                       | 7p.2 |      |
| SDR26-1C4                                                                                                                                                    | C.intestinalis | --VRGIMTR-----EKLIYFPGYVSWIPLMRALFPNYVD                       |      |      |
| SDR26-1C1                                                                                                                                                    | S. purpuratus  | LTVVAIANK---LNEVWVARQP-----I--LLFYMAQYMPGFtKwmTPLIG--RGRV-    | 6p.1 |      |
| SDR26C1                                                                                                                                                      | H. sapiens     | FLYSTSYNMDRFINK                                               |      |      |
| SDR26C2                                                                                                                                                      | H. sapiens     | P---HLFGHD----                                                |      |      |
| SDR26-1C2                                                                                                                                                    | C.intestinalis | RMFLKIFYNK----                                                |      |      |
| SDR26-1C4                                                                                                                                                    | C.intestinalis | KMTREAYYEGAFD--                                               |      |      |
| SDR26-1C1                                                                                                                                                    | S. purpuratus  | ----KQYNQSQAQ--                                               |      |      |

Figure S33. Alignment of the invertebrate orthologs of the human SDR26C family variants. For further details see Fig. S25 and Table S35.

\* symbol marks the position of identical amino acid residues of the aligned SDR protein sequences.

|           |                 |                                                                |           |
|-----------|-----------------|----------------------------------------------------------------|-----------|
| SDR28C1   | H. sapiens      | -----                                                          |           |
| SDR28C2   | H. sapiens      | -----                                                          |           |
| SDR28-1C2 | C.intestinalis  | MVYVVHLTDEVTKSFLSQKRATYRNMFTGELGRSVFGATVFTFVFALGVPWIGSTIFYIL   |           |
| SDR28-1C1 | S. purpuratus   | -----                                                          |           |
| SDR28-1C2 | S. purpuratus   | -----                                                          |           |
| SDR28-1C3 | S. purpuratus   | -----                                                          |           |
| SDR28-1C1 | A. californica  | -----MMW--                                                     |           |
| x x x     |                 |                                                                |           |
| SDR28C1   | H. sapiens      | -----MARTVVLITGCSSGIGLHL                                       |           |
| SDR28C2   | H. sapiens      | -----MNGQSQVLPGGGHESREGINMAAAPRTVLISGCSSGIGLEL                 |           |
| SDR28-1C2 | C. intestinalis | GLNYgcCTSTIAFFA-----TC-FLALLIFAVFPRGRLNPKDKAVLITGCDSGFGPLL     | 1p.2      |
| SDR28-1C1 | S. purpuratus   | -----MAPLVVLISGCSTGIGLAL                                       |           |
| SDR28-1C2 | S. purpuratus   | -----MAPLVVLISGCSTGIGLAL                                       |           |
| SDR28-1C3 | S. purpuratus   | -----MAPLITLITGCSTGIGLTT                                       |           |
| SDR28-1C1 | A. californica  | LLLLPCGLALAVLLAVLFAFADTDFLLAL--YEKFGKDCGSLSGKVWITGASSGIGEHI    |           |
| * * * *   |                 |                                                                |           |
| SDR28C1   | H. sapiens      | AVRLASDPSQSFkvYATLRDLKTQGRLEWAAARA----LACPPGSLETQLQDVRDSKSVAA  | 1p.2      |
| SDR28C2   | H. sapiens      | AVQLAHPKKRYqvVATMRDLGKKETLEAAAGE----AL--GQTLTVAQLDVCSDSVAQ     | 1p.2      |
| SDR28-1C2 | C. intestinalis | AKQLHALGMHVFagC-LLKDKGGEGAKHL-----MKIQSSRFHVLQLDVTNDSEIKM      | 2p.2      |
| SDR28-1C1 | S. purpuratus   | AVRLAQDPDKKYLVIYATMRNLAKKEGLEKAASD----AL--DKTLFVRQLDVTVDQVKS   |           |
| SDR28-1C2 | S. purpuratus   | AVRLAQDPDKKYLVIYATMRNLAKKEAIEKAAGD----AL--DKTLFVRQLDVTVDQVKT   |           |
| SDR28-1C3 | S. purpuratus   | AVKMAKD-AKKYIVYATMRNLAKKGDLEQAAGS----AL--NDTLFVRQLDITEESIVA    |           |
| SDR28-1C1 | A. californica  | AYCLAKSGCRLVL---TARRVEELERVQACISQGPNSAALEKNILVLPDVLVHFHKhRE    |           |
| * **      |                 |                                                                |           |
| SDR28C1   | H. sapiens      | ARERV--T---EGRVDVlv-CNAGLGLLGPLEALGEDAVASVLDVNVVGTVRMLQAFLPD   | 2p.2      |
| SDR28C2   | H. sapiens      | CLSCI-----QGEVDVlv-NNAGMGLVGPLEGLSLAAMQNVFDTNFVGAVRLVKAVLPG    | 2p.2      |
| SDR28-1C2 | C. intestinalis | AVQYIGMHIPPNDqgLWGI VNNAGASAFGEIEWSSIDLYKKVAEVLN LGVIRCTQACLPL | 3p.2      |
| SDR28-1C1 | S. purpuratus   | IFEFIMEK---HGRVDVli-NNAGFGFGPLEAMSMEKAKNMFDTNYFGTVRLIRAALPI    | 1p.2      |
| SDR28-1C2 | S. purpuratus   | IFEFIMGHGRVDV---lvKNNAGFGFGFALEAMSMEKAKNMFDTNYFGTVRLIRAALPI    | 1p.2      |
| SDR28-1C3 | S. purpuratus   | IVKQIKEK---HGKIDILVNNAAFGWMGPLEEMTMTHMRNMSETNIVGTFRMTQEVLP     |           |
| SDR28-1C1 | A. californica  | AVQTVLEH----FGqiDILVNNAARGQFAEWIKVELDVDELFTETNLVGPVSLSQEVVPH   | 1p.0      |
| ** * *    |                 |                                                                |           |
| + +       |                 |                                                                |           |
| SDR28C1   | H. sapiens      | MKRRGSGRVLVTGVSvgLmgLPFNDVYCASKFALEGLCESLAVLLL PFGVhLSLIECGPV  | 3p.2 4p.1 |
| SDR28C2   | H. sapiens      | MKRRRQGHIVVISSVMGLggVIFNDVYAASKFALEGFFESLAIQLLQFNIfiSLVEPGPV   | 3p.2 4p.1 |
| SDR28-1C2 | C. intestinalis | I-RrakGRVVNMASGFGRMIA GRSVYGITKWAVEGFS DCLRYEMRRWGvkvSIIIEPGNY | 4p.1 5p.0 |
| SDR28-1C1 | S. purpuratus   | MKKQKSGRIVNISSMVGHlaLPYMDMYNASKFAMEGLSESLLPQLKNFGIsiSTVQPGPV   | 2p.2 3p.1 |
| SDR28-1C2 | S. purpuratus   | MKKQKSGRIVNISSVvGHlaLPYMDMYNASKFAMEGLSESLLPQLKNFGIsiSTVQPGPV   | 2p.2 3p.1 |
| SDR28-1C3 | S. purpuratus   | MKKQKSGRIVNISSLAGIngFPFSAVYSASKFALEGFTESLHPELKCfNIkiSTVC PGPV  | 1p.2 2p.1 |
| SDR28-1C1 | A. californica  | MIKRGGGQIVVTSSMAGKmgLPGARSYTGSKHaihgyFESLRTEMAGKNIEVTLICPGPT   | 2p.2 3p.0 |
| * * * * * |                 |                                                                |           |
| SDR28C1   | H. sapiens      | HTAFM-----EKVLGSPE--EVLDRDTIH TFRFYQ-YLAHSKQVFREAAQN-PEEVAe    | 5p.0      |
| SDR28C2   | H. sapiens      | VTEFE-----GKLLAQVSMAEFFPG-TDPETLHYFRDLYLPASRKLFC SVGQN-PQDVVq  | 5p.0      |
| SDR28-1C2 | C. intestinalis | IAGTSIFTEDGVKKLGDSMWEKMPDNVKEDYGKKLFDLrvAE-MQTYCSKGMDDL RPVLN  | 6p.0      |
| SDR28-1C1 | S. purpuratus   | ATNFG-----EALANAGTEEDNKDVSEETVKQMTAFRLLL-HKPDLFAAQQ-TEPVID     |           |
| SDR28-1C2 | S. purpuratus   | ATNFG-----EALVANAGTEEDNKDVSEETVkgMTAFRLLL-SKPDLF TAE-TGPVID    | 4p.0      |
| SDR28-1C3 | S. purpuratus   | ITSFK-----DNMSANQDPEAKSSDAENPTKklFTGAIAAM-MPHMKSA AQT-SDEIAD   | 3p.0      |
| SDR28-1C1 | A. californica  | FSQLY-----LTAATER-LGetLGLRMEKTQKRMSTS-----RCAYLSCVAM-ANQVSE    | 4p.0      |
| SDR28C1   | H. sapiens      | vFL-----TALRAPKPTLRYFTTTERFLPLLRLDDPSGGSNYVTAMHREVFGDVPAK      |           |
| SDR28C2   | H. sapiens      | aIV-----NVISSRTPPLRQTNI RYSPLTTLKTVDSGSLYVRTTHRLLFRCPRLL       |           |
| SDR28-1C2 | C. intestinalis | AYE--DALLSRIPLIRYQPM EAYWTIRSFVTHFPFSFIADyly-----IYRKAKK-      | 7p.1      |

|           |                 |                                                          |
|-----------|-----------------|----------------------------------------------------------|
| SDR28-1C1 | S. purpuratus   | VIV-----ECVEAEKPKLRYPTSESVRHLI-----                      |
| SDR28-1C2 | S. purpuratus   | VIV-----ECVQAEKPKLRYPTSENVRSWVAKRYREEGVT-GLESIFE-----    |
| SDR28-1C3 | S. purpuratus   | VII-----DCIKAEDPALRYGTNEGTSKRVTDRFGGGIGDAAAQNWKMLEPASKI- |
| SDR28-1C1 | A. californica  | AWIMQQPVLLTAYIIQYAPVLGRWLLKKFGPKQVQKIREGK-----           |
|           |                 | *                                                        |
|           |                 |                                                          |
| SDR28C1   | H. sapiens      | AEAGAE-AGGGAGPGAEDAGRGAVGDPELGDPAPQ                      |
| SDR28C2   | H. sapiens      | -NLGLQCLSCGCLPTRVRPR-----                                |
| SDR28-1C2 | C. intestinalis | -----                                                    |
| SDR28-1C1 | S. purpuratus   | -----                                                    |
| SDR28-1C2 | S. purpuratus   | -----                                                    |
| SDR28-1C3 | S. purpuratus   | -----                                                    |
| SDR28-1C1 | A. californica  | -----                                                    |

Figure S34. Alignment of the invertebrate orthologs of the human SDR28C family variants. For further details see Fig. S25 and Table S36.

\* symbol marks the position of identical amino acid residues of the aligned SDR protein sequences.

|           |                 |                                                                |      |      |      |
|-----------|-----------------|----------------------------------------------------------------|------|------|------|
| SDR32C1   | H. sapiens      | MVSPATrkSLPKVKAMDFITS----TAILPLLFGCLG----VFGLFRLLQWVRGKAYLRN   | 1p.1 |      |      |
| SDR32C2   | H. sapiens      | -----MGVMAMLMPLLLLLGISGLLFI-YQEVSRSLWSKSAVQN                   |      |      |      |
| SDR32-1C2 | C. intestinalis | -----MEEMKN                                                    |      |      |      |
| SDR32-1C1 | S. purpuratus   | -----MSSASSMNSLTVATAAIFGSLG----LLWLYKKLRSQRRRAGLKD             |      |      |      |
| SDR32-1C1 | D. busckii      | -----MKLHEMEKCAPSSDWNVLYWVIGTILMPIALPLALINIWRFRQNYRNQLPG       |      |      |      |
| SDR32-1C1 | A. gambiae      | -----MKNLAERSAGSLYWLLATLFLPIAIPGLVLKLLTMMKEQRNARHLNG           |      |      |      |
| SDR32-1C1 | A. dorsata      | -----MTEESLKSWHLIWWLFKLFGPITIPWLIYHFLDIMQQKRRKKTNG             |      |      |      |
| SDR32-1C1 | H. robusta      | -----MSVLLF--SVGVGLLSVAGTV--YYFFCYKKCSSSLKG                    |      |      |      |
| SDR32-1C1 | A. californica  | -----MGIRANAVWAVLGLPFSLLS----VFYYIYVY-CCKEKLMLKD               |      |      |      |
|           |                 |                                                                |      |      |      |
|           |                 | x x x                                                          |      |      |      |
| SDR32C1   | H. sapiens      | AVVVITGATSGLGkeCAKVFYAAGAKLVLCGRNGGALEELIRELTASHATkv----QTH    |      | 2p.2 | 3p.0 |
| SDR32C2   | H. sapiens      | KVVVITbAISGLGkeCARVFHTGGARVLVLCGNWERLENLYDALISVADPSkq----TF    |      | 1p.2 | 2p.0 |
| SDR32-1C2 | C. intestinalis | KVVLITtgASSGIGEGGLACAFARQGASLSLCGRNVENLKKVAEKCVCSEGAakt-----   | 1p.2 | 2p.0 |      |
| SDR32-1C1 | S. purpuratus   | KVVLITGASSGVGeaCAIAFYRLGCKVILCARRAPELERVKKELMGPEigSRD---TSTH   |      | 1p.2 | 2p.2 |
| SDR32-1C1 | D. busckii      | kvVLITGASSGLGESLAHVFFYRAGCKVILAARRVQELERVKKDLALD--vq-PA----Y   | 1p.0 | 2p.0 |      |
| SDR32-1C1 | A. gambiae      | kvVLITGASSGLGEALAHSSFFLAGCKVLAARRKDELERVRKDLLELHAtVPT-----H    | 1p.0 | 2p.0 |      |
| SDR32-1C1 | A. dorsata      | kvVIITGASSGLGEALAHVFIACGCKIILISRKEELDRVKNTLMNTHvtVPT-----Y     | 1p.0 | 2p.0 |      |
| SDR32-1C1 | H. robusta      | KVVLIVGASSGIGeCAHIFYKENCKLILCAKDLPDLERVKKEVEESYRKT DENCESTSE   |      | 1p.2 |      |
| SDR32-1C1 | A. californica  | KVVFITGASSGLGaCAEAIFYTAGCRLVLSGRNVEKLNLLKVRMEKSKegTGF-----H    |      | 1p.2 | 2p.0 |
|           |                 |                                                                |      |      |      |
|           |                 | ** * * * * * *                                                 |      |      |      |
|           |                 |                                                                |      |      |      |
| SDR32C1   | H. sapiens      | KPYLVTFDLTDSGAIVAAAAEILQCFGYVDILVNNAGISYRGTIMDTVDVDRVMETNY     |      |      |      |
| SDR32C2   | H. sapiens      | TPKLVLLDLSDISCPVDVAKEVLDICYGCVDILINNASVKVKGAHKISLELDKKIMDANY   |      |      |      |
| SDR32-1C2 | C. intestinalis | --IQVVADVKNVKDMERMVDETVAKLQIDVLINNAGYGCKGGIengTLEQFDEVFSVNL    | 3p.0 |      |      |
| SDR32-1C1 | S. purpuratus   | TPC-HTLRPRKTRRVTDKAKEALALHGHVDILINNGMSGRGSVAETVLSVHQKIMNVNH    |      |      |      |
| SDR32-1C1 | D. busckii      | PPTVLALDLSELNSIPQFAKRVLEVYNQVDILINNGGISVRADVSTAVDVLKVMIVNY     |      |      |      |
| SDR32-1C1 | A. gambiae      | PPILPLDLSDLNSIGGKVQSVLEIHGAIDILVNNGGISVRGDALSTAIDVDIRIMLVNY    |      |      |      |
| SDR32-1C1 | A. dorsata      | PPVILPVDITNINNLTQETITKIIDIHGRIDILINNAGISYRGEIINTNMVDIKVMLTNY   |      |      |      |
| SDR32-1C1 | H. robusta      | EVTIFQLDISNLNETTKISECIQHGHIDILGIGAGISFRGKI IETELSDQLIMSVNY     |      |      |      |
| SDR32-1C1 | A. californica  | SPAIVTMDLEDLPSIKEKVKEVLAAFGHVDILINNAGKSYRGVALHTKLEVDKMLMDVNY   |      |      |      |
|           |                 |                                                                |      |      |      |
|           |                 | * *                                                            |      |      |      |
|           |                 |                                                                |      |      |      |
|           |                 | + +                                                            |      |      |      |
| SDR32C1   | H. sapiens      | FGPVALTkaLLPSMIKRRQGHIVAIAISSIQGKMSIPFRSayaASKHATQAFFDCLRAEMEQ | 4p.2 | 5p.2 |      |
| SDR32C2   | H. sapiens      | FGPITLTkaLLPNMISRRTGQIVLVNNIQGKGFI PFRTtyAASKHAALGFFDCLRAEVEE  | 3p.2 | 4p.2 |      |
| SDR32-1C2 | C. intestinalis | KAPYYLMQLCLPHLK-KTkgCVINLSSCYTNMFVPDAVHYSMTKVGLDHLTKCAAieLGK   | 4p.2 | 5p.2 |      |
| SDR32-1C1 | S. purpuratus   | FGSLVLTsaILPNMISRSGHILSVSSQIGRAIPFRSaysASKHAMQAFDLSLRAEVAE     | 3p.2 | 4p.2 |      |
| SDR32-1C1 | D. busckii      | FGTVALTkaLLPSMIKRNKGHCIFISSVQGKFAIPQRAAYSASKHAMQAFADSLRAEMAN   | 3p.2 |      |      |
| SDR32-1C1 | A. gambiae      | FGSVALTKACLPMMARKEGRIVS ISSVQGKFAIPHRSAAYSASKHAMQAFCDLSLRAEVAK |      |      |      |
| SDR32-1C1 | A. dorsata      | FAQIALAkvILPYMIKQQSGHIVCISSIQGKISIPYrsAYAASKYALQAWCDCCRAELHD   | 3p.2 | 4p.1 |      |
| SDR32-1C1 | H. robusta      | FGHVAATkaVLKSMVERRSGHIVYSSSQGKLSIPFRSAYSASKHAIQAFADCLRAEVAq    | 2p.2 | 3p.1 | 4p.2 |
| SDR32-1C1 | A. californica  | FAHVEVTraILQMVERKTGQIVAIGSVQSRIAIPHRTsyaASKHAMQAYFDVLRSEVAQ    | 3p.2 | 4p.2 |      |
|           |                 |                                                                |      |      |      |
|           |                 | * * *                                                          |      |      |      |
|           |                 |                                                                |      |      |      |
| SDR32C1   | H. sapiens      | YEIEVTVISPGYIHTNLSVNAI-TADGSRygvM-DTT---TAQGRSPVEVAQDVL-----   | 6p.2 |      |      |
| SDR32C2   | H. sapiens      | YDVVISTVSPTFIRSYHYPEQGNWEASIWkfF-FRK---LTYGVHPVEVAEEVM-----    | 5p.2 |      |      |
| SDR32-1C2 | C. intestinalis | YGIRVNNVnpGLVVTEMVKANWKPDELEAFCKDFLSNTPLENESLSIQEVADVVI FLTSS  | 6p.0 |      |      |
| SDR32-1C1 | S. purpuratus   | HNIQVTVLSPSYIKTNISLSAL-DGDGSVhakM-DST---TAGGMSTVYVADKVV-----   | 5p.2 |      |      |
| SDR32-1C1 | D. busckii      | KNIYVSCVSPSYIRTQLSMNAL-TGAGSSYgkM-DET---TAKGMSPDKLAERIL-----   | 4p.2 |      |      |
| SDR32-1C1 | A. gambiae      | DNIKVTLISPGYINTALSLNAL-TGTGASYgkM-DAA---TAGGASPDQTASSIL-----   | 3p.2 |      |      |
| SDR32-1C1 | A. dorsata      | QNIKITIVSPGYIKTSLSLNAL-TGNGQIYgvM-DKT---IQEGYYPKYVAERIL-----   | 5p.2 |      |      |
| SDR32-1C1 | H. robusta      | fNVRVSVVSPAYVRTNLSLNALTSSGSLHGkm--DEN---QKSGMSAEVGVQAVV-----   | 5p.2 |      |      |

SDR32-1C1 A. californica YNIGVSVNPPYYIATNLSTNAV-SADGSAYgkL-DAN---TKAGLQPEYVASKVV----- Sp.2

\*

SDR32C1 H. sapiens -----AAVGKKKKDVILADLLPSLAVYLRTLAPGLFFSLMASRARKERKSKNS--

SDR32C2 H. sapiens -----RTVRRKKQEVFMANPIPKAAVYVRTFFPEFFFAVVACGVKEKLVPEEG-

SDR32-1C2 C. intestinalis AAKSITGTCLPVEKGRI LMGN-----

SDR32-1C1 S. purpuratus -----DAVAKQQRDVVLGPFTHGAIIYIRALVPNLYFWIMAGRARKGTKMED---

SDR32-1C1 D. busckii -----QCILRKEPDVIVSDLQAKIAYYLRHILPSAYFWIMAKRALKLERAEKKKD

SDR32-1C1 A. gambiae -----KAIARDEKDVMLAPIAPRAAYWLRHLAPSVYFWIMKKRAEKLNST-----

SDR32-1C1 A. dorsata -----KAVLKEEKDILITPFIPKAAMYLRTLCPSLYFWIMQKRAKNTKEKE----

SDR32-1C1 H. robusta -----QAVLLDKKEVLLANCSYKMIVYFRNFLSDIYFMAMARRARSS-----

SDR32-1C1 A. californica -----SCVVNRTSELTVPAPHIDLAIALRAMSPWLFFKIMERRAKKEQREMKNDR

Figure S35. Alignment of the invertebrate orthologs of the human SDR32C family variants. For further details see Fig. S25 and Table S37.

\* symbol marks the position of identical amino acid residues of the aligned SDR protein sequences.



|           |                 |                                                                |
|-----------|-----------------|----------------------------------------------------------------|
| SDR42E1   | H. sapiens      | -----                                                          |
| SDR42E2   | H. sapiens      | MKSNPPRSSLEACKAAGQGEKSCPVCQACGEVSGPRSGSGSESERPAPKPGAI PGPGLGPK |
| SDR42-1E1 | C. intestinalis | -----                                                          |
| SDR42-1E1 | S. purpuratus   | -----                                                          |
| SDR42-1E2 | C. elegans      | -----                                                          |
| SDR42-2E2 | C. elegans      | -----                                                          |
| SDR42-1E2 | C. remanei      | -----                                                          |
| SDR42-1E1 | A. californica  | -----                                                          |

|           |                 |                                                              |
|-----------|-----------------|--------------------------------------------------------------|
| SDR42E1   | H. sapiens      | -----                                                        |
| SDR42E2   | H. sapiens      | AIPGPQAGSGTVPRPGAISGTGPGLGPGAGSVPGPGAGSV PGLGARSVPGPAGAGSVPG |
| SDR42-1E1 | C. intestinalis | -----                                                        |
| SDR42-1E1 | S. purpuratus   | -----                                                        |
| SDR42-1E2 | C. elegans      | -----                                                        |
| SDR42-2E2 | C. elegans      | -----                                                        |
| SDR42-1E2 | C. remanei      | -----                                                        |
| SDR42-1E1 | A. californica  | -----                                                        |

|           |                 |                                                               |
|-----------|-----------------|---------------------------------------------------------------|
| SDR42E1   | H. sapiens      | -----                                                         |
| SDR42E2   | H. sapiens      | PGAGSVPGPGAGSVPGPGAGSGPGLGGGLGPGVGVAGPGAGSVPGPGAGSVPGPGAGSVPG |
| SDR42-1E1 | C. intestinalis | -----                                                         |
| SDR42-1E1 | S. purpuratus   | -----                                                         |
| SDR42-1E2 | C. elegans      | -----                                                         |
| SDR42-2E2 | C. elegans      | -----                                                         |
| SDR42-1E2 | C. remanei      | -----                                                         |
| SDR42-1E1 | A. californica  | -----                                                         |

|           |                 |                                                              |      |
|-----------|-----------------|--------------------------------------------------------------|------|
| SDR42E1   | H. sapiens      | -----MDPKRSQKESV                                             |      |
| SDR42E2   | H. sapiens      | PGAGSVPGAGAGSTPEPELGPGLRQSGGTGPRPSESTTTPTPAPQKQTQAKPTKAARQKV |      |
| SDR42-1E1 | C. intestinalis | -----MDSVSDLTDTLGLPENFKLKTGTNGHsrRLKF                        | 1p.1 |
| SDR42-1E1 | S. purpuratus   | -----                                                        |      |
| SDR42-1E2 | C. elegans      | -----MSIKRLSMRLKKGIIHRSWNRMTSLEAGLEEEKEIKIVEEpePRPWKV        | 1p.2 |
| SDR42-2E2 | C. elegans      | -----MGHY                                                    |      |
| SDR42-1E2 | C. remanei      | -----MKHY                                                    |      |
| SDR42-1E1 | A. californica  | -----MVQTRSSAQSRDKEIH                                        |      |

|           |                 |                                                              |      |
|-----------|-----------------|--------------------------------------------------------------|------|
|           |                 | x x x                                                        |      |
| SDR42E1   | H. sapiens      | LITGGSGYFGFr1GCALNQNGVHVILFDISSPA-----Q---T                  | 1p.1 |
| SDR42E2   | H. sapiens      | LVTGGGGYLGFSLGSHLAKSGTSVILLDRRRPQ-----W---E                  |      |
| SDR42-1E1 | C. intestinalis | LVTGGCGYFGYKLGKVLHTLGADVTLLDIQLPQ-----KIQES                  |      |
| SDR42-1E1 | S. purpuratus   | -----                                                        |      |
| SDR42-1E2 | C. elegans      | LITGGAGHLAENLVAKLEEMTRDSIRPKIREMLEKEMPAVISTKVDKEVEKRLPMYIQIV |      |
| SDR42-2E2 | C. elegans      | VIVGGGGFLGAHVISALQKIGCKERIIVVDPCPQ-E---FKTIKID---KSNISY---   |      |
| SDR42-1E2 | C. remanei      | VITGGAGLLGSQLISSIQKNGDFTKCVVIDPTPYRP---FDTIKLD---TSFVEYIQVS  |      |
| SDR42-1E1 | A. californica  | VVTGGGGFPGFSLAKYLARKGHHVKLIDVKEPV-----W---D                  |      |

|           |                 |                                                             |           |
|-----------|-----------------|-------------------------------------------------------------|-----------|
| SDR42E1   | H. sapiens      | -----IPEGIKFIQGDIRHLSDVEKAFQDADVTCVFHIASYGMSGREQLN--R       |           |
| SDR42E2   | H. sapiens      | -----LSPETKFIqaDVRDEEALYRA--FEGVDCVFHVASYGMSGAEk1Q--K       | 1p.0 2p.0 |
| SDR42-1E1 | C. intestinalis | -----LDDHLKFIrgDIRDYDVLKS--SAGMDCVYHIASFGMSGKDq1Y--K        | 2p.0 3p.0 |
| SDR42-1E1 | S. purpuratus   | -----MTKVQRGDIRDRELLDKL--CEGVDCVFHIASYGMSGREmmKA-S          | 1p.0      |
| SDR42-1E2 | C. elegans      | LVDVLEPRGRVL-KHHVAFVkcSFDDECTMKTA--LEQVDTVYHLAAVGMTQYarDR-- | 2p.0 3p.0 |

|           |                 |                                                                |       |       |
|-----------|-----------------|----------------------------------------------------------------|-------|-------|
| SDR42-2E2 | C. elegans      | -----IkaSFLDDKVLNI--LNGASAVVHLAAVGHTGLIagDR--                  | 1p.0  | 2p.0  |
| SDR42-1E2 | C. remanei      | -----SKIDSVSYSYISIQGSFLDETVLNRV--LSNCVTVFHLCAIGHTGRFgaQKYK     |       | 1p.0  |
| SDR42-1E1 | A. californica  | -----LEANMEFIKGSICDDNQLQSV--VEGASAVYHMASYGMGREQLN--K           |       |       |
|           |                 | * * * *                                                        |       |       |
| SDR42E1   | H. sapiens      | NLIKEVNVRGTDNQLQVCQRRRVPRLVYTSTFNVIFGGQVIRNGDE-SLPYLPHLHPDH    |       |       |
| SDR42E2   | H. sapiens      | EQIESINVGGTKLVIdivCVRRRVPRLIYTSTVNVAFGGKPIEQGDEDSVPYFPLDehVDH  | 3p.2  | 4p.0  |
| SDR42-1E1 | C. intestinalis | DLTEAINVDGTRNVIkaCQMNNVQRLIYTSSYNVLEGNPIIGGDE-TLPYADPNkiVDY    | 4p.2  | 5p.0  |
| SDR42-1E1 | S. purpuratus   | DFIESINVGGTENIVeaCIKQNVPRLVYTSTHNVVFAQQDIENGDE-TLPPLPLSahKDD   | 2p.2  | 3p.0  |
| SDR42-1E2 | C. elegans      | KACMDINAVGTMNLLIWARNSGVQRFIYTSSVGVVFSGEPMYNATE-EVGYPD--dfYNY   |       | 4p.0  |
| SDR42-2E2 | C. elegans      | KSVHNFNVNGTKQLIKQCKALGVKRFYASSVAVSFIGEPLDNVTE-DDPLPDPKkyLDF    |       | 3p.0  |
| SDR42-1E2 | C. remanei      | SRAHQFNVLGTIQLIKKCKENGQVRFIYSSSIADVFTGKPLYSCNE-AEPYPKQSeYLDI   |       | 2p.0  |
| SDR42-1E1 | A. californica  | KLIEKVNIGGTEAVLkaCLSQDVTRLVYTSTYNVVFGGQEILDGDE-RLPYLTDDkfTDH   | 1p.2  | 2p.0  |
|           |                 | * ** * * * *                                                   |       |       |
|           |                 | + +                                                            |       |       |
| SDR42E1   | H. sapiens      | YSRTKSIAEQVLEANATPLDRGDGVLRTCALRPAGIYGPGEQRHLPRIVSYIEKGLFKF    |       |       |
| SDR42E2   | H. sapiens      | YSRTKAIADQLTLMANGMP-LpgGGTLRTCVLRPPGIYGPEEQRHLPRVagHIKKRLFMF   | 5p.2  | 6p.0  |
| SDR42-1E1 | C. intestinalis | YSKSKLKADKLILEANNT-LndGRQLKTCLRPAGIYGPGERRHMQRIakFIDWGIIL      | 6p.2  | 7p.0  |
| SDR42-1E1 | S. purpuratus   | YSRTKSMAEQLAMKSNGRETKkd-SILNVCVIRPVAIYGAGEQRHFPRIVkNMEQGLLCM   | 4p.2  | 5p.0  |
| SDR42-1E2 | C. elegans      | YCESKAHAERIVQKASGHR-----MRTTVLRFNNGIYGPGEKRVTERVvkFMLTGMWIA    |       | 5p.0  |
| SDR42-2E2 | C. elegans      | YSASKAEAETVYLSQSTPD-----FKTVCLRFRIYGPEDPNVTLKVanLIKNGLFIG      |       | 4p.0  |
| SDR42-1E2 | C. remanei      | YSSTKAEAESFILSQSCLD-----FKTTCILRFRAIYGPQDVSAEKVvnMVRKNLFMV     |       | 3p.0  |
| SDR42-1E1 | A. californica  | YSKTKMLAEKKVLASNGAK-TSGGATLRCCVLRLAGVYGPGLRHLPRIVsYLEQGLVKV    |       | 3p.0  |
|           |                 | * * * * *                                                      |       |       |
| SDR42E1   | H. sapiens      | VYG--DPRSLVEFVHVDNLVQAHILASEALRADKGHIASGQPYFISDGRPVNNFEFFRPL   |       |       |
| SDR42E2   | H. sapiens      | RFG--DHKARMNWVHVNHLVQAHVLAEEALTTAKGYVasGQAYYINDGESVNLFEWMAPl   | 7p.0  | 8p.0  |
| SDR42-1E1 | C. intestinalis | RIG--D--AVVDWTHVNNLIQAHLAIPLGLSKTSGYVaaGKAYFISDNRLPRVFEFLRPL   | 8p.0  | 9p.0  |
| SDR42-1E1 | S. purpuratus   | KIG--SSHIKVPWVHVDNLVNGHILAAEGLSSHKEHiaaGQVYFIADKAPVNQFEFLRPL   | 6p.0  |       |
| SDR42-1E2 | C. elegans      | TCKPNGVEAQTQLSSVANCISQLVKAEALALRWSDT--PHGQIYNIMDKTPVGTFSFWTPL  |       |       |
| SDR42-2E2 | C. elegans      | MVSAHGRESVSCASSGVNCAKAFALADQMLQNPDG--LHGraYYILDGENVGQFQFWTPL   | 5p.0  |       |
| SDR42-1E2 | C. remanei      | KISRHDHESISNMSSAENCGQAFHLANQVLAEQNG--PHGqaYFITDGETVGQYEVWSPL   | 4p.0  |       |
| SDR42-1E1 | A. californica  | TYG--PRESLVDFLHVDNLVQAHALAAEGLTEGRSYVaaGRAYFISDDKPVNNFEFFRPl   | 4p.0  | 5p.0  |
|           |                 | * * * * *                                                      |       |       |
| SDR42E1   | H. sapiens      | VEGLGYTFPSTRPLPLTLVYCFALFTEMVHFILGRLYNFQPFLLTRTEVYKTGVTHYFSLEK |       |       |
| SDR42E2   | H. sapiens      | fEKLGYSPWIVQVPTSWVYLtaAVMERLHLALRPICSLPPLLTRSevRSVAVTHTFQIAK   | 9p.2  | 10p.0 |
| SDR42-1E1 | C. intestinalis | fNGLGQEVFPQYKCPYTIYIilaILMEMLHYILKPVLVIEPLLTRNeiMKMGIDHHHKMDQ  | 10p.2 | 11p.0 |
| SDR42-1E1 | S. purpuratus   | ITGLGYRPSLIVPVWFMYIvaLLSEWLHTILKPVINFQPLMVRTelFQVAVTHHFSIEK    | 7p.2  | 8p.0  |
| SDR42-1E2 | C. elegans      | NIALGFSSSMITVPATPIRLFAY-L---SQIIADMRIDPIVSVLEVDDLNVNNTFNIEK    |       |       |
| SDR42-2E2 | C. elegans      | VIALGKQPPSFYTPYDFIKAVVPYF---QNVCGYGVFKLPPLLTKFELSILAVDNTYSIER  |       |       |
| SDR42-1E2 | C. remanei      | IRALGKTPPVHVSVPYPIVSAFVSIS---SFFCYEIFHSSPPMTRFELETTLVDNTYSIEK  |       |       |
| SDR42-1E1 | A. californica  | fEGLGYGYPVNLPLPFLPVFYfaWLTEIVHYIVSTVYNFQPILTRTEvYKTGVTHYFSVQR  | 6p.2  | 7p.0  |
|           |                 | ** * * *                                                       |       |       |
| SDR42E1   | H. sapiens      | AKKELGYKAQ-PFDLQEAWEWFKAHGHGRSSGSRDSE--CFVWDGLLVFLLI IAVL----  |       |       |
| SDR42E2   | H. sapiens      | ARAQLGYAPD-KFRFADAVELYVQSTTRRPRGSTARTLLRLLRLLLFLGLLALAL----    |       |       |
| SDR42-1E1 | C. intestinalis | AINDLGYKPM-FYDFADTVALYLKERGsVSEKSKI--AFHPLWTSVLFTIVTVIIT----   | 12p.2 |       |
| SDR42-1E1 | S. purpuratus   | AKKQLGYEPV-ERDLTDMVQYFLERGHRKKSSSIGA---FLFTVILAVLFVLLM----     |       |       |
| SDR42-1E2 | C. elegans      | AERDLGYEPS-VSAIPEiIEHYLHRLPPDVVRPKGRSD-FYVKVAVLVGLTILIFVAVFS   | 6p.0  |       |
| SDR42-2E2 | C. elegans      | ARRELGYEPE-PCVMTdvAKYYQDLENEVATA--TTE-WKSAISILIVFIS-----       | 6p.0  |       |
| SDR42-1E2 | C. remanei      | AEKELGYVPG-KNHFKktVDYRIQPIQSTTHN--FGS-WFNFDTLFLMILI-----       | 5p.0  |       |
| SDR42-1E1 | A. californica  | ARTDLGYSPTVQNDLSQVVITYYKKLGRVKGHSMPLL--FYFVNAIIFIISIFM----     |       |       |
|           |                 | * ***                                                          |       |       |
| SDR42E1   | H. sapiens      | ----MWLPSSVILSL----                                            |       |       |

```

SDR42E2  H. sapiens      ----HFLGLQPLHAAVERL
SDR42-1E1 C. intestinalis ----ISLCL-----
SDR42-1E1 S. purpuratus ----SLLPLAE-----
SDR42-1E2 C. elegans     FTFWMYLIFQRLSRWNP-F
SDR42-2E2 C. elegans     IAFLLFLFNLN-----
SDR42-1E2 C. remanei     -IFWTIISF-----
SDR42-1E1 A. californica ----HVLPRVTTD-----

```

Figure S36. Alignment of the invertebrate orthologs of the human SDR42E family variants. For further details see Fig. S25 and Table S38.

\* symbol marks the position of identical amino acid residues of the aligned SDR protein sequences.

| Species                              | Gene symbol  | Gene ID   | Chr | Variant symbol | Exons n. | Phase formula | aa  | Structure consensus | Catalytic consensus |
|--------------------------------------|--------------|-----------|-----|----------------|----------|---------------|-----|---------------------|---------------------|
| <i>Homo sapiens</i>                  | RDH11        | 51109     | 14  | SDR7C1         | 7        | 122221        | 318 | GANTGIG             | YCHSK               |
|                                      | RDH12        | 145226    |     | SDR7C2         |          |               | 316 |                     |                     |
|                                      | RDH13        | 112724    | 19  | SDR7C3         | 7        | 122222        | 331 |                     |                     |
|                                      | RDH14        | 57665     | 12  | SDR7C4         | 2        | 0             | 336 | GANSGLG             | YSRSK               |
|                                      | DHRS13       | 147015    | 17  | SDR7C5         | 5        | 2022          | 377 | GANSIG              | YADTK               |
|                                      | DHRS12       | 79758     | 13  | SDR40C1        | 10       | 120020022     | 317 | GGNSIG              | YAQNK               |
| <i>Ciona intestinalis</i>            | LOC100177351 | 100177351 | 4   | SDR7-1C1       | 6        | 22212         | 372 | GATDGVG             | YSRSK               |
|                                      | LOC100179350 | 100179350 | 3   | SDR7-1C2       | 6        | 02021         | 313 | GANAGIG             | YCRSK               |
|                                      | LOC100176936 | 100176936 | 6   | SDR7-3C2       | 7        | 100022        | 320 | GANSGLG             | YAQQK               |
|                                      | LOC100182258 | 100182258 | 7   | SDR7-3C3       | 7        | 202021        | 321 | GGNTGVG             | YSNTK               |
|                                      | LOC100178007 | 100178007 | 6   | SDR7-3C4       | 6        | 02021         | 322 | GANTGIG             | YGRSK               |
| <i>Strongylocentrotus purpuratus</i> | LOC764557    | 764557    | -   | SDR7-1C1       | 5        | 2221          | 283 | GCNTGIG             | YGQSK               |
|                                      | LOC589120    | 589120    | -   | SDR7-1C3       | 4        | 222           | 355 | GANTGIG             | YARSK               |
|                                      | LOC585181    | 585181    | -   | SDR7-2C2       | 5        | 2221          | 357 | GANAGIG             | YNRSK               |
| <i>Musca domestica</i>               | LOC101892171 | 101892171 | -   | SDR7-1C3       | 6        | 10102         | 328 | GSNTGIG             | YNQSK               |
| <i>Brugia malayi</i>                 | Bm1_24195    | 6099738   | -   | SDR7-1C1       | 8        | 2022001       | 340 | GASAGIG             | YSRSK               |
| <i>Aplysia californica</i>           | LOC101848777 | 101848777 | -   | SDR7-1C1       | 7        | 212222        | 382 | GGTSGIG             | YTRSK               |
|                                      | LOC101852273 | 101852273 | -   | SDR7-1C3       | 7        | 122221        | 344 | GANCGIG             | YGQSK               |

Table S27. Genetic and molecular data of the invertebrate orthologs of the human SDR7C family and of the SDR40C1 variants. Chr, chromosome; phase formula contains phase type symbols aligned according to the sequence of their relative splicing sites; aa n., number of the variant amino acids.

| Species                              | Gene symbol  | Gene ID:  | Chr | Variant symbol | Exons n. | Phase formula | aa n. | Structure consensus | Catalysis consensus |
|--------------------------------------|--------------|-----------|-----|----------------|----------|---------------|-------|---------------------|---------------------|
| <i>Homo sapiens</i>                  | BDH1         | 5622      | 3   | SDR9C1         | 6        | 10022         | 343   | GCDSGFG             | YCITK               |
|                                      | HSD17B2      | 3294      | 16  | SDR9C2         | 5        | 2222          | 387   | GGDCGLG             | YGSSK               |
|                                      | HSD11B2      | 3291      |     | SDR9C3         |          |               | 405   | GCDSGFG             | YGTSK               |
|                                      | DHRS9        | 10170     | 2   | SDR9C4         | 4        | 212           | 319   | GCDSGFG             | YTPSK               |
|                                      | RDH5         | 5959      | 12  | SDR9C5         |          |               | 317   |                     | YCVSK               |
|                                      | HSD17B6      | 8630      |     | SDR9C6         |          |               | 313   |                     |                     |
|                                      | SDR9C7       | 121214    |     | SDR9C7         |          |               | 317   |                     |                     |
|                                      | RDH16        | 8608      |     | SDR9C8         |          |               | 317   |                     | YCISK               |
| <i>Ciona intestinalis</i>            | LOC100175276 | 100175276 | -   | SDR9-1C2       | 5        | 2222          | 383   | GCDIPNSYG           | YSASK               |
| <i>Strongylocentrotus purpuratus</i> | LOC581727    | 581727    | -   | SDR9-1C2       | 6        | 21212         | 327   | GCDTGFG             | YCESK               |
| <i>Caenorhabditis elegans</i>        | dhs-20       | 17959     | v   | SDR9-1C2       | 5        | 1012          | 342   | GCDTGFG             | YVVSK               |
|                                      | drd-5        | 186315    | X   | SDR9-1C4       | 7        | 200112        | 331   | GCDSGFG             | YCVSK               |
| <i>Aplysia californica</i>           | LOC101862944 | 101862944 | -   | SDR9-1C2       | 7        | 212222        | 394   | GCDSGFG             | YSMSK               |
|                                      | LOC101861767 | 101861767 | -   | SDR9-1C5       | 5        | 1212          | 322   | GCDTGFG             | YCTSK               |

Table S28. Genetic and molecular data of the invertebrate orthologs of the human SDR9C family variants. The atypical structure consensus of *Ciona intestinalis* is highlighted in turquoise. For further details see Table S27.

| Species                              | Gene symbol     | Gene ID   | Chr | Variant symbol | Exons n. | Phase formula | aa n. | Structure consensus | Catalysis consensus |
|--------------------------------------|-----------------|-----------|-----|----------------|----------|---------------|-------|---------------------|---------------------|
| <i>Homo sapiens</i>                  | FAR1            | 84188     | 11  | SDR10E1        | 11       | 0110012101    | 515   | GATGFLG             | YIYTK               |
|                                      | FAR2            | 55711     | 12  | SDR10E2        |          |               |       |                     | YTYTK               |
| <i>Ciona intestinalis</i>            | LOC100177355    | 100177355 | 12  | SDR10-1E1      | 12       | 0121022110    | 584   | GATGFIG             | YTLTK               |
|                                      | LOC100179698    | 100179698 | 12  | SDR10-2E1      | 12       | 00121022110   | 573   | GGTGFLG             | YTLTK               |
| <i>Strongylocentrotus purpuratus</i> | LOC584999       | 584999    | -   | SDR10-1E1      | 11       | 0010010012    | 644   | GATGFIG             | YTFTK               |
| <i>Drosophila melanogaster</i>       | CG5065          | 36860     | 2R  | SDR10-1E1      | 9        | 00000021      | 625   | GGTGFMG             | YTFTK               |
| <i>Anopheles gambiae</i>             | AgaP_AGAP002279 | 1269279   | 2R  | SDR10-1E1      | 4        | 111           | 543   | GATGFMG             | YAYTK               |
| <i>Apis mellifera</i>                | FAR1            | 551233    | -   | SDR10-1E1      | 5        | 0011          | 516   | GGTGFMG             | YTFTK               |
| <i>Caenorhabditis elegans</i>        | fard-1          | 180582    | X   | SDR10-1E1      | 11       | 0000010111    | 536   | GGTGFLG             | YTLTK               |
| <i>Aplysia californica</i>           | LOC101853321    | 101853321 | -   | SDR10-1E1      | 10       | 001221101     | 671   | GGTGFBG             | YTYTK               |

Table S29. Genetic and molecular data of the invertebrate orthologs of the human SDR10E family variants. For further details see Table S27.

| Species                              | Gene Symbol  | Gene ID   | Chr | Variant symbol | Exons n. | Phase formula | aa n. | Structure consensus | Catalysis consensus |
|--------------------------------------|--------------|-----------|-----|----------------|----------|---------------|-------|---------------------|---------------------|
| <i>Homo sapiens</i>                  | HSD3B1       | 3283      | 1   | SDR11E1        | 3        | 22            | 375   | GAGGFLG             | YPHSK               |
|                                      | HSD3B2       | 3284      |     | SDR11E2        |          |               | 372   | GAGGLLG             | YPYSK               |
|                                      | HSD3B7       | 80270     | 16  | SDR11E3        | 6        | 22102         | 369   | GGCGFLG             | YPCSK               |
| <i>Strongylocentrotus purpuratus</i> | LOC592634    | 592634    | -   | SDR11-1E1      | 3        | 22            | 366   | GASGFLG             | YATTK               |
| <i>Drosophila arizonae</i>           | LOC108612818 | 108612818 | 4   | SDR11-1E1      | 3        | 22            | 380   | GGSGFLG             | YSSSK               |
| <i>Caenorhabditis briggsae</i>       | CBG02636     | 8572428   | II  | SDR11-1E1      | 7        | 221000        | 357   | GGAGLVG             | YPRNY               |

Table S30. Genetic and molecular data of the invertebrate orthologs of the human SDR11E family variants. For further details see Table S27. The atypical tyrosine (Y) of the *Caenorhabditis briggsae* is highlighted in turquoise.

| Species                              | Gene Symbol     | Gene ID   | Chr | Variant symbol | Exons n. | Phase formula | aa n. | Structure consensus | Catalysis consensus |
|--------------------------------------|-----------------|-----------|-----|----------------|----------|---------------|-------|---------------------|---------------------|
| <i>Homo sapiens</i>                  | HSD17B12        | 51144     | 11  | SDR12C1        | 11       | 2022001000    | 312   | GSTDGIG             | YSATK               |
|                                      | HSD17B3         | 3293      | 9   | SDR12C2        |          |               | 310   | GAGDGIG             | YSASK               |
|                                      | HSDL1           | 83693     | 16  | SDR12C3        | 4        | 100           | 330   | GATDGIG             | FSASK               |
| <i>Ciona intestinalis</i>            | LOC100179389    | 100179389 | 14  | SDR12-1C1      | 6        | 21100         | 335   | GCSSGIG             | YSSTK               |
|                                      | LOC100176329    | 100176329 | 3   | SDR12-2C1      | 7        | 202000        | 310   | GCTSGIG             | YGATK               |
| <i>Strongylocentrotus purpuratus</i> | LOC583990       | 583990    | -   | SDR12-1C1      | 7        | 222000        | 356   | GSTDGIG             | YSACK               |
|                                      | LOC574750       | 574750    | -   | SDR12-2C1      | 7        | 001000        | 242   | GASEGIG             | YAGTK               |
| <i>Drosophila arizonae</i>           | LOC108610536    | 108610536 | 3   | SDR12-1C1      | 5        | 2220          | 335   | GATDGIG             | YAASK               |
| <i>Drosophila ananassae</i>          | Dana\GF21190    | 6503875   | -   | SDR12-1C1      | 5        | 2020          | 318   | GSTDGIG             | YSSTK               |
| <i>Anopheles gambiae</i>             | AgaP_AGAP004532 | 1274678   | 2R  | SDR12-1C1      | 4        | 202           | 329   | GATDGIG             | YAASK               |
|                                      | AgaP_AGAP008570 | 1275433   | 3R  | SDR12-2C1      | 4        | 220           | 330   | GSTDGIG             | YAATK               |

|                               |                 |           |     |           |   |          |     |                 |       |
|-------------------------------|-----------------|-----------|-----|-----------|---|----------|-----|-----------------|-------|
|                               | AgaP_AGAP007879 | 4578212   | 3R  | SDR12-3C1 | 3 | 22       | 316 | GASD <b>GIG</b> | YAASK |
| <i>Apis mellifera</i>         | LOC410227       | 410227    | -   | SDR12-1C1 | 5 | 1220     | 359 | GSTD <b>GIG</b> | YSATK |
| <i>Caenorhabditis elegans</i> | let-767         | 175895    | III | SDR12-1C1 | 5 | 2200     | 337 | GATD <b>GIG</b> | YSATK |
| <i>Caenorhabditis remanei</i> | CRE_05435       | 9824494   | -   | SDR12-1C1 | 4 | 200      | 215 | GATD <b>GIG</b> | YSASK |
| <i>Aplysia californica</i>    | LOC101847547    | 101847547 | -   | SDR12-1C1 | 9 | 20200000 | 315 | GCTD <b>GIG</b> | YSGTK |
|                               | LOC101853549    | 101853549 | -   | SDR12-2C1 | 6 | 22200    | 361 | GSSE <b>GIG</b> | YSATK |

Table S31. Genetic and molecular data of the invertebrate orthologs of the human SDR12C family variants. The atypical phenylalanine (F) of the human catalysis consensus is highlighted in turquoise. For further details see Tables S27 and Consensuses in Online Resources 1.

| Species                              | Gene Symbol     | Gene ID   | Chr | Variant symbol | Exons n. | Phase formula | aa n. | Structure consensus | Catalysis consensus |
|--------------------------------------|-----------------|-----------|-----|----------------|----------|---------------|-------|---------------------|---------------------|
| <i>Homo sapiens</i>                  | SDR16C1         | 9249      | 1   | SDR16C1        | 6        | 00011         | 302   | GGGR <b>GIG</b>     | YCTSK               |
|                                      | SDR16C2         | 51170     | 4   | SDR16C2        | 7        | 000111        | 300   | GAGH <b>GIG</b>     | YCSSK               |
|                                      | SDR16C3         | 345275    |     | SDR16C3        |          |               |       |                     |                     |
|                                      | SDR16C4         | 157506    | 8   | SDR16C4        | 6        | 20011         | 341   | GAGSG <b>LIG</b>    | YCASK               |
|                                      | SDR16C5         | 195814    |     | SDR16C5        |          | 00211         | 309   |                     |                     |
| <i>Ciona intestinalis</i>            | LOC100185899    | 100185899 | -   | SDR16-1C1      | 7        | 000111        | 304   | GAGSG <b>GIG</b>    | YCASK               |
| <i>Strongylocentrotus purpuratus</i> | LOC755823       | 755823    | -   | SDR16-1C1      | 5        | 2011          | 311   | GAGSG <b>GIG</b>    | YCMSK               |
|                                      | LOC581999       | 581999    | -   | SDR16-1C2      | 4        | 101           | 311   | GGGM <b>GIG</b>     | YCASK               |
|                                      | LOC589689       | 589689    | -   | SDR16-1C3      | 5        | 2011          | 334   | GAGSG <b>GIG</b>    | YCMSK               |
| <i>Drosophila melanogaster</i>       | CG9265          | 35369     | 2L  | SDR16-1C1      | 8        | 1200011       | 399   | GGGN <b>LIG</b>     | YCASK               |
| <i>Anopheles gambiae</i>             | AgaP_AGAP010232 | 1279655   | 3R  | SDR16-1C1      | 8        | 0200011       | 298   | GGGG <b>LIG</b>     | YCSSK               |
| <i>Apis mellifera</i>                | LOC552689       | 552689    | -   | SDR16-1C1      | 7        | 220011        | 326   | GGAG <b>GIG</b>     | YSATK               |
| <i>Caenorhabditis elegans</i>        | dhs-4           | 172810    | I   | SDR16-1C1      | 7        | 020011        | 305   | GAGN <b>LIG</b>     | YSSTK               |
|                                      | dhs-3           | 172603    | I   | SDR16-1C2      | 7        | 202001        | 307   | GGSG <b>LIG</b>     | YCASK               |
|                                      | dhs-19          | 179578    | V   | SDR16-1C3      | 4        | 201           | 307   | GGSG <b>GIG</b>     | YCASK               |
| <i>Aplysia californica</i>           | LOC101846838    | 101846838 | -   | SDR16-1C1      | 6        | 00111         | 309   | GAGSG <b>GIG</b>    | YCASK               |
|                                      | LOC101853580    | 101853580 | -   | SDR16-1C2      | 6        | 10111         | 315   | GAGSG <b>MG</b>     | YSASK               |

Table S32. Genetic and molecular data of the invertebrate orthologs of the human SDR16C family variants. For further details see Table S27.

| Species                              | Gene symbol  | Gene ID   | Chr | Variant symbol | Exons n. | Phase formula | aa n. | Structure consensus | Catalysis Consensus |
|--------------------------------------|--------------|-----------|-----|----------------|----------|---------------|-------|---------------------|---------------------|
| <i>Homo sapiens</i>                  | CBR1         | 873       | 21  | SDR21C1        | 3        | 22            | 277   | GGNK <b>GIG</b>     | YGVTK               |
|                                      | CBR3         | 874       |     | SDR21C2        |          |               |       | GANK <b>GIG</b>     | YGVSK               |
| <i>Ciona intestinalis</i>            | LOC100182286 | 100182286 | -   | SDR21-1C1      | 1        | -             | 275   | GSNR <b>LIG</b>     | YGVSK               |
| <i>Strongylocentrotus purpuratus</i> | LOC755162    | 755162    | -   | SDR21-1C1      | 6        | 00110         | 278   | GANK <b>GIG</b>     | YGVSK               |
| <i>Megachile rotundata</i>           | LOC100877141 | 100877141 | -   | SDR21-1C1      | 4        | 201           | 276   | GGNK <b>GIG</b>     | YVASK               |
| <i>Aplysia californica</i>           | LOC101846277 | 101846277 | -   | SDR21-1C2      | 8        | 0201102       | 281   | GSNK <b>GIG</b>     | YGISK               |

Table S33. Genetic and molecular data of the invertebrate orthologs of the human SDR21C family variants. For further details see Table S27.

| Species                              | Gene symbol  | Gene ID   | Chr | Variant symbol | Exons n. | Phase formula | aa n. | Structure consensus | Catalysis consensus |
|--------------------------------------|--------------|-----------|-----|----------------|----------|---------------|-------|---------------------|---------------------|
| <i>Homo sapiens</i>                  | DHRS2        | 10202     | 14  | SDR25C1        | 8        | 1001001       | 280   | GSTSGIG             | YNVSK               |
|                                      | DHRS4        | 10901     |     | SDR25C2        |          |               | 278   | ASTDGIG             |                     |
| <i>Strongylocentrotus purpuratus</i> | LOC764565    | 764565    | -   | SDR25-1C1      | 6        | 00010         | 278   | ASTEGIG             | YSVSK               |
| <i>Drosophila melanogaster</i>       | CG10672      | 38598     | 3L  | SDR25-1C1      | 3        | 10            | 317   | ASTDGIG             | YSVSK               |
| <i>Apis mellifera</i>                | DHRS4        | 412304    | -   | SDR25-1C1      | 5        | 1000          | 272   | ASTQGIG             | YSISK               |
| <i>Caenorhabditis elegans</i>        | dhrs-4       | 179772    | V   | SDR25-1C1      | 3        | 100           | 260   | AATKGIG             | YGVTK               |
| <i>Aplysia californica</i>           | LOC101862311 | 101862311 | -   | SDR25-1C1      | 8        | 2000100       | 253   | ASTDGIG             | YSLTK               |

Table S34. Genetic and molecular data of the invertebrate orthologs of the human SDR25C family variants. For further details see Table S27 and Consensuses in Online Resources 1.

| Species                              | Gene symbol  | Gene ID   | Chr | Variant symbol | Exons n. | Phase formula | aa n. | Structure consensus | Catalysis Consensus |
|--------------------------------------|--------------|-----------|-----|----------------|----------|---------------|-------|---------------------|---------------------|
| <i>Homo sapiens</i>                  | SDR26C1      | 3290      | 1   | SDR26C1        | 6        | 20222         | 292   | GASKGIG             | YSASK               |
|                                      | SDR26C2      | 374875    | 19  | SDR26C2        | 7        | 202022        | 315   | GANAGVG             | YSAAK               |
| <i>Ciona intestinalis</i>            | LOC100176102 | 100176102 | 7   | SDR26-1C2      | 8        | 2021212       | 292   | GASQNGIG            | YGATK               |
|                                      | LOC100179203 | 100179203 | 9   | SDR26-1C4      | 6        | 20222         | 287   | GASSGIG             | YTTTK               |
| <i>Strongylocentrotus purpuratus</i> | LOC580541    | 580541    | -   | SDR26-1C1      | 7        | 200001        | 348   | GASSGIG             | YCASK               |

Table S35. Genetic and molecular data of the invertebrate orthologs of the human SDR26C family variants. The atypical asparagine (N) of *Ciona intestinalis* structure consensus is highlighted in turquoise. For further details see Table S27.

| Species                              | Gene symbol  | Gene ID   | Chr | Variant symbol | Exons n. | Phase formula | aa n. | Structure consensus | Catalysis Consensus |
|--------------------------------------|--------------|-----------|-----|----------------|----------|---------------|-------|---------------------|---------------------|
| <i>Homo sapiens</i>                  | HSD17B1      | 3292      | 17  | SDR28C1        | 6        | 22210         | 328   | GCSSGIG             | YCASK               |
|                                      | RDH8         | 50700     | 19  | SDR28C2        |          |               | 331   |                     | YAASK               |
| <i>Ciona intestinalis</i>            | LOC100176396 | 100176396 | 1   | SDR28-1C2      | 8        | 2221001       | 389   | GCDSGFG             | YGITK               |
| <i>Strongylocentrotus purpuratus</i> | LOC762727    | 762727    | -   | SDR28-1C1      | 4        | 221           | 266   | GCSTGIG             | YNASK               |
|                                      | LOC592953    | 592953    | -   | SDR28-1C2      | 5        | 2210          | 283   | GCSTGIG             | YNASK               |
|                                      | LOC577205    | 577205    | -   | SDR28-1C3      | 4        | 210           | 291   | GCSTGIG             | YSASK               |
| <i>Aplysia californica</i>           | LOC101854946 | 101854946 | -   | SDR28-1C1      | 5        | 0200          | 322   | GASSGIG             | YTGSK               |

Table S36. Genetic and molecular data of the invertebrate orthologs of the human SDR28C family variants. For further details see Table S27.

| Species                              | Gene symbol       | Gene ID   | Chr | Variant symbol | Exons n. | Phase formula | aa n. | Structure consensus | Catalysis consensus |
|--------------------------------------|-------------------|-----------|-----|----------------|----------|---------------|-------|---------------------|---------------------|
| <i>Homo sapiens</i>                  | DHRS7B            | 25979     | 17  | SDR32C1        | 6        | 120222        | 325   | GATSGLG             | YAASK               |
|                                      | DHRS7C            | 201140    |     | SDR32C2        | 11       | 20222         | 312   | DAISGLG             |                     |
| <i>Ciona intestinalis</i>            | LOC104266214      | 104266214 | 11  | SDR32C-1C2     | 7        | 200220        | 256   | GASSGIG             | YSMTK               |
| <i>Strongylocentrotus purpuratus</i> | LOC588555         | 588555    | -   | SDR32C-1C1     | 6        | 22222         | 314   | GASSGVG             | YSASK               |
| <i>Drosophila busckii</i>            | LOC108603035      | 108603035 | 3R  | SDR32C-1C1     | 5        | 0022          | 326   | GASSGLG             | YSASK               |
| <i>Anopheles gambiae</i>             | DHRS7 ANOGA       | 1276215   | 2L  | SDR32C-1C1     | 4        | 002           | 317   | GASSGLG             | YSASK               |
| <i>Apis dorsata</i>                  | LOC102677319      | 102677319 | -   | SDR32C-1C1     | 6        | 00212         | 317   | GASSGLG             | YAASK               |
| <i>Helobdella robusta</i>            | HELRODRAFT_194864 | 20213175  | -   | SDR32C-1C1     | 6        | 22122         | 306   | GASSGIG             | YSASK               |
| <i>Aplysia californica</i>           | LOC101858248      | 101858248 | -   | SDR32C-1C1     | 6        | 20222         | 312   | GASSGLG             | YAASK               |

Table S37. Genetic and molecular data of the invertebrate orthologs of the human SDR32C family variants. The atypical aspartate (N) of *Ciona intestinalis* structure consensus is highlighted in turquoise. For further details see Table S27 and Consensuses in Online Resources 1.

| Species                              | Gene symbol  | Gene ID   | Chr | Variant symbol | Exons N. | Phase formula | aa n. | Structure consensus | Catalysis consensus |
|--------------------------------------|--------------|-----------|-----|----------------|----------|---------------|-------|---------------------|---------------------|
| <i>Homo Sapiens</i>                  | SDR42E1      | 93517     | 16  | SDR42E1        | 2        | 1             | 393   | GGSGYFG             | YSRTK               |
|                                      | SDR42E2      | 100288072 |     | SDR42E2        | 12       | 0020200020    | 626   | GGGGYLG             |                     |
| <i>Ciona intestinalis</i>            | LOC100186801 | 100186801 | -   | SDR42E-1E1     | 13       | 100202000202  | 406   | GGCGYFG             | YSKSK               |
| <i>Strongylocentrotus purpuratus</i> | LOC575739    | 575739    | -   | SDR42E-1E1     | 9        | 02020020      | 334   | -                   | YSRTK               |
| <i>Caenorhabditis elegans</i>        | hsd-1        | 189371    | I   | SDR42E-1E1     | 6        | 20000         | 462   | GGAGHLA             | YCESK               |
|                                      | hsd-2        | 191049    | X   | SDR42E-1E2     | 7        | 000000        | 374   | GGGGFLG             | YSASK               |
| <i>Caenorhabditis remanei</i>        | Cre-hsd-3    | 9824419   | -   | SDR42E-1E1     | 6        | 00000         | 390   | GGAGLLG             | YSSTK               |
| <i>Aplysia californica</i>           | LOC101864466 | 101864466 | -   | SDR42E-1E1     | 8        | 2000020       | 394   | GGGGFPG             | YSKTK               |

Table S38. Genetic and molecular data of the invertebrate orthologs of the human SDR42E family variants. The atypical (A) alanine of *Caenorhabditis elegans* structure consensus is highlighted in turquoise. For further details see Table S27.



| Species                              | Variants  | Phase formula | Splicing-site phases |   |   |   |   |   |  |   |  |  |  |  |   |   |   |  |  |   |  |  |  |  |  |  |  |  |  |   |  |  |  |   |  |
|--------------------------------------|-----------|---------------|----------------------|---|---|---|---|---|--|---|--|--|--|--|---|---|---|--|--|---|--|--|--|--|--|--|--|--|--|---|--|--|--|---|--|
| <i>Homo sapiens</i>                  | SDR7C1    | 122221        |                      |   | 1 |   | 2 |   |  |   |  |  |  |  | 2 |   |   |  |  | 2 |  |  |  |  |  |  |  |  |  |   |  |  |  | 1 |  |
|                                      | SDR7C2    |               |                      |   | 1 |   | 2 |   |  |   |  |  |  |  | 2 |   |   |  |  | 2 |  |  |  |  |  |  |  |  |  |   |  |  |  | 1 |  |
|                                      | SDR7C3    |               | 122222               |   |   | 1 |   | 2 |  |   |  |  |  |  | 2 |   |   |  |  | 2 |  |  |  |  |  |  |  |  |  | 2 |  |  |  |   |  |
|                                      | SDR7C4    | 0             |                      |   |   |   |   |   |  |   |  |  |  |  |   |   |   |  |  |   |  |  |  |  |  |  |  |  |  |   |  |  |  |   |  |
|                                      | SDR7C5    | 2022          |                      |   |   |   | 2 |   |  | 0 |  |  |  |  |   |   |   |  |  |   |  |  |  |  |  |  |  |  |  |   |  |  |  |   |  |
|                                      | SDR40C1   | 120020022     |                      | 1 |   |   |   |   |  |   |  |  |  |  |   | 0 |   |  |  |   |  |  |  |  |  |  |  |  |  |   |  |  |  | 2 |  |
| <i>Ciona intestinalis</i>            | SDR7C-1C1 | 22212         |                      |   |   |   | 2 |   |  |   |  |  |  |  |   |   |   |  |  |   |  |  |  |  |  |  |  |  |  |   |  |  |  |   |  |
|                                      | SDR7C-1C2 | 02021         |                      |   |   |   |   |   |  |   |  |  |  |  |   |   |   |  |  |   |  |  |  |  |  |  |  |  |  |   |  |  |  |   |  |
|                                      | SDR7C-3C2 | 100022        |                      | 1 |   |   |   |   |  |   |  |  |  |  |   |   |   |  |  |   |  |  |  |  |  |  |  |  |  |   |  |  |  |   |  |
|                                      | SDR7C-3C3 | 202021        |                      |   |   |   |   |   |  |   |  |  |  |  |   |   |   |  |  |   |  |  |  |  |  |  |  |  |  |   |  |  |  | 2 |  |
|                                      | SDR7C-3C4 | 02021         |                      |   |   |   |   |   |  |   |  |  |  |  |   |   |   |  |  |   |  |  |  |  |  |  |  |  |  |   |  |  |  |   |  |
| <i>Strongylocentrotus purpuratus</i> | SDR7C-1C1 | 2221          |                      |   |   |   |   |   |  |   |  |  |  |  |   |   |   |  |  |   |  |  |  |  |  |  |  |  |  |   |  |  |  |   |  |
|                                      | SDR7C-1C3 | 122221        |                      |   |   | 1 |   |   |  |   |  |  |  |  |   | 2 |   |  |  |   |  |  |  |  |  |  |  |  |  |   |  |  |  |   |  |
|                                      | SDR7C-2C2 | 222           |                      |   |   |   | 2 |   |  |   |  |  |  |  |   |   |   |  |  |   |  |  |  |  |  |  |  |  |  |   |  |  |  |   |  |
| <i>Musca domestica</i>               | SDR7C-1C3 | 10102         |                      |   |   | 1 |   |   |  |   |  |  |  |  |   |   |   |  |  |   |  |  |  |  |  |  |  |  |  |   |  |  |  |   |  |
| <i>Brugia malayi</i>                 | SDR7C-1C1 | 2022001       |                      |   |   |   |   |   |  |   |  |  |  |  |   |   | 0 |  |  |   |  |  |  |  |  |  |  |  |  |   |  |  |  |   |  |
| <i>Aplysia californica</i>           | SDR7C-1C2 | 212222        |                      |   |   |   | 2 |   |  |   |  |  |  |  |   |   |   |  |  |   |  |  |  |  |  |  |  |  |  |   |  |  |  |   |  |
|                                      | SDR7C-1C3 | 122221        | 1                    |   |   |   |   |   |  |   |  |  |  |  |   |   |   |  |  |   |  |  |  |  |  |  |  |  |  |   |  |  |  |   |  |

Table S39a. Splicing site organization of the human SDR7C family, of the SDR40C1 variants, and of their respective invertebrate orthologs. The phase type symbols are aligned according to the sequence of their relative splicing sites. Phase symbols, in a same column and highlighted in green or pink, mark the orthologous splicing sites. Note, this figure is identical to Table S2a in the main text.

| Species                    | Variants  | % identity |        |        |        |         |         |
|----------------------------|-----------|------------|--------|--------|--------|---------|---------|
|                            |           | SDR7C1     | SDR7C2 | SDR7C3 | SDR7C4 | SDR7C5H | SDR40C1 |
| <i>Homo sapiens</i>        | SDR7C2    | 71.66      |        |        |        |         |         |
|                            | SDR7C3    | 49.20      | 48.89  |        |        |         |         |
|                            | SDR7C4    | 45.31      | 46.75  | 48.72  |        |         |         |
|                            | SDR7C5H   | 45.87      | 47.21  | 42.01  | 45.39  |         |         |
|                            | SDR40C1   | 30.20      | 31.00  | 28.05  | 28.72  | 26.33   |         |
|                            |           |            |        |        |        |         |         |
| <i>Ciona</i>               | SDR7C-1C1 | 37.26      | 38.78  | 34.46  | 36.31  | 35.62   | 26.40   |
|                            | SDR7C-1C2 | 46.05      | 48.11  | 47.68  | 46.08  | 36.79   | 24.64   |
|                            | SDR7C-3C2 | 26.00      | 27.48  | 25.25  | 26.51  | 25.83   | 54.57   |
|                            | SDR7C-3C3 | 36.69      | 35.48  | 33.02  | 32.57  | 34.50   | 25.33   |
|                            | SDR7C-3C4 | 46.25      | 46.93  | 44.73  | 46.91  | 39.54   | 23.67   |
| <i>Strongylocentrotus</i>  | SDR7C-1C1 | 54.12      | 53.76  | 53.36  | 50.53  | 44.04   | 30.71   |
|                            | SDR7C-1C3 | 47.17      | 47.78  | 59.09  | 48.90  | 40.30   | 29.61   |
|                            | SDR7C-2C2 | 42.49      | 42.77  | 42.86  | 42.44  | 45.02   | 27.63   |
| <i>Musca domestica</i>     | SDR7C-1C3 | 49.37      | 51.91  | 53.92  | 47.78  | 44.52   | 31.25   |
| <i>Brugia malayi</i>       | SDR7C-1C1 | 36.77      | 39.48  | 38.54  | 41.40  | 33.66   | 27.67   |
| <i>Aplysia californica</i> | SDR7C-1C2 | 39.81      | 41.04  | 41.38  | 36.86  | 33.13   | 29.24   |
|                            | SDR7C-1C3 | 49.05      | 46.47  | 52.05  | 47.34  | 40.26   | 28.57   |

Table S39b. Percent identity values of the human SDR7C family, of the SDR40C1 variants and of their invertebrate orthologs. Note, this figure is identical to Table S2b in the main text.

| Species                              | Variants | Phase formula | Splicing-site phases |   |   |   |   |  |   |   |   |   |   |   |  |   |   |   |
|--------------------------------------|----------|---------------|----------------------|---|---|---|---|--|---|---|---|---|---|---|--|---|---|---|
| <i>Homo sapiens</i>                  | SDR9C1   | 10022         |                      | 1 |   |   | 0 |  |   |   | 0 |   |   | 2 |  | 2 |   |   |
|                                      | SDR9C2   | 2222          |                      |   |   |   |   |  | 2 |   |   |   | 2 |   |  | 2 |   |   |
|                                      | SDR9C3   |               |                      |   |   |   |   |  | 2 |   |   |   | 2 |   |  | 2 |   |   |
|                                      | SDR9C4   | 212           |                      |   |   |   |   |  |   |   |   |   | 2 |   |  | 1 |   | 2 |
|                                      | SDR9C5   |               |                      |   |   |   |   |  |   |   |   |   | 2 |   |  | 1 |   | 2 |
|                                      | SDR9C6   |               |                      |   |   |   |   |  |   |   |   |   | 2 |   |  | 1 |   | 2 |
|                                      | SDR9C7   |               |                      |   |   |   |   |  |   |   |   |   | 2 |   |  | 1 |   | 2 |
|                                      | SDR9C8   |               |                      |   |   |   |   |  |   |   |   |   | 2 |   |  | 1 |   | 2 |
| <i>Ciona intestinalis</i>            | SDR9-1C2 | 2222          |                      |   |   |   |   |  | 2 |   |   |   | 2 |   |  | 2 | 2 |   |
| <i>Strongylocentrotus purpuratus</i> | SDR9-1C2 | 21212         | 2                    |   |   |   | 1 |  |   |   |   | 2 |   |   |  | 1 |   | 2 |
| <i>Caenorhabditis elegans</i>        | SDR9-1C2 | 1012          |                      |   |   | 1 |   |  |   |   | 0 |   |   |   |  | 1 |   | 2 |
|                                      | SDR9-1C4 | 200112        |                      |   | 2 |   |   |  |   |   | 0 |   | 0 | 1 |  | 1 |   | 2 |
| <i>Aplysia californica</i>           | SDR9-1C2 | 212222        |                      |   |   |   |   |  | 2 |   |   | 1 | 2 |   |  | 2 | 2 |   |
|                                      | SDR9-1C5 | 1212          |                      |   |   |   |   |  |   | 1 |   |   | 2 |   |  |   | 1 | 2 |

Table S40a. Splicing site organization of the human SDR9C family variants and of their invertebrate orthologs. For further details see Table S39a.

| Species                              | Variants | % identity |        |        |        |        |        |        |        |
|--------------------------------------|----------|------------|--------|--------|--------|--------|--------|--------|--------|
| <i>Homo sapiens</i>                  |          | SDR9C1     | SDR9C2 | SDR9C3 | SDR9C4 | SDR9C5 | SDR9C6 | SDR9C7 | SDR9C8 |
|                                      | SDR9C2   | 31.50      |        |        |        |        |        |        |        |
|                                      | SDR9C3   | 31.29      | 38.54  |        |        |        |        |        |        |
|                                      | SDR9C4   | 36.33      | 30.57  | 30.03  |        |        |        |        |        |
|                                      | SDR9C5   | 35.12      | 29.17  | 30.87  | 43.63  |        |        |        |        |
|                                      | SDR9C6   | 38.67      | 31.09  | 31.83  | 44.90  | 49.37  |        |        |        |
|                                      | SDR9C7   | 36.36      | 32.47  | 30.29  | 44.19  | 47.76  | 50.80  |        |        |
|                                      | SDR9C8   | 37.67      | 32.05  | 32.48  | 46.18  | 51.58  | 66.25  | 51.76  |        |
| <i>Ciona intestinalis</i>            | SDR9-1C2 | 34.63      | 32.66  | 31.21  | 28.28  | 29.31  | 35.07  | 31.94  | 32.99  |
| <i>Strongylocentrotus purpuratus</i> | SDR9-1C2 | 35.76      | 31.76  | 28.62  | 43.65  | 41.37  | 43.32  | 40.92  | 46.25  |
| <i>Caenorhabditis elegans</i>        | SDR9-1C2 | 35.14      | 26.67  | 29.13  | 34.17  | 34.91  | 37.54  | 34.82  | 37.54  |
|                                      | SDR9-1C4 | 32.03      | 27.73  | 26.17  | 34.82  | 33.33  | 35.37  | 35.50  | 36.01  |
| <i>Aplysia californica</i>           | SDR9-1C2 | 35.89      | 31.72  | 32.89  | 34.50  | 34.41  | 34.08  | 33.88  | 33.12  |
|                                      | SDR9-1C5 | 34.54      | 30.89  | 27.16  | 34.49  | 36.59  | 39.12  | 38.98  | 39.43  |

Table S40b. Percent identity values of the human SDR9C family variants and of their invertebrate orthologs.

| Species                              | Variants  | Phase formula | Splicing-site phase |   |   |   |   |  |   |   |   |   |  |   |   |   |  |   |   |   |   |   |   |   |   |   |   |   |   |   |   |
|--------------------------------------|-----------|---------------|---------------------|---|---|---|---|--|---|---|---|---|--|---|---|---|--|---|---|---|---|---|---|---|---|---|---|---|---|---|---|
| <i>H. sapiens</i>                    | SDR10E1   | 0110012101    |                     |   |   | 0 |   |  |   | 1 |   |   |  | 1 |   |   |  | 0 | 0 |   |   | 1 | 2 |   |   |   | 1 | 0 | 1 |   |   |
|                                      | SDR10E2   |               |                     |   |   | 0 |   |  |   | 1 |   |   |  | 1 |   |   |  | 0 | 0 |   |   | 1 | 2 |   |   |   | 1 | 0 | 1 |   |   |
| <i>Ciona intestinalis</i>            | SDR10-1E1 | 0121022110    |                     |   |   | 0 |   |  |   | 1 | 2 |   |  |   | 1 |   |  | 0 |   |   | 2 |   |   |   | 1 |   | 1 | 0 | 1 |   |   |
|                                      | SDR10-2E1 | 00121022110   |                     | 0 |   | 0 |   |  |   | 1 | 2 |   |  |   | 1 |   |  | 0 |   |   | 2 |   | 2 |   |   | 1 |   | 1 | 0 | 1 |   |
| <i>Strongylocentrotus purpuratus</i> | SDR10-1E1 | 0010010012    | 0                   |   |   | 0 |   |  | 1 | 0 |   | 0 |  |   | 1 |   |  |   | 0 | 0 |   |   | 1 | 2 |   |   | 1 |   | 1 | 0 | 1 |
| <i>Drosophila melanogaster</i>       | SDR10-1E1 | 00000021      |                     |   | 0 |   | 0 |  |   |   | 0 |   |  |   | 0 |   |  |   |   |   |   |   |   |   |   | 2 |   |   | 1 | 0 | 1 |
| <i>Anopheles gambiae</i>             | SDR10-1E1 | 111           |                     |   |   | 0 |   |  |   |   |   |   |  |   |   | 1 |  |   |   |   |   |   |   |   |   |   |   | 1 |   | 1 |   |
| <i>Apis mellifera</i>                | SDR10-1E1 | 0011          |                     |   |   | 0 |   |  |   |   | 0 |   |  |   |   |   |  |   |   |   | 1 |   |   |   |   |   |   |   |   | 1 |   |
| <i>Caenorhabditis elegans</i>        | SDR10-1E1 | 0000010111    |                     |   |   | 0 |   |  | 0 |   |   | 0 |  | 0 |   |   |  |   |   |   |   |   | 1 |   | 0 |   |   | 1 |   | 1 |   |
| <i>Aplysia californica</i>           | SDR10-1E1 | 001221101     |                     |   |   | 0 |   |  |   |   |   | 0 |  |   | 1 |   |  |   | 0 |   |   |   | 2 |   |   | 1 | 1 |   |   | 0 | 1 |

Table S41a. Splicing site organization of the human SDR10E family variants and of their invertebrate orthologs. For further details see Table S39a.

| Species                              | Variants  | % identity |         |
|--------------------------------------|-----------|------------|---------|
|                                      |           | SDR10E1    | SDR10E2 |
| <i>Homo sapiens</i>                  | SDR10E2   | 59.03      |         |
| <i>Ciona intestinalis</i>            | SDR10-1E1 | 37.74      | 34.63   |
|                                      | SDR10-2E1 | 35.58      | 34.36   |
| <i>Strongylocentrotus purpuratus</i> | SDR10-1E1 | 52.72      | 47.47   |
| <i>Drosophila melanogaster</i>       | SDR10-1E1 | 38.82      | 38.43   |
| <i>Anopheles gambiae</i>             | SDR10-1E1 | 36.65      | 36.06   |
| <i>Caenorhabditis elegans</i>        | SDR10-1E1 | 38.13      | 34.05   |
| <i>Apis mellifera</i>                | SDR10-1E1 | 38.58      | 39.17   |
| <i>Aplysia californica</i>           | SDR10-1E1 | 53.79      | 48.54   |

Table S41b. Percent identity values of the human SDR10E family variants and of their invertebrate orthologs.

| Species                              | Variants  | Phase formula | Splicing site phases |  |   |   |   |  |  |   |  |   |   |   |
|--------------------------------------|-----------|---------------|----------------------|--|---|---|---|--|--|---|--|---|---|---|
| <i>Homo sapiens</i>                  | SDR11E1   | 22            | 2                    |  | 2 |   |   |  |  |   |  |   |   |   |
|                                      | SDR11E2   |               | 2                    |  | 2 |   |   |  |  |   |  |   |   |   |
|                                      | SDR11E3   | 22102         | 2                    |  | 2 | 1 | 0 |  |  | 2 |  |   |   |   |
| <i>Strongylocentrotus purpuratus</i> | SDR11-1E1 | 22            | 2                    |  | 2 |   |   |  |  |   |  |   |   |   |
| <i>Musca domestica</i>               | SDR11-1E1 | 222           | 2                    |  | 2 |   |   |  |  | 2 |  |   |   |   |
| <i>Caenorhabditis briggsae</i>       | SDR11-1E1 | 221000        | 2                    |  | 2 |   | 1 |  |  | 0 |  | 0 | 0 | 0 |

Table S42a. Splicing site organization of the human SDR11E family variants and of their invertebrate orthologs. For further details see Table S39a.

| Species                              | Variants  | % identity |         |         |
|--------------------------------------|-----------|------------|---------|---------|
|                                      |           | SDR11E1    | SDR11E2 | SDR11E3 |
| <i>Homo sapiens</i>                  | SDR11E2   | 93.55      |         |         |
|                                      | SDR11E3   | 38.40      | 39.00   |         |
| <i>Strongylocentrotus purpuratus</i> | SDR11-1E1 | 32.03      | 32.87   | 33.98   |
| <i>Musca domestica</i>               | SDR11-1E1 | 26.98      | 26.85   | 26.04   |
| <i>Caenorhabditis briggsae</i>       | SDR11-1E1 | 18.21      | 19.10   | 19.52   |

Table S42b. Percent identity values of the human SDR11E family variants and of their invertebrate orthologs.

| Species                              | Variants   | Phase formula | Splicing-site phases |   |   |   |   |   |   |   |   |   |   |   |   |   |   |   |   |   |
|--------------------------------------|------------|---------------|----------------------|---|---|---|---|---|---|---|---|---|---|---|---|---|---|---|---|---|
|                                      |            |               |                      |   |   |   |   |   |   |   |   |   |   |   |   |   |   |   |   |   |
| <i>Homo sapiens</i>                  | SDR12C1    | 2022001000    |                      |   | 2 |   | 0 |   |   | 2 | 2 |   | 0 |   | 0 | 1 |   | 0 |   | 0 |
|                                      | SDR12C2    |               |                      |   | 2 |   | 0 |   |   | 2 | 2 |   | 0 |   | 0 | 1 |   | 0 |   | 0 |
|                                      | SDR12C3    | 100           |                      |   |   | 1 |   |   |   |   |   |   |   |   |   |   | 0 |   |   | 0 |
| <i>Ciona intestinalis</i>            | SDR12C-1C1 | 21100         |                      |   |   | 2 |   |   | 1 |   |   | 1 |   |   |   |   | 0 |   |   | 0 |
|                                      | SDR12C-2C1 | 202000        |                      |   | 2 |   | 0 |   |   | 2 | 2 |   |   |   | 0 |   |   | 0 |   | 0 |
| <i>Strongylocentrotus purpuratus</i> | SDR12C-1C1 | 222000        |                      |   | 2 |   |   |   |   | 2 | 2 |   |   |   | 0 |   | 0 |   |   | 0 |
|                                      | SDR12C-2C1 | 001000        |                      |   |   |   |   | 0 |   |   |   |   | 0 |   |   | 2 |   | 0 |   | 0 |
| <i>Drosophila arizonae</i>           | SDR12C-1C1 | 2220          |                      |   | 2 |   |   |   |   | 2 | 2 |   |   |   |   |   |   |   |   |   |
| <i>Drosophila ananassae</i>          | SDR12C-1C1 | 2020          |                      |   | 2 |   | 0 |   |   | 2 |   |   |   |   |   |   | 0 |   |   |   |
| <i>Anopheles gambiae</i>             | SDR12C-1C1 | 202           |                      |   | 2 |   | 0 |   |   | 2 |   |   |   |   |   |   |   |   |   |   |
|                                      | SDR12C-2C1 | 220           |                      |   | 2 |   |   |   |   | 2 | 2 |   |   |   |   |   | 0 |   | 0 |   |
|                                      | SDR12C-3C1 | 22            |                      |   | 2 |   |   |   |   | 2 | 2 |   |   |   |   |   |   |   |   |   |
| <i>Apis mellifera</i>                | SDR12C-1C1 | 1220          |                      | 1 | 2 |   |   |   |   | 2 |   |   |   |   |   |   |   |   | 0 |   |
| <i>Caenorhabditis elegans</i>        | SDR12C-1C1 | 2200          | 2                    |   | 2 |   |   |   |   |   |   |   |   | 0 |   |   | 0 |   |   |   |
| <i>Caenorhabditis remanei</i>        | SDR12C-1C1 | 200           |                      |   | 2 |   |   |   |   |   |   |   |   | 0 |   |   | 0 |   |   |   |
| <i>Aplysia californica</i>           | SDR12C-1C1 | 20200000      |                      |   | 2 |   | 0 |   |   | 2 |   |   | 0 |   | 0 |   | 0 |   | 0 | 0 |
|                                      | SDR12C-2C1 | 22200         |                      |   | 2 |   |   |   |   | 2 | 2 |   |   |   | 0 |   | 0 |   |   | 0 |

Table S43a. Splicing site organization of the human SDR12C family variants and of their invertebrate orthologs. For further details see Table S39a.

| Species                              | Variants   | % identity |         |         |
|--------------------------------------|------------|------------|---------|---------|
|                                      |            | SDR12C1    | SDR12C2 | SDR12C3 |
| <i>Homo sapiens</i>                  | SDR12C2    | 40.47      |         |         |
|                                      | SDR12C3    | 41.02      | 34.25   |         |
|                                      |            |            |         |         |
| <i>Ciona intestinalis</i>            | SDR12C-1C1 | 35.84      | 32.42   | 41.19   |
|                                      | SDR12C-2C1 | 37.67      | 33.33   | 34.14   |
| <i>Strongylocentrotus purpuratus</i> | SDR12C-1C1 | 41.89      | 35.71   | 49.54   |
|                                      | SDR12C-2C1 | 27.23      | 27.43   | 19.67   |
| <i>Drosophila arizonae</i>           | SDR12C-1C1 | 37.79      | 32.55   | 39.56   |
| <i>Drosophila ananassae</i>          | SDR12C-1C1 | 46.86      | 38.93   | 38.74   |
| <i>Anopheles gambiae</i>             | SDR12C-1C1 | 44.33      | 34.68   | 39.00   |
|                                      | SDR12C-2C1 | 37.25      | 29.67   | 39.03   |
|                                      | SDR12C-3C1 | 31.97      | 30.54   | 37.00   |
| <i>Apis mellifera</i>                | SDR12C-1C1 | 37.75      | 33.78   | 42.86   |
| <i>Caenorhabditis elegans</i>        | SDR12C-1C1 | 39.46      | 31.44   | 32.48   |
| <i>Caenorhabditis remanei</i>        | SDR12C-1C1 | 35.40      | 34.01   | 34.01   |
| <i>Aplysia californica</i>           | SDR12C-1C1 | 45.54      | 36.33   | 38.13   |
|                                      | SDR12C-2C1 | 33.00      | 27.27   | 41.51   |

Table S43b. Percent identity values of the human SDR12C family variants and of their invertebrate orthologs.

| Species                              | Variants  | Phase formula | Splicing-site phases |   |   |  |   |  |  |  |   |   |  |   |   |   |   |   |   |   |   |  |  |  |  |   |   |   |   |
|--------------------------------------|-----------|---------------|----------------------|---|---|--|---|--|--|--|---|---|--|---|---|---|---|---|---|---|---|--|--|--|--|---|---|---|---|
| <i>Homo sapiens</i>                  | SDR16C1   | 00011         |                      |   |   |  | 0 |  |  |  |   |   |  |   |   |   | 0 |   |   |   |   |  |  |  |  |   | 1 |   | 1 |
|                                      | SDR16C2   | 000111        |                      |   |   |  | 0 |  |  |  |   |   |  |   |   | 0 |   |   |   |   |   |  |  |  |  |   | 1 |   | 1 |
|                                      | SDR16C3   |               |                      |   |   |  | 0 |  |  |  |   |   |  |   |   | 0 |   |   |   |   |   |  |  |  |  |   | 1 |   | 1 |
|                                      | SDR16C4   | 20011         |                      |   |   |  |   |  |  |  |   | 2 |  |   |   |   |   |   |   |   |   |  |  |  |  |   | 0 |   | 1 |
|                                      | SDR16C5   | 00211         |                      |   |   |  |   |  |  |  |   |   |  |   |   | 0 |   |   |   |   |   |  |  |  |  |   | 2 |   | 1 |
| <i>Ciona intestinalis</i>            | SDR16-1C1 | 000111        |                      |   | 0 |  |   |  |  |  |   |   |  |   |   | 0 |   |   |   |   |   |  |  |  |  |   | 1 |   | 1 |
| <i>Strongylocentrotus purpuratus</i> | SDR16-1C1 | 2011          |                      |   |   |  |   |  |  |  | 2 |   |  |   |   |   |   |   |   |   |   |  |  |  |  |   | 1 |   | 1 |
|                                      | SDR16-1C2 | 101           |                      |   |   |  |   |  |  |  |   |   |  |   |   |   |   |   |   |   |   |  |  |  |  |   | 1 |   |   |
|                                      | SDR16-1C3 | 2011          |                      |   |   |  | 2 |  |  |  |   |   |  |   |   |   |   |   |   |   |   |  |  |  |  |   |   | 1 | 1 |
| <i>Drosophila melanogaster</i>       | SDR16-1C1 | 1200011       | 1                    |   |   |  |   |  |  |  |   |   |  |   |   | 0 |   |   |   |   |   |  |  |  |  |   | 0 |   | 1 |
| <i>Anopheles gambiae</i>             | SDR16-1C1 | 0200011       | 0                    |   |   |  |   |  |  |  |   |   |  |   |   | 0 |   |   |   |   |   |  |  |  |  |   | 0 |   | 1 |
| <i>Apis mellifera</i>                | SDR16-1C1 | 220011        |                      |   |   |  |   |  |  |  | 2 |   |  |   |   |   | 2 |   |   |   |   |  |  |  |  |   | 0 |   | 1 |
| <i>Caenorhabditis elegans</i>        | SDR16-1C1 | 020011        |                      |   |   |  |   |  |  |  |   |   |  | 0 |   |   |   | 2 | 0 | 0 |   |  |  |  |  |   |   | 1 | 1 |
|                                      | SDR16-1C2 | 202001        |                      | 2 |   |  |   |  |  |  |   |   |  | 0 |   |   |   |   | 2 | 0 | 0 |  |  |  |  |   |   |   | 1 |
|                                      | SDR16-1C3 | 201           |                      |   |   |  |   |  |  |  |   |   |  |   |   |   |   |   | 2 | 0 |   |  |  |  |  |   |   | 1 |   |
| <i>Aplysia californica</i>           | SDR16-1C1 | 00111         |                      |   |   |  |   |  |  |  |   |   |  |   |   | 0 |   |   |   |   |   |  |  |  |  | 1 |   | 1 | 1 |
|                                      | SDR16-1C2 | 10111         |                      |   |   |  |   |  |  |  |   |   |  |   | 1 |   |   |   |   |   |   |  |  |  |  |   | 1 |   | 1 |

Table S44a. Splicing site organization of the human SDR16C family variants and of their invertebrate orthologs. For further details see Table S39a.

| Species                              | Variants  | % Identity |         |         |         |         |
|--------------------------------------|-----------|------------|---------|---------|---------|---------|
|                                      |           | SDR16C1    | SDR16C2 | SDR16C3 | SDR16C4 | SDR16C5 |
| <i>Homo sapiens</i>                  |           |            |         |         |         |         |
|                                      | SDR16C2   | 33.67      |         |         |         |         |
|                                      | SDR16C3   | 32.31      | 63.67   |         |         |         |
|                                      | SDR16C4   | 36.45      | 40.67   | 39.67   |         |         |
|                                      | SDR16C5   | 34.67      | 41.95   | 40.27   | 45.25   |         |
| <i>Ciona intestinalis</i>            | SDR16-1C1 | 37.92      | 42.42   | 41.08   | 42.05   | 48.84   |
| <i>Strongylocentrotus purpuratus</i> | SDR16-1C1 | 37.67      | 40.13   | 38.13   | 42.95   | 40.98   |
|                                      | SDR16-1C2 | 33.22      | 37.46   | 37.79   | 38.16   | 43.97   |
|                                      | SDR16-1C3 | 38.67      | 38.80   | 38.46   | 42.54   | 41.18   |
| <i>Drosophila melanogaster</i>       | SDR16-1C1 | 32.20      | 38.72   | 36.36   | 35.41   | 38.54   |
| <i>Apis mellifera</i>                | SDR16-1C1 | 34.14      | 40.48   | 39.46   | 37.05   | 38.85   |
| <i>Anophele gambiae</i>              | SDR16-1C1 | 33.22      | 41.52   | 37.02   | 35.40   | 42.07   |
| <i>Caenorhabditis elegans</i>        | SDR16-1C1 | 30.20      | 35.71   | 35.71   | 36.54   | 38.46   |
|                                      | SDR16-1C2 | 37.16      | 40.68   | 40.34   | 43.67   | 47.68   |
|                                      | SDR16-1C3 | 35.35      | 39.32   | 35.93   | 40.33   | 48.18   |

Table S44b. Percent identity values of the human SDR16C family variants and of their invertebrate orthologs.

| Species                              | Variants   | Phase formula | Splicing-site phases |   |   |   |   |   |   |   |
|--------------------------------------|------------|---------------|----------------------|---|---|---|---|---|---|---|
|                                      |            |               |                      |   | 2 | 2 |   |   |   |   |
| <i>Homo sapiens</i>                  | SDR21C1    | 22            |                      |   | 2 | 2 |   |   |   |   |
|                                      | SDR21C2    |               |                      |   | 2 | 2 |   |   |   |   |
| <i>Ciona intestinalis</i>            | SDR21C-1C1 | -             | No splicing sites    |   |   |   |   |   |   |   |
| <i>Strongylocentrotus purpuratus</i> | SDR21C-1C1 | 00110         | 0                    |   | 0 |   | 1 | 1 | 0 |   |
| <i>Megachile rotundata</i>           | SDR21C-1C1 | 201           | 2                    |   | 0 |   |   | 1 |   |   |
| <i>Aplysia californica</i>           | SDR21C-1C2 | 0201102       | 0                    | 2 | 0 |   | 1 | 1 | 0 | 2 |

Table S45a. Splicing site organization of the human SDR21C family variants and of their invertebrate orthologs. For further details see Table S39a.

| Specie                               | Variants   | % identity |         |
|--------------------------------------|------------|------------|---------|
| <i>Homo sapiens</i>                  |            | SDR21C1    | SDR21C2 |
|                                      | SDR21C2    | 71.84      |         |
| <i>Ciona intestinalis</i>            | SDR21C-1C1 | 55.64      | 49.45   |
| <i>Strongylocentrotus purpuratus</i> | SDR21C-1C1 | 46.01      | 44.20   |
| <i>Megachile rotundata</i>           | SDR21C-1C1 | 48.16      | 45.96   |
| <i>Aplysia californica</i>           | SDR21C-1C2 | 50.91      | 48.73   |

Table S45b. Percent identity values of the human SDR21C family variants and of their invertebrate orthologs.

| Species                              | Variants  | Phase formula | Splicing-site phases |   |   |   |   |   |   |   |   |   |  |  |
|--------------------------------------|-----------|---------------|----------------------|---|---|---|---|---|---|---|---|---|--|--|
| <i>Homo sapiens</i>                  | SDR25C1   | 1001001       |                      | 1 | 0 |   | 0 | 1 |   | 0 | 0 | 1 |  |  |
|                                      | SDR25C2   |               |                      | 1 | 0 |   | 0 |   | 1 | 0 | 0 | 1 |  |  |
| <i>Strongylocentrotus purpuratus</i> | SDR25-1C1 | 00010         |                      |   | 0 | 0 | 0 |   | 1 |   | 0 |   |  |  |
| <i>Drosophila melanogaster</i>       | SDR25-1C1 | 10            |                      | 1 |   |   |   |   |   | 0 |   |   |  |  |
| <i>Apis mellifera</i>                | SDR25-1C1 | 1000          |                      | 1 | 0 |   |   |   |   | 0 | 0 |   |  |  |
| <i>Caenorhabditis elegans</i>        | SDR25-1C1 | 100           |                      | 1 | 0 |   |   |   |   |   | 0 |   |  |  |
| <i>Aplysia californica</i>           | SDR25-1C1 | 2000100       | 2                    |   | 0 | 0 | 0 |   | 1 | 0 | 0 | 1 |  |  |

Table S46a. Splicing site organization of the human SDR25C family variants and of their invertebrate orthologs. For further details see Table S39a.

| Species                              | Variants  | % Identity |         |
|--------------------------------------|-----------|------------|---------|
|                                      |           | SDR25C1    | SDR25C2 |
| <i>Homo sapiens</i>                  | SDR25C2   | 59.78      |         |
| <i>Strongylocentrotus purpuratus</i> | SDR25-1C1 | 47.97      | 56.12   |
| <i>Drosophila melanogaster</i>       | SDR25-1C1 | 46.59      | 49.46   |
| <i>Apis mellifera</i>                | SDR25-1C1 | 44.15      | 43.38   |
| <i>Caenorhabditis elegans</i>        | SDR25-1C1 | 40.55      | 46.09   |
| <i>Aplysia californica</i>           | SDR25-1C1 | 49.80      | 56.92   |

Table S46b. Percent identity values of the human SDR25C family variants and of their invertebrate orthologs.

| Species                              | Variants  | Phase formula | Splicing-site phases |   |   |   |   |   |   |   |   |   |   |   |
|--------------------------------------|-----------|---------------|----------------------|---|---|---|---|---|---|---|---|---|---|---|
| <i>Homo sapiens</i>                  | SDR26C1   | 20222         | 2                    |   | 0 | 2 |   |   | 2 |   |   | 2 |   |   |
|                                      | SDR26C2   | 202022        | 2                    |   | 0 | 2 |   | 0 | 2 |   |   | 2 |   |   |
| <i>Ciona intestinalis</i>            | SDR26-1C2 | 2021212       | 2                    |   | 0 | 2 |   | 1 | 2 |   |   |   | 1 | 2 |
|                                      | SDR26-1C4 | 20222         | 2                    |   | 0 | 2 |   |   | 2 |   | 2 |   |   |   |
| <i>Strongylocentrotus purpuratus</i> | SDR26-1C1 | 200001        | 2                    | 0 |   |   | 0 |   |   | 0 |   |   | 0 | 1 |

Table S47a. Splicing site organization of the human SDR26C family variants and of their invertebrate orthologs. For further details see Table S39a.

| Species                              | Variants  | % identity |         |
|--------------------------------------|-----------|------------|---------|
| <i>Homo sapiens</i>                  |           | SDR26C1    | SDR26C2 |
|                                      | SDR26C2   | 41.22      |         |
| <i>Ciona intestinalis</i>            | SDR26-1C2 | 32.37      | 34.41   |
|                                      | SDR26-1C4 | 28.62      | 28.26   |
| <i>Strongylocentrotus purpuratus</i> | SDR26-1C1 | 24.10      | 25.08   |

Table S47b. Percent identity values of the human SDR26C family variants and of their invertebrate orthologs.

| Species                              | Variants  | Phase formula | Splicing-site phases |   |   |   |   |   |   |   |   |   |   |   |
|--------------------------------------|-----------|---------------|----------------------|---|---|---|---|---|---|---|---|---|---|---|
| <i>Homo sapiens</i>                  | SDR28C1   | 22210         |                      | 2 |   |   | 2 |   | 2 |   | 1 |   |   | 0 |
|                                      | SDR28C2   |               |                      | 2 |   |   | 2 |   | 2 |   | 1 |   |   | 0 |
| <i>Ciona intestinalis</i>            | SDR28-1C2 | 2221001       | 2                    | 2 | 2 |   |   | 1 |   |   | 0 |   | 0 | 1 |
| <i>Strongylocentrotus purpuratus</i> | SDR28-1C1 | 221           |                      |   |   |   | 2 |   | 2 |   | 1 |   |   |   |
|                                      | SDR28-1C2 | 2210          |                      |   |   |   | 2 |   | 2 |   | 1 |   | 0 |   |
|                                      | SDR28-1C3 | 210           |                      |   |   |   |   |   | 2 |   | 1 |   | 0 |   |
| <i>Aplysia californica</i>           | SDR28-1C1 | 0200          |                      |   |   | 0 |   |   | 2 | 0 |   | 0 |   |   |

Table S48a. Splicing site organization of the human SDR28C family variants and of their invertebrate orthologs. For further details see Table S39a.

| Species                              | Variants  | % identity |         |
|--------------------------------------|-----------|------------|---------|
| <i>Homo sapiens</i>                  |           | SDR28C1    | SDR28C2 |
|                                      | SDR28C2   | 44.59      |         |
| <i>Ciona intestinalis</i>            | SDR28-1C2 | 25.91      | 23.71   |
| <i>Strongylocentrotus purpuratus</i> | SDR28-1C1 | 42.53      | 47.71   |
|                                      | SDR28-1C2 | 39.21      | 44.80   |
|                                      | SDR28-1C3 | 35.31      | 40.42   |
| <i>Aplysia californica</i>           | SDR28-1C1 | 27.76      | 26.95   |

Table S48b. Percent identity values of the human SDR28C family variants and of their invertebrate orthologs.



| Species                              | Variants  | Phase formula | Splicing-site phases |   |   |   |   |   |   |   |   |   |   |   |  |   |  |   |
|--------------------------------------|-----------|---------------|----------------------|---|---|---|---|---|---|---|---|---|---|---|--|---|--|---|
| <i>Homo sapiens</i>                  | SDR32C1   | 120222        | 1                    |   |   | 2 |   | 0 |   |   | 2 |   |   | 2 |  |   |  | 2 |
|                                      | SDR32C2   | 20222         |                      |   |   | 2 |   |   | 0 |   | 2 |   |   | 2 |  |   |  | 2 |
| <i>Ciona intestinalis</i>            | SDR32-1C2 | 200220        |                      | 2 |   |   | 0 |   | 0 |   | 2 |   |   |   |  | 2 |  | 0 |
| <i>Strongylocentrotus purpuratus</i> | SDR32-1C1 | 22222         |                      |   | 2 | 2 |   |   |   | 2 |   |   | 2 |   |  |   |  | 2 |
| <i>Drosophila busckii</i>            | SDR32-1C1 | 0022          |                      | 0 |   |   | 0 |   |   | 2 |   |   |   |   |  |   |  | 2 |
| <i>Anopheles gambiae</i>             | SDR32-1C1 | 002           |                      | 0 |   |   | 0 |   |   |   |   |   |   |   |  |   |  | 2 |
| <i>Apis dorsata</i>                  | SDR32-1C1 | 00212         |                      | 0 |   |   | 0 |   |   | 2 |   | 1 |   |   |  |   |  | 2 |
| <i>Helobdella robusta</i>            | SDR32-1C1 | 22122         |                      |   |   | 2 |   |   |   |   | 2 |   |   | 1 |  | 2 |  | 2 |
| <i>Aplysia californica</i>           | SDR32-1C1 | 20222         |                      |   |   | 2 | 0 |   |   |   | 2 |   |   | 2 |  |   |  | 2 |

Table S49a. Splicing site organization of the human SDR32C family variants and of their invertebrate orthologs. For further details see Table S39a.

| Species                              | Variants  | % Identity |         |
|--------------------------------------|-----------|------------|---------|
| <i>Homo sapiens</i>                  |           | SDR32C1    | SDR32C2 |
|                                      | SDR32C2   | 43.19      |         |
| <i>Ciona intestinalis</i>            | SDR32-1C2 | 26.36      | 24.58   |
| <i>Strongylocentrotus purpuratus</i> | SDR32-1C1 | 46.43      | 33.66   |
| <i>Drosophila busckii</i>            | SDR32-1C1 | 43.49      | 32.35   |
| <i>Anopheles gambiae</i>             | SDR32-1C1 | 47.08      | 30.69   |
| <i>Apis dorsata</i>                  | SDR32-1C1 | 44.81      | 30.26   |
| <i>Helobdella robusta</i>            | SDR32-1C1 | 43.34      | 31.67   |
| <i>Aplysia californica</i>           | SDR32-1C1 | 45.90      | 37.09   |

Table S49b. Percent identity values of the human SDR32C family variants and of their invertebrate orthologs.

| Species                              | Variants  | Phase formula | Splicing-site phases |   |   |   |   |   |   |   |   |   |   |   |   |   |   |   |
|--------------------------------------|-----------|---------------|----------------------|---|---|---|---|---|---|---|---|---|---|---|---|---|---|---|
| <i>Homo sapiens</i>                  | SDR42E1   | 1             |                      |   | 1 |   |   |   |   |   |   |   |   |   |   |   |   |   |
|                                      | SDR42E2   | 0020200020    |                      |   |   | 0 | 0 | 2 | 0 | 2 | 0 | 0 |   | 0 | 2 | 0 |   |   |
| <i>Ciona intestinalis</i>            | SDR42-1E1 | 100202000202  |                      | 1 |   | 0 | 0 | 2 | 0 | 2 | 0 | 0 |   | 0 | 2 | 0 |   | 2 |
| <i>Strongylocentrotus purpuratus</i> | SDR42-1E1 | 02020020      |                      |   |   |   | 0 | 2 | 0 | 2 | 0 | 0 |   |   | 2 | 0 |   |   |
| <i>Caenorhabditis elegans</i>        | SDR42-1E1 | 20000         | 2                    |   |   | 0 | 0 |   | 0 |   | 0 |   |   |   |   |   |   | 0 |
|                                      | SDR42-2E1 | 000000        |                      |   |   | 0 | 0 |   | 0 |   | 0 |   | 0 |   |   |   |   | 0 |
| <i>Caenorhabditis remanei</i>        | SDR42-1E2 | 00000         |                      |   |   |   | 0 |   | 0 |   | 0 |   | 0 |   |   |   |   | 0 |
| <i>Aplysia californica</i>           | SDR42-1E1 | 2000020       |                      |   |   |   |   | 2 | 0 |   |   | 0 | 0 |   | 0 | 2 | 0 |   |

Table S50a. Splicing site organization of the human SDR42E family variants and of their invertebrate orthologs. For further details see Table S39a.

| Species                              | Variants  | % identity |         |
|--------------------------------------|-----------|------------|---------|
|                                      |           | SDR42E1    | SDR42E2 |
| <i>Homo sapiens</i>                  |           | 47.18      |         |
| <i>Ciona intestinalis</i>            | SDR42-1E1 | 41.58      | 40.69   |
| <i>Strongylocentrotus purpuratus</i> | SDR42-1E1 | 49.55      | 43.88   |
| <i>Caenorhabditis elegans</i>        | SDR42-1E1 | 27.01      | 27.54   |
|                                      | SDR42-2E1 | 24.72      | 29.46   |
| <i>Caenorhabditis remanei</i>        | SDR42-1E2 | 28.33      | 31.58   |
| <i>Aplysia californica</i>           | SDR42-1E1 | 48.97      | 39.69   |

Table S50b. Percent identity values of the human SDR42E family variants and of their invertebrate orthologs. Note, this figure is identical to Table S4b in the main text.
