# Supplementary material for: Gene Structure Evolution of the Short-Chain Dehydrogenase/Reductase (SDR) Family
Source: MDPI journal article supplement (doi:10.3390/genes14010110), 2022-12-30
Supplement: s1 [file s1]

## PRIMATE SDR42E VARIANTS

|         |                |                        | x  | x                                 | x   |      |  |
|---------|----------------|------------------------|----|-----------------------------------|-----|------|--|
| SDR42E1 | H. sapiens     | MDPKRSQKESVLITGGSGYFGF | r1 | GCALNQNGVHVILFDISSPAQTIPEGIKFIQGD | IRH | 1p.1 |  |
| SDR42E1 | P. troglodytes | MDPKRSQKETVLITGGSGYFGF | r1 | GCALNQKGVHVILFDISSPAQTIPEGIKFIQGD | IRH | 1p.1 |  |
| SDR42E1 | P. paniscus    | MDPKRSQKETVLITGGSGYFGF | r1 | GCALNQKGVHVILFDISSPAQTIPEGIKFIQGD | IRH | 1p.1 |  |
| SDR42E1 | N. leucogenys  | MDPQRPQKETVLITGGSGYFGF | r1 | GCALNQKGVHVILFDISSPAQTIPEGIKFIRGD | IRH | 1p.1 |  |
| SDR42E1 | M. mulatta     | MDPKRSQKETVLITGGGGYFGF | r1 | GCALNQKGVHVILFDISSPAETIPEGIKFIQGD | ICH | 1p.1 |  |
| SDR42E1 | P. anubis      | MDPKRSQQETVLITGGGGYFGF | r1 | GCALNQKGVHVILFDISSPAETIPEGIKFIQGD | IRH | 1p.1 |  |
| SDR42E1 | C. jacchus     | MDPKRSPKETVLITGGGGYFGF | r1 | GCALNQKGVHVILFDINSPAQTVPEGIKFIQGD | IRH | 1p.1 |  |
| SDR42E1 | M. murinus     | MDAEKSPAETVLITGGGGYFGF | -1 | GCALNQQGVHVILFDINSPAETIPEGIKFARGD | IRH | 1p.1 |  |
|         |                | **                     |    | * * * * *                         |     |      |  |

|         |                |                          |       |                  |                 |
|---------|----------------|--------------------------|-------|------------------|-----------------|
| SDR42E1 | H. sapiens     | LSDVEKAFQDADVTCVFHIASYGM | SGREQ | LNRNLIKEVNVRGTDN | ILQVCQRRRVPRLVY |
| SDR42E1 | P. troglodytes | LSDVEKAFQDADVTCVFHIASYGM | SGREQ | LNRNLIKEVNVRGTDN | ILQVCQRRSVPRVY  |
| SDR42E1 | P. paniscus    | LSDVEKAFQDADVTCVFHIASYGM | SGREQ | LNRNLIKEVNVRGTDN | ILQVCQRRSVPLVY  |
| SDR42E1 | N. leucogenys  | LSDVDKAFQDADVTCVFHIASYGM | SGREQ | LNRNLIKEVNIRGTDN | ILQACQRRRVPRLVY |
| SDR42E1 | M. mulatta     | LSDIEKAFQDADITCVFHIASYGM | SGREQ | LNRNLIKEVNIGGTDN | ILQACQRRRVPRLVY |
| SDR42E1 | P. anubis      | LSDIEKAFQDADITCVFHIASYGM | SGREQ | LNRNLIKEVNIGGTDN | ILQACQRRRVPRLVY |
| SDR42E1 | C. jacchus     | VSDVEKAFQDADVTCVFHIASYGM | SGWEQ | LSRNPIEEVNIGGTDN | ILQACQRRMVPRVY  |
| SDR42E1 | M. murinus     | LSDVENAFQDANVTCVFHIASYGM | SGREQ | LNGNLIKEVNVGGTDN | VLQACRRRGVPRVY  |
|         |                | **                       |       | * * * * *        |                 |

|         |                |                                                              | + | + |  |
|---------|----------------|--------------------------------------------------------------|---|---|--|
| SDR42E1 | H. sapiens     | TSTFNVIFGGQVIRNGDESLPYLPLHLHPDHYSRTKSIAEQKVLEANATPLDRGDGVLRT |   |   |  |
| SDR42E1 | P. troglodytes | TSTFNVIFGGQVIRNGDESLPYLPLHLHPDHYSRTKSIAEQKVLEANATPLDRGDGVLRT |   |   |  |
| SDR42E1 | P. paniscus    | TSTFNVIFGGQVIRNGDESLPYLPLHLHPDHYSRTKSIAEQKVLEANATPLDRGDGVLRT |   |   |  |
| SDR42E1 | N. leucogenys  | TSTFNVIFGGQVIRNGDESLPYLPLHLHPDHYSRTKSIAEQKVLEANGTPLDRGDGVLRT |   |   |  |
| SDR42E1 | M. mulatta     | TSTFNVIFGGQVIRNGDESLPYLPLHLHPDHYSRTKSIAEKKVLEANGTPLDRGDGVLRT |   |   |  |
| SDR42E1 | P. anubis      | TSTFNVIFGGQVIRNGDESLPYLPLHLHPDHYSRTKSIAEKKVLEANGTPLDRGNGVLRT |   |   |  |
| SDR42E1 | C. jacchus     | TSTFNVIFGGQVIRNGDESLPYLPLHLHPDHYSRTKSIAEKKVLEANGTPLNGGGDVLRT |   |   |  |
| SDR42E1 | M. murinus     | TSTFNVIFGGQVIRNGDESLPYLPLHLHPDHYSRTKSIAERKVLEANGTLLTG        |   |   |  |
|         |                | *****                                                        |   |   |  |

|         |                |                                                     |    |         |
|---------|----------------|-----------------------------------------------------|----|---------|
| SDR42E1 | H. sapiens     | CALRPAGIYGPGEQRHLPRIVSYIEKGLFKFVYGDPRSLVEFVHVDNLVQA | HI | LASEALR |
| SDR42E1 | P. troglodytes | CALRPAGIYGPGEQRHLPRIVSYIEKGLFKFVYGDPRSLVEFVHVDNLVQA | HI | LASEALR |
| SDR42E1 | P. paniscus    | CALRPAGIYGPGEQRHLPRIVSYIEKGLFKFVYGDPRSLVEFVHVDNLVQA | HI | LASEALR |
| SDR42E1 | N. leucogenys  | CALRPAGIYGPGEQRHLPRIVSYIEKGLFKFVYGDPRSLVEFVHVDNLVQA | HI | LASEALR |
| SDR42E1 | M. mulatta     | CALRPAGIYGPGEQRHLPRIVSYIEKGLFKFVYGDPRSLVEFVHVDNLVQA | HI | LASEALR |
| SDR42E1 | P. anubis      | CALRPAGIYGPGEQRHLPRIVSYIEKGLFKFVYGDPRSLVEFVHVDNLVQA | HI | LASEALR |
| SDR42E1 | C. jacchus     | CALRPAGIYGPGEQRHLPRIVSYIEKGLFKFVYGDPSLVEFVHVDNLVQA  | HI | LALALR  |
| SDR42E1 | M. murinus     | CALRPAGIYGPGERRHLPRIVSYIERGLFKFVYGDPSLVEFVHVDNLVQA  | HI | LASEALK |
|         |                | *****                                               |    |         |

|         |                |                                                      |         |
|---------|----------------|------------------------------------------------------|---------|
| SDR42E1 | H. sapiens     | ADKGHIASGQPYFISDGRPVNNFEFFRPLVEGLGYTFPSTRPLTLVYCFAFL | TEMVHFI |
| SDR42E1 | P. troglodytes | ADKGHIASGQPYFISDGRPVNNFEFFRPLVEGLGYTFPSTRPLTLVYCFAFL | TEMVHFI |
| SDR42E1 | P. paniscus    | ADKGHIASGQPYFISDGRPVNNFEFFRPLVEGLGYTFPSTRPLTLVYCFAFL | TEMVHFI |
| SDR42E1 | N. leucogenys  | ADKGHIASGQPYFISDGRPVNNFEFFRPLVEGLGYTFPSTRPLTLVYCFAFL | TEMVHFI |
| SDR42E1 | M. mulatta     | ADKGHIASGQPYFISDGRPVNNFEFFRPLVEGLGYTFPSTRPLTLVYCFAFL | TEMVHFI |
| SDR42E1 | P. anubis      | ADKGHIASGQPYFISDGRPVNNFEFFRPLVEGLGYTFPSTRPLTLVYCFAFL | TEMVHFI |
| SDR42E1 | C. jacchus     | ADKGHIASGQSYFISDGRPVNNFEFFRPLVEGLGYTFPSTRPLTLVYCFAFL | TEMVHFI |

|                        |                                                                       |
|------------------------|-----------------------------------------------------------------------|
| SDR42E1 M. murinus     | ADKGYIASGQPYFISDGRPVNNFEFFRPLVEGLGYTFPSTRLPLYLIYCFAFLTEMAHFL<br>***** |
| SDR42E1 H. sapiens     | LGRLYNFQPFLLTRTEVYKTGVTHYFSLEKAKKELGYKAQPFDLQEAVEWFKAHGHGRSSG         |
| SDR42E1 P. troglodytes | LGRLYNFQPFLLTRTEVYKTGVTHYFSLEKAKKELGYKAQPFDLQEAVEWFKAHGHGRSSG         |
| SDR42E1 P. paniscus    | LGRLYNFQPFLLTRTEVYKTGVTHYFSLEKAKKELGYKAQPFDLQEAVEWFKAHGHGRSSG         |
| SDR42E1 N. leucogenys  | LGRLYNFQPFLLTRTEVYKTGVTHYFSLEKAKKELGYKAQPFDLQEAVEWFKAHGHGRSSG         |
| SDR42E1 M. mulatta     | LGRLYNFQPFLLTRTEVYKTGVTHYFSLEKAKKELGYKAQPFDLQEAVEWFKAHGHGRSSG         |
| SDR42E1 P. anubis      | LGRLYNFQPFLLTRTEVYKTGVTHYFSLEKAKKELGYKAQPFDLQEAVEWFKAHGHGRSSG         |
| SDR42E1 C. jacchus     | LGRLYNFQPFLLTRTEVYKTGVTHYFSLEKAKKELGYKAQPFDLQEVEWFKAHGHGRSSG          |
| SDR42E1 M. murinus     | LGRLYNFQPFLLTRTEVYKTGVTHYFSLEKAKKELGYEAQPFDLQEVEWFKAHGHGRSPG<br>***** |
| SDR42E1 H. sapiens     | SRDSECFVWDGLLVFLIIIAVLMWLPSSVILSL                                     |
| SDR42E1 P. troglodytes | SRDSECFVWDGLLVFLIIIAVLMWLPSSVILSL                                     |
| SDR42E1 P. paniscus    | SRDSECFVWDGLLVFLIIIAVLMWLPSSVILSL                                     |
| SDR42E1 N. leucogenys  | SSDLECFVWDGLLVFLIIIAVLMWLPSSVILSL                                     |
| SDR42E1 M. mulatta     | SRDSECFIWDGLLVFLIIIAVLIWLPSSVILSL                                     |
| SDR42E1 P. anubis      | SRDSECFIWDGLLVFLIIIAVLIWLPSSVILSL                                     |
| SDR42E1 C. jacchus     | SRDSDCFVWDGLLVFLIIATLTWLLSVILL-                                       |
| SDR42E1 M. murinus     | SHGSEYHVWRGLLVFFLVIAVLTWLLPSVILL<br>* * * * *                         |

Figure S49. Alignment of the primate SDR42E protein variants. For further details see Online Resources 2 Fig. S3.

\* symbol marks the position of identical amino acid residues of the aligned SDR protein sequences.

|         |                |                                                               |      |
|---------|----------------|---------------------------------------------------------------|------|
| SDR42E2 | H. sapiens     | MKSNPPRSSLEACKAAGQGEKSCPVCQACGEVSGPRSGSGSES                   |      |
| SDR42E2 | P. troglodytes | MKSNPPRSSLEACKAAGQGEKSCPVCQACGEVSGPRSGSGSES                   |      |
| SDR42E2 | P. paniscus    | -----                                                         |      |
| SDR42E2 | N. leucogenys  | -----                                                         |      |
| SDR42E2 | M. mulatta     | MKSNPPGSSPEACKAAGQGEKSCPVCQACGEVSGPRSGLGSESGPAPKPGAIPGPGLGPK  |      |
| SDR42E2 | P. anubis      | MKSNPPGSSPEACKFAAQGEKSCPVCQACGEVSGPRSGLGSESGPAPKPGAIPGPGLGPK  |      |
| SDR42E2 | C. jacchus     | MKPNPPGSSPEACKAAGQGEKSCPVCQACGEVSGPRSGLGSESGFPVKPGAIPGPGLGPK  |      |
| SDR42E2 | M. murinus     | MKPNPTG-----KAADQGEKSCPVCQACGGVSGPKSGLGPGPGP----NSIPGQGAGPG   |      |
|         |                |                                                               |      |
| SDR42E2 | H. sapiens     | AIPGPQAGSGTVPRPGAISGTGPGLGPGPGAGSVPGPGAGSV                    |      |
| SDR42E2 | P. troglodytes | AIPGPQAGSDTVPRPGAISGTGPSLGPGPGAGSVPGPGTGSVP-----GPGAGSVPG     |      |
| SDR42E2 | P. paniscus    | -----                                                         |      |
| SDR42E2 | N. leucogenys  | -----                                                         |      |
| SDR42E2 | M. mulatta     | AIPGPQAGSGVAPRPGAISGTGPGLGPGPGARSVPGPGAESIPGLGAGSVPGPGTGSIPG  |      |
| SDR42E2 | P. anubis      | AIPGPQAGSGVALRPGAISGTGLGLGPGPGAGSVPGPGVGSIPGLGAGSVPGPGTGSIPG  |      |
| SDR42E2 | C. jacchus     | AIPEPQVGSGAGLRPDTVSGTGPGLGPGPGSGSVPGPGARSVPAPGARLAPAPGARSAPG  |      |
| SDR42E2 | M. murinus     | SVPGPGAVPGRGA-----GSGAVPGRGAG-----                            |      |
|         |                |                                                               |      |
| SDR42E2 | H. sapiens     | PGAGSVPGPGAGSVPGPGAGSGPGLGGGLGPGVGAGPGAGSVPGPGAGSVPGPGAGSVPG  |      |
| SDR42E2 | P. troglodytes | LGAGSVPGPGAGSVPGPGAGSGPGLGAGLGPGGLGAGPGAGSVPGPGAGSVPG-----    |      |
| SDR42E2 | P. paniscus    | -----                                                         |      |
| SDR42E2 | N. leucogenys  | -----                                                         |      |
| SDR42E2 | M. mulatta     | LGVGSIIPGPGAGSILGPGAGSGPGLGAGSAPGPGSGSVPGLGAGLGHGLGAGPEAGSVPG |      |
| SDR42E2 | P. anubis      | LGVGSIIPGPGAGSVLGPGAGSGPGLGAGSVPGPGAGSVSGLGAGLGHGLGAGPEAGSVPG |      |
| SDR42E2 | C. jacchus     | LGAEVPEPGAGLVPGPGSGSAPGLGAGSVPVIGAGSVPG-----PGAGSVPG          |      |
| SDR42E2 | M. murinus     | --PGAVPGRGAG-----PGAVPGRGAGPGAVPGPESGPGAVLG                   |      |
|         |                |                                                               |      |
| SDR42E2 | H. sapiens     | PGAGSVPGAGAGSTPEPELGPGLRQGS                                   |      |
| SDR42E2 | P. troglodytes | -----PGAGSTPEPELGPGLRQGS                                      |      |
| SDR42E2 | P. paniscus    | -----MKSNNPPRSSLEACKAAGqaPQQKTQAKPTKAARQKV                    | 1p.2 |
| SDR42E2 | N. leucogenys  | -----MKSNNPPGS-SPDACKAVGqaPQQKTQAKPTKAARQKV                   | 1p.2 |
| SDR42E2 | M. mulatta     | PGAGSVPGPGAGSTPEPELGPGRQGS                                    |      |
| SDR42E2 | P. anubis      | PGAGSVPGPGAGSTPEPELGPGLRQGS                                   |      |
| SDR42E2 | C. jacchus     | LGSGSAPGPGAGSTPEPELGSGLTQGS                                   |      |
| SDR42E2 | M. murinus     | PGPGLGPGPGAGSLRPEVGPGRKGS                                     |      |
|         |                | ***** * ****                                                  |      |
|         |                |                                                               |      |
| SDR42E2 | H. sapiens     | LVTGGGGYLGFSILGSHLAKSGTSVILLDRRRPQWELSPETKFIqaDVRDEEALYRAFEGV | 1p.0 |
| SDR42E2 | P. troglodytes | LVTGGGGYLGFSILGSHLAKSGTSVILLDCRRPQWELSPETKFIqaDVRDEEALYRAFEGV | 1p.0 |
| SDR42E2 | P. paniscus    | LVTGGGGYLGFSILGSHLAKSGTSVILLDRRRPQWELSPETKFIqaDVRDEEALYRAFEGV | 2p.0 |
| SDR42E2 | N. leucogenys  | LVTGGGGYLGFSILGSHLAKTGTSVILLDRRRPQWELSPETKFIqaDVRDEEALYRAFEGV | 2p.0 |
| SDR42E2 | M. mulatta     | LVTGGGGYLGFSILGSHLAKSGTPVILLDRRRPQWELSPETEFIqaDVRDEEALYRAFKGV | 1p.0 |
| SDR42E2 | P. anubis      | LVTGGGGYLGFSILGSHLAKSGTPVILLDRRRPQWELCPETEFIqaDVRDEEALYRAFKGV | 1p.0 |
| SDR42E2 | C. jacchus     | LVTGGGGYLGFSILGSHLAKSGTSVILLDRRRPQWELSPETEFIqaDVRDEEALYRAFEGV | 1p.0 |
| SDR42E2 | M. murinus     | LVTGGGGYLGFTLGSSLARSGTSVILLDLHRPQWTLPSGTEFIqaDVRDEETLYRAFEGV  | 1p.0 |
|         |                | ***** ** ** ***** * * ***** ***** **                          |      |

|         |                |                                     |                                                            |       |       |
|---------|----------------|-------------------------------------|------------------------------------------------------------|-------|-------|
| SDR42E2 | H. sapiens     | DCVFHVASYGMSGAEklQK-EQIESINVGGTKLVI | dvCVRRRVPRLIYTSTVNVAFGGKP                                  | 2p.0  | 3p.2  |
| SDR42E2 | P. troglodytes | DCVFHVASYGISGAEklQK-EQIESINVGGTKLVI | dvCVRRRVPRLIYTSTVNVAFGGKP                                  | 2p.0  | 3p.2  |
| SDR42E2 | P. paniscus    | DCVFHVASYGMSGAEklQK-EQIESINVGGTKLVI | dvCVRRRVPRLIYTSTVNVAFGGKP                                  | 3p.0  | 4p.2  |
| SDR42E2 | N. leucogenys  | DCVFHVASYGMSGAEklQK-EQIESINVGGTKLVI | dvCVRRRVPRLIYTSTVNVAFGGKP                                  | 3p.0  | 4p.2  |
| SDR42E2 | M. mulatta     | DCVFHMASYGMSGAEklQK-EQIESINVGGTKLVI | dvCVRQRPRLIYTSTVNVAFGGKP                                   | 2p.0  | 3p.2  |
| SDR42E2 | P. anubis      | DCVFHMASYGLSGAEklQEMRMESINVGGTKLVI  | dvCVRQRPRLIYTSTVNVAFGGKP                                   | 2p.0  | 3p.2  |
| SDR42E2 | C. jacchus     | DCVFHVASYGMSGAEklQK-EQIESINVGGTKLVI | dvCVRRRVPRLIYTSTVNVAFGGKP                                  | 2p.0  | 3p.2  |
| SDR42E2 | M. murinus     | DCVFHMASYGMSGEEklQK-EQIESINVGGTKLVI | dvCVRRRVPRLIYTSTVNVAFGGKP                                  | 2p.0  | 3p.2  |
|         |                | *****                               | *****                                                      |       |       |
| SDR42E2 | H. sapiens     | IEQGDEDSVPYFPLD                     | ehVDHYSRTKAIADQLTLMANGMPLpgGGTLRTCVRPPGIYGPE               | 4p.0  | 5p.2  |
| SDR42E2 | P. troglodytes | IEQGDEDSVPYFPLD                     | ehVDHYSRTKAIADQLTLMANGTPLpgGGTLRTCVRPPGIYGPE               | 4p.0  | 5p.2  |
| SDR42E2 | P. paniscus    | IEQGDEDSVPYFPLD                     | ehVDHYSRTKAIADQLTLMANGTPLpgGGTLRTCVRPPGIYGPE               | 5p.0  | 6p.2  |
| SDR42E2 | N. leucogenys  | IEQGDEDSVPYFPLD                     | ehIDHYSRTKAIADQLTLMANGTPLpgGGTLRTCVRPPGIYGPE               | 5p.0  | 6p.2  |
| SDR42E2 | M. mulatta     | IEQGDEDSVPYFPLD                     | ehIDHYSRTKAIADQLTLMANGTPLpgGGALRTCVRPPGIYGPE               | 4p.0  | 5p.2  |
| SDR42E2 | P. anubis      | IEQGDEDSVPYFPLD                     | khIDHYSRTKAIADQLTLMANGTPLpgGGALRTCVRPPGIYGPE               | 4p.0  | 5p.2  |
| SDR42E2 | C. jacchus     | IQQGDEDSVPYFPLD                     | ehIDHYSRTKAIADQLTLMANGTPLpgGGILRTCVRPPGIYGPE               | 4p.0  | 5p.2  |
| SDR42E2 | M. murinus     | IEQGDEDSVPYFPLD                     | khVDHYSRTKAIADQLTLMANGTPLpgGGTLRTCVRPPGIYGPE               | 4p.0  | 5p.2  |
|         |                | * *****                             | *****                                                      |       |       |
| SDR42E2 | H. sapiens     | EQRHLPRV                            | agHIKKRLFMFRFGDHKARMNWVHVHNLVQAHVLAEEALTTAKGYVasGQAY       | 6p.0  | 7p.0  |
| SDR42E2 | P. troglodytes | EQRHLPRV                            | agHIKKRLFMFRFGDRKARMNWVHVHNLVQAHVLAEEALTTAKGYVasGQAY       | 6p.0  | 7p.0  |
| SDR42E2 | P. paniscus    | EQRHLPRV                            | agHIKKRLFMFRFGDRKARMNWVHVHNLVQAHVLAEEALTTAKGYVasGQAY       | 7p.0  | 8p.0  |
| SDR42E2 | N. leucogenys  | EQRHLPRV                            | agHIKKRLFMFRFGDRKARMNWVHVHNLVQAHMLASEALTTAKGYVasGQAY       | 7p.0  | 8p.0  |
| SDR42E2 | M. mulatta     | EQRHLPRV                            | agHIKKRLFMFRFGDRKARMNWVHVHNLVQAHVLAEEALTTAKGYVasGQAY       | 6p.0  | 7p.0  |
| SDR42E2 | P. anubis      | EQRHLPRV                            | agHIKKRLFMFRFGDRKARMNWVHVHNLVQAHVLAEEALTTAKGYVangQAY       | 6p.0  | 7p.0  |
| SDR42E2 | C. jacchus     | EQRHLPRV                            | agHIKKRLFSFRFGDRKAQMNWVHVHNVQAHVLAALKALTVGKGYVasGQAY       | 6p.0  | 7p.0  |
| SDR42E2 | M. murinus     | EQRHLPRV                            | vsHLKKMLFMVRFGRDRTRMNWVHVHNLVQAHMLAAEALTTAKGYVasGQAY       | 6p.0  | 7p.0  |
|         |                | *****                               | *****                                                      |       |       |
| SDR42E2 | H. sapiens     | YINDGESVNLFEWMAPl                   | feKLGYSQPWIQVPTSWVYLtaAVMERLHLALRPICSLPPLLT                | 8p.0  | 9p.2  |
| SDR42E2 | P. troglodytes | YINDGESVNLFEWMAPl                   | feKLGYSQPWIQVPTSWVYLtaAVMERLHLALRPICSLPPLLT                | 8p.0  | 9p.2  |
| SDR42E2 | P. paniscus    | YINDGESVNLFEWMAPl                   | feKLGYSQPWIQVPTSWVYLtaAVMERLHLALRPICSLPPLLT                | 9p.0  | 10p.2 |
| SDR42E2 | N. leucogenys  | YINDGESVNLFEWMAPl                   | feKLGYSQPWIQVPTSWVYLtaAVMERLHLALRPICSLPPLLT                | 9p.0  | 10p.2 |
| SDR42E2 | M. mulatta     | YINDGESVNLFEWMAPl                   | feKLGYSQPWIQVPTSWVYLtaAVMEHLHLALRPICCLPPLLT                | 8p.0  | 9p.2  |
| SDR42E2 | P. anubis      | YINDGESVNLFEWMAPl                   | feKLGYSQPWIQVPTSWVYLtaAVMERLHLALRPICCLPPLLT                | 8p.0  | 9p.2  |
| SDR42E2 | C. jacchus     | YINDGESVNLFEWMAPl                   | feKLGYSQPRIQVPTSWVYLtaAVMEHLHLALRPICNLPLLLT                | 8p.0  | 9p.2  |
| SDR42E2 | M. murinus     | YINDGDSINLFEWIAPl                   | feKLGYSQPWIQVPTSWIYLtaSVMEHVHLALRPICSVPLLLT                | 8p.0  | 9p.2  |
|         |                | *****                               | *****                                                      |       |       |
| SDR42E2 | H. sapiens     | RS                                  | evRSVAVTHTFQIAKARAQLGYAPDKFRFADAVELYVQSTTRRPRGSTARTLLRLLLR | 10p.0 |       |
| SDR42E2 | P. troglodytes | RS                                  | evRSVAVTHTFQIAKARAQLGYAPDKFRFADAVELYVQSTTRRPRGSTARTLLRLLLG | 10p.0 |       |
| SDR42E2 | P. paniscus    | RS                                  | evRSVAVTHTFQIAKARAQLGYAPDKFRFADAVELYVQSTTRRPRGSTARTLLRLLLG | 11p.0 |       |
| SDR42E2 | N. leucogenys  | RS                                  | evRSVAVTHTFQIAKARAQLGYAPDKFRFADAVELYVQSTTWRPRGSTARTLLRLLLG | 11p.0 |       |
| SDR42E2 | M. mulatta     | RS                                  | evRSVAVTHTFQIAKARAQLGYAPDKFKFADAVELYVQSTTRRPRGSTARTLLRLLLG | 10p.0 |       |
| SDR42E2 | P. anubis      | RS                                  | evRSVAVTHTFQIAKARAQLGYAPDKFRFADAVELYVQSTTRRPRGSTARTLLRLLLG | 10p.0 |       |
| SDR42E2 | C. jacchus     | RS                                  | evCSVAVTHTFQIAKARAQLGYAPDKFSLADVVERYVQSTSFRPRSSTAQTLLRLLLG | 10p.0 |       |
| SDR42E2 | M. murinus     | RS                                  | evCSVAVTHTFQIAKARAQLGYAPDKFSFSDAVERYMQSSAPRQRGSTTRALLRLLLG | 10p.0 |       |
|         |                | *****                               | *****                                                      |       |       |
| SDR42E2 | H. sapiens     | LLLFLGLLALALHFLGLQPLHAAVERL         |                                                            |       |       |

```

SDR42E2 P. troglodytes  LLLFLGLLALALHFLGLQPLHAAVERL
SDR42E2 P. paniscus    LLLFLGLLALALHFLGLQPLHAAVERL
SDR42E2 N. leucogenys  LLLFLGLLALALHFLGLQPLHAAVERL
SDR42E2 M. mulatta     LLLFLGLLALALHFLGLQPLHSSVERL
SDR42E2 P. anubis      LLLFLGLLALALHFLGLQPLQASVERL
SDR42E2 C. jacchus     LLLLGLLALALHFLGLQPLQAAMKRL
SDR42E2 M. murinus     LL-LLGLLALALHYLCQPLRAATERL
                        **  *****  *  ****  **

```

Figure S50. Alignment of the primate SDR42E2 proteins variants. For further details see Online Resources 2 Fig. S3.

\* symbol marks the position of identical amino acid residues of the aligned SDR protein sequences.

| Species                    | Gene symbol | Gene ID   | Chr | Enzyme symbol | Exons n. | Phases formula | % identity | aa n. | Structure consensus | Catalysis Consensus |
|----------------------------|-------------|-----------|-----|---------------|----------|----------------|------------|-------|---------------------|---------------------|
| <i>Homo sapiens</i>        | SDR42E1     | 93517     | 16  | SDR42E1       | 2        | 1              | 100.00     | 393   | GGSGYFG             | YSRTK               |
| <i>Pan troglodytes</i>     |             | 468047    | 16  |               |          |                | 98.98      |       |                     |                     |
| <i>Pan paniscus</i>        |             | 100984124 | 16  |               |          |                | 98.73      |       |                     |                     |
| <i>Nomascus leucogenys</i> |             | 100588195 | 2   |               |          |                | 96.69      |       |                     |                     |
| <i>Macaca mulatta</i>      |             | 714229    | 20  |               |          |                | 96.18      |       |                     |                     |
| <i>Papio anubis</i>        |             | 101004680 | 20  |               |          |                | 95.93      |       |                     |                     |
| <i>Callithrix jacchus</i>  |             | 100393984 | 20  |               |          |                | 91.58      | 392   | GGGGYFG             |                     |
| <i>Microcebus murinus</i>  |             | 105859480 | 20  |               |          |                | 87.50      | 393   |                     |                     |
| <i>Homo sapiens</i>        | SDR42E2     | 100288072 | 16  | SDR42E2       | 11       | 0020200020     | 100.00     | 626   | GGGGYLK             | YSRTK               |
| <i>Pan troglodytes</i>     |             | 100615511 | 16  |               |          | 97.84          | 602        |       |                     |                     |
| <i>Pan paniscus</i>        |             | 100971052 | 16  |               | 12       | 20020200020    | 95.50      | 422   |                     |                     |
| <i>Nomascus leucogenys</i> |             | 100592297 | 2   |               |          |                | 93.84      |       |                     |                     |
| <i>Macaca mulatta</i>      |             | 106994972 | 20  |               | 11       | 0020200020     | 91.21      | 626   |                     |                     |
| <i>Papio anubis</i>        |             | 101004328 | 20  |               |          |                | 90.42      | 627   |                     |                     |
| <i>Callithrix jacchus</i>  |             | 100895632 | 12  |               |          |                | 87.13      | 614   |                     |                     |
| <i>Microcebus murinus</i>  |             | 105885292 | 17  |               |          |                | 80.00      | 555   |                     |                     |

Table S51a. Genetic and molecular data of primate SDR42E family variants. For further details see Online Resources Table S39a.

| Enzyme  | Species                    | % identity | Enzyme  | Species                    | % identity |
|---------|----------------------------|------------|---------|----------------------------|------------|
| SDR42E1 | <i>Homo sapiens</i>        | 100.00     | SDR42E2 | <i>Homo sapiens</i>        | 100.00     |
|         | <i>Pan troglodytes</i>     | 98.98      |         | <i>Pan troglodytes</i>     | 97.84      |
|         | <i>Pan paniscus</i>        | 98.73      |         | <i>Pan paniscus</i>        | 95.50      |
|         | <i>Nomascus leucogenys</i> | 96.69      |         | <i>Nomascus leucogenys</i> | 93.84      |
|         | <i>Macaca mulatta</i>      | 96.18      |         | <i>Macaca mulatta</i>      | 91.21      |
|         | <i>Papio anubis</i>        | 95.93      |         | <i>Papio anubis</i>        | 90.42      |
|         | <i>Callithrix jacchus</i>  | 91.58      |         | <i>Callithrix jacchus</i>  | 87.13      |
|         | <i>Microcebus murinus</i>  | 87.50      |         | <i>Microcebus murinus</i>  | 80.00      |
| SDR42E2 | <i>Homo sapiens</i>        | 47.95      | SDR42E1 | <i>Homo sapiens</i>        | 47.95      |
|         | <i>Pan troglodytes</i>     | 48.21      |         | <i>Pan troglodytes</i>     | 47.95      |
|         | <i>Pan paniscus</i>        | 48.46      |         | <i>Pan paniscus</i>        | 47.69      |
|         | <i>Nomascus leucogenys</i> | 48.97      |         | <i>Nomascus leucogenys</i> | 47.69      |
|         | <i>Macaca mulatta</i>      | 48.21      |         | <i>Macaca mulatta</i>      | 47.69      |
|         | <i>Papio anubis</i>        | 47.44      |         | <i>Papio anubis</i>        | 47.95      |
|         | <i>Callithrix jacchus</i>  | 47.18      |         | <i>Callithrix jacchus</i>  | 48.07      |
|         | <i>Microcebus murinus</i>  | 48.84      |         | <i>Microcebus murinus</i>  | 47.04      |

Table S51b. Relative percent identity of primate SDR42E family protein variants.
