# Supplementary material for: Gene Structure Evolution of the Short-Chain Dehydrogenase/Reductase (SDR) Family
Source: MDPI journal article supplement (doi:10.3390/genes14010110), 2022-12-30
Supplement: s1 [file s1]

# VERTEBRATE SDR FAMILY VARIANTS.

|         |                  |                                                           |      |
|---------|------------------|-----------------------------------------------------------|------|
| SDR7C1  | H. sapiens       | -----MVELMF--PLLLLLLPFLLYMAAPQIrkML-SS-----GVCTSTVQLPGKV  | 1p.1 |
| SDR7C1  | G. gorilla       | -----MVELMF--PLLLLLLPFLLYVAAAPQIrkML-SS-----GVCTSTVQLPGKV | 1p.1 |
| SDR7C1  | M. musculus      | -----MFG--FLLLLSLPFILYLVTPKIrkML-SS-----GVCTSNVQLPGKV     | 1p.1 |
| SDR7C1  | M. domestica     | -----MFWL--LVLLASLVLLLVWATPYVreAV-SK-----GVCTSTVQLPGKV    | 1p.1 |
| SDR7C1  | P. formosa       | -----MFVLLIIAGLGVVTTLLVILFAPHIrrYA-AG-----AVCKSTARLDGKT   | 1p.1 |
| SDR7C2  | H. sapiens       | -----MLVT--LGLLTSEFFSFLYMVAPSIrkFF-AG-----GVCRTNVQLPGKV   | 1p.1 |
| SDR7C2  | P. troglodytes   | -----MLVT--LGLLTSEFFSFLYMVAPSIrkFF-AG-----GVCRTNVQLPGKV   | 1p.1 |
| SDR7C2  | M. musculus      | -----MLFI--LVLLTSFSLILYLTAPSIrkFF-AG-----GVCTTNVQIPGKV    | 1p.1 |
| SDR7C2  | M. domestica     | -----MIGI--MVGLTSFVSFLYMAGPYIrkFF-AG-----GVCTSTVQLPGKV    | 1p.1 |
| SDR7C2  | G. gallus        | MEPAAAGMLSCWGAVLGAASVPLLLAAAPYVrrYV-AG-----GRCRSTARLDGKV  | 1p.1 |
| SDR7C2  | A. carolinensis  | -----MSSTFSPPfrkWf-AG-----GVCTSTAMLHGKV                   | 1p.1 |
| SDR7C2  | D. rerio         | -----MMLALVAFAAGLGLVALILRLSPQIrkYA-AG-----GSCRSTVRLDGKV   | 1p.1 |
| SDR7C3  | H. sapiens       | -----MSR-----YLLPLSALGTVAGAAVLLkdYV-TG-----GACPSKATIPGKT  | 1p.1 |
| SDR7C3  | P. troglodytes   | -----MSR-----YLLPLSALGTVAGAAVLLkdYV-TG-----GACPSKATIPGKT  | 1p.1 |
| SDR7C3  | M. musculus      | -----MSR-----FLLPVSVVGTVIGGTVLLkdYV-AG-----GACPSKATIPGKT  | 1p.1 |
| SDR7C3  | X. tropicalis    | -----MNK-----YVVRASMVGTALGGAILLkdYT-GG-----GNCPSKASIIQGT  | 1p.1 |
| SDR7C3  | O. latipes       | -----MSK-----YILPVSVFGTVFGSAVLLkhHV-TG-----GRCPSKATITGKT  | 1p.1 |
| SDR7C4  | H. sapiens       | -----MA-VATAAAVLAALGGALWLAARRFVGPRVQRL-----RRGGDPGLMHGKT  |      |
| SDR7C4  | P. troglodytes   | -----MA-VATAAAVLAALGGALWLAARRFVGPRVQRL-----RRGGDPGLMHGKT  |      |
| SDR7C4  | M. musculus      | -----MAVASVAAALLAALGGALWLAARRFSGPRNQRL-----QGGGDPGLMHGKT  |      |
| SDR7C4  | M. domestica     | MRSRRRAMVSLSSVLLAALGGGLWLAARRYLRSFGRT-----AAGLMLMRGKT     |      |
| SDR7C4  | P. humilis       | -----MAA-----ALPALVLGAGLLVAARWLR---GA-----ARPGRGSGMRGKT   |      |
| SDR7C4  | A. carolinensis  | -----MAATAVVLAALGGGLLIARRFWQVAA-GA-----GAGKVVRGMEGKT      |      |
| SDR7C4  | X. tropicalis    | MAA-----SSPALMVAAVALGGGLILVVRRLSNS-----VRAGGSGLMRGKT      |      |
| SDR7C4  | D. rerio         | -----MSAAVVLAALVGGGVFFIARRIIIFRRKALR-----LMSYPPALMRGKT    |      |
| SDR7C5  | H. sapiens       | -----MEALLLGAGLLLGAYVLVYYNLVKA-----PPCGGMGNLRGRT          |      |
| SDR7C5  | P. abelii        | -----MEALLLGAGLLLGAYVLVYYNLVKA-----PPCGGMGNLRGRT          |      |
| SDR7C5  | M. musculus      | -----MEMLLLGAGLLLGAYVLVYYNLVKA-----PSCGGIGSLRGRT          |      |
| SDR7C5  | M. domestica     | -----MLLGSYVLIYYNFIKA-----VPCMSPINLKGKT                   |      |
| SDR7C5  | H. leucocephalus | -----MGWTLGAGLLLALYTLRHLRRS-----PPLRDRPELRGRT             |      |
| SDR7C5  | G. japonicus     | -----MVLSSLALTGLYVWLYYNFLRG-----PKCRNETSLRGKT             |      |
| SDR7C5  | X. tropicalis    | -----MVPVMLVVGLGIGAYILIYFNLRG-----RQCRSDASLKGKT           |      |
| SDR7C5  | O. latipes       | -----MCGFILIVFALAAY-MFHDIVVKG-----KRCKSNANLNGKT           |      |
| SDR40C1 | H. sapiens       | -----MSLYRS-----VVWFAK---GLREYTKsGYESACKDFVPHDLEVQIPGRV   | 1p.1 |
| SDR40C1 | P. troglodytes   | -----MSLYRS-----VVWFAK---GLREYTKsGYESACKDFVPHDLEVQVPGRV   | 1p.1 |
| SDR40C1 | B. taurus        | -----MLLYRS-----AAWFAK---GLREYTKsGYESASKDFVPDDLEVQVPGRA   | 1p.1 |
| SDR40C1 | G. gallus        | -----MSWYRN-----VWVFVK---GLREYTKsGYESASKHFDPADLEVVDVAGRS  | 1p.1 |
| SDR40C1 | A. carolinensis  | -----MSIYRN-----SVWFIK---GLNEYCKsGYESASKRFVPDGLVDVTGRS    | 1p.1 |
| SDR40C1 | X. tropicalis    | -----MSLYRN-----TIWFLK---GMREYTKsGYETAAKQFLSEDLFVDVRGRS   | 1p.1 |
| SDR40C1 | O. latipes       | -----MSIYRN-----AVWFMK---GLQEYTKsGYEAAAKHFVPNDLDVNLTGRS   | 1p.1 |

\*

x x x

|        |                |                                                      |      |
|--------|----------------|------------------------------------------------------|------|
| SDR7C1 | H. sapiens     | VVVTGANTGIGKETAKELAQRGARVYLACRDVEKGELVAKEIQTTTG----- | 2p.2 |
| SDR7C1 | G. gorilla     | VVVTGANTGIGKETAKELAQRGARVYLACRDVEKGELVAKEIQTTTG----- | 2p.2 |
| SDR7C1 | M. musculus    | AIVTGANTGIGKETAKDLAQRGARVYLACRDVKGELAAREIQAVTG-----  | 2p.2 |
| SDR7C1 | M. domestica   | VIVTGANTGIGKETAKDLAQRGARVYIACRDLQKGELAASEIRAKTG----- | 2p.2 |
| SDR7C1 | P. formosa     | VLITGANTGIGKETALDLAVRGARVIMACRDVEKGEEAAASIRAAYS----- | 2p.2 |
| SDR7C2 | H. sapiens     | VVITGANTGIGKETARELASRGARVYIACRDVLKGESAASEIRVDTK----- | 2p.2 |
| SDR7C2 | P. troglodytes | VVITGANTGIGKETARELASRGARVYIACRDVLKGESAASEIRVDTK----- | 2p.2 |
| SDR7C2 | M. musculus    | VVITGANTGIGKETARELARRGARVYIACRDVLKGESAASEIRADTK----- | 2p.2 |
| SDR7C2 | M. domestica   | VVVTGANTGIGKETAKDLARRGARVYIACRNILKGESAASEIRAATK----- | 2p.2 |
| SDR7C2 | G. gallus      | AVITGANTGIGKETARELARRGARVIVACRDIKAEAAAREIRAETD-----  | 2p.2 |

|         |                  |                                                                                 |           |
|---------|------------------|---------------------------------------------------------------------------------|-----------|
| SDR7C2  | A. carolinensis  | AVITGANTGIGKETARELAR <del>rg</del> ARVIIACRNTEKGEAAAHEIQRETG-----               | 2p.2      |
| SDR7C2  | D. rerio         | ALVTGANSIGIGKETALDLAS <del>rg</del> ARVILACRDLEKAEAAAAEIRTRVG-----              | 2p.2      |
| SDR7C3  | H. sapiens       | VIVTGANTGIGKQTALELAR <del>rg</del> GNIIILACRDMEKCEAAAKDIRGETL-----              | 2p.2      |
| SDR7C3  | P. troglodytes   | VIVTGANTGIGKQTALELAR <del>rg</del> GNIIILACRDMEKCEAAAKDIRGETL-----              | 2p.2      |
| SDR7C3  | M. musculus      | VIVTGANTGIGKQTALELAR <del>rg</del> GNVILACRDMEKCEVAAKDIRGETL-----               | 2p.2      |
| SDR7C3  | X. tropicalis    | VIVTGANTGIGKETALELAR <del>rg</del> GRIIMACRDMGKCENAAARDIRGKTL-----              | 2p.2      |
| SDR7C3  | O. latipes       | VVITGANTGIGKETARELAR <del>rg</del> GRILMGCARDMEKCETAAKEIRGATL-----              | 2p.2      |
| SDR7C4  | H. sapiens       | VLITGANSGLGRATAAELLRLGARVIMGCRDRARAEAAAGQLRRELQAAECGPEPGVSG                     |           |
| SDR7C4  | P. troglodytes   | VLITGANSGLGRATAAELLRLGARVIMGCRDRARAEAAAGQLRRELQAAECGPEPGVSG                     |           |
| SDR7C4  | M. musculus      | VLITGANSGLGRATAAELLRLGARVIMGCRDRARAEAAAGQLRQELCQAGGAGPDG---T                    |           |
| SDR7C4  | M. domestica     | VIVTGANSGLGRATAAELLRQEARVILACRDRGRAEQTAELRREQAQA---PPAAEGSP                     |           |
| SDR7C4  | P. humilis       | VIIITGANSGLGRAAAAELLRMARVIMGCRDRARAEAAAREIRA EVGER-----ADG                      |           |
| SDR7C4  | A. carolinensis  | VIIITGANSIGIRATAAELLRQHARVIMACRDPLRAEEAAARELRAELGVCAR---GGGEC                   |           |
| SDR7C4  | X. tropicalis    | VIIITGANCIGIGKATAAELVKQEARVILACRDQGRAEEAAAELRREAGE-----                         |           |
| SDR7C4  | D. rerio         | VIVTGANCIGIGKATAAELLKLQARVIMACRDRQRAEDAARDIQNQAG-----TS                         |           |
| SDR7C5  | H. sapiens       | AVV <del>tg</del> ANSIGIGKMTALELARRGARVVLACRSQERGEAAAFDLR <del>qe</del> SG----- | 1p.2 2p.0 |
| SDR7C5  | P. abelii        | AVV <del>tg</del> ANSIGIGKMTALELARRGARVVLACRSRERGEAAAFDLR <del>qe</del> SG----- | 1p.2 2p.0 |
| SDR7C5  | M. musculus      | VVV <del>tg</del> ANSIGIGKMTALELARRGARVVLACRSRERGEAAAFDLR <del>qe</del> SG----- | 1p.2 2p.0 |
| SDR7C5  | M. domestica     | AVV <del>tg</del> GNTGIGKMTALELAQRGARVVLACRSKEKGEAAVYDIR <del>ke</del> SG-----  | 1p.2 2p.0 |
| SDR7C5  | H. leucocephalus | AIV <del>tg</del> GSSGIGAATALELARC GARVVLATRNAPRGEAAARRIR <del>te</del> TG----- | 1p.2 2p.0 |
| SDR7C5  | G. japonicus     | VLI <del>tg</del> GNTGIGKETALDLARRGARIIMACRNKARAEAAVYDIR <del>re</del> SG-----  | 1p.2 2p.0 |
| SDR7C5  | X. tropicalis    | VIV <del>tg</del> ANVGIGKMTALDMAKRGARVILACRVKTEGAAAYDIR <del>k</del> LSG-----   | 1p.2 2p.0 |
| SDR7C5  | O. latipes       | AIV <del>tg</del> SNTGIGKATAIELAKRGARVILACRSKQRGEAALEDVR <del>rv</del> TG-----  | 1p.2 2p.0 |
| SDR40C1 | H. sapiens       | FLVTGGNSGIGKATALEIAK <del>rg</del> GTVHLVCRDQAPAEARGEI IRESG-----               | 2p.2      |
| SDR40C1 | P. troglodytes   | FLVTGGNSGIGKATALEIAK <del>rg</del> GTVHLVCRDQARAEDARDEI IRESS-----              | 2p.2      |
| SDR40C1 | B. taurus        | FMVTGGNSGIGKATAMEIAK <del>rg</del> GTVHLVCRDHSRAEGAKAEI IRESG-----              | 2p.2      |
| SDR40C1 | G. gallus        | FLITGSNSGIGKAAAKEIAR <del>rg</del> GTVHLVCRNKERAEDAKGEIVTETG-----               | 2p.2      |
| SDR40C1 | A. carolinensis  | FMVTGANSIGIGKATAKEIAK <del>rg</del> GIIHLVCRNKDRGEEAKKEITTETG-----              | 2p.2      |
| SDR40C1 | X. tropicalis    | YMITGANSIGIGKAAALVIAK <del>kg</del> GTTIHLVCRNKERAEEAQRELKANSG-----             | 2p.2      |
| SDR40C1 | O. latipes       | FMVTGANSIGIGKAAAQEIAA <del>rg</del> GTVHMVCRNKGRAEAAKEEIVERISK-----             | 2p.2      |
|         |                  | *** * *                                                                         |           |

|        |                 |                                                                             |      |
|--------|-----------------|-----------------------------------------------------------------------------|------|
| SDR7C1 | H. sapiens      | NQQVLVRKLDLSDTKSIRAFAGKFL <del>ae</del> EKHLHLVLIINNAGVMMCPYSKTADGFEMHIGVNH | 3p.2 |
| SDR7C1 | G. gorilla      | NQQVLVRKLDLSDTKSIRAFAGKFL <del>ae</del> EKHLHLVLIINNAGVMMCPYSKTADGFEMHIGVNH | 3p.2 |
| SDR7C1 | M. musculus     | NSQVVRKLDLADTKSIRAFAGKFL <del>ae</del> EKHLHLVLIINNAGVMMCPYSKTADGFEMHIGVNH  | 3p.2 |
| SDR7C1 | M. domestica    | NQQVLVRKLDLSDTKSIRAFAGKFL <del>ae</del> EKHLHLVLIINNAGVMMCPYSKTADGFEMHIGVNH | 3p.2 |
| SDR7C1 | P. formosa      | EAKVEVRELDLADTKSIRAFAGKFL <del>re</del> VNHLHLVLIINNAGVMMCPYTKTIDGFEMHIGVNH | 3p.2 |
| SDR7C2 | H. sapiens      | NSQVLVRKLDLSDTKSIRAFAGKFL <del>ae</del> EKQLHLVLIINNAGVMMCPYSKTADGFETHLGVNH | 3p.2 |
| SDR7C2 | P. troglodytes  | NSQVLVRKLDLSDTKSIRAFAGKFL <del>ae</del> EKQLHLVLIINNAGVMMCPYSKTADGFETHLGVNH | 3p.2 |
| SDR7C2 | M. musculus     | NSQVLVRKLDLSDTKSIRAFAGKFL <del>ae</del> EKQLHLVLIINNAGVMMCPYSKTADGFETHLGVNH | 3p.2 |
| SDR7C2 | M. domestica    | NQQVVRKLDLSDTKSIRAFAGKFL <del>ae</del> EKQLHLVLIINNAGVMMCPYSKTADGFETHLGVNH  | 3p.2 |
| SDR7C2 | G. gallus       | NQEVIVKKLDLADTKSIRAFAGKFL <del>ae</del> EKQLHLVLIINNAGVMMCPYSKTADGFETHLGVNH | 3p.2 |
| SDR7C2 | A. carolinensis | NQQVIVKKLDLSDTKSIRAFAGKFL <del>ke</del> EDKLHLVLIINNAGVMMCPYSKTADGFETHLGVNH | 3p.2 |
| SDR7C2 | D. rerio        | GAKVEVRELDLADTKSIRAFAGKFL <del>re</del> VDHLHLVLIINNAGVMMCPYMKTADGFEMQIGVNH | 3p.2 |
| SDR7C3 | H. sapiens      | NHHVNARHLDLASLKSIRFAAKII <del>ee</del> EERVDILINNAGVMRCPHWTTEDGFEMQFGVNH    | 3p.2 |
| SDR7C3 | P. troglodytes  | NHHVNARHLDLASLKSIRFAAKII <del>ee</del> EERVDILINNAGVMRCPHWTTEDGFEMQFGVNH    | 3p.2 |
| SDR7C3 | M. musculus     | NPRVRAERLDLADTKSIRFAAKII <del>ee</del> EERVDILINNAGVMRCPHWTTEDGFEMQFGVNY    | 3p.2 |
| SDR7C3 | X. tropicalis   | NHNVFARHLDLASLKSIRFAAKII <del>ee</del> EERVDILINNAGVMRCPHWTTEDGFEMQFGVNH    | 3p.2 |
| SDR7C3 | O. latipes      | NPHVYACHLDLADTKSIRFAAKII <del>ee</del> EERVDILINNAGVMRCPHWTTEDGFEMQFGVNH    | 3p.2 |
| SDR7C4 | H. sapiens      | VGELIVRELDLADTKSIRAFAGKFL <del>qe</del> EPRLDVLINNAGIFQCPYMKTEDGFEMQFGVNH   | 1p.0 |
| SDR7C4 | P. troglodytes  | VGELIVRELDLADTKSIRAFAGKFL <del>qe</del> EPRLDVLINNAGIFQCPYMKTEDGFEMQFGVNH   | 1p.0 |
| SDR7C4 | M. musculus     | DGQVLVVKELDLADTKSIRAFAGKFL <del>qe</del> EPRLDVLINNAGVVFHCPYTKTEDGFEMQFGVNH | 1p.0 |
| SDR7C4 | M. domestica    | AGELIVKELDLADTKSIRAFAGKFL <del>le</del> EPRLDVLINNAGVVFHCPYTKTEDGFEMQFGVNH  | 1p.0 |
| SDR7C4 | P. humilis      | AGELIVRELDLADTKSIRAFAGKFL <del>qe</del> ESRLDVLINNAGIFQCPYMKTEDGFEMQFGVNH   | 1p.0 |
| SDR7C4 | A. carolinensis | RGELIVRELDLADTKSIRAFAGKFL <del>qe</del> EPRLDVLINNAGIFQCPYTKTEDGFEMQFAVNH   | 1p.0 |
| SDR7C4 | X. tropicalis   | RGEIVIKQLDLGSLQSVRRFCQEV <del>ke</del> EPRLDVLINNAGVVFHCPYTKTEDGFEMQFGVNH   | 1p.0 |

|         |                  |                                                               |      |      |
|---------|------------------|---------------------------------------------------------------|------|------|
| SDR7C4  | D. rerio         | QGEIVIKHLDLASLQSVRRFCEEVIreEPRIDVLINNAGLYQCPYSKTEEGFEMQLGVNH  | 1p.0 |      |
| SDR7C5  | H. sapiens       | NNEVIFMALDLASLASVRAFATAFLSSEPRLDILIHnagISSCG--RTREAFNLLLRVNH  | 3p.2 |      |
| SDR7C5  | P. abelii        | NNEVIFMALDLASLASVRAFATAFLSSEPRLDILIHnagISSCG--RTREAFNLLLRVNH  | 3p.2 |      |
| SDR7C5  | M. musculus      | NNEVIFMALDLASLASVQAFATAFLSSEPRLDVLIHnagISSCG--RTRETFNLLLRVNH  | 3p.2 |      |
| SDR7C5  | M. domestica     | NNEVIFMMLDLSSLTSVHSFATAFLSSEPRLDLIIHnagISSCG--KAKENFNLIILRVNH | 3p.2 |      |
| SDR7C5  | H. leucocephalus | NAEVLFMQLDLASLRSVRAFASAFRLRQEPHLHLLINNagVSVGG--TTEDGFSLPFQVNH | 3p.2 |      |
| SDR7C5  | G. japonicus     | NNEVLFMSLDLADLSSVRAFVDAFLRSEPRLDILINNagVQSSG--KSADGFDLTFQVNH  | 3p.2 |      |
| SDR7C5  | X. tropicalis    | NNQVVFMKLDLASLESVRSFCRAFLSSEPRLDILINNagLSGFG--KTAEGYNIVFGVNH  | 3p.2 |      |
| SDR7C5  | O. latipes       | STQVLFMQLDLGSLKSVRNFAETFLKTESRLDILINNagLYMQG--RTEDGFGMMFGVNH  | 3p.2 |      |
| SDR40C1 | H. sapiens       | NqnIFLHIVDLSDPKQIWKFVENFK-QEHKLHVliNNAGCMVNKRELTEDGLEKNFAANT  | 3p.0 | 4p.0 |
| SDR40C1 | P. troglodytes   | NqnIFLHIVDLSDPKQIWKFVENFK-QEHKLHVliNNAGCMVNKRELTEDGLEKNFAANT  | 3p.0 | 4p.0 |
| SDR40C1 | B. taurus        | NqnIFLHIVDLSLPKSVVKFVENFK-QEHTLNVliNNAGCMVNKRELTEDGLEKNFATNT  | 3p.0 | 4p.0 |
| SDR40C1 | G. gallus        | NqnIFLHVVDISNPKEIWKFAEKFK-NEHKLNVliNNAGCMVNNRELTEDGLEKNFATNT  | 3p.0 | 4p.0 |
| SDR40C1 | A. carolinensis  | NqkVFVHILDMSDPKGIWKFGQFK-NEHRLNVliNNAGCMVNKRELTENGLEKNFATNT   | 3p.0 | 4p.0 |
| SDR40C1 | X. tropicalis    | NedISVHLLDMSDPKQIWEFAEKFK-TEHKLNVliNNAGCMVNKRELTEDGLEKNFATNT  | 3p.0 | 4p.0 |
| SDR40C1 | O. latipes       | NenVHVHIVDMSSAKQVWEFAQNFS-QNNKIHVliNNAGCMVNQRELTDEGLEKNFATNT  | 3p.0 | 4p.0 |

\* \* \* \*

|         |                  |                                                               |      |      |
|---------|------------------|---------------------------------------------------------------|------|------|
|         |                  |                                                               |      | +    |
| SDR7C1  | H. sapiens       | lgHFLLTHTLLLEKLKESAPSRIVNVSSLAHHLGRIHFHNLQGE-----KFYNAGLAYC   | 4p.2 |      |
| SDR7C1  | G. gorilla       | lgHFLLTHTLLLEKLKESAPSRIVNVSSLAHHLGRIHFHNLQGE-----KFYNAGLAYC   | 4p.2 |      |
| SDR7C1  | M. musculus      | lgHFLLTHTLLLEKLKESAPSRIVNVSSLGHHLGRIHFHNLQGE-----KFYSAGLAYC   | 4p.2 |      |
| SDR7C1  | M. domestica     | lgHFLLTHTLLLERLKESAPSRVNVNLSLAFHLGRIHFYNLHGE-----KYNRGLAYC    | 4p.2 |      |
| SDR7C1  | P. formosa       | lgHFLLTHTLLIGLTKRSAPARVVVVSSLAHNFGWIRFHDLSHQ-----GSYNSGLAYC   | 4p.2 |      |
| SDR7C2  | H. sapiens       | lgHFLLTHTLLERLKVSAPARVVNVSSVAHHIGKIPFHDQSE-----KRYSRGFAYC     | 4p.2 |      |
| SDR7C2  | P. troglodytes   | lgHFLLTHTLLERLKVSAPARVVNVSSVAHHIGKIPFHDQSE-----KRYSRGFAYC     | 4p.2 |      |
| SDR7C2  | M. musculus      | lgHFLLTHTLLERLKESAPARVVNLSIAHLIGKIRFHDQGG-----KRYCSAFAYG      | 4p.2 |      |
| SDR7C2  | M. domestica     | lgHFLLTHTLLERLKESAPSRVNVNSSVGHHLGRIFFQDLQGE-----KYNRSYAYC     | 4p.2 |      |
| SDR7C2  | G. gallus        | lgHFLLTHTLLERLKQSAPSRIVNVSSLAHHGGRIFFHDNLGE-----KSYNRGLAYC    | 4p.2 |      |
| SDR7C2  | A. carolinensis  | lgHFLLTHTLLDRLKESAPARIVNVSSLAHILGKIYFQDLQGE-----KCYSAQFAYF    | 4p.2 |      |
| SDR7C2  | D. rerio         | lgHYLLTHTLLIGLTKRSAPSRIVNVSSLAHNFGWIRFHDLSHQ-----GSYNSGLAYC   | 4p.2 |      |
| SDR7C3  | H. sapiens       | lgHFLLTHTLLDCLKASAPSRIINLSSLAHVAGHIDFDDLNWQT-----RKYNTKAAYC   | 4p.2 |      |
| SDR7C3  | P. troglodytes   | lgHFLLTHTLLDCLKASAPSRIINLSSLAHVAGHIDFDDLNWQT-----RKYNTKAAYC   | 4p.2 |      |
| SDR7C3  | M. musculus      | lgHFLLTHTLLDCLKASAPSRIINLSSLAHVAGHIDFEDLNWQM-----KKYDTKAAYC   | 4p.2 |      |
| SDR7C3  | X. tropicalis    | lgHFLLTHTLLLEKMKRSNSRIINVSSLAHIAGDIDFDDLNWEK-----KKYNTKAAYC   | 4p.2 |      |
| SDR7C3  | O. latipes       | lgHFLLTHTLLLEKLKEPAPSRVINLSSLAHIIGNIDFEDLNWEK-----KTFTDKQAYC  | 4p.2 |      |
| SDR7C4  | H. sapiens       | LGHFLLTNLLLGLLKSSAPSRIVNVSSSKLYKYGDINFDDLNSE-----QSYNKSFCYS   |      |      |
| SDR7C4  | P. troglodytes   | LGHFLLTNLLLGLLKSSAPSRIVNVSSSKLYKYGDINFDDLNSE-----QSYNKSFCYS   |      |      |
| SDR7C4  | M. musculus      | LGHFLLTNLLLGLLKSSAPSRIVNVSSSKLYKYGEINFEDLNSE-----QSYNKSFCYS   |      |      |
| SDR7C4  | M. domestica     | LGHFLLTNLLLDRLKDSAPSRIVNVSSSKLYKYGEINFEDLNSE-----LNYNKSFCYS   |      |      |
| SDR7C4  | P. humilis       | LGHFLLTNLLLGLLKNSAPSRIVNVSSSKLYKYGEINFEDLNSE-----ISYNKSFCYS   |      |      |
| SDR7C4  | A. carolinensis  | LGHFLLTNLLLGLLKSSAPSRIVNVSSSKLYKYGEINFDDLNSE-----LSYNKSFCYS   |      |      |
| SDR7C4  | X. tropicalis    | LGHFLLTHLLLGLLKSSAPSRIVNVSSSKLYKYGEINFDDLNSE-----KSYRSFGYS    |      |      |
| SDR7C4  | D. rerio         | LGHFLLTNLLLDLLKQSSPSRVVVSSSKLYKYGSINFEDLNSE-----QSYNKSFCYS    |      |      |
| SDR7C5  | H. sapiens       | IGPFLLTHTLLPCLKACAPSRVVVVASAAHRCRGLDFKRLDRPV----V-GWRQELRAYA  |      |      |
| SDR7C5  | P. abelii        | IGPFLLTHTLLPCLKACAPSRVVVVASAAHRRGRGLDFKRLDRPV----V-GWRQELRAYA |      |      |
| SDR7C5  | M. musculus      | VGPFLLTHTLLPRLRSCAPSRVIVSSAAHRRGRGLDFTRLDPCV----V-GWQQELRAYA  |      |      |
| SDR7C5  | M. domestica     | VGPFLLTHTLLPRLKANAPSRVVVMASAAHRRGRGLDFSRLDCPV----W-GWQQELRAYA |      |      |
| SDR7C5  | H. leucocephalus | LGHFLLTHTLLERLQSCAPSRVIVASRAHCAGRLRPNTLGRPP----S-GLFSAFQDYC   |      |      |
| SDR7C5  | G. japonicus     | LSHFLMTHTLLDRLKCCAPSRVVVVASRAHRIGKINFQNIHKPV----LGGLVKYFQAYC  |      |      |
| SDR7C5  | X. tropicalis    | LGHFLLTHTLLDRLKQSTPSRIVVLASAHAWGKIDFNKISVPS----E-HVKDTLQSYC   |      |      |
| SDR7C5  | O. latipes       | LGHFLLTNLLDRLKECGPSRIVNVSSSAHNVGNVNFDCNLTHKDLGVATSTRDALQMYC   |      |      |
| SDR40C1 | H. sapiens       | lgVYILTTLGLIPVLEKEHDPriTVSSGGMLVQKLNTNDLQSER-----TPFDGTMVYA   | 5p.2 | 6p.0 |
| SDR40C1 | P. troglodytes   | lgVYILTTLGLIPVLEKEHDPriTVSSGGMLAQLSTNDLQSER-----TPFDGTMVYA    | 5p.2 | 6p.0 |
| SDR40C1 | B. taurus        | lgVYVLTTLALIPVLEKEHDPriTVSSGGMLVQKLNTDDPQSER-----TAFDGTMVYA   | 5p.2 | 6p.0 |
| SDR40C1 | G. gallus        | lgTYVLTALLPLLEKEADARvvTVSSGGMLVQKLNISDLQSGS-----ETFDGTMVYA    | 5p.2 | 6p.0 |

|         |                 |                                                  |                    |      |      |      |
|---------|-----------------|--------------------------------------------------|--------------------|------|------|------|
| SDR40C1 | A. carolinensis | lgPYILTTVLLPLLEKEDDP <i>rv</i> iTVSSGGMLVQKLNVS  | DLQ TEN-----TTFDGT | MVYA | 5p.2 | 6p.0 |
| SDR40C1 | X. tropicalis   | lgTYILTTALLPSLEKEEDDP <i>rv</i> iTVSSGGMLVQKLNVS | DLQ FET-----GTFDGT | MAYA | 5p.2 | 6p.0 |
| SDR40C1 | O. latipes      | lgTYILTTALIPSLKQVEDDP <i>rv</i> iTVSSGGMLTQKLNVD | DLQ FEK-----GAFDGT | MAYA | 5p.2 | 6p.0 |

\* \* \* \* \*

|         |                  |                                                                |      |      |
|---------|------------------|----------------------------------------------------------------|------|------|
| SDR7C1  | H. sapiens       | HSKLANILFTQELARRLkgSGVTTYSVHPGTVQSELV-RHSSFM-----RMMWWLFSFF    | 5p.2 |      |
| SDR7C1  | G. gorilla       | HSKLANILFTQELARRLkgSGVTTYSVHPGTVQSELV-RHSSFM-----RMMWWLFSFF    | 5p.2 |      |
| SDR7C1  | M. musculus      | HSKLANILFTKELAKRLkgSGVTTYSVHPGTVHSELT-RYSSIM-----RWLWQLFFVF    | 5p.2 |      |
| SDR7C1  | M. domestica     | HSKLANVLFTQELSRRLkgTGVTTYSVHPGTVDSDLF-RHSLFL-----KLLVKLFSSF    | 5p.2 |      |
| SDR7C1  | P. formosa       | QSKLANVLFARELARRLkgTNVMVNSVHPGTVNSDLT-RHSTLM-----MILFTVFSVF    | 5p.2 |      |
| SDR7C2  | H. sapiens       | HSKLANVLFTRELAKRLqgTGVTTYAVHPGVVRSELV-RHSSLL-----CLLWRLFSPF    | 5p.2 |      |
| SDR7C2  | P. troglodytes   | HSKLANVLFTRELAKRLqgTGVTTYAVHPGVVRSELV-RHSSLL-----CLLWRLFSPF    | 5p.2 |      |
| SDR7C2  | M. musculus      | HSKLANLLFTRELAKRLqgTGVTAAYVHPGVVLEIT-RNSYLL-----CLLWRLFSPF     | 5p.2 |      |
| SDR7C2  | M. domestica     | NSKLANVLFTRELAYRLkgTGVTTYAVHPGLVQSELV-RHSFLM-----CLLWRLLTPI    | 5p.2 |      |
| SDR7C2  | G. gallus        | HSKLANVLFTRELARRLqgTKVTANSLHPGVSVHSELV-RHSFVM-----TWLWRFISFF   | 5p.2 |      |
| SDR7C2  | A. carolinensis  | QSKLANILFTRELAGRLqgTGVTVNALHPGAVLSELG-RHSYVA-----KFLQRVFNFM    | 5p.2 |      |
| SDR7C2  | D. rerio         | QSKLANVLFTRELARRLqgSNVTNSVHPGTVRSELV-RHSTLM-----SLLFAFFSMF     | 5p.2 |      |
| SDR7C3  | H. sapiens       | QSKLAIVLFTKELSRRLqgSGVTVNALHPGVARTELG-RHTGIHGSTFSSTTlgPIFWLL   | 5p.2 | 6p.2 |
| SDR7C3  | P. troglodytes   | QSKLAIVLFTKELSRRLqgSGVTVNALHPGVARTELG-RHTGIHGSTFSSTTlgPIFWLL   | 5p.2 | 6p.2 |
| SDR7C3  | M. musculus      | QSKLAVVLFTKELSHRLqgSGVTVNALHPGVARTELG-RHTGMHNSAFSGFMlgPFFWLL   | 5p.2 | 6p.2 |
| SDR7C3  | X. tropicalis    | QSKLANVLFTNELAKRLqgTKLTANSVHPGTVADTELG-RHTGMHQSAFSSSTIlaPLFWFL | 5p.2 | 6p.2 |
| SDR7C3  | O. latipes       | QSKLANVLFTRELAKRLqgTGVTVNAVHPGVVATELG-RHTGLHQSQFSFmlgPFFSLL    | 5p.2 | 6p.2 |
| SDR7C4  | H. sapiens       | RSKLANILFTRELARRLEGTNVTNVNLHPGIVRTNLG-RHIHIP--LLVKPLFNLVSWAF   |      |      |
| SDR7C4  | P. troglodytes   | RSKLANILFTRELARRLEGTNVTNVNLHPGIVRTNLG-RHIHIP--LLVKPLFNLVSWAF   |      |      |
| SDR7C4  | M. musculus      | RSKLANILFTRELARRLEGTNVTNVNLHPGIVRTNLG-RHIHIP--LLARPLFNLVSWAF   |      |      |
| SDR7C4  | M. domestica     | QSKLANILFTRELARRLEGTNVTNVNLHPGIVRTNLG-RHINIP--LLVKPLFNLVSWAF   |      |      |
| SDR7C4  | P. humilis       | RSKLANILFARELARRLEGTVNSLHPGIVRTNLG-RHVNIP--LLAKPLFNLVSWAF      |      |      |
| SDR7C4  | A. carolinensis  | RSKLANILFTRELASHRLEGTVSVNVNLHPGVVRTNLG-RYVHIP--LLARPLFNLVSWAF  |      |      |
| SDR7C4  | X. tropicalis    | RSKLANILFTRELASRLEGTVSVNVNLHPGIVRTNLG-RHINIP--ILIKPLFNVVSWAF   |      |      |
| SDR7C4  | D. rerio         | QSKLANLLFTRELARRLDGTEVTVNALTPGIVRTRLG-RHVNIP--LLIKPLFWLVSWLF   |      |      |
| SDR7C5  | H. sapiens       | DTKLANVLFARELANQLEATGVTCYAAHpgPVNSELFLRHVPG---WLRPLLRLPLAWLV   | 4p.2 |      |
| SDR7C5  | P. abelii        | DTKLANVLFARELANQLEGTGVTCYAAHpgPVNSELFLRHVPG---WLRPLLRLPLAWLV   | 4p.2 |      |
| SDR7C5  | M. musculus      | DSKLANVLFARELATQLEGTVTCYAAHpgPVNSELFLRHLPG---WLRPILRLPLAWLV    | 4p.2 |      |
| SDR7C5  | M. domestica     | DSKLANVLFTRELATQLEGSGVTCYAAHpgPVNSELFLRHVPG---WLHLLSPLAWLV     | 4p.2 |      |
| SDR7C5  | H. leucocephalus | DSKLANVLHARELATHLQGTQVTCYAVHpgFVNTELF-RHTPL---WLKPLFLPLAWLF    | 4p.2 |      |
| SDR7C5  | G. japonicus     | NSKLANILYRELANRLEGTSVTCYALHpgTVNTELF-RHASI---WLKLIVGPLCWLF     | 4p.2 |      |
| SDR7C5  | X. tropicalis    | DSKLCNVLFARELANRLQGTSVTCYSVHpgTVHTNLA-RSLPS---WIKVLIEPVSWLF    | 4p.2 |      |
| SDR7C5  | O. latipes       | DSKLCNVLFTHELAKRLEGTKVTCYSLHpgAISTELK-RNAGS---ILQFSLTFASVFF    | 4p.2 |      |
| SDR40C1 | H. sapiens       | QNkrQQVVLTERWAQGHP--AIHFSSMHPGWADTpgV-RQA-----MPGFHARFGDR      | 7p.0 | 8p.2 |
| SDR40C1 | P. troglodytes   | QNkrQQVVLTERWAQGH--AIHFSSMHPGWADTpgV-RQA-----MPGFHARFRDR       | 7p.0 | 8p.2 |
| SDR40C1 | B. taurus        | QNkrQQVVLTERWARAHP--AIHFSCMHPGWVDTpgV-RLS-----MPGFHARLGAR      | 7p.0 | 8p.2 |
| SDR40C1 | G. gallus        | QNkrQQVVLTEQWAKTHR--SIHFSVMHPGWADTpaV-RSS-----MPDFYQKMKN       | 7p.0 | 8p.2 |
| SDR40C1 | A. carolinensis  | QNkrQQVVMTEQWAKAHP--SIHFSMHPGWANTpaV-QSS-----MPDFYEKMKNK       | 7p.0 | 8p.2 |
| SDR40C1 | O. latipes       | QNkrQQVVLTDKWAQHK--DIHFSSMHPGWADTpaV-QSS-----MPSFHAKMQSK       | 7p.0 | 8p.2 |
| SDR40C1 | X. tropicalis    | QNkrQQVILTEQWAKANP--NVHFSVMHPGWADTpaV-RSS-----MPDFYEKMKNR      | 7p.0 | 8p.2 |

\* \* \*

|        |                |                                                              |      |
|--------|----------------|--------------------------------------------------------------|------|
| SDR7C1 | H. sapiens     | IKTPQQGAQTSLHCALTEG-LEILSGNHFSdCHVAWV-SAQARNETI---ARRLWDVSCD | 6p.1 |
| SDR7C1 | G. gorilla     | IKTPQQGAQTSLHCALTEG-LEILSGNHFSdCHVAWV-SAQARNETI---ARRLWDVSCD | 6p.1 |
| SDR7C1 | M. musculus    | IKTPQEGAQTSLYCALTEG-LESLSGSHFSdCQLAWV-SYQGRNEII---ARRLWDVSCD | 6p.1 |
| SDR7C1 | P. formosa     | LKTPLEGAQTSVYCAVAEE-LHSVSGKHFSdCAPAFV-APQGRSEET---ASKLWDVSCE | 6p.1 |
| SDR7C1 | M. domestica   | IKTPQEGAQTSLYCALTEG-LEPLSGNHFSdCRPAWI-SSRGRNMTT---AMRLWDASCN | 6p.1 |
| SDR7C2 | H. sapiens     | VKTAREGAQTSLHCALAEG-LEPLSGKYFSdCKRTWV-SPRARNNKT---AERLWNVSCE | 6p.1 |
| SDR7C2 | P. troglodytes | VKTAREGAQTSLHCALAEG-LEPLSGKYFSdCKRTWV-SPRARNNKT---AERLWNVSCE | 6p.1 |
| SDR7C2 | M. musculus    | FKSTSQGAQTSLHCALAED-LEPLSGKYFSdCKRMWV-SSRARNNKT---AERLWNVSCE | 6p.1 |

|         |                  |                                                                 |      |
|---------|------------------|-----------------------------------------------------------------|------|
| SDR7C2  | M. domestica     | MKTTSQGAQTSLHCALAEG-IESQSGRYFsdCRKAWV-SPKGRNNKT---ARRLWDVSCE    | 6p.1 |
| SDR7C2  | G. gallus        | LKTPWEGAQTSVYCAVAEE-LESVTGQYFsdCQPAYV-SPWGRDDET---AKKLWNVSCE    | 6p.1 |
| SDR7C2  | A. carolinensis  | WKTVEEGAQTTVHCAVAEE-LESVTGEYFsdCKPAWV-APQGLDENT---AKKLWKVSCE    | 6p.1 |
| SDR7C2  | D. rerio         | LKSPKEGAQTSIYCAVAEE-LQISGKHFSdCAPAFV-APQGRSEET---ARKLWDVSCE     | 6p.1 |
| SDR7C3  | H. sapiens       | VKSPELAAQPSTYLAVAEE-LADVSGKYFDGLKQKAP-APEAEDEEV---ARRLWAESAR    |      |
| SDR7C3  | P. troglodytes   | VKSPELAAQPSTYLAVAEE-LADVSGKYFDGLKQKAP-APEAEDEEV---AQRLWAESAR    |      |
| SDR7C3  | M. musculus      | FKSPQLAAQPSTYLAVAEE-LENVSGKYFDGLREKAP-SPEAEDEEV---ARRLWTESAR    |      |
| SDR7C3  | X. tropicalis    | VKSPKQAAQPSVYLAVAEN-LQGVSGKYFNALKEKEP-APQALDEES---ARKLWEESAK    |      |
| SDR7C3  | O. latipes       | VKSPALGAQPSVFLAVSEE-MEGVTGRYDVMTKEKEP-AAQALDDEV---ACRLWEVSSR    |      |
| SDR7C4  | H. sapiens       | FKTPVEGAQTSIYLASSPE-VEGVSGRYFGDCKEEEL-LPKAMDES-VEV---ARKLWDISEV |      |
| SDR7C4  | P. troglodytes   | FKTPVEGAQTSIYLASSPE-VEGVSGRYFGDCKEEEL-LPKAMDES-VEV---ARKLWDISEV |      |
| SDR7C4  | M. musculus      | FKTPLEGAQTSIYLACSPD-VEGVSGRYFGDCKEEEL-LPKAMDES-VEV---ARKLWDISEV |      |
| SDR7C4  | M. domestica     | FKTPEEGAQTSIYLASSAE-VEGVSGRYFGDCKEEEL-LPKAMDDSV---ARKLWDISEV    |      |
| SDR7C4  | P. humilis       | FKTPLEGAQTSIYLASSPD-VEGVSGRYFGDCKEEEL-LPKAMDDL-VEV---ARKLWDISEV |      |
| SDR7C4  | A. carolinensis  | FKSPLEGAQTSVYLASSPE-VEGVSGRYFGDCKEEEL-LPKAMDDL-VEV---ARKLWDISEV |      |
| SDR7C4  | X. tropicalis    | FKSPEEGAQTSIYLASSPE-VEGVSGSYFGNSKEEEL-LPKAMDDL-VEV---ARKLWDISEV |      |
| SDR7C4  | D. rerio         | FKSPLEGAQTPLYLACSP-VEGVSGKCFANCEEEQL-LSKATDDHA---AKRLWDLSES     |      |
| SDR7C5  | H. sapiens       | LRAPRGGAQTPLYCALQEG-IEPLSGRYFANCHVEEV-PPAARDRA---AHRLWEASKR     |      |
| SDR7C5  | P. abelii        | LRAPRGGAQTPLYCALQEG-IEPLSGRYFANCHVEEV-PPAARDRA---AHRLWEASKR     |      |
| SDR7C5  | M. musculus      | LRAPQGGGAQTPLYCALQEG-IEPLSGRYFANCHVEEV-SPAARDQA---AQRLWKATKK    |      |
| SDR7C5  | M. domestica     | LRTPRGGAQTPLHCALQEG-IEPLSGRYFANCHVEEV-PTTARDRA---ARRLWEASEK     |      |
| SDR7C5  | H. leucocephalus | FLDAAEGAQTSLHCATQEG-IERFSGRYFADCRLQEP-WPPARDRL---ARALWEASER     |      |
| SDR7C5  | G. japonicus     | LRDPVNGAQTIIYCATQEG-IERFSGHYFANCKLQEP-YPQARDDAI---AKKLWEFSEK    |      |
| SDR7C5  | X. tropicalis    | LRTPMNGAQTSIYCAVQEG-IEMYSGRYFDNCQVRQV-KPHARDDAV---AKKLWEVSEK    |      |
| SDR7C5  | O. latipes       | FKDAEQGSQTTLHCALQEG-IEHLSGRYFSNCTVRDV-FARAKDDAT---AKKLWELSER    |      |
| SDR40C1 | H. sapiens       | LRSEAQGADTMLWLALSSAAAAQPSGRFFqdrKPVSTHLPLATSSSPAEEEEKLIEILEQ    | 9p.2 |
| SDR40C1 | P. troglodytes   | LRSEAQGADTVLWLALSSAAAAQPSGRFFqdrKPVSTHLPLARTSSSPAEEEEKLIEILEQ   | 9p.2 |
| SDR40C1 | B. taurus        | LRSEAQGADTVLWLALAPATAQPSGCFqdrKPPATHLPLARTSSSPAEEEEKLIEILEE     | 9p.2 |
| SDR40C1 | G. gallus        | LRTEAQGADTVVWLAVSSEAAKLPSGLFFqdrQSVPKHLPLARTHSPPGDEEKLMEVLEE    | 9p.2 |
| SDR40C1 | A. carolinensis  | LRTEAQGADTVVWLAVSSAARKQASGLFFqdrREPVATHLPLAWTKSSPGDDEKLMQVLEE   | 9p.2 |
| SDR40C1 | X. tropicalis    | LRTEEQGADTVVWLTLSPSAKKHPSGLFFqdrKPVSTHLPLFALTHSSPGDEEKLMEVLEE   | 9p.2 |
| SDR40C1 | O. latipes       | LRTEAMGADTVVWLAVSAAAIKQPSGLFFqdrKPVPTHPLAWSRPSAQDEDQLAALQE      | 9p.2 |

\*

\*

|        |                 |                             |  |
|--------|-----------------|-----------------------------|--|
| SDR7C1 | H. sapiens      | LLGLPID-----                |  |
| SDR7C1 | G. gorilla      | LLGLPID-----                |  |
| SDR7C1 | M. musculus     | LLGLPVDW-----               |  |
| SDR7C1 | M. domestica    | MLGIQQD-----                |  |
| SDR7C1 | P. formosa      | LLGIDWD-----                |  |
| SDR7C2 | H. sapiens      | LLGIRWE-----                |  |
| SDR7C2 | P. troglodytes  | LLGIRWE-----                |  |
| SDR7C2 | M. musculus     | LLGIQWE-----                |  |
| SDR7C2 | M. domestica    | LLGI-----                   |  |
| SDR7C2 | G. gallus       | LLGIQWD-----                |  |
| SDR7C2 | A. carolinensis | LLGIQWQ-----                |  |
| SDR7C2 | D. rerio        | LLGIEWD-----                |  |
| SDR7C3 | H. sapiens      | LVGLEAPSVREQPLPR-----       |  |
| SDR7C3 | P. troglodytes  | LVGLEAPSVREQPLPR-----       |  |
| SDR7C3 | M. musculus     | LVGLAMAHGSPGRGHAIPR-----    |  |
| SDR7C3 | X. tropicalis   | LVLHLEALTECKAL-----         |  |
| SDR7C3 | O. latipes      | LVGLQENGQHGSLLKKEGVSEP----- |  |
| SDR7C4 | H. sapiens      | MVGLLK-----                 |  |
| SDR7C4 | P. troglodytes  | MVGLLK-----                 |  |
| SDR7C4 | M. musculus     | MVGILK-----                 |  |
| SDR7C4 | M. domestica    | MVGILE-----                 |  |
| SDR7C4 | P. humilis      | MVGLLK-----                 |  |

|         |                  |                                                                       |
|---------|------------------|-----------------------------------------------------------------------|
| SDR7C4  | A. carolinensis  | MVGLLK-----                                                           |
| SDR7C4  | X. tropicalis    | MVGLIK-----                                                           |
| SDR7C4  | D. rerio         | MVGLRR-----                                                           |
| SDR7C5  | H. sapiens       | LAGLGPGEDAEPDEDPQSEDSEAPSSLSTPHPEEPTVSQPYPSPQSSPDLSKMTHRIQAKVEPEIQLS  |
| SDR7C5  | P. abelii        | LAGLGPGEDAEPDEDPQSEDSEAPFSLSTPHPEEPTVSQPYPSPQSSPDLSKMTHRIQAKVEPETQLS  |
| SDR7C5  | M. musculus      | LAGLAPGDDDDDPDEEPEPEDPRAPSSQSAPSPSEKTTVSGPSHSYQGSQDLSKLTQRRIQVKDEFTP- |
| SDR7C5  | M. domestica     | LAGLSKGGSQNTNPKPGSPRNPLAQIATSPALSRFRNLSFPLLSEGQRTVKDEFTP-----         |
| SDR7C5  | H. leucocephalus | LVGLGGPGENPSLAPAAVIQ-----                                             |
| SDR7C5  | G. japonicus     | LLGLAE-----                                                           |
| SDR7C5  | X. tropicalis    | MTGLAS-----                                                           |
| SDR7C5  | O. latipes       | MSGLA-----                                                            |
| SDR40C1 | H. sapiens       | LAQTFK-----                                                           |
| SDR40C1 | P. troglodytes   | LAQTFK-----                                                           |
| SDR40C1 | B. taurus        | LARRFK-----                                                           |
| SDR40C1 | G. gallus        | FSQKFKSTSPGSPQCH-----                                                 |
| SDR40C1 | A. carolinensis  | LSQQFKPQ-----                                                         |
| SDR40C1 | X. tropicalis    | LSQKFAPASCKL-----                                                     |
| SDR40C1 | O. latipes       | LALKFKP-----                                                          |

Figure S13. Alignment of the vertebrate SDR7C family and of SDR40C1 variants. \* and + symbols mark the structure consensus and the catalysis consensus respectively; the couples of amino acid symbols in red lowercase mark the splicing-site positions. Splicing sites are progressively numbered and the phase (p.) type is indicated after the splicing-site number. \* symbol marks the position of identical amino acid residues of the aligned SDR protein sequences.

|        |                     |                                                              |
|--------|---------------------|--------------------------------------------------------------|
| SDR9C1 | H. sapiens          | -----M-L-----ATRLSRPLSRLPG----KTLsACDRE-----                 |
| SDR9C1 | P. paniscus         | -----M-L-----ATRLSRPLSRLPG----KTLsACDRE-----                 |
| SDR9C1 | M. musculus         | -----M-L-----AARLSRPLSQLPG----KALSVRDRE-----                 |
| SDR9C1 | M. domestica        | -----M-L-----TARFSRSIVHLsr----NFLSFQ-----                    |
| SDR9C1 | C. livia            | -----M-L-----ATKLSRPLLNFAV----KALNFKDPG-----                 |
| SDR9C1 | C. picta            | -----MM-L-----ATRISRPLSLFSV----KTLNSRDIG-----                |
| SDR9C1 | X. tropicalis       | -----MAS-----CHLPVRACA-----                                  |
| SDR9C1 | D. rerio            | MAS-----LPM-V-RVALLVAFSVFLTLVLGFGLPsvLNWIARCCGFPE            |
| SDR9C2 | H. sapiens          | -MSTFFSDTAWICLA---VPTVLCGTVFCK-YKKS-S-----G-QLWSWMVCL-AGLC   |
| SDR9C2 | P. troglodytes      | -MSTFFSDTAWICLA---VPTVLCGTVFCK-YKKS-S-----G-QLWSWMVCL-AGLC   |
| SDR9C2 | M. musculus         | -MSPFASESawLCla---AAAVLGGTLLCG-CRSG-R-----QLRSQAVCLAGLWG     |
| SDR9C2 | M. domestica        | -----MNPFSWESRLLPLGVTVMlGAIALYK-FKKS-QSRTGS-SPVVLCHSVLL-CLWG |
| SDR9C2 | G. gallus           | MDALPSSPWGWLCVA---IPVLFGL---CL-AKRS-C-----RAHMLLRsvLP-ALFG   |
| SDR9C2 | A. mississippiensis | -----                                                        |
| SDR9C2 | X. tropicalis       | -MAHLDS-----RLLYLAVCVFFSGSALHK-IMKN-KVKIEN-ASV---SGLLSLLILG  |
| SDR9C2 | D. rerio            | -----MYTSGIVLYVSFIRSNKRPIAF-TSKWRSRGAV-----                  |
| SDR9C3 | H. sapiens          | -----MERWPWPSSGG---AWLLVAARALLQ-LLRS---DLRL-GRPLLAALAL-LAALD |
| SDR9C3 | P. troglodytes      | -----MERWPWPSSGG---AWLLVAARALLQ-LLRS---DLRL-GRPLLAALAL-LAALD |
| SDR9C3 | M. musculus         | -----MERWPWPSSGG---AWLLVAARALLQ-LLRS---DLRL-GRPLLAALAL-LAALD |
| SDR9C3 | C. picta            | -----MERWV--YGS---LWLVFAGSLLLR-LSRS---QLLL-TRALL-HLGL-LGLLQ  |
| SDR9C3 | X. tropicalis       | -MELAACPSLWAYGA---VWLSFLLLGFLR-FSNS---DMVL-SPALLLYVVV-LVLIE  |
| SDR9C3 | D. rerio            | --MEDFAVSFWIYIG---VMSIFVGAVKK-FLAF---NIGA-MPSVvVWLGA-TLLVE   |
| SDR9C4 | H. sapiens          | -----                                                        |
| SDR9C4 | P. troglodytes      | -----                                                        |
| SDR9C4 | M. musculus         | -----                                                        |
| SDR9C4 | M. domestica        | -----                                                        |
| SDR9C4 | G. gallus           | -----                                                        |
| SDR9C4 | C. mydas            | -----                                                        |
| SDR9C4 | X. tropicalis       | -----                                                        |
| SDR9C4 | D. rerio            | -----                                                        |
| SDR9C5 | H. sapiens          | -----                                                        |
| SDR9C5 | P. troglodytes      | -----                                                        |
| SDR9C5 | M. musculus         | -----                                                        |
| SDR9C5 | S. harrisii         | -----                                                        |
| SDR9C5 | G. gallus           | -----                                                        |
| SDR9C5 | A. carolinensis     | -----                                                        |
| SDR9C5 | X. tropicalis       | -----                                                        |
| SDR9C5 | D. rerio            | -----MYE                                                     |
| SDR9C6 | H. sapiens          | -----                                                        |
| SDR9C6 | P. paniscus         | -----                                                        |
| SDR9C6 | M. musculus         | -----                                                        |
| SDR9C6 | S. harrisii         | -----                                                        |
| SDR9C6 | X. tropicalis       | -----                                                        |
| SDR9C6 | A. carolinensis     | -----                                                        |
| SDR9C7 | H. sapiens          | -----                                                        |
| SDR9C7 | P. troglodytes      | -----                                                        |
| SDR9C7 | M. musculus         | -----                                                        |
| SDR9C7 | S. harrisii         | -----                                                        |
| SDR9C7 | X. tropicalis       | -----                                                        |
| SDR9C8 | H. sapiens          | -----                                                        |
| SDR9C8 | P. troglodytes      | -----                                                        |
| SDR9C8 | M. musculus         | -----                                                        |
| SDR9C8 | P. humilis          | -----                                                        |
| SDR9C8 | A. carolinensis     | -----                                                        |
| SDR9C8 | M. domestica        | -----                                                        |
| SDR9C8 | X. tropicalis       | -----                                                        |

|        |                     |                                                                                       |       |      |
|--------|---------------------|---------------------------------------------------------------------------------------|-------|------|
| SDR9C8 | P. reticulata       | -----                                                                                 |       |      |
|        |                     |                                                                                       | x x x |      |
| SDR9C1 | H. sapiens          | NGAr <b>r</b> PLLLGSTSFI----PI---GRRTYASAAE <b>p</b> vGSKAVLVTGCDSGFGFSLAKHLHS        | 1p.1  | 2p.0 |
| SDR9C1 | P. paniscus         | NGAr <b>r</b> PLLLGSTSFI----PI---GRRTYASAAE <b>p</b> vGSKAVLVTGCDSGFGFSLAKHLHS        | 1p.1  | 2p.0 |
| SDR9C1 | M. musculus         | NGT <b>r</b> hTLLFYPPASFS----PD---TRRTYASQAD <b>a</b> aSGKAILITGCDSGFGFSLAKHLHS       | 1p.1  | 2p.0 |
| SDR9C1 | M. domestica        | NIG <b>r</b> pGQELFDQPAT----PA---GQRSSSTQV <b>T</b> eiGNRAVLITGCDSGFGFTTAKDLHE        | 1p.1  | 2p.0 |
| SDR9C1 | C. livia            | NGF <b>r</b> pAERFCFPLLS----PH---GSRSYASEVD <b>q</b> iGSKAVLITGCDSGFGFALAKHLHD        | 1p.1  | 2p.0 |
| SDR9C1 | C. picta            | NGL <b>r</b> pVQGFCFPFLT----PS---GRRSYASEID <b>q</b> iGSKAVLITGCDSGFGFSLAKHLHS        | 1p.1  | 2p.0 |
| SDR9C1 | X. tropicalis       | NHF <b>r</b> fMPKWSFPLQS----AV---GKRPFASHT <b>a</b> ed-SKAVLVTGCDSGFGFSLAKHLHN        | 1p.1  | 2p.0 |
| SDR9C1 | D. rerio            | ASVTECIVFVYALFV---LYV---AVPRLPRGT <b>V</b> evEGKALLITGCDTGFGPALAKHFHK                 |       | 1p.0 |
| SDR9C2 | H. sapiens          | AVCLLILSPFWGLILFSVSCFLMY-TYLSGQELLPV <b>D</b> QKAVLV <b>t</b> gDCGLGHALCKYLDE         | 1p.2  |      |
| SDR9C2 | P. troglodytes      | AVCLLILSPFWGLVLFVSVCFLMY-TYLSGQELLPV <b>D</b> QKAVLV <b>t</b> gDCGLGHALCKYLDE         | 1p.2  |      |
| SDR9C2 | M. musculus         | GACLLSLSLCTLFLLSVACFLLLYMSSSD <b>Q</b> DL <b>P</b> VDQKAVLV <b>t</b> gADSGFGHGLAKHLDK | 1p.2  |      |
| SDR9C2 | M. domestica        | IYCFSSSIFIWGWTLFSLACCISL-SYSTSQEMLPLDKRAVL <b>t</b> gGDSGIGHALSKYLDE                  | 1p.2  |      |
| SDR9C2 | G. gallus           | LLCVAMLGTCWGLIVFCSTWLSCS-AYL-DAGPLPVGD <b>K</b> AVLV <b>t</b> gSDTGIGHALAKYLDN        | 1p.2  |      |
| SDR9C2 | A. mississippiensis | -----MLPVDNKAVLV <b>t</b> gSDSGIGHALAKHLDN                                            | 1p.2  |      |
| SDR9C2 | X. tropicalis       | IFCFFVLSDTAGLTLTLTACTIYYYS-IPVRDMLSAEGKSVLV <b>t</b> gCDSGFGHALAKHLDK                 | 1p.2  |      |
| SDR9C2 | D. rerio            | --AVELSIERRPLVILSSLTTLTYF-----RKIF---TLAGV <b>f</b> CDSGFGHELAQVLDR                   | 1p.2  |      |
| SDR9C3 | H. sapiens          | WLCQRLPPPAALAVLAAAGWIAL-SRLARPQRLPVATRAVL <b>t</b> gCDSGFGKETAKKLDS                   | 1p.2  |      |
| SDR9C3 | P. troglodytes      | WLCQRLPPPAALAVLAAAGWIAL-SRLARPQRLPVATRAVL <b>t</b> gCDSGFGKETAKKLDA                   | 1p.2  |      |
| SDR9C3 | M. musculus         | WLCQRLPPPAALVVLGAGWIAL-SRLARPPRLPVATRAVL <b>t</b> gCDTGFGKETAKKLDA                    | 1p.2  |      |
| SDR9C3 | C. picta            | YLCQACLPPLGA-ALTAAGCLAL-GRGAQGRRLPVVGKAVF <b>t</b> gCDSGFGKQAACHLDS                   | 1p.2  |      |
| SDR9C3 | X. tropicalis       | WLCHLYLPALGILFLSSACWYVL-GIVSPKRTLPEVGKVVF <b>t</b> gCDSGFGNVAAHKLDS                   | 1p.2  |      |
| SDR9C3 | D. rerio            | RLCALCMPAVLARLVLCVCCWLYF-TWATPKPSLPVEDKAVF <b>t</b> gCDSGFGNATAKKLDA                  | 1p.2  |      |
| SDR9C4 | H. sapiens          | -----MLFWVLGLLILCGFL--WTRKGKLIKIEDITDKYIFITGCDSGFGNLAARTFDK                           |       |      |
| SDR9C4 | P. troglodytes      | -----MLFWVLGLLILCGFL--WTRKGKLIKIEDITDKYIFITGCDSGFGNLAARTFDK                           |       |      |
| SDR9C4 | M. musculus         | -----MLFWLLALLFLCAFL--WNYKGQLKIADIADKYVFITGCDTGFGNLAARTFDK                            |       |      |
| SDR9C4 | M. domestica        | -----MILWMLAFLIICCFL--WNYKGHLRIADINNKYIFITGCDTGFGNLAARTFDK                            |       |      |
| SDR9C4 | G. gallus           | -----MFFYILLFLSISLLWYWKTRDGGKVANLNGKYIFITGCDTGFGNMAAKTFDK                             |       |      |
| SDR9C4 | C. mydas            | -----MFFHILIFLAIFYLWWRWRAQDGQKIRDLTDKYIFITGCDSGFGNLAARTFDK                            |       |      |
| SDR9C4 | X. tropicalis       | -----MLLCLFIGVAILYIWW--RVRDGLKINNITEKYIILITGCDTGFGNHAAKTFDK                           |       |      |
| SDR9C4 | D. rerio            | -----MYLYI-AGLVVLFYVY-RWFRELGRVSNKSEKFVYITGCDTGFGNLLARHLDT                            |       |      |
| SDR9C5 | H. sapiens          | -----MWLPL-LLGALLWAVL-WLLRDRQSLPA-SNAFVFITGCDSGFGRLLALQLDQ                            |       |      |
| SDR9C5 | P. troglodytes      | -----MWLPL-LLGALLWAVL-WLLRDRQSLPA-SDAFVFITGCDSGFGRLLALQLDQ                            |       |      |
| SDR9C5 | M. musculus         | -----MWLPL-LLGALLWAVL-WLLRDRQSLPA-SDAFIFITGCDSGFGRLLALQLDQ                            |       |      |
| SDR9C5 | S. harrisii         | -----MWLLL-LLGTLLWGVL-WFLRDRVLPP-SDAFVFITGCDSGFGRHLALRLDR                             |       |      |
| SDR9C5 | G. gallus           | -----MWLYL-LLVVLAWALG-WLVRDRQTLPSVKDKHVFITGCDSGFGNLLARRLAQ                            |       |      |
| SDR9C5 | A. carolinensis     | -----MWCCV-LLFSVLWTVV-WFFRDRQMLSSFKDKYVFVTGCDTGFGNLLAKRLDK                            |       |      |
| SDR9C5 | X. tropicalis       | -----MWCYV-LLFAMVWAIG-WLLRDRQKISRFSNKHVFITGCDTGFGNLLAKRLSR                            |       |      |
| SDR9C5 | D. rerio            | <b>FLsn</b> SCPSTYAL-GTFAILWVLV-WFYRDNLKITRVSEKHVFVTGCDSGFGNLLCKRLDK                  | 1p.1  |      |
| SDR9C6 | H. sapiens          | -----MWLYL-AAFVGLYYLL-HWYRERQVVSHLQDKYVFITGCDSGFGNLLARQLDA                            |       |      |
| SDR9C6 | P. paniscus         | -----MWLYL-AAFVGLYYLL-HWYRERQVVSHLQDKYIFITGCDSGFGNLLARQLDA                            |       |      |
| SDR9C6 | M. musculus         | -----MWLYL-VTLVGLYHLL-RWYRERQVVSHLQDKYVFITGCDSGFGNLLARQLDR                            |       |      |
| SDR9C6 | S. harrisii         | -----MWLYV-ASLIGLYYLF-RWYREKQVVSNLEDKYVFITGCDSGFGNQLAKQLDL                            |       |      |
| SDR9C6 | X. tropicalis       | -----MWLPLLVI-ITLMLLY-RWSRQRKKIQNLSDKYVFITGCDSGFGNVLAKQLDK                            |       |      |
| SDR9C6 | A. carolinensis     | -----MWIYL-VPVAILYFVI-RFYRERQTVENLGEKYVFITGCDSGFGNQVAKQLDI                            |       |      |
| SDR9C7 | H. sapiens          | -----MAALTDLSEFMY-RWFKNCNLVGNLSEKYVFITGCDSGFGNLLAKQLVD                                |       |      |
| SDR9C7 | P. troglodytes      | -----MAALTDLSEFMY-RWFKNCNLVGNLSEKYVFITGCDSGFGNLLAKQLVD                                |       |      |
| SDR9C7 | M. musculus         | -----MAALTDAFMY-RWFKNCNLVKNLSEKYVFITGCDSGFGNLLAKQLVD                                  |       |      |
| SDR9C7 | S. harrisii         | -----MGGIMDISFMY-RWFKNLNLVNLSDKYVFITGCDSGFGNLLARKLDQ                                  |       |      |
| SDR9C7 | X. tropicalis       | -----MWLLLLVVAAMIFLY-RWNIQRQILPNLTDKYVLITGCDSGFGKLLAKQLDG                             |       |      |
| SDR9C8 | H. sapiens          | -----MWLYL-AVFVGLYYLL-HWYRERQVLSHLRDKYVFITGCDSGFGKLLARQLDA                            |       |      |
| SDR9C8 | P. troglodytes      | -----MWLYL-AVFVGLYYLL-HWYRERQVLSHLRDKYVFITGCDSGFGKLLARQLDA                            |       |      |
| SDR9C8 | M. musculus         | -----MWLYL-VALVGLWTLL-RFFRVQVVSHLQDKYVFITGCDSGFGTLLARQLDR                             |       |      |
| SDR9C8 | M. domestica        | -----MWLYL-AVLVGLYFLF-RWLRERQVVSNLGDKYVFITGCDSGFGNLLAKQLDL                            |       |      |



|        |                 |                                                            |
|--------|-----------------|------------------------------------------------------------|
| SDR9C8 | P. humilis      | -----MWLYAVAVLLGLFLLR-RWHRERQTVPRLSEKHVLITGCDSGFGNLLARQLDA |
| SDR9C8 | A. carolinensis | -----MWLYL-AAFLGLYLLC-RWYREKQILSHLTEKYVFITGCDSGFGNLVARQLDA |
| SDR9C8 | X. tropicalis   | -----MWLFLLVL-LALILLY-RWNIGRKMLPNLTDKYVFITGCDSGFGNLLAKQLDR |
| SDR9C8 | P. reticulata   | -----MFLYI-LGLVAVWYLY-RWYKESERVPNKGDKYVYITGCDSGFGNSLAKHLDK |

\* \* \*

|        |                     |                                                                |      |      |
|--------|---------------------|----------------------------------------------------------------|------|------|
| SDR9C1 | H. sapiens          | KGFLVFAGCLMkdKGHDGVKELDSLNSDRLRTVQLNVCSSEEEVEKVVEIVRSSSLKDPEkg | 3p.2 | 4p.2 |
| SDR9C1 | P. paniscus         | KGFLVFAGCLMkdKGHDGVKELDSLNSDRLRTVQLNVCSSEEEVEKAVEIVRSSSLKDPEkg | 3p.2 | 4p.2 |
| SDR9C1 | M. musculus         | KGFLVFAGCLMkdKGDAGVKELDSLKSDRLRTIQLNVCNSEEVEKAVETIRSGLKDPEkg   | 3p.2 | 4p.2 |
| SDR9C1 | M. domestica        | LGFRVFAGCLFkdKGGKGVEELDSMKSERMQTIQLDVCQSAEVEKAVKTIQESLEDPEkg   | 3p.2 | 4p.2 |
| SDR9C1 | C. livia            | KGFIYAGCLQkdKGEGGSKDLDNMNSDRMRTLQLNVCDSSKEVDRAVEHVNRTLQDPEkg   | 3p.2 | 4p.2 |
| SDR9C1 | C. picta            | KGFIYAGCLFkdQGAAGSQELDNMKSERMRTIQLNVCDSSQEI ERAVEHMGASLKDPQkg  | 3p.2 | 4p.2 |
| SDR9C1 | X. tropicalis       | KGFIYAGCLFkdKGEAGVKELDSMKSDRMRTIQLNVVKQDEVDRTVEIIRENLTNPEkg    | 3p.2 | 4p.2 |
| SDR9C1 | D. rerio            | LGFTVFAGCLFkdG--EGAKELENIHSEKLKVQLDVCSEEQVSQAVQFVTENLPDSEkg    | 3p.0 | 4p.2 |
| SDR9C2 | H. sapiens          | LGFTVFAGVLNENG--PGAEELRRTCSPRLSVLQMDITKPVQIKDAYSKVAAMLQ--Drg   |      | 2p.2 |
| SDR9C2 | P. troglodytes      | LGFTVFAGVLNENG--PGAEELRRTCSPRLSVLQMDITKPVQIKDAYSKVAAMLQ--Drg   |      | 2p.2 |
| SDR9C2 | M. musculus         | LGFTVFAGVLDKEG--PGAEELRKHCSERLSVLQMDVTKPEQIKDAHSKVTEKIQ--Dkg   |      | 2p.2 |
| SDR9C2 | M. domestica        | LGFTVFAGVLNEKG--PGAEALKKTCRKRTSVFQMDITKPAQIREVQARVAEKVQ--Qtg   |      | 2p.2 |
| SDR9C2 | G. gallus           | LGFI VFAGVLNKDG--PGAEELRRTCSQRLSLLQLDITNPTQVKEAYLQVSEKVQ--Ktg  |      | 2p.2 |
| SDR9C2 | A. mississippiensis | LGFFVFAGVLNKEG--PGAEALKRSCSQRLSVLQMDITNPTQIREAYLAVSEKVQ--Nag   |      | 2p.2 |
| SDR9C2 | X. tropicalis       | LGVHVFAGVLDKKG--PGAEELKRVCSTHLCIQLNITNCEEIRKAYKEISSYIQ--Dag    |      | 2p.2 |
| SDR9C2 | D. rerio            | AGMRVFAGVLDLSS--PGALKKESASVNLTVLQDLITNNTQITQTHQFIKSQTG--Ktg    |      | 2p.2 |
| SDR9C3 | H. sapiens          | MGFTVLATVLELNS--PGAIELRTCCSPRLRLQLMDITKPGDISRVLEFTKAHTT--Stg   |      | 2p.2 |
| SDR9C3 | P. troglodytes      | MGFTVLATVLELNS--PGAIELRTCCSPRLRLQLMDITKPGDISRVLEFTKAHTT--Stg   |      | 2p.2 |
| SDR9C3 | M. musculus         | MGFTVLATVLDLNS--PGALELRDLCSPRLLQLMDITKAEDISRVLEITKAHTA--Stg    |      | 2p.2 |
| SDR9C3 | C. picta            | MGFKVFASVLDLQS--PGAEELRQRCSPSLTLLQMDITKPEDIRKAQQLVQPQTA--Rtg   |      | 2p.2 |
| SDR9C3 | X. tropicalis       | MGFKVIATVNLNES--PGARKLRKICSDNLTIIQMDITKQEDIQKAQQTTKLHTA--Grg   |      | 2p.2 |
| SDR9C3 | D. rerio            | MGFEVFATVNLLEG--EGAKHLRKVCSSRLTLLQVDITQPPQVQQAALLDTKAKLG--Ird  |      | 2p.2 |
| SDR9C4 | H. sapiens          | KGFHVIAACLTE----SGSTALKAETSERLRTVLLDVTDPENVKRTAQWVKNVQVG--Ekg  |      | 1p.2 |
| SDR9C4 | P. troglodytes      | KGFHVIAACLTE----SGSTALKAETSERLCTVLLDVTNPENVKRTAQWVKNVQVG--Ekg  |      | 1p.2 |
| SDR9C4 | M. musculus         | KGFRVIAACLTE----SGSAALKAKTSERLHTVLLDVTDPENVKRTAQWVKSHVG--Ekg   |      | 1p.2 |
| SDR9C4 | M. domestica        | KGFRVLAACLTE----SGCRDLKASTSGKLQTVLLDVTKPDNVKRTAQWVKDEVG--Eng   |      | 1p.2 |
| SDR9C4 | G. gallus           | KGFRVLASCLTE----TGAKELQAATSDQLQTVLLDVRDSNSVKKAAAWIKAKVQ--Seg   |      | 1p.2 |
| SDR9C4 | C. mydas            | KGFRVLASCLTE----AGAVELKAATSEQLQTVLLDVTDPDNVRKVAEWIKAEVG--Sag   |      | 1p.2 |
| SDR9C4 | X. tropicalis       | QGFRILATCLTE----AGATGLREATSQRLKTTLLDVTIAENVVSMAEWWKGEVG--Srg   |      | 1p.2 |
| SDR9C4 | D. rerio            | KGFRVIAGCYSE----KGEDELKKICSDRLITLHLDVTDNENVKKAETIKSLVG--Qkg    |      | 1p.2 |
| SDR9C5 | H. sapiens          | RGFRVLASCLTP----SGAEDLQRVASSRLHTTLLDITDPQSVQQAAKWVEMHVK--Eag   |      | 1p.2 |
| SDR9C5 | P. troglodytes      | RGFRVLASCLTP----SGAEDLQRVASSRLHTTLLDITDPQSVQQAAKWVEMHVK--Eag   |      | 1p.2 |
| SDR9C5 | M. musculus         | KGFQVLACGLTP----SGAEDLQQMSSRLHTTLLDITDPQNVQVQVAKWVKTRVG--Etg   |      | 1p.2 |
| SDR9C5 | S. harrisii         | RGFRVLASCLTP----TGAENLKQAASPRLCTTLLDVTDPQNIQQVAEWVGTIVG--Erg   |      | 1p.2 |
| SDR9C5 | G. gallus           | RGFRVLATCLTP----QGADGLQRCAGHLRTTLLDVTRSDSIRRAAEWVREEVG--Ekg    |      | 1p.2 |
| SDR9C5 | A. carolinensis     | KGFQVLACGLTQ----KGADNLQRSSSPNRLTLLDVTNSESIRKAVEWVKGEVG--Ekg    |      | 1p.2 |
| SDR9C5 | X. tropicalis       | KGFQVLACGLTQ----AGADDLQKACTPGLKCTLLDVTSESINKAVEWVKSEVG--Drg    |      | 1p.2 |
| SDR9C5 | D. rerio            | RGFRVLACGLTE----KGADDLKRAAGPFLKTCILDVTSSASIQKAMEWTKNEVG--Dkg   |      | 1p.2 |
| SDR9C6 | H. sapiens          | RGLRVLAACLTE----KGAEQLRGQTSDRLETVTLDVTKMESIAAATQWVKEHVG--Drg   |      | 1p.2 |
| SDR9C6 | P. paniscus         | RGLRVLAACLTE----KGAEQLRGQTSDRLETVTLDVTKMESIAAATQWVKEHVG--Drg   |      | 1p.2 |
| SDR9C6 | M. musculus         | RGMRVLAACLTE----KGAEELRNKTSDRLETVILDVTKTESIVAATQWVKERVG--Drg   |      | 1p.2 |
| SDR9C6 | S. harrisii         | RGLRVLAACLTE----KGAEQLRHQTSDRVKTIVILDVTKTESITAAQWVKECVG--Nkg   |      | 1p.2 |
| SDR9C6 | A. carolinensis     | QGLRVLAACLTP----EGAEELERLTSDRLKTTILDVSTESVKAASEWVKGIVG--Nkg    |      | 1p.2 |
| SDR9C6 | X. tropicalis       | QGIQVLATCLTE----KGAETLKSETSSRLRTVNMMVTDSDQSVKSAAEWVTGIVG--Dag  |      | 1p.2 |
| SDR9C7 | H. sapiens          | RGMQVLAACFTE----EGSQKLQRDTSYRLQTTLLDVTKSESIKAAAQWVRDKVG--Eqg   |      | 1p.2 |
| SDR9C7 | P. troglodytes      | RGMQVLAACFTE----EGSQKLQDQTSYRLQTTLLDVTKSESIKAAAQWVRDKVG--Eqg   |      | 1p.2 |
| SDR9C7 | M. musculus         | RGMKVLAACLTE----EGAQKLLQDTS HQLTFLLDVTKSENKAAQWVRDQVG--Eqg     |      | 1p.2 |
| SDR9C7 | S. harrisii         | RGMRVLATCFTE----EGAQELRRACSHRLQITFLDVTKTESIKAAAQWVNAQVG--Drg   |      | 1p.2 |
| SDR9C7 | X. tropicalis       | QGLKVLATCLTQ----KGAEELKKETSSRLKTVIMDVSDSESVSKAAQWVSIQIVG--Nag  |      | 1p.2 |
| SDR9C8 | H. sapiens          | RGLRVLAACLTE----KGAEQLRGQTSDRLETVTLDVTKTESVAAAAQWVKECVR--Dkg   |      | 1p.2 |

|        |                 |                                                               |      |
|--------|-----------------|---------------------------------------------------------------|------|
| SDR9C8 | P. troglodytes  | RGLRVLAACLTE----KGAEQLRGQTSDRLETVTILDVTKTESVAAAAQWVKECVR--Dkg | 1p.2 |
| SDR9C8 | M. musculus     | RGMRVLAACLTE----KGAEELRNKTSDRLETVILDVTKTESIVTATQWVKEHVG--Nrg  | 1p.2 |
| SDR9C8 | M. domestica    | RGLRVLAACLSE----EGAQLRRATSERVEVTILDVTKTESITAAQWVKERVG--Nkg    | 1p.2 |
| SDR9C8 | P. humilis      | RGLRVLAACLTD----SGAAQLRAATSDRLQTVLLDVTSSKSIADVTAWVRERVG--Dqg  | 1p.2 |
| SDR9C8 | A. carolinensis | RGLRVLAGCFTE----EGAKKLKEATSQRLQTIISLDVTKTESVQAQAAWAKGIVG--Dkg | 1p.2 |
| SDR9C8 | X. tropicalis   | RGLWVLAACLTD----KGAEELKKETSSRLKTVILNVDSQSVISASAWVSDIVG--Nkg   | 1p.2 |
| SDR9C8 | P. reticulata   | LGFCVIAGCYTE----NGETELKKVSSERLTAISLDVSKSESVKKVAFIKTLVG--Dkg   | 1p.2 |

\* \* \*

|        |                     |                                                                |      |
|--------|---------------------|----------------------------------------------------------------|------|
| SDR9C1 | H. sapiens          | MWGLVNNAGIST-FGEVEFTSLETYKQVAEVLNWGTVRMTKSFLPLIRRAkgRVVNISM    | 5p.2 |
| SDR9C1 | P. paniscus         | MWGLVNNAGIST-FGEVEFTSLETYKQVAEVLNWGTVRMTKSFLPLIRRAkgRVVNISM    | 5p.2 |
| SDR9C1 | M. musculus         | MWGLVNNAGIST-FGEVEFTSMETYKEVAEVLNWGTVRTTKSFLPLLRRAkgRVVNISM    | 5p.2 |
| SDR9C1 | M. domestica        | LWGLVNNAGIST-FGEVEFTSMETYKEVAEVLNWGTIRTTKACLPLIRRAkgRVVNISM    | 5p.2 |
| SDR9C1 | C. livia            | LWGLVNNAGIST-FGEVEFTSMDTYMEVAEVLNWGTVRTTKAFLPLIRRSkgRVVNISM    | 5p.2 |
| SDR9C1 | C. picta            | LWGLVNNAGIST-FGEVEFTSMETYKEVAEVLNWGTIRTTKAFPLIRRAkgRVVNISM     | 5p.2 |
| SDR9C1 | X. tropicalis       | LWGVVNNAGIST-FGEVEFTSMETYKEVAEVLNWGTVRVTKACLPLIRRAkgRVVNISM    | 5p.2 |
| SDR9C1 | D. rerio            | LWGVVNNAGIST-FGEVEFTTMDTYKQVSEVLNWGTIRVTKAFLPLIRRAkgRVVNIASM   | 5p.2 |
| SDR9C2 | H. sapiens          | LWAVINNAGVLGFPTDGEILLMTDYKQCMVNFPGTVEVTKTFLPLLRKSKGRLVNVSSM    |      |
| SDR9C2 | P. troglodytes      | LWAVINNAGVLGFPTDGEILLMTDYKQCMVNFPGTVEVTKTFLPLLRKSKGRLVNVSSM    |      |
| SDR9C2 | M. musculus         | LWAVVNNAGVFLHPIDGELIPMSIYRKCMAVNFPGTVEVTKAFLPLLRKSKGRLVNVSSM   |      |
| SDR9C2 | M. domestica        | LWAVVNNAGILGSLIGDGELLPMEVYRQCMDVNFFGAVEVTKAFMPLLRKSKGRVNVSSSL  |      |
| SDR9C2 | G. gallus           | LWGVVNNAGILGFPADGELTLMSTYKACMDVNFFGAVHVSKTFLPLLRKSRGRLVNMSSM   |      |
| SDR9C2 | A. mississippiensis | LWGIINNAGVLGFTADSELLPMSVYRQCMDVNFFGAVEVSKMFPLPLLRKSQGRVNMSSM   |      |
| SDR9C2 | X. tropicalis       | LWGIIVNAGVLGYVADGELIPFSVYRQCMVNFGLGAVQVTQIFAPLLRKSQGRLVSISSM   |      |
| SDR9C2 | D. rerio            | LWALVNNAGVLGYVCDGEILPMKMYKSCLDVNFLGSVMMHTFPLPLIRQSRGRVINITSM   |      |
| SDR9C3 | H. sapiens          | LWGLVNNAGHNEVVADAELSPVATFRSCMEVNFFGALELTGKGLPLLRSSRGRIVTVGSP   |      |
| SDR9C3 | P. troglodytes      | LWGLVNNAGHNEVVADAELSPVATFRSCMEVNFFGALELTGKGLPLLRSSRGRIVTVGSP   |      |
| SDR9C3 | M. musculus         | LWGLVNNAGLNIIVVADVELSPVATFRKCMEVNFFGALELTGKGLPLLRHSRGRIVTVGSP  |      |
| SDR9C3 | C. picta            | LWGLVNNAGFDDTIADAELSPCKFRCTCMDVNFFGTLELTAKALLPLLRSAARGRIVTVSSP |      |
| SDR9C3 | X. tropicalis       | LWALINNAGYCAHFGDDELTLMSITYKACMDVNFFGTLELTQALLPFIYAKGRIVTVGSP   |      |
| SDR9C3 | D. rerio            | LWGLVNNAGWCNIGDAELSLMSNYRGCMEVNFFGTVTVTRTFLPLLRQSKGRIVTISSP    |      |
| SDR9C4 | H. sapiens          | LWGLINNAGVPGVLAPTDLWTLEDYREPIEVNLFGLISVTLNMLPLVKKAQGRVINVSSV   |      |
| SDR9C4 | P. troglodytes      | LWGLINNAGVPGVLAPTDLWTLEDYREPIEVNLFGLISVTLNMLPLVKKAQGRVINVSSV   |      |
| SDR9C4 | M. musculus         | LWGLINNAGVLGVLAPTDLWTVDYREPIEVNLFGLINVTNLNMLPLVKKARGRIVNVSSI   |      |
| SDR9C4 | M. domestica        | LWGLINNAGILGVLAPTDLWLTVEHFREPFEVNLFGLINVTNLNMLPLVKKAQGRVINISSI |      |
| SDR9C4 | G. gallus           | LWGLVNNAGIMGPTAPTDLWDIEHFREPFEVNLFGLINVTNLNMLPLIKLAKGRIVNVSSI  |      |
| SDR9C4 | C. mydas            | LWGLVNNAGIMGPSAPTDLWNLIEHFRAPIETNLIGLINVTNLHLLPLVKKARGRLVNISST |      |
| SDR9C4 | X. tropicalis       | LWGLINNAGVMGTLPADFWDLTIEDIKKPEINLIGLIHVTLVLLPFIKKAKGRIVNVSSI   |      |
| SDR9C4 | D. rerio            | LWAVVNNAGIAFPTAPNDWLEIEDFTPMINVNLIGVIAVTLVPLIKKAKGRVVNVASV     |      |
| SDR9C5 | H. sapiens          | LFGLVNNAGVAGIIGPTPWLTRDDFQQRVLNVNTMGPIGVTLALLPLLQQARGRVINITSV  |      |
| SDR9C5 | P. troglodytes      | LFGLVNNAGVAGIIGPTPWLTRDDFQQRVLNVNTMGPIGVTLALLPLLQQARGRVINITSV  |      |
| SDR9C5 | M. musculus         | LFGLVNNAGVAGIIGPTPWLTDQDFQQRVLSVNTLGPIGVTLALLPLLQQARGRVNITSV   |      |
| SDR9C5 | S. harrisi          | LFGLVNNAGITGIIIGPTPWLNLIEDYRKVLEVNLTGPIGVTLALLPLLRQSRGRIINISSV |      |
| SDR9C5 | G. gallus           | LFGLVNNAGVANPIGPTEWMRIEDYRQVMVNTFGAIEVTLQLPLLKRARGRVNVTSSV     |      |
| SDR9C5 | A. carolinensis     | LFGLVNNAGVANPIGPTEWMIVEDYRKVMSINTFGMIEVSLAFLPLLQKARGRVNVTSSV   |      |
| SDR9C5 | X. tropicalis       | LYGLVNNAGIANPIGPTEWMTIQDYKRVMNVNAFGTIAVSLSFLSLIKKAGRIINMASI    |      |
| SDR9C5 | D. rerio            | LWGLVNNAGRSLPMGPSEWMMKIEDFESTLKVNMGTGVIETMTFLPLVKKARGRIVNVASV  |      |
| SDR9C6 | H. sapiens          | LWGLVNNAGILTPITLCEWLNTEDSMNMLKVNLIIGVIQVTLNMLPLVRRARGRIVNVSSI  |      |
| SDR9C6 | P. paniscus         | LWGLVNNAGILTPITLCEWLNTEDSMNMLKMNLIIGVIQVTLNMLPLVRRARGRIVNVSSI  |      |
| SDR9C6 | M. musculus         | LWGLVNNAGVLQPFAYIEWYRPEDYMPIFQVNLIGLTVQVTISMLFLVKKARGRIVNVSSA  |      |
| SDR9C6 | S. harrisi          | LWGLVNNAGIVLPHICPEMMTKIELTKTLNVNLIGLIEVTLNMLPMIRQARGRIVNVCSI   |      |
| SDR9C6 | A. carolinensis     | LWGLVNNAGILRTTCPNEWLTKEDEFKVLNVNLLGLIDVTLQMLPLLRKAKGRVVNVASI   |      |
| SDR9C6 | X. tropicalis       | LWGLVNNAGYGVFSPFGWQTEHFVVKLEINLLGMVDVTLNLLPLLRKAQGRIVNVSSN     |      |
| SDR9C7 | H. sapiens          | LWALVNNAGVGLPSGPNWLTKDQDFVKVINVNVLVGLIEVTLHMLPMVKRARGRVNMSSS   |      |
| SDR9C7 | P. troglodytes      | LWALVNNAGVGLPSGPNWLTKEDEFVKVINVNVLVGLIEVTLHMLPMVKRARGRVNMSSS   |      |
| SDR9C7 | M. musculus         | LWALVNNAGVGLPSGPNWLTIKDFVKVININVLVGLIDVTLNMLPMIKKARGRVNMSSS    |      |

|        |                 |                                    |                          |                        |                    |
|--------|-----------------|------------------------------------|--------------------------|------------------------|--------------------|
| SDR9C7 | S. harrisii     | LWGLVNNAGVGLPSGPNWLTKEDEFAKVINVNLI | GMI                      | EVTLNMLPMIKRARGRVNMSSS |                    |
| SDR9C7 | X. tropicalis   | LWGLVNNAGIALPIGPNWMMKEHFVKMIDVNLL  | GMDVDTLLPLIRRARGRIVNVSSS |                        |                    |
| SDR9C8 | H. sapiens      | LWGLVNNAGISLPTAPNELLTKQDFVTILDVNLL | GGVIDVTL                 | SLPLVRRARGRVNVSSV      |                    |
| SDR9C8 | P. troglodytes  | LWGLVNNAGISLPTAPNELLTKQDFMTILDVNLL | GGVIDVTL                 | SLPLVRRARGRVNVSSV      |                    |
| SDR9C8 | M. musculus     | LWGLVNNAGISLTPSGPNEWMKKQDFAHVL     | DVNLLGMI                 | EVTL                   | SMLPLVRKARGRVNVSSV |
| SDR9C8 | M. domestica    | LWGLVNNAGISMPTAPNDWLTKEDEFLRVINVN  | LIGLIEVTL                | SLSLVRKAKGRIVNVSSI     |                    |
| SDR9C8 | P. humilis      | LWGLVNNAGIAIPTGPNWLTKEDEFLRVINVN   | LIGLIEVTL                | SLPLVRRARGRVNVASV      |                    |
| SDR9C8 | A. carolinensis | LWGLVNNAGISIPTAPNEWLTKEDEFLRVINVN  | LIGLIEVTL                | SLPLVRRARGRVNVASV      |                    |
| SDR9C8 | X. tropicalis   | LWGLVNNAGISNPIAPNEWLSKEDYLKVLNVN   | LLGVIDITL                | KLPLIRKARGRIVNVASV     |                    |
| SDR9C8 | P. reticulata   | LWAVVNNAGVATPSGPTEWLTIDDYKSM       | LAVNNGVIDVTL             | SVLPLIKKARGRVNVASV     |                    |

\*\*\* \* \*

|        |                     |                                 |              |                           |                      |            |      |      |
|--------|---------------------|---------------------------------|--------------|---------------------------|----------------------|------------|------|------|
| SDR9C1 | H. sapiens          | LGRMANPARSPYCITKFGVEAFSDCLRYEMY | PLGVKVS      | VVEPGNFIAATSLY-SPESIQ     |                      |            |      |      |
| SDR9C1 | P. paniscus         | LGRMANPARSPYCITKFGVEAFSDCLRYEMY | PLGVKVS      | VVEPGNFIAATSLY-SPESIQ     |                      |            |      |      |
| SDR9C1 | M. domestica        | LGRMSSPSRSPYCITKFGVEAFSDCLRYEMY | PLGVRVCV     | VVEPGNFIAATSLY-SPERIRA    |                      |            |      |      |
| SDR9C1 | M. musculus         | LGRMANPARSPYCITKFGVEAFSDCLRYEMH | PLGVKVS      | VVEPGNFIAATSLY-SPERIQ     |                      |            |      |      |
| SDR9C1 | C. livia            | MGRMGSPARSPYCITKFGVEAFSDCLRYEM  | QPPQGV       | TSIVEPGNFIAATNLY-SPERIKA  |                      |            |      |      |
| SDR9C1 | C. picta            | MGRMGSPARSSYCITKFGVEAFSDCLRYEM  | QPPQEV       | KICVVEPGNFIGATNLY-TPERIKA |                      |            |      |      |
| SDR9C1 | X. tropicalis       | LGRMANPARSPYCITKFGVEAFSDCLRYEMH | PLGVKVS      | VVEPGNFIAATSLY-SPEKIK     |                      |            |      |      |
| SDR9C1 | D. rerio            | YGRMGNALRSPYCISKYGEAFSDCLRYEMK  | TWGVKVS      | IIIEPGNFIVATGIL-TRDIVTT   |                      |            |      |      |
| SDR9C2 | H. sapiens          | ggGAPMERLASYGSSKA               | AAVTMFSSVMRL | ELSKWGIKVASIQPGGFL--tn    | IAGTS                | SDKWEK     | 3p.2 | 4p.2 |
| SDR9C2 | P. troglodytes      | ggGAPMERLASYGSSKA               | AAVTMFSSVMRL | ELSKWGIKVASIQPGGFL--tn    | IAGTS                | SDKWEK     | 3p.2 | 4p.2 |
| SDR9C2 | M. musculus         | ggTVPLQMTSAYAATKA               | ALTMFSTII    | RQELDKWGVKVV              | TIKPGGFK--tn         | ITGSQDIWDK | 3p.2 | 4p.2 |
| SDR9C2 | M. domestica        | agAMPKFLAAYCASKA                | ALTMFSAVMRME | LEKWKIKVVI                | IHPAGFK--tf          | IFGTKETLGM | 3p.2 | 4p.2 |
| SDR9C2 | G. gallus           | tgGIPLPYAAYGASKA                | ALSMFSGVMRQ  | ELSKWGIKVA                | IAIHPSGFR--tg        | IQGTPELWVK | 3p.2 | 4p.2 |
| SDR9C2 | A. mississippiensis | agGVMPRLSAYGASKA                | ALSMFSGVMRQ  | ELSKWGIKVA                | VVHPSGFR--tc         | IQGTPELWDK | 3p.2 | 4p.2 |
| SDR9C2 | X. tropicalis       | ggHVPLNGFAAYASSKA               | ALSMFSAVMRQ  | ELSKWGVKVA                | VVCPSGFR--tn         | IFGSQ----  | 3p.2 | 4p.2 |
| SDR9C2 | D. rerio            | agEVPLVGFAYGASKA                | ALNIYSGAIRQ  | ELSRWGVRI                 | IVQPGAFR--tn         | ILGSSEQWER | 3p.2 | 4p.2 |
| SDR9C3 | H. sapiens          | agDMPYPCLGAYGT                  | SKAAVALLMDTF | SCCELLPWGVKVS             | IIQPGCFK--te         | SVRNVGQWEK | 3p.2 | 4p.2 |
| SDR9C3 | P. troglodytes      | agDMPYPCLGAYGT                  | SKAAVALLMDTF | SCCELLPWGVKVS             | IIQPGCFK--te         | SVRNVGQWEK | 3p.2 | 4p.2 |
| SDR9C3 | M. musculus         | agDMPYPCLAAYG                   | TSKAAIALMDTF | GCCELLPWGIKVS             | IIKPGCFK--td         | AVTNVNLWEK | 3p.2 | 4p.2 |
| SDR9C3 | C. picta            | agDMPYPCLAAYG                   | SKAALTLMDTF  | RSELEPWGVKVS              | VILPGYFK--tg         | TSCDPAYWHE | 3p.2 | 4p.2 |
| SDR9C3 | X. tropicalis       | agEHSFPYLAAYGSSKA               | ALNRVMDIFR   | HELMPGVKVI                | LILPASFK--tg         | AHDNHIHWEN | 3p.2 | 4p.2 |
| SDR9C3 | D. rerio            | sgEHPFPCLASYGASKA               | ALNLFINTLR   | HELDPWGVKVS               | TILPSAYK--tg         | QSSNAEYWEK | 3p.2 | 4p.2 |
| SDR9C4 | H. sapiens          | GGRLAI-VGGGYTPSKY               | AVEGFNDSLrr  | DMKAFGVHVSCI              | EPGLFK--TNLA-DPVK    | VIE        | 2p.1 |      |
| SDR9C4 | P. troglodytes      | GGRLAI-VGGGYTPSKY               | AVEGFNDSLrr  | DMKAFGVHVSCI              | EPGLFK--TNLA-DPVK    | VIE        | 2p.1 |      |
| SDR9C4 | M. musculus         | GGRLAF-GGGGYTPSKY               | AVEGFNDSLrr  | DMKAFGVHVSCI              | EPGLFK--TELA-DPIK    | TTE        | 2p.1 |      |
| SDR9C4 | M. domestica        | GGRLAF-SGGGYTPSKY               | AVEGFNDSLrr  | DMKEFGVKVSCI              | EPGLFK--TGLS-DPVK    | AI         | 2p.1 |      |
| SDR9C4 | G. gallus           | GGRLAF-CGGGYCPSK                | FGVEGFNDSLrr | DMKAFGVKVS                | CIQPLFK--TPLT-DLAK   | ILK        | 2p.1 |      |
| SDR9C4 | C. mydas            | GGRLAV-WGGGYVPSK                | FGVEGFNDSLrr | DMKAFGVKVS                | CIQPLFK--TGLS-NRKK   | VIE        | 2p.1 |      |
| SDR9C4 | X. tropicalis       | GGRVAA-SGGAYFSSK                | FGVEGFNDSLrr | DMKAFGVQVSCI              | EPGLFK--TPLS-DPKK    | VLQ        | 2p.1 |      |
| SDR9C4 | D. rerio            | FGRIST-LGGAYCITK                | YGEAFNDALrr  | QMAPFGVKVLC               | IEPGFFK--TIVT-DFN    | IVES       | 2p.1 |      |
| SDR9C5 | H. sapiens          | LGRLAA-NGGGYCVSK                | FGLEAFSDSLrr | DVAHFGIRVS                | IIEPGFFR--TPVT-NLES  | LEK        | 2p.1 |      |
| SDR9C5 | P. troglodytes      | LGRLAA-NGGGYCVSK                | FGLEAFSDSLrr | DVAHFGIRVS                | IIEPGFFR--TPVT-NLES  | LEK        | 2p.1 |      |
| SDR9C5 | M. musculus         | LGRIAA-NGGGYCVSK                | FGLEAFSDSLrr | DMAFPGVQVS                | IIEPGFFR--TPVT-NLES  | LES        | 2p.1 |      |
| SDR9C5 | S. harrisii         | LGRLAA-NGGGYCVSK                | YGEAFSDSLrr  | DIAHFGVRVS                | IIEPGFFR--TAAT-DLES  | VEG        | 2p.1 |      |
| SDR9C5 | G. gallus           | LGRLSA-NGGGYCVSK                | YGEAFSDSLrr  | DMYHFGVKVS                | IIEPGFFK--TAVT-NLES  | IEA        | 2p.1 |      |
| SDR9C5 | A. carolinensis     | LGRLSA-NGGGYCISK                | YGEAFSDSLrr  | DMYHFGVKVS                | IIEPGFFK--TAVT-NLDS  | SIES       | 2p.1 |      |
| SDR9C5 | X. tropicalis       | LGRISA-NGGGYCVSK                | YGEAFSDSLrr  | DMQHFGVRVC                | IIIEPGFFK--TAVT-NLDS | IER        | 2p.1 |      |
| SDR9C5 | D. rerio            | LGRVAA-NGGGYCISK                | FAVESDCLrr   | DIQFGVNVC                 | IIIEPGFFK--TQVT-SLE  | PIER       | 2p.1 |      |
| SDR9C6 | H. sapiens          | LGRVAF-FVGGYCVSK                | YGEAFSDILrr  | EIQHFGVKIS                | IIEPGYFR--TGMT-NMTQ  | SLE        | 2p.1 |      |
| SDR9C6 | P. paniscus         | LGRVAF-FVGGYCVSK                | YGEAFSDILrr  | EIQHFGVKIS                | IIEPGYFR--TGMT-NMTQ  | SLE        | 2p.1 |      |
| SDR9C6 | M. musculus         | LGRVAL-FGGFYSCSK                | YGEAFSDVLrh  | EVQDFGVKVS                | IIIEPGSFK--TEMT-DAEL | TIE        | 2p.1 |      |
| SDR9C6 | S. harrisii         | LGRMAA-FSTAYCSSK                | FGVEAFSDCLr  | LEMQYFGVKVC               | IIIEPGYFK--TNLT-NEET | FVE        | 2p.1 |      |
| SDR9C6 | A. carolinensis     | LGRLSF-YGGGYCPSK                | YGEAFSDSLrr  | ELSPFGVKVS                | IIEPGYFK--TPMT-NVQD  | TLN        | 2p.1 |      |

|        |                 |                                                                |      |
|--------|-----------------|----------------------------------------------------------------|------|
| SDR9C6 | X. tropicalis   | AGRLAF-IGGGYCLSKFGVEAFSDSLrrELLDGFIKVSIIIEPGAFR--TGMG-VSGPHLQ  | 2p.1 |
| SDR9C7 | H. sapiens      | GGRVAV-IGGGYCVSKFGVEAFSDSIrrELYFVGKVCIIIEPGNYR--TAIL-GKENLES   | 2p.1 |
| SDR9C7 | P. troglodytes  | GGRVAV-IGGGYCVSKFGVEAFSDSIrrELYFVGKVCIIIEPGNYR--TAIL-GKENLES   | 2p.1 |
| SDR9C7 | M. musculus     | GGRVAI-FGGGYCVSKFGVEAFSDSIrrELHFFGVKVSIIIEPGNYK--TSIL-GQEALLES | 2p.1 |
| SDR9C7 | S. harrisi      | GGRVAV-IGGGYCVSKFGVEAFSDSIrrELYFVGKVCIIIEPGNYR--TAIL-GTEDIQ    | 2p.1 |
| SDR9C7 | X. tropicalis   | MGRIAL-FGGAYSISKHGVEAFSDCLrrELSRFGIKVSIIIEPGGFK--TSIF-SFSVCKK  | 2p.1 |
| SDR9C8 | H. sapiens      | MGRVSL-FGGGYCISKYGEAFSDSLrrELSYFGVKVAMIEPGYFK--TAVT-SKERFLK    | 2p.1 |
| SDR9C8 | P. troglodytes  | MGRVSL-FGGGYCISKYGEAFSDSLrrELSYFGVKVAMIEPGYFK--TAVT-SKERFLK    | 2p.1 |
| SDR9C8 | M. musculus     | MGRVSL-FGGGYCISKYGEAFSDSLrrELSYFGVKVAIEPGFFL--TGVV-SSARLCS     | 2p.1 |
| SDR9C8 | M. domestica    | MGRLSL-FGGGYCISKYGEAFSDSLrrELYHSGVRIAMIEPGFFK--TNIT-NLELFKE    | 2p.1 |
| SDR9C8 | P. humilis      | MGRVSF-FGGGYCISKYGEAFSDSLrlEMNKFGVKVCVIEPGYFK--TMIT-NTDNLEK    | 2p.1 |
| SDR9C8 | A. carolinensis | MGRVSF-FGGGYCPSKYGEAFSDSLrlELARFGVKVCIIIEPGYFQ--TAVT-NEKLLVD   | 2p.1 |
| SDR9C8 | X. tropicalis   | AGRVSL-CGGGYCISKYGVESFSDSLrrEMAQFGIKVSIVEPGYFK--TPVA-DANTQKK   | 2p.1 |
| SDR9C8 | P. reticulata   | FGRISP-FGGPYCVSKYGVESFSDSLrlNMAPFGVKVLCIEPGFFK--TSVT-DTVMLEK   | 2p.1 |

\* \* \* \* \*

|        |                     |                                                                 |      |
|--------|---------------------|-----------------------------------------------------------------|------|
| SDR9C1 | H. sapiens          | IAKKMWEELPEVVRKDYGKKYFDEKIAKMET-YCSSGSTDTSPVIDAVTHALTATTPYTR    |      |
| SDR9C1 | P. paniscus         | IAKKMWDELPEVVRKDYGKKYFDEKIAKMET-YCSSGSTDTSPVIDAVTHALTATTPYTR    |      |
| SDR9C1 | M. musculus         | IAKKMWDDLPEVVRKDYGRKYFDEKIAKMET-YCNSGSTDTSSVINAVTHALTAATPYTR    |      |
| SDR9C1 | M. domestica        | IANKMWNELPEVVRQDYGREYFEESVSKMER-YCTSGSTDTSAVIRAVRHALTSARPHTR    |      |
| SDR9C1 | C. livia            | IADKMWDELPEIVRKDYGRKYFDEQVSKMET-YCNSGSTDTSPVIESVAHALMSTTPYTR    |      |
| SDR9C1 | C. picta            | IAEKMWKELPEIVRKDYGRKYFDEQITKMES-YCNSGSPDTSPVINSITHALTSSSPYAR    |      |
| SDR9C1 | X. tropicalis       | IGDKMWADLPEVIKNDYGKKYFDEKIAMNT-YCNSGSTDTSEVIDAITHALTASTPYTR     |      |
| SDR9C1 | D. rerio            | TAEKLWKEAPPVQEDYGKAHFEQYMAIMRS-YCNSGQREIEPVLDDITDAIMSQRPYTR     |      |
| SDR9C2 | H. sapiens          | LEKDILDHLPAEVQEDYGQDYILAQRNLLL-INSKASKDFSPVLRDIQHAILAKSPFAY     |      |
| SDR9C2 | P. troglodytes      | LEKDILDHLPAEVQEDYGQDYILAQRNLLL-INSKASKDFSPVLRDIQHAILAKSPFAY     |      |
| SDR9C2 | M. musculus         | MEKEILDHFSKDIQENYGQDYVHTQKLIPT-LKERSNPDIPTVLRDIQHAILAKSPFAY     |      |
| SDR9C2 | M. domestica        | QEKNILDNISPDVLEAYGQDYIHSSIWPFLLQ-TSEKCTTDFSPIFTDILNGILCKNPSFL   |      |
| SDR9C2 | G. gallus           | QEKELVEHLSVDVQDYGQDYGRDYLLGLKSYLLR-IPSCCDADLTPVLSSILHALLSKRPHGL |      |
| SDR9C2 | A. mississippiensis | QEKHLMENLMPDVKTQDYGQDYILALKNFLLH-MPSSCSDLSPLDDVLDALLAKSPHGL     |      |
| SDR9C2 | X. tropicalis       | -NQVILDNVMPDVKEDYGEDYIENLKGLYHT-LHKFGSSDLSVPMEDACHALLAQTPNFL    |      |
| SDR9C2 | D. rerio            | AQEQLSGLSEEVKDSYGEEYIHSMQKRLLD-MSSASSEDKGFLLQSLKHALSSNPKHF      |      |
| SDR9C3 | H. sapiens          | RKQLLLANLPQELLQAYGKDYIEHLHGQFLH-SLRLAMSDLTTPVVDAITDALLAARPRR    |      |
| SDR9C3 | P. troglodytes      | RKQLLLANLPQELLQAYGKDYIEHLHGQFLH-SLRLAMSDLTTPVVDAITDALLAARPRR    |      |
| SDR9C3 | M. musculus         | RKQLLLANIPRELLQAYGEDYIEHVHGQFLN-SLRMALPDLSPVVDAITDALLAARPRR     |      |
| SDR9C3 | C. picta            | KKEQLLASLPADLLQAYGEEYIHEINKQFVK-FMKTANEDLSSVNSITDALIAASPAAR     |      |
| SDR9C3 | X. tropicalis       | QHKKLLANLPQELLQAYGEEYITETQNRFLK-YGDTACSDFSPVIDSITDAIISENPKVK    |      |
| SDR9C3 | D. rerio            | QYKSLQLGLSPNLEEYGEYILETKELFQN-YAKTANEDLSPVIDTIVEALLSPQPQVR      |      |
| SDR9C4 | H. sapiens          | KKLAIWEQLSPDIKQYGEYIEksLDK-LKGNKSYVNMDLSPVVECMDHALTSLFPKTH      | 3p.2 |
| SDR9C4 | P. troglodytes      | KKLAIWEQLSPDIKQYGEYIEksLDK-LKGNKSYVNMDLSPVVECMDHALTSLFPKTH      | 3p.2 |
| SDR9C4 | M. musculus         | KKLAIWKHLSPDIKQYGEYIEksLHR-LKSNSTSSVNLDLSLVVGCMHALTSLFPKTR      | 3p.2 |
| SDR9C4 | M. domestica        | KKMAVWNQLSSDIKQYGDGYIEksLAK-KAKNKPFQNMDSLIVVNCMDHALTSLFQTH      | 3p.2 |
| SDR9C4 | G. gallus           | EKEVIWNRLPPDTPKQYGEYFQkaa-KKEKFSKACLNITDI SLVVECMHALTSLHPRAH    | 3p.2 |
| SDR9C4 | C. mydas            | EREAIWNQLPPAIRKQYGEYIQkdaARKEKLTQRLQNTNLSLVVQCMHALTSINPRSR      | 3p.2 |
| SDR9C4 | X. tropicalis       | QRTDIWKRLPTEIQKEYGDNYIQidASKKQKLNQRIINTDLSLVVQCMHALTSRHPRTR     | 3p.2 |
| SDR9C4 | D. rerio            | TLHRLWNKLPQEVKDEYGSDDYVDktKLTAKEELLEKLADGDLMKVVCMEHAVAAPHPRTR   | 3p.2 |
| SDR9C5 | H. sapiens          | TLQACWARLPATQAHYGGAFLTKyLKMQRIMNLICDPDLTKVSRCLEHALTARHPRTR      | 3p.2 |
| SDR9C5 | P. troglodytes      | TLQACWARLPATQAHYGGAFLTKyLKMQRIMNLICDPDLTKVSRCLEHALTARHPRTR      | 3p.2 |
| SDR9C5 | M. musculus         | TLKACWARLPATQAHYGGAFLDtyLRVQRRIMNLICDPDLTKVTSLEHALTARHPRTR      | 3p.2 |
| SDR9C5 | S. harrisi          | ILQASWNRLSPATRYGENFSLkyLQAQRLIINLICDGLGKVSGLCEHALTARYPRTR       | 3p.2 |
| SDR9C5 | G. gallus           | SLRQLWERLAPETRLSYGGEFFHkyLRVQRFIMNIICDADLKVTRCMEHALGACHPRTR     | 3p.2 |
| SDR9C5 | A. carolinensis     | SLRQIWMRMRPEARQSYGEDFFSnyLKVQKFIMNLICDPDLKVTNCMEHALEAKHPRTR     | 3p.2 |
| SDR9C5 | X. tropicalis       | SLQQLWDQMPPETKMTYGDYFQqyLKVQRLIMNFICDADISKVPKIEHALQARYPRTR      | 3p.2 |
| SDR9C5 | D. rerio            | ELHRLWNQLTPVEKESYGDKYLDkyIWIQRLIMNAICDSDLKVTNCMEHALAVHPRTR      | 3p.2 |
| SDR9C6 | H. sapiens          | RMKQSWKEAPKHIKETYGQYFDalySIMKEGL-LNCSTNLNLVTDCEHALTSVHPRTR      | 3p.2 |
| SDR9C6 | P. paniscus         | RMKQSWKEAPKHIKETYGQYFDalySIMKEGL-LNCSTNLNLVTDCEHALTSVHPRTR      | 3p.2 |

|        |                 |                                                                |      |
|--------|-----------------|----------------------------------------------------------------|------|
| SDR9C6 | M. musculus     | RTKKVWEAAPEHIKESYGQQFFDdfCSTTKREL-MKCSRNLSLVTDCEMEHALTSTHPRTR  | 3p.2 |
| SDR9C6 | S. harrisii     | NFKKSWNDCSVEIKESYGQEFFEkLtnFIKVM-KRCCRNlNLVTDCEMEHALTCSYPRYR   | 3p.2 |
| SDR9C6 | A. carolinensis | YLENHWISVTQETKDSYGQTYFTn1LYKLLREDLTSRCNTNLFLVTDCEMEHALTSKHPRTR | 3p.2 |
| SDR9C6 | X. tropicalis   | FLEQLWNNLDPETKKSYGKEYYqyFQNVAC-LTSMTSPKLHKVTDCEMEHALTAVHPWTR   | 3p.2 |
| SDR9C7 | H. sapiens      | RMRKLWERLPQETRDSYGEDYFRiYTDKLKN-IMQVAEPRVRDVINSMEHAIVSRSPRIR   | 3p.2 |
| SDR9C7 | P. troglodytes  | RMRKLWERLPQETRDSYGEDYFRiYTDKLKN-IMQVAEPRVRDVINSMEHAIVSRSPRIR   | 3p.2 |
| SDR9C7 | M. musculus     | RMKKLWDRLPQETRDSYGEEYFQTyTKKLNV-LMRSAPRISDVNTSMEHAIVSRSPRIR    | 3p.2 |
| SDR9C7 | S. harrisii     | RMRYLWERLPQETRNSYGQYYlYTKNLKN-ITRLAEPKISEVTDCEMEHALTSRNPRIR    | 3p.2 |
| SDR9C7 | X. tropicalis   | SMEQLWADTSAETKECYGQYYLNetLQTIDE-LINTNSSKLCKVTNCMEHALTACHPWTR   | 3p.2 |
| SDR9C8 | H. sapiens      | SFLEIWRSSPEVKEAYGEKFVAdyKKSAAEQ-MEQKCTQDLSLVNTNCMEHALIACHPRTR  | 3p.2 |
| SDR9C8 | P. troglodytes  | SFLEIWRSSPEVKEAYGEKFVAdyKKSAAEQ-MEQKCTQDLSLVNTNCMEHALIACHPRTR  | 3p.2 |
| SDR9C8 | M. musculus     | NTQMLWDQTSSEIREIYGKEYLAsYLKRLNK-LDKRCNKDLSGVTDCMEHALTACHPRTR   | 3p.2 |
| SDR9C8 | M. domestica    | NFQSLWEQLDPPEVRQHYGQKFdaYMRSTVD-MQALCKEDLSLVNTNCMEHALTSRHRPSR  | 3p.2 |
| SDR9C8 | P. humilis      | NFHSIWNLPEEIKASYGENYLRr1VSTLKV-LEKTYNTDLSLVNTNCMEHALTSLHPRYR   | 3p.2 |
| SDR9C8 | A. carolinensis | TFTRLWDRLPDEIKHAYGERYFgmKKGTAE-MQAHCPDLSLVNTNCMEHALTAVYPRKR    | 3p.2 |
| SDR9C8 | X. tropicalys   | FLNEIWAKLPQHIRETYGQYEFkyCnNVER-NLEKVSSKLHLVTDCEMEHALTAVYPRTR   | 3p.2 |
| SDR9C8 | P. reticulata   | HFRSLWDRLPQDLKDDYGYAFLEtgleQLDERFKQFRDNDLMKVVHCMEHAIASVHPRYR   | 3p.2 |

\*\*\*

\*

|        |                     |                                                              |  |
|--------|---------------------|--------------------------------------------------------------|--|
| SDR9C1 | H. sapiens          | YHPMD--YYWWLRMQIMTHLPGAISDMIYIR-----                         |  |
| SDR9C1 | P. paniscus         | YHPMD--YYWWLRMQIMTHLPGAISDMIYIR-----                         |  |
| SDR9C1 | M. musculus         | YHPMD--YYWWLRMQIMTHFPGAISDKIYIH-----                         |  |
| SDR9C1 | M. domestica        | YHPMD--YYWWLRMQIMTHTPAAVSDMLYIH-----                         |  |
| SDR9C1 | C. livia            | YHPMD--YYWWLRMQIMTHMPAAISDRLYVY-----                         |  |
| SDR9C1 | C. picta            | YHPMD--YYWWLRVQIMTHLPAAVADRIYIY-----                         |  |
| SDR9C1 | X. tropicalis       | YHPMD--YYWWLRMQIMTHMPGAISDKIYIH-----                         |  |
| SDR9C1 | D. rerio            | YSPME--PHWWIRIQIMTHLPGAISDRLYF-----                          |  |
| SDR9C2 | H. sapiens          | YTPGKGAYLWICL---AHYLPIGIYDYFAKRHFQGD-KPMPRALRMPNYKKKAT-----  |  |
| SDR9C2 | P. troglodytes      | YTPGKGAYLWICL---AHYLPIGIYDYFAKRHFQGD-KPMPRALRMPNYKKKAT-----  |  |
| SDR9C2 | M. musculus         | YYPGRMAYLWVCL---AAYCPTSLLDYVIKKGFYP--QPTPRALRTVH-----        |  |
| SDR9C2 | M. domestica        | YTAGMFSYLCHCL---IFYFPVSVDYASKKMFFT--KTLPKALT-----            |  |
| SDR9C2 | G. gallus           | YTPGKGAYMMLCI---FCYFPLWFYDFLVSKSLGL--ESIPQALRTSEAENKDL-----  |  |
| SDR9C2 | A. mississippiensis | YTPGKNAYLALCI---FCYFPLWFYDFFIGKSLCV--KILPRALRGPDSKSKNT-----  |  |
| SDR9C2 | X. tropicalis       | YTPGRLAYLIPCL---YYFPQWISDWMGMQAFQISRNMPLRALRNNKSI-----       |  |
| SDR9C2 | D. rerio            | YYPGAGAWVLSLL---YRYCPTALSDKIFSGMFMMSGVQPAELARAIPH-----       |  |
| SDR9C3 | H. sapiens          | YYPGQGLGLMYFI---HYLYPEGLRRRFLQAFFI-S-HCLPRALQPGQPGTTPPQDAAQD |  |
| SDR9C3 | P. troglodytes      | YYPGQGLGLMYFI---HYLYPEGLRRRFLQAFFI-S-HCLPRALQPGQPGTTPPQDAAQD |  |
| SDR9C3 | M. musculus         | YYPGRGLGLMYFI---HHYLPEGLRRRCFLQNFFI-N-HLLPRALRPGQHGPAPA----- |  |
| SDR9C3 | C. picta            | YYPGVGMWLIYFI---HHYLPSIIRDLFKKAFFI-N-QKLPRALQPKQQNGLKHE----- |  |
| SDR9C3 | X. tropicalis       | YYAGKNLWILYLI---GIYLPHSVSDNFCKCLFLKN-NVLPRSLRKQKTNE-----     |  |
| SDR9C3 | D. rerio            | YYAGPGLILMYFI---CSYLPLSISDRFLQKLFVQK-KVMPRALIKQQGLSPNDNNNSIK |  |
| SDR9C4 | H. sapiens          | YAAGKDAKIFWIP---LSHMPAALQDFLLLKQKAELAN----PKAV-----          |  |
| SDR9C4 | P. troglodytes      | YAAGKDAKIFWIP---LSHMPAALQDFLLLKQKAELAN----PKAV-----          |  |
| SDR9C4 | M. musculus         | YIAGKDAKTFWIP---LSHMPAVLQDFLLLKQKVELAN----PKAV-----          |  |
| SDR9C4 | M. domestica        | YIAGVDAKTFWIP---LSLMPAILQDFLLQKHKVKLAD----PKAV-----          |  |
| SDR9C4 | G. gallus           | YVVGQDAKFWFTP---LSRMPADVQDFLLLGNNREKPAV----SHRK-----         |  |
| SDR9C4 | C. mydas            | YSAGWDAKLLWIP---LSSMPAALQDFVLLRNKAELAD----PTAG-----          |  |
| SDR9C4 | X. tropicalis       | YSAGSDAAFLWIP---LSYMPFTFIQDFVILRNKVKIPT----SGNTVH-----       |  |
| SDR9C4 | D. rerio            | YSPGWDAKFFWLFP---LSYMPFTFISDALLLKAVQPKA----SIL-----          |  |
| SDR9C5 | H. sapiens          | YSPGWDAKLLWLP---ASYLPASLVDAVLTWVLPKPAQ----AVY-----           |  |
| SDR9C5 | P. troglodytes      | YSPGWDAKLLWLP---ASYLPASLVDAVLTWVLPKPAQ----AVY-----           |  |
| SDR9C5 | M. musculus         | YSPGWDAKLLWLP---ASYLPARVVDVLTWILPRPAQ----SVS-----            |  |
| SDR9C5 | S. harrisii         | YSPGWDAKLLWLP---ASYLPASLVDAILTFLVLPKPAQ----TVC-----          |  |
| SDR9C5 | G. gallus           | YSAGWDAKLLWLP---ASYLPACIVDFVLATILPKPAH----HVR-----           |  |
| SDR9C5 | A. carolinensis     | YSAGWDAKFMWLP---ISYLPAFMVDIVLATILPKPAQ----RVR-----           |  |
| SDR9C5 | X. tropicalis       | YSPGWDAKLVWLP---ASYMPAFITDAVLAFLVLPKPKH----SIH-----          |  |

|        |                 |                                                      |
|--------|-----------------|------------------------------------------------------|
| SDR9C5 | D. rerio        | YSAGWDAKFLWIP---LSYMPACFVDIALKLVMKPAK----GV-----     |
| SDR9C6 | H. sapiens      | YSAGWDAKFFFIP---LSYLPSTLADYILTRSWPKPAQ----AV-----    |
| SDR9C6 | P. paniscus     | YSAGWDAKFFFIP---LSYLPSTLADYILTRSWPKPAQ----AV-----    |
| SDR9C6 | M. musculus     | YSAGWDAKFFFIP---LSYLPASLVDYLLAISRGKPAQ----AA-----    |
| SDR9C6 | S. harrisii     | YSAGWDAQFLYIP---MSYLPTRLDDYLLSKNLQKPAH----AI-----    |
| SDR9C6 | A. carolinensis | YSAGWDAQFFFIP---LSYLPSTALMDLILTWSPPKPAH----AI-----   |
| SDR9C6 | X. tropicalis   | YSVGWDCCKLYHLP---LSYLPSTAVSDYVLCRSAPKPAH----SAK----- |
| SDR9C7 | H. sapiens      | YNPGLDAKLLYIP---LAKLPTPVTDFILSRYLPRPAD---SV-----     |
| SDR9C7 | P. troglodytes  | YNPGLDAKLLYIP---LAKLPTPVTDFILSRYLPRPAD---SV-----     |
| SDR9C7 | M. musculus     | YNPGLDVKFLYLT---LAKLPTPVTDFILSRYLPRPAD---SV-----     |
| SDR9C7 | S. harrisii     | YNPGLDAKLLYLP---LAKFPTALTDFILSRYLPRPAD---SVL-----    |
| SDR9C7 | X. tropicalis   | YSPGWDAKLFYIP---LSYLPSTVLSDYVASRFAPRLSQ---GEK-----   |
| SDR9C8 | H. sapiens      | YSAGWDAKLLYLP---MSYMPSTFLVDAIMYWVSPSPAK---AL-----    |
| SDR9C8 | P. troglodytes  | YSAGWDAKLLYLP---MSYMPSTFLVDAIMYWVSPSPAK---AL-----    |
| SDR9C8 | M. musculus     | YSAGWDAKLFYLP---LSYLPSTFLVDALLYWTSCLKPEK---AL-----   |
| SDR9C8 | M. domestica    | YSAGWDAKLFYLP---LSYLPSTALADFLIMWNYPKPSP---TR-----    |
| SDR9C8 | P. humilis      | YSAGWDAKLLYLP---ISYLPSTALSDALFSLFYPKSVG---KA-----    |
| SDR9C8 | A. carolinensis | YSAGWDAKLFYIP---MSYMPVLVHDLVFGWSYPKPAQ---TS-----     |
| SDR9C8 | X. tropicalis   | YSAGWDAKLFFIP---LSYLPSTVCIDFLLNRSRAKAAH---SI-----    |
| SDR9C8 | P. reticulata   | YSPGWDAKFLWLP---ISYMPSTWISDGFFLRYSPKPKA---SVI-----   |

\*

\*

|        |                     |                    |
|--------|---------------------|--------------------|
| SDR9C1 | H. sapiens          | -----              |
| SDR9C1 | P. paniscus         | -----              |
| SDR9C1 | M. musculus         | -----              |
| SDR9C1 | M. domestica        | -----              |
| SDR9C1 | C. livia            | -----              |
| SDR9C1 | C. picta            | -----              |
| SDR9C1 | X. tropicalis       | -----              |
| SDR9C1 | D. rerio            | -----              |
| SDR9C2 | H. sapiens          | -----              |
| SDR9C2 | P. troglodytes      | -----              |
| SDR9C2 | M. musculus         | -----              |
| SDR9C2 | M. domestica        | -----              |
| SDR9C2 | G. gallus           | -----              |
| SDR9C2 | A. mississippiensis | -----              |
| SDR9C2 | X. tropicalis       | -----              |
| SDR9C2 | D. rerio            | -----              |
| SDR9C3 | H. sapiens          | PNLSPGSPSA--VAR--- |
| SDR9C3 | P. troglodytes      | PNLSPGSPSA--VAR--- |
| SDR9C3 | M. musculus         | -----              |
| SDR9C3 | C. picta            | -----              |
| SDR9C3 | X. tropicalis       | -----              |
| SDR9C3 | D. rerio            | ENMNDSSSNNSNFTKCID |
| SDR9C4 | H. sapiens          | -----              |
| SDR9C4 | P. troglodytes      | -----              |
| SDR9C4 | M. musculus         | -----              |
| SDR9C4 | M. domestica        | -----              |
| SDR9C4 | G. gallus           | -----              |
| SDR9C4 | C. mydas            | -----              |
| SDR9C4 | X. tropicalis       | -----              |
| SDR9C4 | D. rerio            | -----              |
| SDR9C5 | H. sapiens          | -----              |
| SDR9C5 | P. troglodytes      | -----              |
| SDR9C5 | M. musculus         | -----              |
| SDR9C5 | S. harrisii         | -----              |

|        |                 |       |
|--------|-----------------|-------|
| SDR9C5 | G. gallus       | ----- |
| SDR9C5 | A. carolinensis | ----- |
| SDR9C5 | X. tropicalis   | ----- |
| SDR9C5 | D. rerio        | ----- |
| SDR9C6 | H. sapiens      | ----- |
| SDR9C6 | P. paniscus     | ----- |
| SDR9C6 | M. musculus     | ----- |
| SDR9C6 | S. harrisii     | ----- |
| SDR9C6 | A. carolinensis | ----- |
| SDR9C6 | X. tropicalis   | ----- |
| SDR9C7 | H. sapiens      | ----- |
| SDR9C7 | P. troglodytes  | ----- |
| SDR9C7 | M. musculus     | ----- |
| SDR9C7 | S. harrisii     | ----- |
| SDR9C7 | X. tropicalis   | ----- |
| SDR9C8 | H. sapiens      | ----- |
| SDR9C8 | P. troglodytes  | ----- |
| SDR9C8 | M. musculus     | ----- |
| SDR9C8 | M. domestica    | ----- |
| SDR9C8 | P. humilis      | ----- |
| SDR9C8 | A. carolinensis | ----- |
| SDR9C8 | X. tropicalis   | ----- |
| SDR9C8 | P. reticulata   | ----- |

Figure S14. Alignment of the vertebrate SDR9C family variants. For further details see Fig. S13 and Table S14.

\* symbol marks the position of identical amino acid residues of the aligned SDR protein sequences.

|         |                 |                                                               |           |  |
|---------|-----------------|---------------------------------------------------------------|-----------|--|
|         |                 |                                                               | x   x   x |  |
| SDR10E1 | H. sapiens      | MVSIPEYYEGKNVLLTGATGFLGKVLLEKLLRSCPKVNSVYVLRQKAGQTPQERVEEVL   |           |  |
| SDR10E1 | P. troglodytes  | MVSIPEYYEGKNVLLTGATGFLGKVLLEKLLRSCPKVNSVYVLRQKAGQTPQERVEEVL   |           |  |
| SDR10E1 | M. musculus     | MVSIPEYYEGKNILLTGATGFLGKVLLEKLLRSCPRVNSVYVLRQKAGQTPQERVEEIL   |           |  |
| SDR10E1 | S. harrisi      | MVSIPEYYEGKNVLLTGATGFLGKVLLEKLLRSCPKVNSVYVLRQKAGQTPQERVEEVI   |           |  |
| SDR10E1 | G. gallus       | MVSIPEYYEGKNVLLTGATGFMGKVLLEKLLRSCPKVKAVYVLRPKAGQTPPEARIEEIT  |           |  |
| SDR10E1 | C. mydas        | MVSIPEYYEGKNVLLTGATGFMGKVLLEKLLRSCPKVKAVYILVRHKAGQTPQERMEEMI  |           |  |
| SDR10E1 | X. tropicalis   | MISIPEFYRGKNVLITGATGFMGKVLLEKLLRSCPNVKAVYVLRPKASQKPRERVAEMM   |           |  |
| SDR10E1 | D. rerio        | MVTIPEYYVGKNVLITGATGFMGKVLLEKLLRSCPGVKAAYVLRPKAGQAPDARIADMI   |           |  |
| SDR10E2 | H. sapiens      | MSTIAAFYGGKSILITGATGFLGKVLMEKLFRTSPDLKVIYILVRPKAGQTLQQRVVFQIL |           |  |
| SDR10E2 | P. troglodytes  | MSTIAAFYGGKSILITGATGFLGKVLMEKLFRTSPDLKVIYILVRPKAGQTLQQRVVFQIL |           |  |
| SDR10E2 | M. musculus     | MSMIAAFYSNKSILITGATGFLGKVLMEKLFRTSPHLKVIYILVRPKSGQTLQERVVFQIL |           |  |
| SDR10E2 | M. domestica    | MSAIAAYYGGKSILITGATGFMGKVLVEKLFRTSPDLKVIYILVRPKAGQSLQQRVSQMI  |           |  |
| SDR10E2 | G. gallus       | MSSVSAYYNGKTVLITGATGFMGKVLVEKLLRSSPDVKAVYILVRPKAGQSMQERVANML  |           |  |
| SDR10E2 | A. carolinensis | MSSVATYYNEKSVLVTGATGFMGKVLVEKLLRSSPDVKAIYILVRPKAGQLMQNRVEHNV  |           |  |
| SDR10E2 | E. lucius       | MASIADYYAGKSVLITGATGFMGKVLVEKLLRSCPHVRALYLLVRPKAGQSMQERVSDMM  |           |  |
|         |                 | *   *   *   *   *   *   *   *   *   *   *   *   *   *         |           |  |
|         |                 |                                                               |           |  |
| SDR10E1 | H. sapiens      | SGklFDRLRDENPDFREKIIAINSELTPQKLALSEEDKEVIDSTNIIFHCAATVRFNEN   | 1p.0      |  |
| SDR10E1 | P. troglodytes  | SGklFDRLRDENPDFREKIIAINSELTPQKLALSEEDKEVIDSTNIIFHCAATVRFNEN   | 1p.0      |  |
| SDR10E1 | M. musculus     | SSklFDRLRDENPDFREKIIAINSELTPQKLALSEEDKEIIDSTNIVFHCAATVRFNEN   | 1p.0      |  |
| SDR10E1 | S. harrisi      | SGklFDRLRDENPDFRQKI IAINSELTPQKLALTEEDQEIIDSTNIIFHCAATVRFNEN  | 1p.0      |  |
| SDR10E1 | G. gallus       | SCklFDRLREEQPDFKEKIIIVITSELTPQELDLSPVKEKIECINIIFHCAATVRFNET   | 1p.0      |  |
| SDR10E1 | C. mydas        | SCklFDRLRDEQPGFKEKIIAVTSELTPQELDLSEEDKEKLIDCINIIFHCAATVRFNET  | 1p.0      |  |
| SDR10E1 | X. tropicalis   | SCklFDRLRDEQPECAQKVIAISSELTPQELDLSEEDQDMLIDCIDIIFHCAATVRFNES  | 1p.0      |  |
| SDR10E1 | D. rerio        | NcklFDRLREDQPDFAGKIVAINSDLTQPNLDLSAEDQETLTGGINNVFHCATIRFNEP   | 1p.0      |  |
| SDR10E2 | H. sapiens      | DSklFEKVKEVCPNVHEKIRAIYADLNQNDFAISKEDMQELLSCTNIIFHCAATVRFDDT  | 1p.0      |  |
| SDR10E2 | P. troglodytes  | DSklFEKVKEVCPNVHEKIRAIYADLNQNDFAISKEDMQELLSCTNIIFHCAATVRFDDT  | 1p.0      |  |
| SDR10E2 | M. musculus     | NSklFEKVKEVCPNVHEKIRPISADLNQRDFAISKEDVQELLSCTNIIFHCAATVRFDAH  | 1p.0      |  |
| SDR10E2 | M. domestica    | NcklFEKAKEICPNIFEKIRPIYADLTQPDLGISKEDLEELLDHTNIIFHCAATVRFDDS  | 1p.0      |  |
| SDR10E2 | G. gallus       | KCKvFDRVREDCPNFHEKIKIPINAELTPQKLAI SADEEELLTRVNIVFHCAATVRFDEP | 1p.0      |  |
| SDR10E2 | A. carolinensis | KCKlFDRVREECPNFHEKIKPI SAELTHPNLAINPEDTAELLSEVNIVFHCAATVRFDEP | 1p.0      |  |
| SDR10E2 | E. lucius       | KCKlFDRVREYNPDFHQKIVPISSELIQPLAIGPEDKETLTSCINIIFHCAATIRFDEP   | 1p.0      |  |
|         |                 | *   *   *   *   *   *   *   *   *   *   *   *   *             |           |  |
|         |                 |                                                               |           |  |
| SDR10E1 | H. sapiens      | LrdAVQLNVIATRQLILLAQMQKNLEVFMHVSTAYAYCNRKHIDEVVYPPVPDPKKLIDS  | 2p.1      |  |
| SDR10E1 | P. troglodytes  | LrdAVQLNVIATRQLILLAQMQKNLEVFMHVSTAYAYCNRKHIDEVVYPPVPDPKKLIDS  | 2p.1      |  |
| SDR10E1 | M. musculus     | LrdAVQLNVIATRQLILLAQMQKNLEVFMHVSTAYAYCNRKHIDEVVYPPVPDPKKLIDS  | 2p.1      |  |
| SDR10E1 | S. harrisi      | LrdAVQLNVIATRQLILLAQMQKNLEVFMHVSTAYAYCNRKHIDEVVYPPVPDPKKLIDS  | 2p.1      |  |
| SDR10E1 | G. gallus       | LrdAVQLNVLSTKQLLSLAQMQMTNLEVFMHVSTAYAYCNRKHIEVVYPPVPDPKKLMDS  | 2p.1      |  |
| SDR10E1 | C. mydas        | LrdAVQLNVIATQQLI ILAQRMKNLEVFMHVSTAYAYCNRKHIEIIYPPVPDPKKLIGS  | 2p.1      |  |
| SDR10E1 | X. tropicalis   | LrdAMQLNVIATRQLLYLAQKIKKLEVFIIHVSTAYANCNRKQIEEMVYPPVPDPKKLIES | 2p.1      |  |
| SDR10E1 | D. rerio        | LkdAMQLNVLATQKMVSLAHRMKHLEVFIHVSTAYANCNRELIEVVYPPVPDYRKLIDT   | 2p.1      |  |
| SDR10E2 | H. sapiens      | LrhAVQLNVTATRQLLLMASQMPKLEAFIHISTAYSNCNLKHIDEVIYPCPVEPKKIIDS  | 2p.1      |  |
| SDR10E2 | P. troglodytes  | LrhAVQLNVTATRQLLLMASQMPKLEAFIHISTAYSNCNLKHIDEVIYPCPVEPKKIIDS  | 2p.1      |  |
| SDR10E2 | M. musculus     | LreAVQLNVTATQQLLLMASQMPKLEAFIHISTAFSNCNLSHIDEVIYPCPVEPKKIIDS  | 2p.1      |  |
| SDR10E2 | M. domestica    | LrhALQLNVIATQQLLLMASQMPKLEAFIHISTAYSNCNLKHIDEVIYPCSVPEPKLIDS  | 2p.1      |  |
| SDR10E2 | G. gallus       | LkhALQLNAMGTQRLLLELAQMQKLEAFIHISTAYANCVRKCIDEIIYPPPAEPKKLFDL  | 2p.1      |  |
| SDR10E2 | A. carolinensis | LkhALLLNVRGTQQLLALAQMQKNLETFIHVSTAYANCNQRYIDEIIYPPMEPEKKLLDL  | 2p.1      |  |
| SDR10E2 | E. lucius       | LkhALQLNVMATQQLISLAQMPHQLQAFIHISTAYANCNRRHIDDIYPPVPVEPKKLIDS  |           |  |
|         |                 | *   *   *   *   *   *   *   *   *   *   *   *   *             |           |  |
|         |                 |                                                               |           |  |
|         |                 | +   +                                                         |           |  |
| SDR10E1 | H. sapiens      | LewMDDGLVNDITPKLIGDRPNTYIYTKALAEYVVQQEGAKLNVAIVRPSIVGASWKEPF  | 3p.1      |  |
| SDR10E1 | P. troglodytes  | LewMDDGLVNDITPKLIGDRPNTYIYTKALAEYVVQQEGAKLNVAIVRPSIVGASWKEPF  | 3p.1      |  |
| SDR10E1 | M. musculus     | LewMDDGLVNDITPKLIGDRPNTYIYTKALAEYVVQQEGAKLNVAIVRPSIVGASWKEPF  | 3p.1      |  |



|         |                 |                                                                                                                   |      |      |      |
|---------|-----------------|-------------------------------------------------------------------------------------------------------------------|------|------|------|
| SDR10E1 | S. harrisii     | LewMDDGLVNDITPKLIGDRPNTYTYTKALAEYVVQQEGAKLNVAIVRPSIVGASWKEPF                                                      | 3p.1 |      |      |
| SDR10E1 | G. gallus       | LewMDDSLVNDITPKLIGDRPNTYTYTKALAEYVVQQEGARLNTAIIRPSIVGASWKEPF                                                      | 3p.1 |      |      |
| SDR10E1 | C. mydas        | LewMDDGLVKDITPKLIGDRPNTYTYTKALAEYIVQQEGAKLNIAIIRPSIVGASWKEPF                                                      | 3p.1 |      |      |
| SDR10E1 | X. tropicalis   | LewMDDGLVNDITPKLIGDRPNTYTYTKALAEYVVQQEGSKLNIAIVRPSIVGASWKEPF                                                      | 3p.1 |      |      |
| SDR10E1 | D. rerio        | LewMDDKLVSMLTPRLLGDRPNTYTYTKALAEQLVQQECGNLNIAIIRPSIVGASWKEPF                                                      | 3p.1 |      |      |
| SDR10E2 | H. sapiens      | LewLDDAIIDEITPKLIRDWPNIIYTYTKALGEMVVQQESRNLNIAIIRPSIVGATWQEPF                                                     | 3p.1 |      |      |
| SDR10E2 | P. troglodytes  | LewLDDAIIDEITPKLIRDWPNIIYTYTKALGEMVVQQESRNLNIAIIRPSIVGATWQEPF                                                     | 3p.1 |      |      |
| SDR10E2 | M. musculus     | MewLDDSIIEEITPKLIGDRPNTYTYTKALGEIVVQQESGNLNVAIVRPSIVGATWQEPF                                                      | 3p.1 |      |      |
| SDR10E2 | M. domestica    | VewLDDSIIEEITPKLIENRPNTYTYTKALGEMVVYQESGNLNIAIIRPSIVGASWQEPF                                                      | 3p.1 |      |      |
| SDR10E2 | G. gallus       | VewLDESIIQDITPKLLGDWPNTYTYTKALSEYLIQQEKGNLNIAIIRPSIVGASWHEPF                                                      | 3p.1 |      |      |
| SDR10E2 | A. carolinensis | VewMDEFLIEEITPKLIGDWPNTYTFTKALAEYLLQQEKGNINVAIVRPSIVGASWHEPF                                                      | 3p.1 |      |      |
| SDR10E2 | E. lucius       | LewMEDSIVRDITPRLIGDHPNTYTYTKALAECCVQKSSKLSIAIIRPSIVGASWQEPF                                                       | 3p.1 |      |      |
|         |                 | **                ** *                ** *                *                ** *                *                * |      |      |      |
| SDR10E1 | H. sapiens      | pgWIDNFNGPSGLFIaaGKGILRTIRASNNALADLVPDVVVNMSLAAAWYSGVN---rp                                                       | 4p.0 | 5p.0 | 6p.1 |
| SDR10E1 | P. troglodytes  | pgWIDNFNGPSGLFIaaGKGILRTIRASNNALADLVPDVVVNMSLAAAWYSGVN---rp                                                       | 4p.0 | 5p.0 | 6p.1 |
| SDR10E1 | M. musculus     | pgWIDNFNGPSGLFIaaGKGILRTMRASNNALADLVPDVVVNTSLAAAWYSGVN---rp                                                       | 4p.0 | 5p.0 | 6p.1 |
| SDR10E1 | S. harrisii     | pgWIDNFNGPSGLFIaaGKGILRTMRASNNALADLVPDVVVNTSLAAAWYSGVN---rp                                                       | 4p.0 | 5p.0 | 6p.1 |
| SDR10E1 | G. gallus       | pgWIDNFNGPSGLFIaaGKGILRTMRASNGAVADLVPDVVVNMTLAAAWYSGVN---rp                                                       | 4p.0 | 5p.0 | 6p.1 |
| SDR10E1 | C. mydas        | pgWIDNFNGPSGLFIaaGKGILRTMRASNSAVADLVPDVVVNTTLAAAWYSGVN---rp                                                       | 4p.0 | 5p.0 | 6p.1 |
| SDR10E1 | X. tropicalis   | pgWIDNFNGPSGLFIaaGKGILRTMRASNNAVADLIPVDVVVNTTLAAAWYSGVN---rp                                                      | 4p.0 | 5p.0 | 6p.1 |
| SDR10E1 | D. rerio        | pgWIDNFNGPSGIFIIaaGKGILRTMRASNNAVADLVPDVVINTTLAAAWYSGSQRHarp                                                      | 4p.0 | 5p.0 | 6p.1 |
| SDR10E2 | H. sapiens      | pgWVDNINGPNGIIIIatGKGFLRAIKATPMAVADVIPVDVVNMLAVGWYTAVH---rp                                                       | 4p.0 | 5p.0 | 6p.1 |
| SDR10E2 | P. troglodytes  | pgWVDNINGPNGIIIIatGKGFLRAIKATPMAVADVIPVDVVNMLAVGWYTAVH---rp                                                       | 4p.0 | 5p.0 | 6p.1 |
| SDR10E2 | M. musculus     | pgWVDNLNGPSGLIIatGKGFLRSIKATPMAVADVIPVDVVNLTIAVGWYTAVH---rp                                                       | 4p.0 | 5p.0 | 6p.1 |
| SDR10E2 | M. domestica    | pgWVDNLNGPSGLIIatGKGFLRAIKATPRAVADVIPVDVINLTIAVGWHTAVH---rp                                                       | 4p.0 | 5p.0 | 6p.1 |
| SDR10E2 | G. gallus       | pgWIDSFNGTSGIFVaaGKGILRTVIANNEAVADMIPVDVVINLTIAAGWYTAVH---rp                                                      | 4p.0 | 5p.0 | 6p.1 |
| SDR10E2 | A. carolinensis | pgWIDNFNGTSGIFIIaaGKGIIIRTVCNVEAVADVIPVDVAINLILATGWYTAVH---rp                                                     | 4p.0 | 5p.0 | 6p.1 |
| SDR10E2 | E. lucius       | pgWIDNFNGPSGVFIaaGKGILRTMRANNDVADLIPVDVVINLTIAAGWYTAVH---rp                                                       | 4p.0 | 5p.0 | 6p.1 |
|         |                 | *** *    ** *    *    *** *                *    **    ***    *    *    *                                          |      |      |      |
| SDR10E1 | H. sapiens      | RNIMVYNCTTGSTNPFHWGveYHVISTFKRNPLeQAFRRPNVNLTsnHLLYHYWIAVSH                                                       | 7p.2 |      |      |
| SDR10E1 | P. troglodytes  | RNIMVYNCTTGSTNPFHWGveYHVISTFKRNPLeQAFRRPNVNLTsnHLLYHYWIAVSH                                                       | 7p.2 |      |      |
| SDR10E1 | M. musculus     | RNIMVYNCTTGSTNPFHWGveYHVISTFKRNPLeQAFRRPNVNLTsnHLLYHYWIAVSH                                                       | 7p.2 |      |      |
| SDR10E1 | S. harrisii     | RNIMVYNCTTGSTNPFHWGveYHVISTFKRNPLeQAFRRPNVNLTsnHLLYHYWIAVSH                                                       | 7p.2 |      |      |
| SDR10E1 | G. gallus       | RNIMVYNCTTGSTNPFHWGveYHVISTFKRNPLeQAFRRPNVNLTsnHLLYHYWIAVSH                                                       | 7p.2 |      |      |
| SDR10E1 | C. mydas        | RNIMVYNCTTGSTNPFHWGveYHVISTFKRNPLeQAFRRPNVNLTsnHLLYHYWIAVSH                                                       | 7p.2 |      |      |
| SDR10E1 | X. tropicalis   | RNILVYNCTTGSTNPFHWGveYHVISTFKRNPLeQAFRRPNVNLTsnHLLYHYWIAVSH                                                       | 7p.2 |      |      |
| SDR10E1 | D. rerio        | RSLLVYNCTTGGINPFHWGveYHVISTFKRNPLeQAFRRPNVNLTtnHLLINQYWIAVSH                                                      | 7p.2 |      |      |
| SDR10E2 | H. sapiens      | KSTLVYHITSGNMNPNWHKmgVQVLATFEKIPFERPFRRPANFTSNSTFSQYWNVAVSH                                                       | 7p.2 |      |      |
| SDR10E2 | P. troglodytes  | KSTLVYHITSGNMNPNWHKmgVQVLATFEKIPFERPFRRPANFTSNSTFSQYWNVAVSH                                                       | 7p.2 |      |      |
| SDR10E2 | M. musculus     | KSTLIYHSTSGNLNPNWYKmgLQVLATIEKIPFESAfrRPnAdFTSNFTTHYWNtVSH                                                        | 7p.2 |      |      |
| SDR10E2 | M. domestica    | KSILYHCTSGSLNPNCSWIDlgFQVLATFEKAPLEKAFRRPKAdFTTNSFSTYLWNTISH                                                      | 7p.2 |      |      |
| SDR10E2 | G. gallus       | KNMLVYNCTTGGINPFHWGmeQYVMSTFKRNPLeQAFRTPNahlTSnyLINQYWITVSH                                                       | 7p.2 |      |      |
| SDR10E2 | A. carolinensis | KSMLIYNCTTGGMNPFcWGmeHHVISTYKRNPLEKAFRIpKANMTSNYLMHQYWTAVSH                                                       | 7p.2 |      |      |
| SDR10E2 | E. lucius       | KAALVYNCTTGGINPFHWGieHHVMSSFKRNPLeQAFRRPNANITSNYLMNQYWILVSH                                                       | 7p.2 |      |      |
|         |                 | *    *    *    ** *    *                *    *    ** *    *                *    **                                |      |      |      |
| SDR10E1 | H. sapiens      | KAPAFlyDIYLRMTGRSPrmMKTITRLHKAMVFLEYFTSNswVWNTENVNMLMNQLNPED                                                      | 8p.1 |      |      |
| SDR10E1 | P. troglodytes  | KAPAFlyDIYLRMTGRSPrmMKTITRLHKAMVFLEYFTSNswVWNTDNVNMLMNQLNPED                                                      | 8p.1 |      |      |
| SDR10E1 | M. musculus     | KAPAFlyDIYLRMTGRSPrmMKTITRLHKAMVFLEYFTSNswVWNTDNVNMLMNQLNPED                                                      | 8p.1 |      |      |
| SDR10E1 | S. harrisii     | KAPAFlyDIYLRITGRSPrmMKTITRLHKAMVFLEYFTSNswVWNTDNVNMLMNQLNPED                                                      | 8p.1 |      |      |
| SDR10E1 | G. gallus       | KAPAFlyDIYLRITGRSPrmMKTITRLHKAMVFLEYFTSNswIWNTENMTMLMNQLSPED                                                      | 8p.1 |      |      |
| SDR10E1 | C. mydas        | KAPAFlyDIYLRITGRSPrmMKTITRLHKAMMLIEYFTSNswIWNTENVNMLMNQLSPED                                                      | 8p.1 |      |      |
| SDR10E1 | X. tropicalis   | KAPAFlyDVYLRITGRSPrmMKTITRLHKAMMLLEyFTSNswVWNNTENtNMLMSQLSPDD                                                     | 8p.1 |      |      |
| SDR10E1 | D. rerio        | KAPAFlyDLFLRMSGREPrmMKTITRLHKAMMVLEYFTSHswVWNTDNVTMLMNQMGAED                                                      | 8p.1 |      |      |

|         |                 |                                                                         |            |
|---------|-----------------|-------------------------------------------------------------------------|------------|
| SDR10E2 | H. sapiens      | RAPAIYDCYLRLTGRKPrmTKLMNRLRLTVSMLEYFINRSWEWSTYNTEMLMSELSPED             | 8p.1       |
| SDR10E2 | P. troglodytes  | RAPAIYDCYLRLTGRKPrmTKLMNRLRLTVSMLEYFINRSWEWSTYNTEMLMSELSPED             | 8p.1       |
| SDR10E2 | M. musculus     | RVPAIYDFYLRLTGRKPrmTKLMNRLRLTKISMLEYFINHSWEWSTNNTEMLLSELSPED            | 8p.1       |
| SDR10E2 | M. domestica    | MAPAVIYDFYLRLTGRKPrmAKLMNRMLKTISMLEYFINHSWEWSTYNTEMLMSQLSNED            | 8p.1       |
| SDR10E2 | G. gallus       | KAPAILYDLYMRLTGRKPrmMKIINRLHKSMMLLQYFSTQSDWSSDNMNMMLMGQLNTED            | 8p.1       |
| SDR10E2 | A. carolinensis | KAPAFLYDLYLRLTGRKPrmMKLFSRLHKSMTFFEYFTSRTWEWSSDNMNMMLNQLSPKD            | 8p.1       |
| SDR10E2 | E. lucius       | RFPALLYDLYLRLSGQKPqmMRIFNRLHKAIGLLEYFSSQDWEWNSNMNMLMSHLSPED             | 8p.1       |
|         |                 | **  **     *  *  *  *                  **     *  *     *  **          * |            |
|         |                 |                                                                         |            |
| SDR10E1 | H. sapiens      | KktFNIDVRQLHWAHEYIENYCLGTTKKYVLNEEMSGLPAARKHLNklRNIRYGFNTILVIL          | 9p.0 10p.1 |
| SDR10E1 | P. troglodytes  | KktFNIDVRQLHWAHEYIENYCLGTTKKYVLNEEMSGLPAARKHLNklRNIRYGFNTILVIL          | 9p.0 10p.1 |
| SDR10E1 | M. musculus     | KktFNIDVRQLHWAHEYIENYCMGTTKKYVLNEEMSGLPAARKHLNklRNIRYGFNTILVIL          | 9p.0 10p.1 |
| SDR10E1 | S. harrisii     | KktFNIDVRQLHWAHEYIENYCMGTTKKYVLNEEMSGLPAARKHLNklRNIRYGFNTILVIL          | 9p.0 10p.1 |
| SDR10E1 | G. gallus       | KktFNFDVRQLHWAHEYMENYCMGTTKKYVLNEEMSGLPAARKHLNklRNIRYGFNTILVIL          | 9p.0 10p.1 |
| SDR10E1 | C. mydas        | KkvFNFDVRQLHWAHEYMENYCMGTTKKYVLNEEMSGLPAARKHLKklRNIRYGFNTVLVIL          | 9p.0 10p.1 |
| SDR10E1 | X. tropicalis   | KkaFNFDVRQLHWAHEYMENYCMGTTKKYVLNEEMSGLPAARKHLNklRNIRYGFNTILVVL          | 9p.0 10p.1 |
| SDR10E1 | D. rerio        | KkvFNFDVRQLHWAHEYMENYCMGTTKKYVLNEELSGLPAARKHLNklRNIRYTFNTVLVVL          | 9p.0 10p.1 |
| SDR10E2 | H. sapiens      | QrvFNFDVRQLNWLEYIENYVLGVKKYLLKEDMAGIPKAKQRLKrlRNIIHYLFNTALFLI           | 9p.0 10p.1 |
| SDR10E2 | P. troglodytes  | QrvFNFDVRQLNWLEYIENYVLGVKKYLLKEDMAGIPEAKQRLKrlRNIIHYLFNTALFLI           | 9p.0 10p.1 |
| SDR10E2 | M. musculus     | QrvFNFDVRQLNWLEYIENYVLGVKKYLLKEDLAGIPKAKQHLRklRNIIHYLFNTALFLI           | 9p.0 10p.1 |
| SDR10E2 | M. domestica    | QklFNFDVRHLNWLEYTENYICIGVKYLLKEDMAGIPAAKKHLRmlRNIIYYLFNTVVFLI           | 9p.0 10p.1 |
| SDR10E2 | G. gallus       | KklYNFDVRQLHWSEYIESYCLGAKYLLNEDMSGIPAAKQHLRklRNIRYAFNTLLVI              | 9p.0 10p.1 |
| SDR10E2 | A. carolinensis | KklFCFDVRQLHWSEYIENYCLGTTKKYLLNEDMAGIPAAKQHLRklRNIIQYALNTIFLVI          | 9p.0 10p.1 |
| SDR10E2 | E. lucius       | RktFNFDVRQLNWPEYIENYICIGTKYVLNEDMSDIPAAKQHLRklRNIRYTFNTLLLVF            | 9p.0 10p.1 |
|         |                 | *** * * * * * * * * * * *     * *     * ***** * **                      |            |
|         |                 |                                                                         |            |
| SDR10E1 | H. sapiens      | IWRIFIARSQMARNIWFVVSCLCYKFLSYFRASSTMRY                                  |            |
| SDR10E1 | P. troglodytes  | IWRIFIARSQMARNIWFVVSCLCYKFLSYFRASSTMRY                                  |            |
| SDR10E1 | M. musculus     | IWRIFIARSQMARNIWFVVSCLCYKFLSYFRASSTMRY                                  |            |
| SDR10E1 | S. harrisii     | IWRIFIARSQMARNIWFVVSCLCYKFLSYFRASSTMRY                                  |            |
| SDR10E1 | G. gallus       | IWRIFIARSQMARNIWFVVSCLCYKFLSYFRASSTMRY                                  |            |
| SDR10E1 | C. mydas        | IWRIFIARSQMARNIWFVVSCLCYKFLSYFRASSTMRY                                  |            |
| SDR10E1 | X. tropicalis   | IWRVFIARSQMARNIWFVVSMTCKFCLSYFRASSTMRY                                  |            |
| SDR10E1 | D. rerio        | IWRIFIARSQMARNIWFVVSCLCFKFLSYFRASSTMRY                                  |            |
| SDR10E2 | H. sapiens      | AWRLLIARSQMARNVWFFIVSFCYKFLSYFRASSTLKV                                  |            |
| SDR10E2 | P. troglodytes  | AWRLLIARSQMARNVWFFIVSFCYKFLSYFRASSTLKV                                  |            |
| SDR10E2 | M. musculus     | IWRLLIARSQMARNVWFFIVSFCYKFISYFRASSTLKV                                  |            |
| SDR10E2 | M. domestica    | IWRFFIARSQMARNIWFVVSCLCYKFLSYFRASSTFRH                                  |            |
| SDR10E2 | G. gallus       | IWRIFIARSQMARNIWFVVSCLCYKFLSYFRASSTLRH                                  |            |
| SDR10E2 | A. carolinensis | IWRIFIARSQMAQNIWFVNVNLCYKFLSYFRASSTLRH                                  |            |
| SDR10E2 | E. lucius       | IWRVFIARSQMARNIWFVVSCLCFKFLSYFRASSTLTN                                  |            |
|         |                 | ** ***** * * * * * * *****                                              |            |

Figure S15. Alignment of the vertebrate SDR10E family variants. For further details see Fig. S13.

\* symbol marks the position of identical amino acid residues of the aligned SDR protein sequences.

|         |                 |       |                                                              |      |
|---------|-----------------|-------|--------------------------------------------------------------|------|
|         |                 |       | x   x   x                                                    |      |
| SDR11E1 | H. sapiens      | ----  | MAMTGWSCSLVTGAGGFLGQRIIRLLVK-EKELKEIRVLDKAFGPPELREEFskLQNK   | 1p.2 |
| SDR11E1 | P. troglodytes  | ----  | MAMTGWSCSLVTGAGGFLGQRIIRLLVK-EKELKEIRVLDKAFRPELREEFskLQNK    | 1p.2 |
| SDR11E1 | M. musculus     | ----- | MAGWSCSLVTGAGGFVQGRIIKMLVQ-EKELQEVRLDKVFRPETKEEFskLQTK       | 1p.2 |
| SDR11E1 | M. domestica    | ----  | MLPTDRWSCSLVTGAGGFLGQRIIVRLLEEEKELEEIIRVLDFKFSFQQLLEFseLKHK  | 1p.2 |
| SDR11E1 | N. nippon       | ----  | MSLAGVSCSLVTGAGGFLGQRIIVGLLLEEEKEALAEIRLLDKAFSSEALGRFgkFQGK  | 1p.2 |
| SDR11E1 | T. sirtalis     | ----  | MSLGGIRCLVTGAGGFLGQRIIVCQLLTEKESLAEVRLLDKTI SAELQDFkKVRSN    | 1p.2 |
| SDR11E1 | L. crocea       | ----  | MSLKGDVCVVTGACGFLGKRLVRLLE-EENVAEIRLMDKHIQPQLLHSLedCRGD      | 1p.2 |
| SDR11E2 | H. sapiens      | ----- | MGWSCSLVTGAGGFLGQRIIVRLLE-EKELKEIRALDKAFRPELREEFskLQNR       | 1p.2 |
| SDR11E2 | P. troglodytes  | ----- | MGWSCSLVTGAGGFLGQRIIVRLLE-EKELKEIRALDKAFRPELREEFskLQNK       | 1p.2 |
| SDR11E2 | M. musculus     | ----- | MPGWSCSLVTGAGGFLGQRIIQLLVQ-EEDLEEIRVLDFKVRPETRKEFfnLETS      | 1p.2 |
| SDR11E2 | S. harrisii     | ---   | MLQMKNWSCSLVTGAGGFLGQRIIVHLLLEEEQELEEIRLLDKVFSFQQLLEFseLKHK  | 1p.2 |
| SDR11E2 | G. gallus       | ----  | MSLAGVSCSLVTGAGGFLGQRIIVRLLEEEDEALAEIRLLDKAFSREALWSFgkFQGK   | 1p.2 |
| SDR11E2 | G. japonicus    | ----  | MSLVGVKCLVTGAGGFLGQRIIVCQLLEEGEKLAEVRLDKAFSSETLQRFadLKST     | 1p.2 |
| SDR11E2 | D. rerio        | ----  | MALSGEVCVVTGACGFLGKRLVRLLE-EENLSEIRLLDRNIRSELIQTledGRGE      | 1p.2 |
| SDR11E3 | H. sapiens      |       | MADSAQAQKLVLVTGGCGFLGEHVVRMLLQREPRLGELRVFDQHLGPWLEELKtgP---- | 1p.2 |
| SDR11E3 | P. troglodytes  |       | MADSAQAQKLVLVTGGCGFLGEHVVRMLLQREPRLGELRVFDRHLGPWLEELKtgP---- | 1p.2 |
| SDR11E3 | M. musculus     |       | MADSAQVPTLVVLVTGGCGFLGEHVVRMLLREPRRLRELRVFDLHSSWLEELKagP---- | 1p.2 |
| SDR11E3 | S. harrisii     | --    | MTDGGRNVLVLVTGGCGFLGEHMIRTLLEMEPRLKELRVFDLHGPWLEALNpgS----   | 1p.2 |
| SDR11E3 | Z. albicollis   | ----- | MDGAWVVLVTGGCGFVGERIVELL-SQQDYIKEVRVFDVSAREEVEKFStaP----     | 1p.2 |
| SDR11E3 | A. carolinensis | --    | MGSTSRNQIYVLVTGGCGFLGKHLVQMLLEQEPDLAEVRVFDLHLDSEMRHLNrv----  | 1p.2 |
| SDR11E3 | X. tropicalis   | ---   | MTAGSGQVYVVTGGCGFLGSHLVRMLLEHEKNISEIRVFDLHLDSELRSLSnnR----   | 1p.2 |
| SDR11E3 | D. rerio        | -     | MSNNKSKLTYVITGGCGFLGQHLRLVLEKKKNVKEIRLFDKNVFPsIQSestEd----   | 1p.2 |
|         |                 |       | *   *   *                   *                   *   *   *    |      |

|         |                 |                                                                                           |      |
|---------|-----------------|-------------------------------------------------------------------------------------------|------|
| SDR11E1 | H. sapiens      | TKLTVLEGDILDEPFLKRACQDVSVIIHTACIIDVFGVTHRESIMNVNVkgTQLLLEACV                              | 2p.2 |
| SDR11E1 | P. troglodytes  | TKLTVLEGDILDEPFLKRACQDVSVIIHTACIIDVFGVTHRESIMNVNVkgTQLLLEACV                              | 2p.2 |
| SDR11E1 | M. musculus     | TKVTVLEGDILDAQCCLRRACQGISVVIHTAAVIDVTGVI PRQTILDVNLkgTQNLLLEACV                           | 2p.2 |
| SDR11E1 | M. domestica    | TKVTVLEGDILDEQFVHKACQGISAVIHTACIIDTGICIKKEVImkvNLkgTQLLLEACI                              | 2p.2 |
| SDR11E1 | N. nippon       | TEVKILEGDIRDATFLHRACQGSLSVIHTASIIDTLGLIDKQLLWEVNVtgTQLLLEACV                              | 2p.2 |
| SDR11E1 | T. sirtalis     | TLLTVLQGDIRDVVFLETAVQGVSLVIAACIIDPRGFIDRKILWDVNVrgTQLLLEACL                               | 2p.2 |
| SDR11E1 | L. crocea       | TKLSVFEGDIRDGFLLKKVCRGASIVFHIASIIDVNDSEYSEIYGVNVkgTQLLLEACI                               | 2p.2 |
| SDR11E2 | H. sapiens      | TKLTVLEGDILDEPFLKRACQDVSVIIHTACIIDVFGVTHRESIMNVNVkgTQLLLEACV                              | 2p.2 |
| SDR11E2 | P. troglodytes  | TKLTVLEGDILDEPFLKRACQDISVIHTACIIDVFGVTHRESIMNVNVkgTQLLLEACV                               | 2p.2 |
| SDR11E2 | M. musculus     | IKVTVLEGDILDQYLRACQGISVVIHTAAIIDVTGVI PRQTILDVNLkgTQNLLLEACI                              | 2p.2 |
| SDR11E2 | S. harrisii     | TKVTVLQGDILDKEFLHKACQGVTAIVHSACIIDTLGLWRRKETIMNVNIkgTQFLLEACI                             | 2p.2 |
| SDR11E2 | G. gallus       | TEVKILEGDIRDVEFLHRACQGVSLVHTASIIDTLGLVEKQLLWEVNVtgTQMLLEACA                               | 2p.2 |
| SDR11E2 | G. japonicus    | TPLTIMKGDIRDMSFLRKAVQGISLVIHSACVIDILGLVDKPVLDINvtgTRLLLEMCCL                              | 2p.2 |
| SDR11E2 | D. rerio        | TKVSVIEGDIRDRELLRRACKGATLVFHTASLIDYNGAVEYSELHAVNVkaTRLLLETCI                              | 2p.2 |
| SDR11E3 | H. sapiens      | VRVTAIQGDVTQAHEVAAAVAGAHVVIHTAGLVDVFGGRASPKEIHEVNVqgTRNVIEACV                             | 2p.2 |
| SDR11E3 | P. troglodytes  | VRVTAIQGDVTQAHEVAAAVAGAHVVIHTAGLVDVFGGRASPKEIHEVNVqgTRNVIEACV                             | 2p.2 |
| SDR11E3 | M. musculus     | VQVTAIQGDVTQAHEVAAAMSGSHVVIHTAGLVDVFGKASPKEIHKVNVqgTQNVIDACV                              | 2p.2 |
| SDR11E3 | S. harrisii     | VQVTPIQGDVTRAEDVAAAVAGTGVIIHMAGLVDVWQNDPEVIRVNVqgTQNVIEACV                                | 2p.2 |
| SDR11E3 | S. harrisii     | TRVTVMRGDIRDPNALLAAMRGVHVVLHTAAVVDYRGTVPFWEMRAVNVggTENVVRACC                              | 2p.2 |
| SDR11E3 | A. carolinensis | ---TLIQGDITNPEDVRTAVQGAVVIHTASLVDVWGRFSPEKINAVNVcgTQNVIEACV                               | 2p.2 |
| SDR11E3 | X. tropicalis   | VRVRLISGDISHLDDVREALHGSHLVIHTASLVDVWGRVPASKINEVNVtgTENVLQACK                              | 2p.2 |
| SDR11E3 | D. rerio        | VKVVI IQGDITKYEDVRNAFLGADLVFHAASLVDVWYKIEKVI FAVNVqgTENAIKACV                             | 2p.2 |
|         |                 | *                   *   *   *                   *                   *                   * |      |

|         |                |                                                                |       |  |
|---------|----------------|----------------------------------------------------------------|-------|--|
|         |                |                                                                | +   + |  |
| SDR11E1 | H. sapiens     | QASVPVFIYTSSIEVAGPNSYKEIIQNGHEEEPLENTWPAPYPHsKKLAEKAVLAANGWN   |       |  |
| SDR11E1 | P. troglodytes | QASVPVFIYTSSIEVAGPNSYKEIIQNGHEEEPLENTWPAPYPHsKKLAEKAVLAANGWN   |       |  |
| SDR11E1 | M. musculus    | QASVPAFIFCSSVDVAGPNSYKKIVLNGHEEQNHSTWSDPYPYsKKMAEKAVLAANGSM    |       |  |
| SDR11E1 | M. domestica   | SANVPVFLHTSTLEVAGPNSFIKHVRNGHEGEPLETKWSNAPYsKKLAEKTI LAANGQL   |       |  |
| SDR11E1 | N. nippon      | RCNVQHFIYTSTIEVTGPNCCKGDPVFNQDDEDTAYESVSKSPYAQSKRLAEDSVLKADGQV |       |  |
| SDR11E1 | T. sirtalis    | RNDVQYFIYTSSLEVTGPNNRGDPIDYDGEDTIYQMTQGGPYAETKREAEKCVLQLDGLP   |       |  |
| SDR11E1 | L. crocea      | QENVVSFIYTSTVEVMGPNLKGPIVNGNEDTVYDSSLKFNYsKTKREAEQRTLQAHSEV    |       |  |

|         |                 |                                                                |      |      |
|---------|-----------------|----------------------------------------------------------------|------|------|
| SDR11E2 | H. sapiens      | QASVPVFIYTSSIEVAGPNSYKEIIQNGHEEEPLENTWPTPYPSKKLAEKAVLAANGWN    |      |      |
| SDR11E2 | P. troglodytes  | QASVPVFIYTSSIEVAGPNSYKEIIQNGHEEEPLENTWRTPYPSKKLAEKAVLAANGWN    |      |      |
| SDR11E2 | M. musculus     | QASVPAFIFSSSVVAGPNSYKEIVLNGHEEECHESWTSDPYPSKKMAEKAVLAANGSM     |      |      |
| SDR11E2 | S. harrisii     | AAEVPVFLYTSSVEVAGPNSYKMSVRNGHEDDLLESKWSNAYPYPSKKLAEKAVLAADGQL  |      |      |
| SDR11E2 | G. gallus       | HCNVQHFIYTTSTIEVAGPNSYKGDPIFNGDEDTPYESTSKFPYAQSKRLAEECVLKADGQM |      |      |
| SDR11E2 | G. japonicus    | LQDVKYFIYTSSLEVTPGNRKGDPMCNGDEDSVYRVTDGFFPYAETKREAESVLELDGLP   |      |      |
| SDR11E2 | D. rerio        | QQSVSSFIYTSSIEVACPNSRSGEPIINGHEDTPYSSYPISNYSKTKQEAEQICLQANGEL  |      |      |
| SDR11E3 | H. sapiens      | QTGTRFLVYTSSMEVVGPNTKGHPFYrgNEDTPYEAVHRHPYPCSKALAEWLVLLEANGRk  | 3p.1 | 4p.0 |
| SDR11E3 | P. troglodytes  | QTGTRFLVYTSSMEVVGPNTKGHPFYrgNEDTPYEAVHRHPYPCSKALAEWLVLLEANGRk  | 3p.1 | 4p.0 |
| SDR11E3 | M. musculus     | QTGTQYLVYTSSMEVVGPNIKGHPFYrgNEDTPYEAVHSHPYPCSKALAEQLVLLEANGRk  | 3p.1 | 4p.0 |
| SDR11E3 | S. harrisii     | QTGTRFLVYTSSMEALGPNNKRPFYrgNEDTPYEVIHTEPYPRSKALAERLVLLEANGRk   | 3p.1 | 4p.0 |
| SDR11E3 | S. harrisii     | ALSIPYLLYTSSIAAVGPNTSCEPLLrgNEDTQYTGVEVELPYGKTKAMAEKIVLEANGAk  | 3p.1 | 4p.0 |
| SDR11E3 | A. carolinensis | SEGTQYLVYTSSMEVVGPNTKGDHFFYrgNEDTPYKSIHELPPVSKTKAEKLVLEANGRp   | 3p.1 | 4p.0 |
| SDR11E3 | X. tropicalis   | EEGVQYLVYTSSMEVVGPNIHGDHFFYrgNEETEYRIYHKEPYPLSKAKAEKLVLEANGTk  | 3p.1 | 4p.0 |
| SDR11E3 | D. rerio        | EIGIQYLVYTSSMEVVGPNVKGDEFVrgNEDTPYNI FHEMPYPKSKAAAEKIVLEANGTk  | 3p.1 | 4p.0 |
|         |                 | * * * *                                                        |      |      |
| SDR11E1 | H. sapiens      | LKNGGTLTYTCALRPMYIYEGSRFLSASINEALNNNGILSSVG-KFSTVNPVYVGNVAWA   |      |      |
| SDR11E1 | P. troglodytes  | LKNGGTLTYTCALRPMYIYEGSRFLSASVNEALNNNGILSSVG-KFSTVNPVYVGNVAWA   |      |      |
| SDR11E1 | M. musculus     | LKNGGTLNTCALRPMYIYERSPFIFNAIIIRALKNKGILCVTG-KFSIANPVYVENVAWA   |      |      |
| SDR11E1 | M. domestica    | LRNGATMHTCALRPMYIYEGSQLLQDQIIIRALDNDKTFIRNK-EGAQANPVYVGNVAWA   |      |      |
| SDR11E1 | N. nippon       | LKDGGMLMTCALRSMYIFGEGCPLQGHLDKCLLNKNVYLRFSRKEALVNPVYVGNIAWA    |      |      |
| SDR11E1 | T. sirtalis     | LKGGNSFVTCALRSMYIYEGSSFLLGHLDESILNNNVFLRLSRKEAIVNPVYVGNIAWA    |      |      |
| SDR11E1 | L. crocea       | LQNGGRLATCTLRPMYIYEGGCRFLLGHMGDALRNKDVLFMRSLPEARVNPVYVGNVAMA   |      |      |
| SDR11E2 | H. sapiens      | LKNGDTLYTCALRPYIYEGGGPFLSASINEALNNNGILSSVG-KFSTVNPVYVGNVAWA    |      |      |
| SDR11E2 | P. troglodytes  | LKNGDTLYTCALRPYIYEGGGPFLSASINEALNNNGILSSVG-KFSTVNPVYVGNVAWA    |      |      |
| SDR11E2 | M. musculus     | LKNGGTLQTCALRPMCIYEGERSPLISNIIIMALKHKGILRSFG-KFNTANPVYVGNVAWA  |      |      |
| SDR11E2 | S. harrisii     | LRNGTVLRTCCLRPMYIYEGGSIFLQNEINHALKNDKTFTRKS-KGSMANQVYVDNVAWA   |      |      |
| SDR11E2 | G. gallus       | LKDGGVLVTCALRSMYIFGEGCPLQGHLDKCLLNKNVYLRFSRKEALVNPVYVGNIAWA    |      |      |
| SDR11E2 | G. japonicus    | LKDGGSSFVTCALRSMYIFGEGSPFLLKHVDEAILNNRVFLRISRKEALVNPVYVGNVAWA  |      |      |
| SDR11E2 | D. rerio        | LRDGGHLATCALRPMFIYEGPCRFTLNKLRAIRSGNVQHRLSQSAKVNPNVYVGNAAALA   |      |      |
| SDR11E3 | H. sapiens      | VRGGLPLVTCALRPRTGIYEGGHQIMRDFYRQGLRLGGWLFRAIPASVEHGRVYvgNVAWM  | 5p.2 |      |
| SDR11E3 | P. troglodytes  | VRGGLPLVTCALRPRTGIYEGGHQIMRDFYRQGLRLGGWLFRAIPASVEHGRVYvgNVAWM  | 5p.2 |      |
| SDR11E3 | M. musculus     | VNGGLPLVTCALRPRTGIYEGGHQVMRDFYQGLRFGGRLFRAVPASVEHGRVYvgNVAWM   | 5p.2 |      |
| SDR11E3 | S. harrisii     | VRGGLPLVTCALRPRTGIFEGGHELMLSFYEKAQNTGGWLLRSIPPAVEHGRVYagNVAWM  | 5p.2 |      |
| SDR11E3 | S. harrisii     | LSNGGTLRTCILRANTVYGEKAGFLQELYLLARARRGVNLNLEPEDTERNHTYvgNVAWM   | 5p.2 |      |
| SDR11E3 | A. carolinensis | mKGGKHLVTCALRPRTGIYGENHPLIKEFYKQGLLTGRWMFRAIPASVEHGRVYvgNVAWM  | 5p.2 |      |
| SDR11E3 | X. tropicalis   | mKGGKMLYTCLSRPTGIYEGGHELMKKFHRQGLRTGRCMFRAIPPAIEHGRVYvgNVAWM   | 5p.2 |      |
| SDR11E3 | D. rerio        | VEGGNILYTCLSRPTGIYEGHQHLMKDFYLNsvrNGGWVMRGVPPHTEHGRVYagNVAWM   | 5p.2 |      |
|         |                 | * * * *                                                        |      |      |
| SDR11E1 | H. sapiens      | HILALRALQDPKKAPSIRGQFYYISDDTPHQSYDNLNLTLSKEFGLR-LDSRWSFPLSLM   |      |      |
| SDR11E1 | P. troglodytes  | HILALRALQDPKKAPSIRGQFYYISDDTPHQSYDNLNLTLSKEFGLR-LDSRWSLPLSLM   |      |      |
| SDR11E1 | M. musculus     | HILAARGLRDPKKSTSIQGGQFYYISDDTPHQSYDDLNTLSKEWGLR-PNASWSLPLPLL   |      |      |
| SDR11E1 | M. domestica    | HVLALRTLQDSEKAQSIGGQFYYISDDTPHQSYSEFNEMTKEWGFK-LGSKIIGIPLTFL   |      |      |
| SDR11E1 | N. nippon       | HVQAAKALQVPQKAKHIRGQFYYISDDTPHMSYADLNLYELTRELGFG-IEPRLPMPKML   |      |      |
| SDR11E1 | T. sirtalis     | HIQVAKAMRNPTKVQIQGRFYYISDDSPHTSYSDFNLYELTKELGFG-IEPKMPMPVTLL   |      |      |
| SDR11E1 | L. crocea       | HLQAARSLKDPQKRNvVGKGFYFISDDTPHVSYSDFNHNMMSPILGFI-IQEKMLPLRLF   |      |      |
| SDR11E2 | H. sapiens      | HILALRALRDPKKAPSVRGQFYYISDDTPHQSYDNLNLTLSKEFGLR-LDSRWSLPLTLM   |      |      |
| SDR11E2 | P. troglodytes  | HILALRALRDPKKAPSVRGQFYYISDDTPHQSYDNLNLTLSKEFGLR-LDSRWSLPLTLM   |      |      |
| SDR11E2 | M. musculus     | HILAARGLRDPKKSPNIQGEFYYISDDTPHQSFDDISYTLSSKEWGFC-LDSSWSLPLVPLL |      |      |
| SDR11E2 | S. harrisii     | HVLALRALRDEPKAQSIGGQFYFITDDTPPQSYSEFNVEVSKEWGFK-LGSKLGIPLTLL   |      |      |
| SDR11E2 | G. gallus       | HVQAAKALQVPQKARHIRGQFYYISDDTPHMSYADLNLYELTKELGFG-IEPWLPMPLTLM  |      |      |
| SDR11E2 | G. japonicus    | HVQVAKAMRNPAKAKQVRGRFYYISDDSPHLSYADFNLHELAKELGFG-VEPRLRMPPLTML |      |      |
| SDR11E2 | D. rerio        | HLQAGRALRDEKRAVVGNGFYYSDDTPHISYCDLTHALMSPLGFS-IQNKPIPLPIFLL    |      |      |
| SDR11E3 | H. sapiens      | HVLAARELEQ--RATLMGGQVYFCYDGSYPYRSYEDFNMEFLGPCGLRLVGARPLLPYWLL  |      |      |
| SDR11E3 | P. troglodytes  | HVLAARELEQ--RAALMGGQVYFCYDGSYPYRSYEDFNMEFLGPCGLRLVGARPLLPYWLL  |      |      |
| SDR11E3 | M. musculus     | HILVARELEQ--RAALMGGQVYFCYDKSPYKSYEDFNMEFLSPCGLRLIGAHPLLPYWLL   |      |      |

|         |                 |                                                               |
|---------|-----------------|---------------------------------------------------------------|
| SDR11E3 | S. harrisii     | HTLAARELGS--RPSTMGGQVYFCYDDSPYKSYEDFNMEILGRCGIRILGTRPLLPCLL   |
| SDR11E3 | S. harrisii     | HVLAARHLQL--KAELLAGQVYYCYDDTPGRKGFLVRHQLSSAD-PSVKLGSHIPYWK    |
| SDR11E3 | A. carolinensis | HLLAARKIQE--SPVSMGGQVYYCYDSSPYKSYEDFNMEILRPCGFRLLGSRPLIPYFLL  |
| SDR11E3 | X. tropicalis   | HLLAARQLQI--HPSTLGGQVYFCYDSSPYKSYEDFNMEFLSACGFKMIGSRPLVPYFLL  |
| SDR11E3 | D. rerio        | HLLAARALQE--HNNRLGGEYFCYDDSPYKPYDEFNMQFLSAFNFRSL----RLPVWML   |
|         |                 | * * * * *                                                     |
|         |                 |                                                               |
| SDR11E1 | H. sapiens      | YWIGFLEIVSFLLRPIYTYRPPFNHRHIVTLSNSVFTFSYKKAQRDLAYKPLYSWEEAKQ  |
| SDR11E1 | P. troglodytes  | YWIGFLEIVSFLLRPIYTYRPPFNHRHIVTLSNSVFTFSYKKAQRDLAYKPLYSWEEAKQ  |
| SDR11E1 | M. musculus     | YWLAFLETVSFLLRPVYRYRPLFNRLHITLSNSTFTFSYKKAQRDLGYEPLVNWEEAKQ   |
| SDR11E1 | M. domestica    | YWAAFLELMISFMLGPIFYEPFNRLHLLTLTNSIFTFSYKKAQKDFGYKPRFSWLEAKQ   |
| SDR11E1 | N. nippon       | YYFSLLEIVSFLLRPFVRYIPSTNRHLVTLNTPFTFSYRKAQKDFGYMPRYTWEAKQ     |
| SDR11E1 | T. sirtalis     | YYYALFLEILSFLLRPFVRYVPSINRFLVILLNTPFSFSYKKAQRDFNYTPRYSWEEAKQ  |
| SDR11E1 | L. crocea       | YVVCFLLEVLCMMLRPFVRITPPLNRQLLTMLNTPFSFSYQKAKRDLGYIPRYTWEARK   |
| SDR11E2 | H. sapiens      | YWIGFLEIVSFLLSPIYSQPPFNHRHTVTLNSVFTFSYKKAQRDLAYKPLYSWEEAKQ    |
| SDR11E2 | P. troglodytes  | YWIGFLEIVSFLLSPIYSQPPFNHRHTVTLNSVFTFSYKKAQRDLAYKPLYSWEEAKQ    |
| SDR11E2 | M. musculus     | YWLAFLETVSFLLSPIYRIYIPFNRLHIVTLSGSTFTFSYKKAQRDLGYEPLVSWEEAKQ  |
| SDR11E2 | S. harrisii     | YWAAFVLELMISFMLSPIFYIYEPFNCHFLTLTNSVFTLSCKKAKKDLGYEPRVSWLEARK |
| SDR11E2 | G. gallus       | YYFSLLEIVSFMLRPFVRYIPSTNRHLVTLNTPFTFSYRKAQKDFGYVPRYTWEAKR     |
| SDR11E2 | G. japonicus    | YCYALLLEIMSFLRPFVRYIPVINRHLTVLNTPTTFSFQKAQRDFGYAPRYSWEEAKQ    |
| SDR11E2 | D. rerio        | YLLAFFMEILQAVLRPVLRFPTPLNRQLVTMNTPTFSFSYQKACREFGYSPRYDWEEARR  |
| SDR11E3 | H. sapiens      | VFLAALNALLQWLLRPLVLYAPLLNPTYLAVANTTFTVSTDKAQRHFGYEPLFSWEDSRT  |
| SDR11E3 | P. troglodytes  | VFLAALNALLQWLLRPLVLYAPLLNPTYLAVANTTFTVSTDKAQRHFGYEPLFSWEDSRT  |
| SDR11E3 | M. musculus     | VLLATLNALLQWLLRPLVLYTPLLNPYTLAMANTTFTVSTNKAQRHFGYKPLFSWEEESRT |
| SDR11E3 | S. harrisii     | FFLATLNAFLQWLLRPLVYLTALLNPTYLATANTTFTVCTDKAQRHFGYQPLYGWEEESRD |
| SDR11E3 | S. harrisii     | WLMIQLHRIIRAILSPFWRQPFPLNVPLNLTIVTTFSEFETDKASRHFGYKPLFTWQESRL |
| SDR11E3 | A. carolinensis | HLIAFLNVFLQWVLKPFPTYAPILNPTYLVIASTTFTVATDKAQRHFGYKPYTWEEESLS  |
| SDR11E3 | X. tropicalis   | YLLALLNTLLQWVLHRRFFIYAPILNPTYLAVASTTFTVQTDKAEKHFGYRPLYAWEEAAK |
| SDR11E3 | D. rerio        | WIIAWMNDMVRWVWLKPIYNYTPLLNKYTLAVACTSFTVSTDKAFRHFQYQPLYSWQQCLS |
|         |                 | * * * * *                                                     |
|         |                 |                                                               |
| SDR11E1 | H. sapiens      | KTVEWVGSLVDRHKETLKSQTQ-----                                   |
| SDR11E1 | P. troglodytes  | KTVEWVGSLVDRHKETLKSQTQ-----                                   |
| SDR11E1 | M. musculus     | KTSEWIGTIVEQHREILDTKCQ-----                                   |
| SDR11E1 | M. domestica    | KTSQWIGTLVAQNSEYQKTKTP-----                                   |
| SDR11E1 | N. nippon       | RTAQWIASMVPQRREYLKSKAA-----                                   |
| SDR11E1 | T. sirtalis     | RTSQWIADITPLRAAYLKSKT-----                                    |
| SDR11E1 | L. crocea       | HTIEWLASQLPKERERIRAK-----                                     |
| SDR11E2 | H. sapiens      | KTVEWVGSLVDRHKETLKSQTQ-----                                   |
| SDR11E2 | P. troglodytes  | KTVEWVGSLVDRHKETLKSQTQ-----                                   |
| SDR11E2 | M. musculus     | KTSEWIGTLVEQHRETLDTKSQ-----                                   |
| SDR11E2 | S. harrisii     | KTSQWVGTLAKNRENLIKIKTP-----                                   |
| SDR11E2 | G. gallus       | YTSQWIASIVPQRREYLKSKKA-----                                   |
| SDR11E2 | G. japonicus    | RTSRWIAEVTPLRTTYLRSKEV-----                                   |
| SDR11E2 | D. rerio        | STTDWLASVLPAAERRLANKT-----                                    |
| SDR11E3 | H. sapiens      | RTILWVQAATGSAQ-----                                           |
| SDR11E3 | P. troglodytes  | RTILWVQAATGSAQ-----                                           |
| SDR11E3 | M. musculus     | RTIQWVQAMEGSAR-----                                           |
| SDR11E3 | S. harrisii     | RTVSWVKTKKGCSGPRH-----                                        |
| SDR11E3 | S. harrisii     | RTAQWLKAAAGSLGPPQLQEKKN-----                                  |
| SDR11E3 | A. carolinensis | RTVKWLQEVDTQTQAGK-----                                        |
| SDR11E3 | X. tropicalis   | RTITWIKSLEVREKDLKDVGAAGNYCCN                                  |
| SDR11E3 | D. rerio        | RTQSWVNTFFPETSTKDK-----                                       |
|         |                 | * *                                                           |

Figure S16. Alignment of the vertebrate SDR11E family variants. For further details see Fig. S13.

\* symbol marks the position of identical amino acid residues of the aligned SDR protein sequences.

|         |                 |                                                               |
|---------|-----------------|---------------------------------------------------------------|
| SDR12C1 | H. sapiens      | -----MESALPAAGFLYWVGAGTVAY--LALR-ISYSLFTALRVWGVGNE            |
| SDR12C1 | P. troglodytes  | -----MESALPAAGFLYWVGAGTVAY--LALR-ISYSLFTALRVWGVGNE            |
| SDR12C1 | M. musculus     | -----MECAPPAAGFLYWVGASTIAY--LALR-ASYSLFRAFQVWCVGNE            |
| SDR12C1 | M. domestica    | -----MESYGFLYWVGTVAY--LSLR-LSYSLFSAIRVWGLAHE                  |
| SDR12C1 | A. carolinensis | -----MEASESFLAPWTGFFYWVGAVGAY--WTVL-LLRYLRYIVRVWVTGNP         |
| SDR12C1 | Z. albicollis   | -----MVAPAALPAVGLFYWVGALGALY--AAAL-ASYRLLAGLRVWVLGSG          |
| SDR12C1 | X. tropicalis   | -----MATESLAEVPPVPGCNCFWYLGVAAVW--WGLR-AAWCLLDGARVWVLGSG      |
| SDR12C1 | P. latipinna    | -----MNRDSVDEMMSRAETPLFWVGAFTVAS--MALW-LLYRLLTGFRIWILGNG      |
| SDR12C2 | H. sapiens      | -----MGDVLEQFFILTGLLVCLA--CLAKCVRFSRCVLLNWKVLP-               |
| SDR12C2 | P. troglodytes  | -----MGDVLEQFFILTGLLVCLA--CLAKCVRFSRRILLNWKVLP-               |
| SDR12C2 | M. musculus     | -----MEKLFIAAGLFVGLV--CLVKCMRFSQHLFLRFCKALP-                  |
| SDR12C2 | S. harrisii     | -----MGEIQDQLFILIGALVCLK--YLLKCVKFSKYFLLRLWNPLP-              |
| SDR12C2 | G. gallus       | -----MEDFQHQLLIVTGALICFS--ALLKCIRFMKYTFPHVWSALP-              |
| SDR12C2 | A. carolinensis | -----                                                         |
| SDR12C2 | X. tropicalis   | -----MEQFLFVVGLITCLY--LTVKFFGFMLYLFQHLRGVLP-                  |
| SDR12C2 | D. rerio        | -----MTLTEIIFVLTGTCAILV--FGGKIASLIMMLITKLCFCLP-               |
| SDR12C3 | H. sapiens      | MAAVDSFYLLYREIARSCNCYME-ALALVGAWYTARKSITVICDFYSLIRL-HFIPRLGS  |
| SDR12C3 | P. troglodytes  | MAAVDSFYLLYREIARSCNCYME-ALALVGAWYTARKSITVICDFYSLIRL-HFIPRLGS  |
| SDR12C3 | M. musculus     | MAAVDSFYLLYREIARSCNCYME-ALALVGAWYTARKSITVICDFYSLVRL-HFIPRLGS  |
| SDR12C3 | S. harrisii     | MAAVDSFYLLYREIARSCNCYME-ALALVGAWYTARKSITVICDFYSLIRL-HFIPRLVS  |
| SDR12C3 | G. gallus       | MAAVDRFNLLYREISRSCSVYIE-ALAIVGAWYTVRKCLTLVFNNTYSMIRL-HALPKLVG |
| SDR12C3 | G. japonicus    | MAAVDSFSLLRDIGRTCNCYME-TLALIGALYTAKMCFTFVNDTYTLVRL-HFIPRLVR   |
| SDR12C3 | X. tropicalis   | MAAVDSFHLLYRQVAWSCQSHME-FLAVVGALYTAGKGLKICQSYNLIRL-HITPLLFs   |
| SDR12C3 | L. oculatus     | MAAVDSFYLLYREIARSCNCYVE-TLALVGAFYTASTAVAIAADCYSLIRL-HFIPRLMS  |

|         |                 |                                                               |      |      |      |
|---------|-----------------|---------------------------------------------------------------|------|------|------|
|         |                 | x x x                                                         |      |      |      |
| SDR12C1 | H. sapiens      | -AGVGPGLGEWavVTGSTDGIGKSYAEelAKHGMKVVLISRSKDKLDQVSSEikeKFKVE  | 1p.2 | 2p.0 | 3p.2 |
| SDR12C1 | P. troglodytes  | -AGVGPGLGEWavVTGSTDGIGKSYAEelAKHGMKVVLISRSKDKLDQVSSEikeKFKVE  | 1p.2 | 2p.0 | 3p.2 |
| SDR12C1 | M. musculus     | -ALVGPRLGEWavVTGGTDGIGKAYAEelAKRGMKIVLISRSQDKLNQVSNNikeKFNVE  | 1p.2 | 2p.0 | 3p.2 |
| SDR12C1 | M. domestica    | -DGVGPALGEWavVTGSTDGIGRSYAEelAKRGMKIVLISRSQEKLEKVEANDikeKFKVE | 1p.2 | 2p.0 | 3p.2 |
| SDR12C1 | Z. albicollis   | AAAVGPALGAWavVTGATDGIGKAYAEelARRGMKVVLISRSKEKLDQVSTEireKYKVE  | 1p.2 | 2p.0 | 3p.2 |
| SDR12C1 | A. carolinensis | -GAVGPHLGAWavVTGATDGIGKAYTEelAKRGLKVVLISRSQEKLDQVASDirEKFKVE  | 1p.2 | 2p.0 | 3p.2 |
| SDR12C1 | X. tropicalis   | -AQVGPRIGKWavVTGATDGIGKAYAEelAKRGMNIVLISRSPEKLEEVAKQikeKFKVE  | 1p.2 | 2p.0 | 3p.2 |
| SDR12C1 | P. latipinna    | -QLLTPKLGKWavVTGATDGIGKSYAEelARRGFAMMLISRSQEKLDQVARSLeEQFKVE  | 1p.2 | 2p.0 | 3p.2 |
| SDR12C2 | H. sapiens      | -KSFLRSMGQWavITGAGDGIGKAYSFelAKRGLNVVLISRTLEKLEAIATEieRTTGRS  | 1p.2 | 2p.0 | 3p.2 |
| SDR12C2 | P. troglodytes  | -KSFLQSMGQWavITGAGDGIGKAYSFelAKRGLNVVLISRTLEKLEAIATEieRTTGRS  | 1p.2 | 2p.0 | 3p.2 |
| SDR12C2 | M. musculus     | -SSFLRSMGQWavITGAGDGIGKAYSFelARHGLNVVLISRTLEKLQTIAEieRTTGSC   | 1p.2 | 2p.0 | 3p.2 |
| SDR12C2 | S. harrisii     | -KSFFRSMGEWavITGAGDGIGKAYSelAKHGLNIVMISRTLEKLQAVAKGieQTTGSQ   | 1p.2 | 2p.0 | 3p.2 |
| SDR12C2 | G. gallus       | -QAFFRSLGEWavVTGAGDGLGKAYSFelAKRGLNIVMISRTLEKLQRVANEieQATGQK  | 1p.2 | 2p.0 | 3p.2 |
| SDR12C2 | A. carolinensis | -----MGEWavITGAGDGIGRAYSielAKRGLNIVLISRTFQKMQRVALDieQTTGQR    | 1p.2 | 2p.0 | 3p.2 |
| SDR12C2 | X. tropicalis   | -QSFFQSLGEWavVTGAGDGIGKAYSTelANRGMNIVMISRTLEKMQAVAMDieQSTGKN  | 1p.2 | 2p.0 | 3p.2 |
| SDR12C2 | D. rerio        | -EAFFTSLGKWavITGGSDDIGRAYAEelSKQGMSVIIISRNQEKLDRAAKKieLNTGGK  | 1p.2 | 2p.0 | 3p.2 |
| SDR12C3 | H. sapiens      | RADLIKQYGRWAVVsgATDGIGKAYAEELASRGLNIIILISRNEEKLQVVAKDIAPTYKVE | 1p.2 |      |      |
| SDR12C3 | P. troglodytes  | RADLIKQYGRWAVVsgATDGIGKAYAEELASRGLNIIILISRNEEKLQVVAKDIAPTYKVE | 1p.2 |      |      |
| SDR12C3 | M. musculus     | RPDLIKQYGRWAVIsgATDGIGKAYAEELASHGLNVILISQEEELQAAAKHIAPTYRVE   | 1p.2 |      |      |
| SDR12C3 | S. harrisii     | RADLIKQYGRWAVVsgATDGIGKAYAEELASRGLNIVLISQNEEKHLKLSKTLAETKYKVE | 1p.2 |      |      |
| SDR12C3 | G. gallus       | EIDIVKRYGRWAVvtgSTDGIGKAYAEELAKRGVNIILISRSKEKLEAVSRISSETYKVE  | 1p.2 |      |      |
| SDR12C3 | G. japonicus    | KADLVKLYGQWAVvtgGTSGIGKYYAKELASRKVNIIILVSRNQEKLALAREIADTYEVE  | 1p.2 |      |      |
| SDR12C3 | X. tropicalis   | RTNLGRQYGAWAVvtgATSGIAQAYAEELARCGMNVVLVDNNREKLQKMSDSITATHGVN  | 1p.2 |      |      |
| SDR12C3 | L. oculatus     | RRDLVHQYGQWAVVcgASDGLGRAYTEELAREGVSIIILISRSSEGLQSFAKAIADAYGVE | 1p.2 |      |      |
|         |                 | * * * * *                                                     |      |      |      |

|         |                |                                                              |      |      |
|---------|----------------|--------------------------------------------------------------|------|------|
| SDR12C1 | H. sapiens     | TRTIAVDFAS-EDIYDKIKTGLAGLEIGilvNNVGMSY-EYPEYFLDVPDLNvIKKMIN  | 4p.2 | 5p.0 |
| SDR12C1 | P. troglodytes | TRTIAVDFAS-EDIYDKIKTALAGLEIGilvNNVGMSY-EYPEYFLDVPDLNvIKKMIN  | 4p.2 | 5p.0 |
| SDR12C1 | M. musculus    | TRTIAVDFSL-DDIYDKIKTGLSGLEIGilvNNVGMSY-EYPEYFLEIPDLNdtIKKLIN | 4p.2 | 5p.0 |
| SDR12C1 | M. domestica   | TKTIAVDFGA-VDIYNKIEASLTGLEIGilvNNVGMSY-EYPEYFLDIPDLNdtINKLIN | 4p.2 | 5p.0 |

|         |                 |                                                               |      |      |
|---------|-----------------|---------------------------------------------------------------|------|------|
| SDR12C1 | Z. albicollis   | TKVIVADFGEREDIYNGIKTGLEGLEIGVlvNNVGISY-AYPEYFIDIPELEktIDKMVN  | 4p.2 | 5p.0 |
| SDR12C1 | A. carolinensis | TKTIVADFQDRETIYSKIKAGLEGLEIGilvNNVGVSy-SYPENFLDVPeldklIDNMIN  | 4p.2 | 5p.0 |
| SDR12C1 | X. tropicalis   | TKIIAADFGKPTeIYGRIESGLRDLEIGVlvNNVGVSy-EHPEYFLEIPDLEntLDKMIN  | 4p.2 | 5p.0 |
| SDR12C1 | P. latipinna    | TRTIAVDFVK-LDIYSKIEEGLADLEIGVlvNNVGVSy-PYPEYHLHIPNLenfITNTIN  | 4p.2 | 5p.0 |
| SDR12C2 | H. sapiens      | VKIIQADFTK-DDIYEHIEKLAGLEIGilvNNVGMLPNLLPSHFLNAPDEIqsL---IH   | 4p.2 | 5p.0 |
| SDR12C2 | P. troglodytes  | VKIIQADFTK-DDIYEHIEKLAGLEIGilvNNVGMLPNLLPSHFLNAPDEIqsL---IH   | 4p.2 | 5p.0 |
| SDR12C2 | M. musculus     | VKIVQADFTK-EDIYDHIEKLEGLEIGilvNNVGMLPSFFPSHFLSTSGESqnL---IH   | 4p.2 | 5p.0 |
| SDR12C2 | S. harrisii     | VKIIQADFTK-DDIYENIKESLQGLEIGilvNNVGMLPNLLPSHFLSGPDKIqnL---IH  | 4p.2 | 5p.0 |
| SDR12C2 | G. gallus       | VKVIQADFTK-NSVYKNIEKDLGLEIGVlvNNVGMLHNPLPCRFLNAPDVDenL---VN   | 4p.2 | 5p.0 |
| SDR12C2 | A. carolinensis | VKIIQADFTK-MDIYSDie-SLQGLEVGilvNNVGMLQTSIPCHFLDAPDNDqaL---IN  | 4p.2 | 5p.0 |
| SDR12C2 | X. tropicalis   | VKIIQADFTK-DNIYEHIEGLKGLKIGilvNNVGMLHNPDPCRFLSGPDNDknV---IN   | 4p.2 | 5p.0 |
| SDR12C2 | D. rerio        | VKVIAADFTK-DDIYGHITENIEGLDIGVlvNNVGILPSQIPCKLLETSDLEerIYDIVN  | 4p.2 | 5p.0 |
| SDR12C2 | H. sapiens      | TDIIVADFSSGREIYLPIREALKDKDIGilvNNVGVSy-PYPQYFTQLSE--DKLWDIIN  |      |      |
| SDR12C3 | P. troglodytes  | TDIIVADFSSGREIYLPIREALKDKDIGilvNNVGVSy-PYPQYFTQLSE--DKLWDIIN  |      |      |
| SDR12C3 | M. musculus     | TLVLVADFSSGREIYAPIREALRDRDIGilvNDVGAFY-PYPQYFSQVPE--DTLWDIVN  |      |      |
| SDR12C3 | S. harrisii     | TEIIVADFSSNGRGIYLLIREALQDRDIGilvNNVGVSy-PYPQYFTQVSE--EKLWDIID |      |      |
| SDR12C3 | G. gallus       | TDFIVADFSSGREAYQAIKEGLKDRDIGilvNNVGVSy-TYPDYFTNLSE--DMLWDMIN  |      |      |
| SDR12C3 | G. japonicus    | TAIIIVDFNKGSEIYPALKNVLEDKEIGilvNNVGVSy-THPDYFANLTW--DKIWELIN  |      |      |
| SDR12C3 | X. tropicalis   | TSFIEVDFCKGHEAYRPIKDALRHVEVGilvNCVGNFL-EYPQSVIECPE--EQLWKIIH  |      |      |
| SDR12C3 | L. oculatus     | TATIGADFSSQGEAYKPIKDAVKDKIEGILVNNICVPS-EYPQHFTNVPE--NKLWDIIN  |      |      |

    \*\*          \*                  \* \* \*          \*

+ +

|         |                 |                                                               |      |      |      |
|---------|-----------------|---------------------------------------------------------------|------|------|------|
| SDR12C1 | H. sapiens      | INILSVCKmTQLVLPGMVERsKGAILNISSGSMPLVPPLTIYSATktFVDFFSQCLHEE   | 6p.0 | 7p.1 | 8p.0 |
| SDR12C1 | P. troglodytes  | INILSVCKmTQLVLPGMVERsKGAILNISSGSMPLVPPLTIYSATktFVDFFSQCLHEE   | 6p.0 | 7p.1 | 8p.0 |
| SDR12C1 | M. musculus     | INVLSVCKvTRLVLPGMVERsKGVILNISSASGMLVPPLTIYSATkaFVDFFSQCLHEE   | 6p.0 | 7p.1 | 8p.0 |
| SDR12C1 | M. domestica    | INIFSVCKmTQLVLPGMVKrsKGAILNISSASGMLPAPPLTIYSATkaFVDFFSQCLHVE  | 6p.0 | 7p.1 | 8p.0 |
| SDR12C1 | Z. albicollis   | INIMSVCKmTRLVLPGMLErsKGIIILNIASAGMCPTPLLTLYSATkaFVDYFSRGLNAE  | 6p.0 | 7p.1 | 8p.0 |
| SDR12C1 | A. carolinensis | INCISVCKmTQLVLPGMVKrsKGVILNVNVSIAAVSPTPFLAVYSATkaFVNYFSHCLNVE | 6p.0 | 7p.1 | 8p.0 |
| SDR12C1 | X. tropicalis   | INITSVCKmTRLVLPGMGLGrRGVILNISSASGMYPVPLLTVYSATkaFVDFFSRGLQAE  | 6p.0 | 7p.1 | 8p.0 |
| SDR12C1 | P. latipinna    | VNMTSVCKmTRLVLPKMVArsKGVILNISSASGMYPVPLLTVYSATkaFVDFFSRGLHEE  | 6p.0 | 7p.1 | 8p.0 |
| SDR12C2 | H. sapiens      | CNITSVVkmTQLILKHMEsrqKGLILNISSGIALFPWPLYSMYSASkaFVCAFSKALQEE  | 6p.0 | 7p.1 | 8p.0 |
| SDR12C2 | P. troglodytes  | CNITSVVkmTQLILKHMEsrqKGLILNISSGIALFPWPLYSMYSASkaFVCAFSKALQEE  | 6p.0 | 7p.1 | 8p.0 |
| SDR12C2 | M. musculus     | CNITSVVkmTQLVLPKHMEsrqKGLILNISSGAALRPWPLYSLYSASkaFVYTFSKALSVE | 6p.0 | 7p.1 | 8p.0 |
| SDR12C2 | S. harrisii     | CNITSVVkmTRLILRDMEIrrKGLILNISSGAGRFPCLYSLYSSTkaFVCTFSKALQAE   | 6p.0 | 7p.1 | 8p.0 |
| SDR12C2 | G. gallus       | CNIISVTkmTQIILKQMElrqKGLILNLSSGLGTFPCPLYTIYSASkaFICTFSKALQAE  | 6p.0 | 7p.1 | 8p.0 |
| SDR12C2 | A. carolinensis | CNIMSVTqmTRIVLQKQMPPrqKGLILNISSavGTFPCPLYAIYSASkaFGCTFSKALQAE | 6p.0 | 7p.1 | 8p.0 |
| SDR12C2 | X. tropicalis   | CNITSTIkTRIILKQMEKrkSGLILNISSAVGRFPCLYAVYSASkaFVTTFSKALQAE    | 6p.0 | 7p.1 | 8p.0 |
| SDR12C2 | D. rerio        | CNVKSMVkmCRIVLPGMQQrrRGVILNVSSGIAKIPCIYTLYAAskvFVERFSQGLQAE   | 6p.0 | 7p.1 | 8p.0 |
| SDR12C3 | H. sapiens      | VNIAAASLMVHVLPGMVERKKGAIVTISGSCCKPTPQLAAFSASkaYLDHFSRALQYE    | 2p.0 |      |      |
| SDR12C3 | P. troglodytes  | VNIAAASLMVHVLPGMVERKKGAIVTISGSCCKPTPQLAAFSASkaYLDHFSRALQYE    | 2p.0 |      |      |
| SDR12C3 | M. musculus     | VNIAAASLMVHIVLPGMVVERKKGAIVTVSSGSCCKPTPQLAAFSASkaYLDHFSRALQYE | 2p.0 |      |      |
| SDR12C3 | S. harrisii     | VNIAAASLMVHIVLPGMVARRKGAIVNISSGSCCKPTPQMTAYSASkaYLDHFSRALQYE  | 2p.0 |      |      |
| SDR12C3 | G. gallus       | VNIAAATMMVHIVLPGMVVERKKGAIVNVSSASCCQPTPLMTTYGASKaYLDYFSRALYYE | 2p.0 |      |      |
| SDR12C3 | G. japonicus    | VNIGAATMMVHIVLPGMVVERKKGAIVNISSMSCCQPTPLMTAYSASkaYLDHFSRALHYE | 2p.0 |      |      |
| SDR12C3 | X. tropicalis   | VSVSAATIMAKIVVPGMAQRRRGAIVNVSSFRSCCKPNFPMTMYTPCqlYMDGFTKELQSE | 2p.0 |      |      |
| SDR12C3 | L. oculatus     | INIAAATMMVHIVLPGMVVERKKGAIVNISSGSCCKPTPKMTAYSASkaYLDHFSRALYYE | 2p.0 |      |      |

                  \*          \* \* \*          \*          \* \* \*

|         |                 |                                                               |      |
|---------|-----------------|---------------------------------------------------------------|------|
| SDR12C1 | H. sapiens      | YRSKGVFVqsVLPYFVATKLAKIRKP----TLDKPSPETFVKSAIKTVGLQSRTNGYLIH  | 9p.0 |
| SDR12C1 | P. troglodytes  | YRSKGVFVqsVLPYFVATKLAKIRKP----TLDKPSPETFVKSAIKTVGLQSRTNGYLIH  | 9p.0 |
| SDR12C1 | M. musculus     | YKSKGIFVqsVMPYLVATKLAKIQKP----TLDKPSAETFVKSAIKTVGLQTRTTGYVIH  | 9p.0 |
| SDR12C1 | M. domestica    | YRSKGIIVqsVLPYFVATKLAKIRKP----TFDKPSAEAFVRSIAIKTVGLQSRTNGYPVH | 9p.0 |
| SDR12C1 | Z. albicollis   | YKSKGIIVqsVLPYFVATKMSKIRKP----TLDKPSPERYVRAALGTVGLQSQTNGYLPH  | 9p.0 |
| SDR12C1 | A. carolinensis | YKRKGIIVqsLVPHLVVTNMSKLRKA---SRFRPMPGWVVKYIAINTVGLESETAGYPYH  | 9p.0 |

|         |                 |                                 |                                 |       |
|---------|-----------------|---------------------------------|---------------------------------|-------|
| SDR12C1 | X. tropicalis   | YRSKGVTVqsVLPFFYVATKLAKIRKP---- | TWDKPSPETVYQSALNTVGLQTQTNGYLPH  | 9p.0  |
| SDR12C1 | P. latipinna    | YRRQGIIIqsVLPFFVATKMTRIRKP----  | TLDKPTPERYVAAELNTVGLQNQTNGYFPH  | 9p.0  |
| SDR12C2 | H. sapiens      | YKAKEVIIqVLTPTYAVSTAMTKYLNT---- | NVITKTADEFVKESLNYVTIGGETCGCLAH  | 9p.0  |
| SDR12C2 | P. troglodytes  | YKAKEVIIqVLTPTYAVSTAMTKYLNT---- | NVITKTADEFVKESLNYVTIGGETCGCLAH  | 9p.0  |
| SDR12C2 | M. musculus     | YRDKGIIIIqVLTPTYISTPMTKYLNN---- | K-MTKTADEFVKESLKYVTIGAESCGLAH   | 9p.0  |
| SDR12C2 | S. harrisii     | YKEKGIIIIqVTPYSISTPMTKHINP----  | NKITKTADEFVKESLDFVAVGDETCGCLAH  | 9p.0  |
| SDR12C2 | G. gallus       | YKEKGIIIIqVVPYGIPTMTMHQKP----   | GLITKTAEEFVSES LHYVTFGDEIFGCLAH | 9p.0  |
| SDR12C2 | A. carolinensis | YNTKGIIIIqVTPYSVSTPMTKWSKP----  | NLINKTAEDFVRESLEYVTLGDETFGCLAH  | 9p.0  |
| SDR12C2 | X. tropicalis   | YKSKGIIIIqVTPYGVSTPMTRNART----  | NAITKRPVDFVRQSLNCVITGDETFGCFAH  | 9p.0  |
| SDR12C2 | D. rerio        | YISKGIIIIqtVAPFGVSTAMTGHQKP---- | DMVTFTAEEFVRSSLKYLKTGDQTYGSITH  | 9p.0  |
| SDR12C3 | H. sapiens      | YASKGIFVQSLIPFYVATSMTPSNSFLHRC  | SWLVSPKVVYAHHAVSTLGISKRTTGYWSH  |       |
| SDR12C3 | P. troglodytes  | YASKGIFVQSLIPFYVATSMTPASSFLHRC  | SWLVSPKVVYAHHAVSTLGISKRTTGYWSH  |       |
| SDR12C3 | M. musculus     | YASKGIFVQSLIPFYVTSSTGAAPASFLHRC | PWLAPSPRVYAQHAVSTLGISKRTTGYWSH  |       |
| SDR12C3 | S. harrisii     | YASKGIFVQSLIPFSVATNVKACRSFLHGC  | SWLVSPKVVYAHHA IATLGISKRTTGYWFH |       |
| SDR12C3 | G. gallus       | YASKGIFVQSLTPFVIATRMVSCSRVTSKR  | SEFFPSAEEYASHAISTLGLSKRTPGYWKH  |       |
| SDR12C3 | G. japonicus    | YAPQGIFVQSLIPFFISTNMTKFSKELTPK  | NFLVPSAEVYAHHAVTTLGISRRTTGYWLH  |       |
| SDR12C3 | X. tropicalis   | LSSKGIFVQSLTPLCAKERTLHYRPSFRFP  | FLVPSPEVYARHAVQMLGVSHRTTGYWAH   |       |
| SDR12C3 | L. oculatus     | YASKGVFVQSLVPFYISEVGAAS-----    | GGWLVPHPQVYARHAISTLGISHRTTGYWPH |       |
|         |                 | * * * * *                       |                                 |       |
| SDR12C1 | H. sapiens      | ALmgSIIS-NLPSWIY LKIVMNMNK-STR  | AHYLKKTKKN-----                 | 10p.0 |
| SDR12C1 | P. troglodytes  | ALmgSIIS-NLPSWIY LKIVMNMNK-STR  | AHYLKKTKKN-----                 | 10p.0 |
| SDR12C1 | M. musculus     | SLmgSINS-IMPRWYFKIIMGFSK-SLRN   | RYLKKRKKKN-----                 | 10p.0 |
| SDR12C1 | M. domestica    | AImgWFLSCLLP SWLSMKLAYSVNK-GS   | AHYLKKHKKA-----                 | 10p.0 |
| SDR12C1 | Z. albicollis   | ALmgWVIS-LLPTSTAINLIMKTNK-QIR   | ARYFKMKKEK-----                 | 10p.0 |
| SDR12C1 | A. carolinensis | ELwvWLIH-MLPRWVVDSEATRLAV-KS    | YNLLKKQKAN-----                 | 10p.0 |
| SDR12C1 | X. tropicalis   | AIwiWISTSLVPVSTAISLGMMKNK-GL    | RARFLKRAKQK-----                | 10p.0 |
| SDR12C1 | P. latipinna    | AVmgWVTTRLVPSSIVIFLGARMNR-LQ    | RTGYLHRRKLREQRNGASLKTE          | 10p.0 |
| SDR12C2 | H. sapiens      | EIIaGFLS-LIPAWAFYSGAFQRLLLTH    | YVAYLKLNTKVR-----               | 10p.0 |
| SDR12C2 | P. troglodytes  | EIIaGFLS-LIPAWAFYSGAFQRLLLTH    | YVAYLKLNTKVR-----               | 10p.0 |
| SDR12C2 | M. musculus     | EIIaIILN-RIPSRIFYSSTAQRFLLTR    | YSDYLKRNISNR-----               | 10p.0 |
| SDR12C2 | S. harrisii     | EIIaHLLD-FIPSWVIYSDLAQNI FLI    | HCTNYLQNSNIQ-----               | 10p.0 |
| SDR12C2 | G. gallus       | ELlaCVLQ-LVPLWVLHSDRLQEVALQ     | AFTSYLKKRWKRS-----              | 10p.0 |
| SDR12C2 | A. carolinensis | EIIaRLVQ-CIPLWIFHSESVQNMLKDA    | ISGQLKKNSNST-----               | 10p.0 |
| SDR12C2 | X. tropicalis   | AVlgCIMD-CIPLWVIHSTAVQEKFLH     | RFRNKKKKKI-----                 | 10p.0 |
| SDR12C2 | D. rerio        | TLlgRIVQ-SIPTWVLQSETFQHFFQ---   | EYVKNRDRR-----                  | 10p.0 |
| SDR12C3 | H. sapiens      | SIqfLFAQ-YMPEWLWVWGANILNRS      | LRKEALSCTA-----                 | 3p.0  |
| SDR12C3 | P. troglodytes  | SIqfLFAQ-YMPEWLWVWGANILNRS      | LRKEALSCTA-----                 | 3p.0  |
| SDR12C3 | M. musculus     | SIqfLFAQ-YMPEWLWVWGANLLNRS      | LRKEALSCQA-----                 | 3p.0  |
| SDR12C3 | S. harrisii     | SIqfLFAQ-YMPEWLWAWGANI INNS     | LRHEALSHRL-----                 | 3p.0  |
| SDR12C3 | G. gallus       | SIefTLGE-RLPEWIWAWFAQYFCRI      | IRKEALTHKAK-----                | 3p.0  |
| SDR12C3 | G. japonicus    | TIlfLLGQ-YIPEWLWAWGTYRMNNT      | LRLEATLQGPH-----                | 3p.0  |
| SDR12C3 | X. tropicalis   | SMqlAAAC-WLPDFICQLMGRFLHTASE    | -----                           | 3p.0  |
| SDR12C3 | L. oculatus     | SIqfWLSR-YMPEWMWVWGSNMLSRTI     | -----                           | 3p.0  |
|         |                 | *                               |                                 |       |

Figure S17. Alignment of the vertebrate SDR12C family variants. For further details see Fig. S13 and Table S17.

\* symbol marks the position of identical amino acid residues of the aligned SDR protein sequences.



x     x     x

```

SDR16C1 H. sapiens      ---MVWKRLGALVMFPLQMIYLVVKAAGVGLVLPAPKLRDLSRENVLITGGGRGIGRQLARE
SDR16C1 P. troglodytes ---MVWKRLGALVMFPLQMIYLVVKAAGVGLVLPAPKLRDLSRENVLITGGGRGIGRQLARE
SDR16C1 M. musculus     ---MVWKWLGA LVVFPLQMIYLVTKAAVGMVLPPKLRDLSRESVLITGGGRGIGRHLARE
SDR16C1 G. gallus       ---MVWKWLGA VLLLVPQMLYLVLKAAVCALLPPKLRDLSGDAVLVTGGGRGIGRQLAKE
SDR16C1 G. japonicus    ---MVWKWLA AWWLLLPVQLLGLVAKALVGTLLPSKLRDLSGDSVLITGGGRGIGRHLARE
SDR16C1 X. tropicalis   ---MDMRSVGRLLLPVQMLFAILKAAANLLMPTRLRDLSDGDTVLTITGGGRGIGRHLARE
SDR16C1 D. rerio        ---MEMKVLGCALLFPFQIVFSILKATVRFTRQKRRDLGTDVVLTITGGGRGIGRHLAKE
SDR16C2 H. sapiens      -MKF----LLDILLLLPLLI VCSLESFVKLFIPKRRKSVTGEIVLITGAGHGIGRLTAYE
SDR16C2 P. troglodytes -MKF----LLDILLLLPLLI VCSLESFVKLFIPKRRKSVTGEIVLITGAGHGIGRLTAYE
SDR16C2 M. musculus     -MKY----LLDLILLPLLI VFSIESLVKLFIPKKKKS VAGEIVLITGAGHGIGRLTAYE
SDR16C2 S. harrisii     -MYV----VLELLLLLPIL IYSTLESFVKFFIPKRRKSVS GEIVLITGAGHGIGRLTAYE
SDR16C2 G. gallus       -MNP----ALGLLVFLGTLL YAYAEALVKLLPAPKRKAVRGELVLVTGAARGLGRATARE
SDR16C2 A. mississippiensis -MHT----ALELLRLLP LLLLAYLEALARLLPPRRKSVQGETVLVTGAGHGLGRSTALE
SDR16C2 X. tropicalis -MHV----LLEIVWLLLVIVSY SLESFVKLFIPKRRKSVKGEVVLITGAGHGIGKITAQI
SDR16C3 H. sapiens      -MNI----ILEI LLLLITIIYSY LESLVKFFIPQRRKSVAGEIVLITGAGHGIGRQT TYE
SDR16C3 P. troglodytes -MNI----ILEI LLLLITIIYSY LESLVKFFIPQRRKSVAGEIVLITGAGHGIGRQT TYE
SDR16C3 M. musculus     -MNL----ILEF LLLVGVI IYSY LESLVKFFIPRRRKS SVTGQTVLITGAGHGIGRLTAYE
SDR16C3 S. harrisii     -MNI----IAEL FLLLAIV IYSY LEALVRLFIPVRRKSVS GEIVLITGAGHGIGRLTAYE
SDR16C3 F. albicollis    -MNV----FVEL LLLFLAT LLYSY LEAFVKLFVPARRKSLSGELVLITGAGHGVGRATALE
SDR16C3 A. carolinensis -----MYSCLEALVKLFIPK NRKSVYGEIVLITGAGHGLGRATAYE
SDR16C3 X. tropicalis -MNI----ILEYMFLLFI AVSYMESFVKLFIPVNRKSVAGNIVLITGSGHGIGRR TALE
SDR16C4 H. sapiens      -MNI----VVEFFV VTFKVLWAFV LAAARWLVRPKEKSVAGQVCLITGAGSGLGR LFALE
SDR16C4 P. troglodytes -MNI----VVEFFV VTFKVLWAFV LAAARWLVRPKEKSVAGQVCLITGAGSGLGR LFALE
SDR16C4 M. musculus     -MNI----VVEFFV VTFKVLWAFV LAAARWLVRPKEKSVAGQVCLITGAGSGLGR LFALE
SDR16C4 M. domestica    -MNI----VVEFFV VTFKVLWAFV LAAAKWLVRPKEKSVAGQVCLITGAGSGLGR LFALE
SDR16C4 G. gallus       -MNI----LLELFV VTFRVLWAFV LAAAKWLVRPKEKSVAGQVCLITGAGSGLGR LFALE
SDR16C4 G. japonicus    -MNI----LEEFFV VTFKVLWAFV VAAAKWFM RPKEKSVAGQVCLITGAGSGLGR LFALE
SDR16C4 X. tropicalis -MHI----VLEFFL VTFKVLWAFV LAAAKWLVRPKDKSVAGQVCLITGAGSGLGR LFALE
SDR16C4 P. latipinna    MMMI----IAEFFV VILKVLWAFV TAGARWVVRPKEKSVTGQVCVITGAGSGLGR LFAKE
SDR16C5 H. sapiens      -MSFNLQSSKKLFI FLGKSLFS LLEAMI FALLPKPRKNVAGEIVLITGAGSGLGR L LALQ
SDR16C5 P. troglodytes -MSFNLQSSKKLFI FLGKSLFS LLEAMI FALLPKPRKNVAGEIVLITGAGSGLGR L LALQ
SDR16C5 M. musculus     -MSQNL ES VKNLLVFLGKSL LSVLEALLFHVISKPRKNVAGEIVLITGAGSGLGR L LALQ
SDR16C5 M. domestica    -MLSKMNDLNLHLLIF LKGFTYGFLEALFYMIAPKPKKNVSGEIVLITGAGSGIGR L LALR
SDR16C5 G. gallus       -MNF----FLELLK VIGLTTYM LEALVLLFVPKRKKNVSGEIVLITGAGSGIGR L LSLK
SDR16C5 P. bivittatus   -MNF----FLET LR VILMCIY LL EFL- SFIFARKKNIAGEIVLITGAGSGIGR L MALK
SDR16C5 X. tropicalis -MNI----FLET LK VFLTIY LNLESFV LWFIPSRKKNVAGEIVLITGAGSGIGR L MALE
SDR16C5 D. rerio (a)    -MNI----LLET LR LI FLT VYYNLEA FLKFFIPLRKKDVS GEIVLITGSGSGIGR L MALE
SDR16C5 D. rerio (b)    -MNF----LLET LR VL FLSLVLGLEAFVRLFIPPRKKNVSGELVLITGAGSGIGR L MALE

```

\* \* \*

|                             |                                      |      |      |
|-----------------------------|--------------------------------------|------|------|
| SDR16C1 H. sapiens          | FAERGARKiVLWGRTEKCLKETTEEIRQMG-----  | TECH | 1p.0 |
| SDR16C1 P. troglodytes      | FAERGARKiVLWGRTEKCLKETTEEIRQMG-----  | TECH | 1p.0 |
| SDR16C1 M. musculus         | FAERGARKiVLWGRTEKCLKETTEEIRQMG-----  | TECH | 1p.0 |
| SDR16C1 G. japonicus        | FAKRGARKvILWGRTEKCLKETTEEIRVMG-----  | TECY | 1p.0 |
| SDR16C1 G. gallus           | FARRGARKiILWGRTEKCLKETTEEIRMMG-----  | TECH | 1p.0 |
| SDR16C1 D. rerio            | FAKQGARKvILWGRTEKCLKETCEEISMTG-----  | TECH | 1p.0 |
| SDR16C1 X. tropicalis       | FAKQNAKkiILWGRTERCLKETTEEIKQMG-----  | TDCH | 1p.0 |
| SDR16C2 H. sapiens          | FAKLKSK-LVLWDINKhGLEETAACKCKGLG----- | AKVH | 1p.0 |
| SDR16C2 P. troglodytes      | FAKLKSK-LVLWDINKhGLEETAACKCKGLG----- | AKVH | 1p.0 |
| SDR16C2 M. musculus         | FAKLNTK-LVLWDINKhGIEETAACKCRKLG----- | AQAH | 1p.0 |
| SDR16C2 S. harrisii         | FAKLKSK-LVLWDINKhGIEETAACCRKLG-----  | ARAH | 1p.0 |
| SDR16C2 G. gallus           | FARRQSR-LVLWDVEahGLKETATECEGLG-----  | ATVH | 1p.0 |
| SDR16C2 A. mississippiensis | FAQHRSR-LVLWDVNqhGIEETAACQRLG-----   | ATVH | 1p.0 |

|         |                 |                                                               |      |
|---------|-----------------|---------------------------------------------------------------|------|
| SDR16C2 | X. tropicalis   | FGELESV-LVLWDINKqGVEETAAEKCRKGG-----AKVY                      | 1p.0 |
| SDR16C3 | H. sapiens      | FAKRQSI-LVLWDINKrGVEETAAECKRLG-----VTAH                       | 1p.0 |
| SDR16C3 | P. troglodytes  | FSKQQSI-LVLWDINKrGVEETAAECKRLG-----VTAH                       | 1p.0 |
| SDR16C3 | M. musculus     | FAKQKSR-LVLWDINKrGVEETADKCRKL-----AVVH                        | 1p.0 |
| SDR16C3 | S. harrisi      | FAKHKSK-LVLWDINKhGIEETAAECKRLG-----APTH                       | 1p.0 |
| SDR16C3 | F. albicollis   | FARRQSR-LVLWDINKhGVEETAECQKLG-----ATVQ                        | 1p.0 |
| SDR16C3 | A. carolinensis | FAKRQSV-LVLWDINKqGVEETAECCKRLG-----AIAH                       | 1p.0 |
| SDR16C3 | X. tropicalis   | FAKHESI-LVLWDINKqGVEETADECKRLG-----ATAY                       | 1p.0 |
| SDR16C4 | H. sapiens      | FARRRAL-LVLWDINTQSNEETAGMVRHIYRDLEAAD-AAALqaGNNGEEEILPHCNLQVF | 1p.2 |
| SDR16C4 | P. troglodytes  | FARRRAL-LVLWDINTQSNEETAGMVRHIYRDLEAAD-AAALqaGNNGEEEILPHCNLQVF | 1p.2 |
| SDR16C4 | M. musculus     | FARRRAL-LVLWDINTQSNEETAGMVRHIYRDLEAAD-AAALqaGNNGEEEILPPCNLQVF | 1p.2 |
| SDR16C4 | M. domestica    | FARRRAL-LVLWDINTQSNEETAGMVRHIYQDLEAAD-AAALqaGNNGEEVLPPCNLQVF  | 1p.2 |
| SDR16C4 | G. gallus       | FARRRAL-LVLWDINTQSNEETAGMVRHIYRELAEE---AAPkvAGDGEKDALPHCSLQVY | 1p.2 |
| SDR16C4 | G. japonicus    | FARRRAR-LVLWDINTQSNEAQAGMVRHIYREVAEEAAAAAQAkAGHGEEEVLPHYNLQVH | 1p.2 |
| SDR16C4 | X. tropicalis   | FARRRAQ-LVLWDINSQSNEETAEMVRSIYRELAEDSAR-raGNATEEEVQPCCNFQVY   | 1p.2 |
| SDR16C4 | P. latipinna    | FARRRAV-LVLWDINSQSNEETAEMVRQIYHETETPIA---KdgpVGGVEEVPAFQPQVY  | 1p.2 |
| SDR16C5 | H. sapiens      | FARLGSV-LVLWDINKEGNEETCKMAREAG-----ATRVH                      |      |
| SDR16C5 | P. troglodytes  | FARLGSV-LVLWDINKEGNEETCKMAREAG-----ATRVH                      |      |
| SDR16C5 | M. musculus     | FARLGAV-LVLWDVNKEANDETHQLAREAG-----AARVH                      |      |
| SDR16C5 | M. domestica    | FAHLGAT-LVLWDINPEGNQETSCLAKEAG-----ASRVY                      |      |
| SDR16C5 | G. gallus       | FAKLGAT-LVLWDINQDGLKETLRLAEENG-----AVRIH                      |      |
| SDR16C5 | P. bivitatus    | FARLGAV-LVLWDVNLGNKETARLACKIG-----AARVH                       |      |
| SDR16C5 | X. tropicalis   | FAHLGAT-LVLWDINEEGNKETCRLAKKNG-----AVRVH                      |      |
| SDR16C5 | D. rerio (a)    | FASLDVS-LVLWDINVDGLKETAEQVKEKG-----ASRVH                      |      |
| SDR16C5 | D. rerio (b)    | FARLDAR-LVLWDINEDGNKETARLIKEKY-----GARAH                      |      |
|         |                 | *          **                                                 |      |

|         |                     |                                                               |      |
|---------|---------------------|---------------------------------------------------------------|------|
| SDR16C1 | H. sapiens          | YFICDVGNREEVYQTAKAVREkvGDITILVNNAAVVHGKSLMDSDDDALLKSHINTLGQ   | 2p.0 |
| SDR16C1 | P. troglodytes      | YFICDVGNREEVYQTAKAVREkvGDITILVNNAAVVHGKSLMDSDDDALLKSHINTLGQ   | 2p.0 |
| SDR16C1 | M. musculus         | YFICDVGNREEVYQMAKAVREkvGDITILVNNAAVVHGKSLMDSDDDALLKSHVNTLGQ   | 2p.0 |
| SDR16C1 | G. gallus           | YFICDVGNREEVYRQAKAVREkvGDITILVNNAAVVHGKSLMDSDDDALLKSHINTLGQ   | 2p.0 |
| SDR16C1 | G. japonicus        | YFICDVGNREEVYQQAkAVREkvGDITILVNNAAVVHGKSLMESDDDALLKSHINTLGQ   | 2p.0 |
| SDR16C1 | X. tropicalis       | YFVCDVGNREEVYQQAkAVREkvGDVTILVNNAAVVHGKSLMDSDDDALLKSHINTLGQ   | 2p.0 |
| SDR16C1 | D. rerio            | YFVCDVGNREEVYQQAkAVREkvGDVTILVNNAAVVHGKSLMESDDDALLKTHINTLGQ   | 2p.0 |
| SDR16C2 | H. sapiens          | TFVVDCSNREDIYSSAKkvKAEIGDVSILVNNAGVVYTSDFATQDPQIEKTFEENVLAH   | 2p.0 |
| SDR16C2 | P. troglodytes      | TFVVDCSNREDIYSSAKkvKAEIGDVSILVNNAGVVYTSDFATQDPQIEKTFEENVLAH   | 2p.0 |
| SDR16C2 | M. musculus         | PFVVDCSQREEIYSSAKkvKEEVGDVSILVNNAGVVYTADLFATQDPQIEKTFEENVLAH  | 2p.0 |
| SDR16C2 | S. harrisi          | AYVVDCSNKEDIYNYAKkvKAEVGDVSILVNNAGVVYTADLFSTQDPQIEKTFEENVLAH  | 2p.0 |
| SDR16C2 | G. gallus           | TLVVDCSKREEIYSAAEkvKKDIGDVSILVNNAGVITAADLLSTQDHQIEKMFENVILAH  | 2p.0 |
| SDR16C2 | A. mississippiensis | TFVVDCSKREEIYRAAEkvKKEIGDISILVNNAGVITPADLLSTQDHQIEQTFAVNILAH  | 2p.0 |
| SDR16C2 | X. tropicalis       | TYVVDCSKREEINTAANKvkQEVGDVTILINNAGIIFCADVLTLDQDQIEKIFENVILAH  | 2p.0 |
| SDR16C3 | H. sapiens          | AYVVDCSNREEIYRSLNqvkKEVGDTVIVVNNAGTVYPADLLSTKDEEITKTFEVNILGH  | 2p.0 |
| SDR16C3 | P. troglodytes      | AYVVDCSNREEIYRSLNqvkKEVGDTVIVVNNAGTVYPADLLSTKDEEITKTFEVNILGH  | 2p.0 |
| SDR16C3 | M. musculus         | VFVVDCSNRAEIYNSVDqvkREVGDVEIVVNNAGAIYPADLLSAKDEEITKTFEVNILGH  | 2p.0 |
| SDR16C3 | S. harrisi          | AFVVDCSKKEEITYSMIDkiKKEVGDTVIVVNNAGTIYPADLLSTKDEEITKTFEVNILGH | 2p.0 |
| SDR16C3 | F. albicollis       | TFVVDCSKREEIYSTADkvKKDIGDVTILVNNVGIITAADFLSTQDHQIEKMFENVILGH  | 2p.0 |
| SDR16C3 | A. carolinensis     | ALVVNCKNREEITYTVADkvKKDIGDVSILVNNAGVITAKLLSTKDEQIQEMFDVNLAH   | 2p.0 |
| SDR16C3 | X. tropicalis       | AFVVDCSTRNDIYRCAEkvKQDIGDVIDILINNAGVVFGEFLKLQDHQIEKTFSVNLAH   | 2p.0 |
| SDR16C4 | H. sapiens          | TYTCDVGKRENVYLTAERVVRKEVGEVSVLVNNAGVVSghHLLCEPDELIERTMMVNCHAH |      |
| SDR16C4 | P. troglodytes      | TYTCDVGKRENVYLTAERVVRKEVGEVSVLVNNAGVVSghHLLCEPDELIERTMMVNCHAH |      |
| SDR16C4 | M. musculus         | TYTCDVGKRENVYLTAERVVRKEVGEVSVLVNNAGVVSghHLLCEPDELIERTMMVNCHAH |      |
| SDR16C4 | M. domestica        | TYTCDVGKRENVYLTAERVVRKEVGEVSVLVNNAGVVSghHLLCEPDELIERTMMVNCHAH |      |
| SDR16C4 | G. gallus           | TYTCDVGKRENVYTtaERVVRKEVGEVSVLVNNAGVVSghHLLCEPDELIERTMMVNCHAH |      |
| SDR16C4 | G. japonicus        | TYTCDVSKRENVYTtaERVVRKEVGEVSVLVNNAGVVSghHLLCEPDELIERTMMVNCHAH |      |
| SDR16C4 | X. tropicalis       | TYTCDVGKRESVYSTAEKVRREVGEVDILINNAGVVSghHLLCEPDELIERTMMVNCHAH  |      |
| SDR16C4 | P. latipinna        | TYVCDVGKRESVYSTAEKVRREVGEVDILINNAGVVSghHLLCEPDELIERTMMVNCHAH  |      |



|         |                     |                                                                 |      |
|---------|---------------------|-----------------------------------------------------------------|------|
| SDR16C1 | G. japonicus        | PGVNATTVLPHFTSTEMFQGMRIrfPN--LFPPLKPEVVARRTVEAVQQNQAFLLLPWTM    | 4p.1 |
| SDR16C1 | X. tropicalis       | PGVNATTVLPHFTNTSTEMFQGMVRrfPN--LFPPLKPETVATKTVEAVQKNKAFLLLPWTM  | 4p.1 |
| SDR16C1 | D. rerio            | PGVGCTTVLPFHTDTSTEMFQGMVRrfPK--LFPPLNPENVAERTVDVARTNTAFVVLFPWTM | 4p.1 |
| SDR16C2 | H. sapiens          | TGVKTTCLCPNFVNTGFIKNPSTslGP-----TLEPEEVVNRLMHGILTEQKMIFIPSSI    | 5p.1 |
| SDR16C2 | P. troglodytes      | TGVKTTCLCPNFVNTGFIKNPSTslGP-----TLEPEEVVNRLMHGILTEQKMIFIPSSI    | 5p.1 |
| SDR16C2 | M. musculus         | TGVRTSCLCPNFINTGFIKNPSTnlGP-----TLEPEEVVEHLMHGILTEQKMIFVPSSI    | 5p.1 |
| SDR16C2 | S. harrisii         | NGIKTSCLCPNFINTGFIKNPNSrflP-----TLEPEEVVNKLMKGILTEQKMIFVPSSL    | 5p.1 |
| SDR16C2 | G. gallus           | DGIKTTCLCPVFMTGFKVKNPSTrlGK-----ILEVDEVVKALMEGILTNOKMVFVPPQL    | 5p.1 |
| SDR16C2 | A. mississippiensis | DGIKTTCLCPFINTGFVNKPKMr1TP-----ILEPDMVAKKLLLEGILINQKMIFVPSSL    | 5p.1 |
| SDR16C2 | X. tropicalis       | SGIKTSCLCPVFVDTGFVKNPSLrlAP-----VLQPEEVAQTLVDGILINKKMICVPSSV    | 5p.1 |
| SDR16C3 | H. sapiens          | TGIKTSCLCPVFVNTGFTKNPSTrlWP-----VLETDEVVRSIDGILTNNKMI FVPSYI    | 5p.1 |
| SDR16C3 | P. troglodytes      | TGIKTSCLCPVFVNTGFTKNPSTrlWP-----VLETDEVVRSIDGILTNNKMI FVPSYT    | 5p.1 |
| SDR16C3 | M. musculus         | TGIQTSCLCPVFVNTGFTKNPSTrlWP-----VLEPEEVARSLINGILTNNKMI FVPSYI   | 5p.1 |
| SDR16C3 | S. harrisii         | NGIKTSCLCPVFVNTGFTKNPSTrlWP-----ILETDDVVRKLMGILTDKKMI FVPSYL    | 5p.1 |
| SDR16C3 | F. albicollis       | DGIKTTCLCPVFINTGFVKNPSTrlGK-----ILEIEEVVETLMGIVTNKKMVFPVPPNQ    | 5p.1 |
| SDR16C3 | A. carolinensis     | DGIQMTCLCPSIINTGFLKISKTLiLP-----VLKAEDTAKDLMGILTNOKIVFSPPPWA    | 5p.1 |
| SDR16C3 | X. tropicalis       | DGVKTTCLCPVFVNTGFVNPSTrvWP-----VLKTEDVVKCLMEGILTNNKMI IVPSSV    | 5p.1 |
| SDR16C4 | H. sapiens          | DGIKTTLVCPYLVDTGMRGCRlrkeIEPFLPPLKPDYCVKQAMKAILTDQPMICTPRLM     | 4p.1 |
| SDR16C4 | P. troglodytes      | DGIKTTLVCPYLVDTGMRGCRlrkeIEPFLPPLKPDYCVKQAMKAILTDQPMICTPRLM     | 4p.1 |
| SDR16C4 | M. musculus         | DGIKTTLVCPYLVDTGMRGCRlrkeIEPFLPPLKPDYCVKQAMRAILTDQPMVCTPRLM     | 4p.1 |
| SDR16C4 | G. gallus           | DGIKTTLVCPYLVDTGMRGCRlrkeIEPFLPPLKPEYCVKQAMRAILTDQPMICTPRLM     | 4p.1 |
| SDR16C4 | M. domestica        | DGIKTTLVCPYLVDTGMRGCRlrkeIEPFLPPLKPDYCVKQAMKAILTDQPMICTPRLM     | 4p.1 |
| SDR16C4 | G. japonicus        | DGIKTTLVCPYLVDTGMRGCRlrkeIEPFLPPLKPDYCVKQAMRAILTDQPMICTPRLM     | 4p.1 |
| SDR16C4 | X. tropicalis       | DGIKTTLVCPYLVDTGMRGCRlrkeIEPFLPPLKPDYCVKQAMRAILTDQPMICTPRLM     | 4p.1 |
| SDR16C4 | P. latipinna        | DGINMTLVCPYLVTGMFGKCRlrkeIEPFLPPLSPDFCVKQAMRAILTDQPMVCTPRII     | 4p.1 |
| SDR16C5 | H. sapiens          | KGIKTTIVCPFFIKTGMFEGCTTgcPS--LLPILEPKYAVEKIVEAILQEKMVLYMPKLL    | 4p.1 |
| SDR16C5 | P. troglodytes      | KGIKTTIVCPFFIKTGMFEGCTTgcPS--LLPILEPKYAVEKIVEAILQEKMVLYMPKLL    | 4p.1 |
| SDR16C5 | M. musculus         | WGIKTTIVCPFFIKTGMFEGCTTkcPT--LLPILDPEYAVRKIIDAILQEQLYLYMPKFL    | 4p.1 |
| SDR16C5 | M. domestica        | TGIKTTIVCPFFIKTGMFEGCTTanSH--LLPILEPKYVVDKIMDAILTEQVYLYLPKFL    | 4p.1 |
| SDR16C5 | G. gallus           | TGVKTTTVCPYFINTGMFEGCSTkvSL--LLPILEPEYVAEKTMTAIRRDEPILLPRSL     | 4p.1 |
| SDR16C5 | P. bivittatus       | NGIKSTIVCPYLVTGMFDGCETkwPC--LLPIINPEYAAERIVSGILRNERYILMPRVL     | 4p.1 |
| SDR16C5 | X. tropicalis       | TGIKTTIVCPYFINTGMFDGCSTkvPR--LLPILEAEYASKKIVDAILKDQVYLVMPRSL    | 4p.1 |
| SDR16C5 | D. rerio (a)        | DGIKTTIVCPFLINTGLFDGCGTkwPL--LMPMLEPDYVAKRIVSAILTDQVVFLLPRSL    | 4p.1 |
| SDR16C5 | D. rerio (b)        | DGVKTTIVCPFFINTGMFDGANTkwPR--LMPILDPDYACRKIVDAIRREQVYLYMPRSI    | 4p.1 |

\* \* \* \*

|         |                     |                                              |      |
|---------|---------------------|----------------------------------------------|------|
| SDR16C1 | H. sapiens          | HALVILKsIlPQAALeeIHkFSGTYTCMNTFKGRT-----     | 5p.1 |
| SDR16C1 | P. troglodytes      | HALVILKsIlPQAALeeIHkFSGTYTCMNTFKGRT-----     | 5p.1 |
| SDR16C1 | M. musculus         | NILIIlKsIlPQAALeeIHrFSGTYTCMNTFKGRT-----     | 5p.1 |
| SDR16C1 | G. japonicus        | HILIIlKsIlPQAALeeIHkFSGSYTCMNTFKGRT-----     | 5p.1 |
| SDR16C1 | G. gallus           | NVLVILKsIlPQAALeeIHkFSGSYTCMNTFKGRT-----     | 5p.1 |
| SDR16C1 | X. tropicalis       | HALVILKsIlPQSAleeeIHrFSGAYTCMNTFKGRT-----    | 5p.1 |
| SDR16C1 | D. rerio            | HFLVILKsIlPQSAleeeIHkFSGSYTCMNTFKGRT-----    | 5p.1 |
| SDR16C2 | H. sapiens          | AFLTTLERiLPERFLAVLKRKISVK-F-DAVIGYKMAQ-----  | 6p.1 |
| SDR16C2 | P. troglodytes      | AFLTTLERiLPERFLAVLKRKISVK-F-DAVIGYKMAQ-----  | 6p.1 |
| SDR16C2 | M. musculus         | ALLTVLEriVPERFLQVLKHRINVK-F-DAVVGyKDK-----   | 6p.1 |
| SDR16C2 | S. harrisii         | SVITLLERiFPERFQKALRRIFNIK-F-DAVIAfKNKTQ----- | 6p.1 |
| SDR16C2 | G. gallus           | SFALLSEmLiPERASNVLKKLTdVK-F-DAVVGHGSNQ-----  | 6p.1 |
| SDR16C2 | X. tropicalis       | SLVPVLAfFLPERALNALNEFQNLK-F-EAKVHSRDKDK----- | 6p.1 |
| SDR16C2 | A. mississippiensis | NIFLFMEkiLPERALAawnKLQAIQ-F-DKVVGYRNKE-----  | 6p.1 |
| SDR16C3 | H. sapiens          | NIFLRLQkfLPERASAILNRMQNIQ-F-EAVVGhKIKMK----- | 6p.1 |
| SDR16C3 | P. troglodytes      | NIFLRLQkfLPERASAILNRMQNIQ-F-EAVVGhKIKMK----- | 6p.1 |
| SDR16C3 | M. musculus         | NISLILEkfLPERALKAISRIQNIQ-F-EAIVGHKTkMK----- | 6p.1 |
| SDR16C3 | S. harrisii         | NFCLVLEkfLPERALAAINRVQNIQ-F-EAVVSyKHhKN----- | 6p.1 |
| SDR16C3 | F. albicollis       | SVALLLervFPERALNLLKKMSEVK-F-DAVIGQRSTQ-----  | 6p.1 |
| SDR16C3 | A. carolinensis     | KIIVVSSkfLPERACNAILDTEKSN-Y-HKLLQ-----       | 6p.1 |

|         |                |                                                  |      |
|---------|----------------|--------------------------------------------------|------|
| SDR16C3 | X. tropicalis  | KYSLIMNqfLPERVIATMTKMQDIQ-F-STPYRCDKKED-----     | 6p.1 |
| SDR16C4 | H. sapiens     | YIVTFMKsiLPFEAVVCMYRFLGADKCMYPFIAQRKQATNNNEAKNGI | 5p.1 |
| SDR16C4 | P. troglodytes | YIVTFMKsiLPFEAVVCMYRFLGADKCMYPFIAQRKQATNNNEAKNGI | 5p.1 |
| SDR16C4 | M. musculus    | YIVTFMKsiLPFEAVVCMYRFLGADKCMYPFIAQRKQATNNNEAKNGI | 5p.1 |
| SDR16C4 | M. domestica   | YIVTFMKsiLPFEAVVCMYRFLGADKCMYPFIAQRKQATNNNEAKNGI | 5p.1 |
| SDR16C4 | G. gallus      | YMVTFMKsiLPFEAVVCMYRFLGADKCMYPFIAQRKQATNNNEAKNGI | 5p.1 |
| SDR16C4 | G. japonicus   | YMVTFMKsiLPFEAVVCMYRFLGADKCMYPFIAQRKQATNNNEAKNGI | 5p.1 |
| SDR16C4 | X. tropicalis  | YIVTCMKsiLPFEAVVCMYRFLGADKCMYPFIAQRKQATNNNEAKNGI | 5p.1 |
| SDR16C4 | P. latipinna   | YMVNFMKsiLPFEAIVCMYRFLGADKCMYPFLAQRKEAMNNNEAKNGI | 5p.1 |
| SDR16C5 | H. sapiens     | YFMMFLKs fLPLKTGLLIADYLGILHAMDG FVDQKKKL-----    | 5p.1 |
| SDR16C5 | P. troglodytes | YFMMFLKs fLPLKTVLLIADYLGILHAMDG FVDQKKKL-----    | 5p.1 |
| SDR16C5 | M. musculus    | YFIVFLKs iLPIKTGILIADYLG V FHMTEGFTGQKKKT-----   | 5p.1 |
| SDR16C5 | M. domestica   | YYALFLKs fLPAKSGVAVCEYMKIFDVMNSFQGLKKF-----      | 5p.1 |
| SDR16C5 | G. gallus      | YFFLALKniLPVKVG VLLAD FVGALHFMDSFKGRAKKD-----    | 5p.1 |
| SDR16C5 | P. bivittatus  | YFCNVMKs iLPAKMVDVLYDYFGVLQVMNRFKGR TKMTED-----  | 5p.1 |
| SDR16C5 | X. tropicalis  | YIMFALKniMSTKLGVVLGN YFGAFHFMDFKGRQKKE-----      | 5p.1 |
| SDR16C5 | D. rerio (a)   | YFLMALKgviPYKQSVILGMYFGAFNFMDAFKGREKKRD-----     | 5p.1 |
| SDR16C5 | D. rerio (b)   | YIIIGLRnllPTKVG VLLGEYLGAFNFMKFKGHGQKSD-----     | 5p.1 |

Figure S18. Alignment of the vertebrate SDR16C family variants. For further details see Fig. S13.

\* symbol marks the position of identical amino acid residues of the aligned SDR protein sequences.

|         |                |                                                                |           |  |
|---------|----------------|----------------------------------------------------------------|-----------|--|
|         |                |                                                                | x   x   x |  |
| SDR21C1 | H. sapiens     | MSSGIHVALVTGGNKGIGLAIVRDLCLRFSGDVLTARDVTRGQAAVQQQLQ-AEGLSPRF   |           |  |
| SDR21C1 | P. troglodytes | MSSGIHVALVTGGNKGIGLAIVRDLCLRFSGDVLTARDVTRGQAAVQQQLQ-AEGLSPRF   |           |  |
| SDR21C1 | M. musculus    | MSSSRPVALVTGANKGIGFAITRDLCRKFSGDVVLAAARDEERGQTAVQKLQ-AEGLSPRF  |           |  |
| SDR21C1 | M. domestica   | MSSSSRVAVVTGSNKGIGFAIVRDLCKQKFSGDVILTSRDTTRGQAATKKLQ-EEGLNPIF  |           |  |
| SDR21C1 | G. gallus      | -MSNVPVAVVTGSNKGIGLAIVRDLCKQFKGDVYLTARDPARGQGAVALQ-EEGLHPLF    |           |  |
| SDR21C1 | C. picta       | -MSSTPVAVVTGGNKGIGFAIVRALCKQFTGDVYLTARDPGRGQVAVTKLQ-QEGLNPLF   |           |  |
| SDR21C1 | X. tropicalis  | -MASAKVAVVTGGNKGIGLAIVRALCKQFKGDVYLTARDPKLGEEAVRALKEQEGLSPHF   |           |  |
| SDR21C1 | D. rerio       | -MSQCKVALVTGANKGIGFAIVRALCKEYTGDVYLSRDVGRGTAAVDSLK-KEGLHPLF    |           |  |
| SDR21C2 | H. sapiens     | MSSCSRVALVTGANRGIGLAIARELCRQFSGDVLTARDVARGQAAVQQQLQ-AEGLSPRF   |           |  |
| SDR21C2 | P. troglodytes | MSSCSRVALVTGANRGIGLAIARELCRQFSGDVLTARDVARGQAAVQQQLQ-AEGLSPRF   |           |  |
| SDR21C2 | M. musculus    | MSSCSRVALVTGANKGIGFAITRDLCRKFSGDVLTARDEARGRAAVQQQLQ-AEGLSPRF   |           |  |
| SDR21C2 | M. domestica   | MSSSSRVAVVTGSNKGIGFAIVRDLCKQKFSGDVILTSRDPTRGQEAVKELQ-EEGLNPIF  |           |  |
| SDR21C2 | X. tropicalis  | -MASAKVAVVTGGNKGIGLAIVRALCKQFKGDVYLTARDPKLGEEAVRALKEQEGLSPHF   |           |  |
|         |                | **   **   *   **   *   **   *   **   *   *   *   *   *   *   * |           |  |
|         |                |                                                                |           |  |
| SDR21C1 | H. sapiens     | HQLDIDDLQSIIRALRDFLRKEYGGLDVLVNNAGIAFkvADPTPFHIIQAEVTMKTNFFGTR | 1p.2      |  |
| SDR21C1 | P. troglodytes | HQLDIDDLQSIIRALRDFLRKEYGGLDVLVNNAGIAFkvADPTPFHIIQAEVTMKTNFFGTR | 1p.2      |  |
| SDR21C1 | M. musculus    | HQLDIDNPQSIIRALRDFLLKEYGGLDVLVNNAGIAFkvNDDTPFHIQAEVTMKTNFFGTR  | 1p.2      |  |
| SDR21C1 | G. gallus      | HQLDIDDLQSIKVLDFLRKEYGGLNVLVNNAGIAFkvSDRTPFAVQAEVTLKTNFFGTR    | 1p.2      |  |
| SDR21C1 | C. picta       | HQLDIEDLQSIIRTLQDFLRKEYGGLNVLVNNAGIAFkvADTTPFAIQAEVMTNFFFATR   | 1p.2      |  |
| SDR21C1 | M. domestica   | HQLDIDDPQSIIRTLRDFLRKEYGGVDVLVNNAGIAFkvADPTPFPIQAEVTMKTNFFGTR  | 1p.2      |  |
| SDR21C1 | X. tropicalis  | HQLDINDLQSIIRALGSLRKEYGGIDVLINNAGIAFkgTDPPTPFGTQANVTLQTNFFATR  | 1p.2      |  |
| SDR21C1 | D. rerio       | HQLDINDPNSVRTARDFQKEYGGLDVLINNAGIAFkmADTTPFGTQADVTLKTNFFATR    | 1p.2      |  |
| SDR21C2 | H. sapiens     | HQLDIDDLQSIIRALRDFLRKEYGGLNVLVNNAAVAFksDDPMPFDIKAEMTLKTNFFATR  | 1p.2      |  |
| SDR21C2 | P. troglodytes | HQLDIDDLQSIIRALRDFLRKEYGGLNVLVNNAAVAFksDDPMPFDIKAEMTLKTNFFATR  | 1p.2      |  |
| SDR21C2 | M. musculus    | HQLDIDDPQSIIRALRDFLRKEYGGLNVLVNNAGIAFrmDDPTPFDIQAEVTLKTNFFATR  | 1p.2      |  |
| SDR21C2 | M. domestica   | HQLDIDDPQSIIRTLRDFLRKEYGGVDVLVNNAGIAFkvTDTTPFPIQAEVTMKTNFFGIK  | 1p.2      |  |
| SDR21C2 | X. tropicalis  | HQLDINDLQSIIRALGGFLRKEYGGIDVLINNAGIAFkvADTTPFGTQAEVTLKTNFFATR  | 1p.2      |  |
|         |                | *****   *   *   ***   **   **   *   *   **   *   *   ****      |           |  |
|         |                |                                                                |           |  |
| SDR21C1 | H. sapiens     | DVCTELLPLIKPqgRVVNVSSIMSVRALKSCSPELQQKFRSETITEEELVGLMNKFVEDT   | 2p.2      |  |
| SDR21C1 | P. troglodytes | DVCTELLPLIKPqgRVVNVSSIMSVRALKSCSPELQQKFRSETITEEELVGLMNKFVEDT   | 2p.2      |  |
| SDR21C1 | M. musculus    | DVCKELLPLIKPqgRVVNVSSIMSVRALKNCRLQLQKFRSETITEEELVGLMNKFVEDT    | 2p.2      |  |
| SDR21C1 | G. gallus      | NICTELLPLIKPygRVVNVSSIMSVISALGGCSQELQKKFRSDTITEDELVELMTKFVEDT  | 2p.2      |  |
| SDR21C1 | C. picta       | DVCTELLPLIKPhgRVVNVSSIMSGVSALARCSRDQLQKFRSDTITEEELVKLMTKFVEDT  | 2p.2      |  |
| SDR21C1 | X. tropicalis  | DVCNELLPQVRPqgRVVNVSSIMSLSSALQGCSPELQKVFRSDTITEEELVTLMEKFVEDA  | 2p.2      |  |
| SDR21C1 | D. rerio       | DMCNVFLPIIKPqgRLVNVSSIMSGMSALGRCSPELQARFRSDDITEEELNGLMERFVREA  | 2p.2      |  |
| SDR21C2 | H. sapiens     | NMCNELLPIMKPhgRVVNISSLQCLRAFENCSEDLQERFHSETLTEGDLVDLMKKFVEDT   | 2p.2      |  |
| SDR21C2 | P. troglodytes | NMCNELLPIMKPhgRVVNISSLQCLRAFENCSEDLQERFHSETLTEGDLVDLMKKFVEDT   | 2p.2      |  |
| SDR21C2 | M. musculus    | NVCTELLPIMKPhgRVVNISSLQGLKALENCREDLQEKFRCDTLTEVDLVDLMKKFVEDT   | 2p.2      |  |
| SDR21C1 | M. domestica   | AVSAELLPLVKPrgRVVNVSSIMSVSLKSCSPELQQKFRSDTITEEELVRLMEKFVEDT    | 2p.2      |  |
| SDR21C2 | M. domestica   | AVSAELLPLVKPqgRVVNISSMMSLRALGCSPELQQKFRSDTITEEELVRLMEKFVEDT    | 2p.2      |  |
| SDR21C2 | X. tropicalis  | DACHELLPLIKPrgRVVNVSSIMASYMALGRCSQELQKVFRSDTITEEELVTLMEKFVEDA  | 2p.2      |  |
|         |                | **   *   *   *   *   *   *   *   *   *   *   *   *   *         |           |  |
|         |                | +   +                                                          |           |  |
| SDR21C1 | H. sapiens     | KKGVHQKEGWPSAYGVTKIGVTVLSRIHARKLSEQRKGDKILLNACCPGWVRTDMAGPK    |           |  |
| SDR21C1 | P. troglodytes | KKGVHQKEGWPSAYGVTKIGVTVLSRIHARKLSEQRKGDKILLNACCPGWVRTDMAGPK    |           |  |
| SDR21C1 | M. musculus    | KKGVHAEEGWPNSAYGVTKIGVTVLSRIHARKLNEQRRGDKILLNACCPGWVRTDMAGPK   |           |  |
| SDR21C1 | M. domestica   | KKGVHQKEGWPSAYGVTKIGVTVLSRIHARQLNEQRKGDKILLNACCPGWVRTDMAGPK    |           |  |
| SDR21C1 | G. gallus      | KKSVHEKEGWPNAYGVSKIGVTVLSRIQARMLNEKRKGDHILLNACCPGWVRTDMAGPK    |           |  |
| SDR21C1 | C. picta       | KNGVHEKEGWPNAYGVTKIGVTVLSRIQARMLNKKERKADRIILLNACCPGWVRTDMAGPN  |           |  |
| SDR21C1 | X. tropicalis  | KKGAHQKEGWPNAYGVSKVGTVTVLSRIQARELNEKRKDDGILLNACCPGWVRTDMAGPK   |           |  |
| SDR21C1 | D. rerio       | QEGVHSERGWPNAYGISTGLTTLTRIQARNLTKERPGDGILCNACCPGWVRTDMAGPN     |           |  |
| SDR21C2 | H. sapiens     | KNEVHEREGWPNPYGVSKLGTVTVLSRIARLRLDEKRKADRIILVNACCPGVKTDMDGKD   |           |  |

```

SDR21C2 P. troglodytes KNEVHEREGWPNSPYGVSKLGVTVLSRILARHLDEKRRKADRILVNACCPGPFVKTDMDGKD
SDR21C2 M. musculus KNEVHEREGWPD SAYGVSKLGVTVLRILARQLDEKRRKADRILLNACCPGWVKTDMDARDQ
SDR21C2 M. domestica KKG VHQKEGWPN SAYGVTKIGVTVLSRIHARQLNEQRKGD KILLNACCPGWVRTDMAGPK
SDR21C2 X. tropicalis KKG AHQKEGWPN TAYGVSKIGVTVLSRIQARELNEKRKDDGILLNACCPGWVRTDMAGPN
      *   ***   **  * * * * * * * * *   * * * * * * * * * * *
      *   ***   **  * * * * * * * * *   * * * * * * * * * * *

SDR21C1 H. sapiens ATKSPEEGAETPVYLALLPPDAEGPHGQFVSEKRVEQW
SDR21C1 P. troglodytes ATKSPEEGAETPVYLALLPPDAEGPHGQFVSEKRVEQW
SDR21C1 M. musculus ATKSPEEGAETPVYLALLPPDAEGPHGQFVQDKKVEPW
SDR21C1 M. domestica ATKSPEEGAETPVYLALLPPDATEPHGQFVTEKRVEKW
SDR21C1 G. gallus APKSPEEGAETPVYLALLPSDADGPHGQFVSEKTVRTW
SDR21C1 C. picta ATKSADEGAETPVYLALLAPDADGPHGQFVSEKKVQKW
SDR21C1 X. tropicalis APKSPDEGAETPVYLALLPNNAHSPHGELVSEKKVVPW
SDR21C1 D. rerio ATKSPDEGAITPVYLALLPAGAKEPHGQFVSEMKVQPW
SDR21C2 H. sapiens SIRTVEEGAETPVYLALLPPDATEPQGQLVHDKVVQNW
SDR21C2 P. troglodytes SIRTVEEGAETPVYLALLPPDATEPQGQLVHDKVVQNW
SDR21C2 M. musculus GSRTVEEGAETPVYLALLPPDATEPHGQLVRDKVVQTW
SDR21C2 M. domestica ATKSPEEGAETPVYLALLPPDATEPHGQFVMEKRVEKW
SDR21C2 X. tropicalis ATKSPDEGAETPVYLALLPNNAHSPHGELVSEKKVVPW
      *** * * * * * * * * * * * * * * * * * * * * * *

```

Figure S19. Alignment of the vertebrate SDR21C family variants. For further details see Fig. S13.  
 \* symbol marks the position of identical amino acid residues of the aligned SDR protein sequences.

|         |                 |                                                               |      |
|---------|-----------------|---------------------------------------------------------------|------|
| SDR25C1 | H. sapiens      | -----MLSAVARGYQ-GWFHP                                         |      |
| SDR25C1 | P. paniscus     | -----MLSAVARGYW-GWFHP                                         |      |
| SDR25C1 | M. musculus     | -----MAAIFRPIPWAFRGS---                                       |      |
| SDR25C1 | M. domestica    | -----MLRTLAFV-HGVLFSP                                         |      |
| SDR25C2 | H. sapiens      | -----MHKAG---LLG-LCAR                                         |      |
| SDR25C2 | P. troglodytes  | -----MHKTG---LLG-LCAR                                         |      |
| SDR25C2 | M. musculus     | -----MQKAGR---LLG-GWTQ                                        |      |
| SDR25C2 | M. domestica    | MATGLHPLQLPVRISGNMSKGAKKSGKQGTGPGFSKHISLLIKnrMLRTL---LKT-TCAQ | 1p.2 |
| SDR25C2 | G. gallus       | -----MWGA                                                     |      |
| SDR25C2 | A. carolinensis | -----MFPRAFSSFA-----A---IPQ-ARQA                              |      |
| SDR25C2 | X. tropicalys   | -----                                                         |      |
| SDR25C2 | D. rerio        | -----MLKAI---TRC-LWSN                                         |      |

|         |                 |                                                              |      |
|---------|-----------------|--------------------------------------------------------------|------|
|         |                 | x x x                                                        |      |
| SDR25C1 | H. sapiens      | CARLSVRMSSTG----IDRKGVLANRVAVVTGSTSgiGFAIARRLARDGAHVVISSRKQQ | 1p.1 |
| SDR25C1 | P. paniscus     | CARLSVRMSSTG----IDGKGVLANRVAVVTGSTSgiGFAIARRLARDGAHMVISSRKQQ | 1p.1 |
| SDR25C1 | M. musculus     | CLPLSARRFSKT----ADENRSLAGKVAVITGSTRgiGFAIARRLAQDGAHVVISSRKQE | 1p.1 |
| SDR25C1 | M. domestica    | RTPPSVRMSSTG----VDKKGVLDKVALITGSTQgiGFAIAQRLARDGAHVIVSSRKQE  | 1p.1 |
| SDR25C2 | H. sapiens      | AW-NSVRMASSG----MTRRDPLANKVALVTASTDgiGFAIARRLAQDGAHVIVSSRKQQ | 1p.1 |
| SDR25C2 | P. troglodytes  | AW-NSVRMASSG----MTRRDPLANKVALVTASTDgiGFAIARRLAQDGAHVIVSSRKQQ | 1p.1 |
| SDR25C2 | M. musculus     | AW-MSVRMASSG----LTRRNPLSNKVALVTASTDgiGFAIARRLAEDGAHVIVSSRKQQ | 1p.1 |
| SDR25C2 | M. domestica    | TL-KSIRTNASTTTMSRSNRLLQLDKVALVTASTEgiGFAIAQRLARDGAHVIVSSRKQQ | 2p.1 |
| SDR25C2 | G. gallus       | VGRAGLRAFSGG--GSPNVGRTLEGKVAVVTAATDgiGLAVAQRLGEAGARVLLSSRRQP | 1p.1 |
| SDR25C2 | A. carolinensis | MS-RFVRMN-----ATDSKSRANKVAVVTASTEgiGFAIARRLAQDGAHVIVSSRKKA   | 1p.1 |
| SDR25C2 | X. tropicalys   | -----MQSAG---GVQTPKKLQGVKVALVTASTEgiGLAIARRLGQDGARVLLSSRKQQ  | 1p.1 |
| SDR25C2 | D. rerio        | PV-AGRMM-----MSHHISQNLSGKVAIVTASTDgiGLAAAEALQQRGAHVIVSSRRQT  | 1p.1 |
|         |                 | * ** * * * * * * * * *                                       |      |

|         |                 |                                                               |      |
|---------|-----------------|---------------------------------------------------------------|------|
| SDR25C1 | H. sapiens      | NVDRAAKLQGEGLSVAGIVCHVGKAEDREQLVakaLEHCGGVDFLVCAGVNPLVGSTL    | 2p.0 |
| SDR25C1 | P. paniscus     | NVDWAMAKLQGEGLSVAGIVCHVGKAEDREQLVakaLEHCGGVDFLVCAGVNPLVGSTL   | 2p.0 |
| SDR25C1 | M. musculus     | NVDEAVTILKEEGLSVTGTMTCHVGKAEDRQLHVTtaLKHSGGIDFLVCAGVNPLVGSTL  | 2p.0 |
| SDR25C1 | M. domestica    | NVDQAVALLKEEGLIAKGMVCHAGKAEDRDKLVTmVADQYGGVDFLICAAGVNPLVGSTL  | 2p.0 |
| SDR25C2 | H. sapiens      | NVDQAVATLQGEGLSVTGTVCHVGKAEDRERLVataVKLHGGIDILVSNAAVNPFFGSIM  | 2p.0 |
| SDR25C2 | P. troglodytes  | NVDQAVATLQGEGLSVTGTVCHVGKAEDRERLVataVKLHGGIDILVSNAAVNPFFGSIM  | 2p.0 |
| SDR25C2 | M. musculus     | NVDRAVATLQGEGLSVTGIVCHVGKAEDREKLITtaLKRHQGIDILVSNAAVNPFFGNLM  | 2p.0 |
| SDR25C2 | M. domestica    | NVDRAVAELQGEGLSVRGTVCHVAKAEDRKRLVntaLEYGGIDILVSNAAVNPFFGKLL   | 3p.0 |
| SDR25C2 | G. gallus       | NVDAAVQKLRAQGLEVSGVVCHVGQPQDRQHVLVQtaLDTYGAIDILVSNAAVNPVMGSTL | 2p.0 |
| SDR25C2 | A. carolinensis | NVDRAVAELQTENLSVSGLVCHVGKAEDRKRLIetaVERHGGIDILVSNAAVNPYFGSIL  | 2p.0 |
| SDR25C2 | X. tropicalys   | NVDRAVQDLRKEGIEVEGTVCHVGKNKEDRERLIetaVQRFGGVDILVSNAAVNPFFGSIL | 2p.0 |
| SDR25C2 | D. rerio        | NVDKAVSLRSKNIKVIGTTCNVGKAEDREKLINmtVEQCGGVDIILVSNAAVNPFFGNIL  | 2p.0 |
|         |                 | *** * * * * * * * * *                                         |      |

|         |                 |                                                               |                |
|---------|-----------------|---------------------------------------------------------------|----------------|
|         |                 | + +                                                           |                |
| SDR25C1 | H. sapiens      | GTSEQIWDkiLSVNVKSPALLSQQLLPYMEN-rrGAVILVSSIAAYNPVvaLGVYNVSKT  | 3p.0 4p.1 5p.0 |
| SDR25C1 | P. paniscus     | GTSEQIWDkiLSVNVKSPALLSQQLLPYMEN-rrDAVILVSSIAAYNPVvaLGVYNVSKT  | 3p.0 4p.1 5p.0 |
| SDR25C1 | M. musculus     | GASEQIWDkiLDVNVKSPALLSQQLLPYMEKRggGSVVLVSSGVAYVPVpkLGPYNVSKT  | 3p.0 4p.1 5p.0 |
| SDR25C1 | M. domestica    | GASEQVWDkiLDVNVKSPALLLAKLLPYMEKRgssSVVLVSSVTGYVPVpkLGPYNVSKT  | 3p.0 4p.1 5p.0 |
| SDR25C2 | H. sapiens      | DVTEEVWDktLDINVKAPALMTKAVVPEMEKRggGSVVIVSSIAAFSPSpGfSPYNVSKT  | 3p.0 4p.1 5p.0 |
| SDR25C2 | P. troglodytes  | DVTEEVWDktLDINVKAPALMIKAVVPEMEKRggGSVVIVSSIAAFSPSpGfSPYNVSKT  | 3p.0 4p.1 5p.0 |
| SDR25C2 | M. musculus     | DVTEEVWDkvlSINVtATAMMIKAVVPEMEKRggGSVVIVSGVAGFTRFpsLGPYNVSKT  | 3p.0 4p.1 5p.0 |
| SDR25C2 | M. domestica    | DATEEVWDkiLDINVKSAALLVNVVPEMVKRggGSVVVFVSSIAAYSFFqyLGPYNVSKT  | 4p.0 4p.1 5p.0 |
| SDR25C2 | G. gallus       | EVEESAWekiFQVNVTAaAMLVKLVPHMEKRggGAVVLVTSVAGFMPFpaLGPYSVSKT   | 3p.0 4p.1 5p.0 |
| SDR25C2 | A. carolinensis | DTPGEVWDkiLDINVKAAAMLVQSVVPHMEKRggGAIVLVSSIAAYSFFpGfLGPYNVSKT | 3p.0 4p.1 5p.0 |
| SDR25C2 | X. tropicalys   | ESNEEVWDkiLDVNVKATFLLVLKLVPKMQERggGSVVIVSSVAGFTPFpsLGPYSVSKT  | 3p.0 4p.1 5p.0 |
| SDR25C2 | D. rerio        | DSTEEVWDkiLGVNVKASFLLLTKMVVPHIEKRggGSVVIVSSVAGYQMPpaLGPYSVSKT | 3p.0 4p.1 5p.0 |



|         |                 |                                                               |      |      |  |   |  |     |  |   |      |  |
|---------|-----------------|---------------------------------------------------------------|------|------|--|---|--|-----|--|---|------|--|
|         |                 |                                                               | * *  | **   |  | * |  | * * |  | * | ** * |  |
| SDR25C1 | H. sapiens      | ALLGLTRTLALELAPKDIRVNCVVPGLIKTDFSKvfHGNEslWKNFKEHHQLQriGESED  | 6p.0 | 7p.1 |  |   |  |     |  |   |      |  |
| SDR25C1 | P. paniscus     | ALLGLTRTLALELAPKDIRVNCVVPGLIKTDFSKvfYGNepFWKNFKEHHQLQriGESED  | 6p.0 | 7p.1 |  |   |  |     |  |   |      |  |
| SDR25C1 | M. musculus     | ALLGLCKSLAVELAPKGIRVNCLVPGLIKTDFSLreKTMpNMLpDMNKIFGVKrlGEPEE  | 6p.0 | 7p.1 |  |   |  |     |  |   |      |  |
| SDR25C1 | M. domestica    | ALLGLTKTLAVELAPKGIRVNCLVPGLIKTDFSHilHEDEAFKKDFKNLYGMQrtGQPED  | 6p.0 | 7p.1 |  |   |  |     |  |   |      |  |
| SDR25C2 | H. sapiens      | ALLGLTKTLAIELAPRNIRVNCLAPGLIKTSFSRmlWMDKEKEESMKETLRIRrlGEPED  | 6p.0 | 7p.1 |  |   |  |     |  |   |      |  |
| SDR25C2 | P. troglodytes  | ALLGLNKTLAIELAPRNVRVNCLAPGLIKTSFSRmlWMDKEKEESMKETLRISrlGEPED  | 6p.0 | 7p.1 |  |   |  |     |  |   |      |  |
| SDR25C2 | M. musculus     | ALLGLTKNFAAELAPKNIRVNCLAPGLIKTRFSSvlWEEKAREDFIKEAMQIRrlGKPED  | 6p.0 | 7p.1 |  |   |  |     |  |   |      |  |
| SDR25C2 | M. domestica    | ALLGLTKNYASELEPKGIRVNCLAPGLIKTNFSSllWKDESENTSKNVMKISrlGEPHE   | 7p.0 | 8p.1 |  |   |  |     |  |   |      |  |
| SDR25C2 | G. gallus       | ALLGLVKVLAPELRARGVRINAVAPGLIQTRFSAalWQNEATKEQLMSSMGIDrlGTPSD  | 6p.0 | 7p.1 |  |   |  |     |  |   |      |  |
| SDR25C2 | A. carolinensis | ALLGLVRNFVPELSSRKIRINCLAPGLIETKFSLalREDEATLEKTMESLRIQriGVPSD  | 6p.0 | 7p.1 |  |   |  |     |  |   |      |  |
| SDR25C2 | X. tropicalys   | ALLGLTKALAPELSPLNIRVNCLAPGLIIRTKFSSalWKNEAVCEHLMSTLGISriGQPDD | 6p.0 | 7p.1 |  |   |  |     |  |   |      |  |
| SDR25C2 | D. rerio        | ALLGLTRALAPELAQSNIRVNCVAPGLIKTRFSSalWENEGVLEEFLKQTSIKrlGQPPEE | 6p.0 | 7p.1 |  |   |  |     |  |   |      |  |
|         |                 | *****        **        * *        * * * *        * *          |      |      |  |   |  |     |  |   |      |  |
|         |                 |                                                               |      |      |  |   |  |     |  |   |      |  |
| SDR25C1 | H. sapiens      | CAGIVSFLCSPDASYVNGENIavAGYSTRL-                               |      |      |  |   |  |     |  |   |      |  |
| SDR25C1 | P. paniscus     | CAGIVSFLCSPDASYINGENIavAGYSTRL-                               |      |      |  |   |  |     |  |   |      |  |
| SDR25C1 | M. musculus     | CAGLVsFLCSDSASYITGENIMvAGFSSKL-                               |      |      |  |   |  |     |  |   |      |  |
| SDR25C1 | M. domestica    | CAGIVSFLCSPDASYITGENIIVAGFS PKL-                              |      |      |  |   |  |     |  |   |      |  |
| SDR25C2 | H. sapiens      | CAGIVSFLCSEDASYITGETVVVGGGTPSRL                               |      |      |  |   |  |     |  |   |      |  |
| SDR25C2 | P. troglodytes  | CAGIVSFLCSEDASYITGETVVVGGGTPSRL                               |      |      |  |   |  |     |  |   |      |  |
| SDR25C2 | M. musculus     | CAGIVSFLCSEDASYINGETVVVGGGTPSRL                               |      |      |  |   |  |     |  |   |      |  |
| SDR25C2 | M. domestica    | CAGIVSFLCSPDAGYITGETIVVAGGSPSRL                               |      |      |  |   |  |     |  |   |      |  |
| SDR25C2 | G. gallus       | VAEVVAFLCSPAASYVVGETMVVAGGTPSRL                               |      |      |  |   |  |     |  |   |      |  |
| SDR25C2 | A. carolinensis | CSGIVSFLCSPDADYITGETIVVAGGAPSRL                               |      |      |  |   |  |     |  |   |      |  |
| SDR25C2 | X. tropicalys   | CAGAVSFLCSPDASYITGETIVVSGGSHSRL                               |      |      |  |   |  |     |  |   |      |  |
| SDR25C2 | D. rerio        | IGGVIAFLCSDEASYITGETITVTGGMNSRL                               |      |      |  |   |  |     |  |   |      |  |
|         |                 | **** * * * * * *                                              |      |      |  |   |  |     |  |   |      |  |

Figure S20. Alignment of the vertebrate SDR25C family variants. For further details see Fig. S13, Table S20.

\* symbol marks the position of identical amino acid residues of the aligned SDR protein sequences.

|         |                     |                                                                               |      |      |
|---------|---------------------|-------------------------------------------------------------------------------|------|------|
| SDR26C1 | H. sapiens          | MAFMKKYLLPILGLFMAYYYYSANEEFRpeMLQGKKVIVTGA--SKGIGREMayHLAKMG                  | 1p.2 |      |
| SDR26C1 | P. troglodytes      | MAFMKKYLLPILGLFMAYYYYSANEEFRpeMLQGKKVIVTGA--SKGIGREMayHLAKMG                  | 1p.2 |      |
| SDR26C1 | M. musculus         | MVMKNYLLSLPLVLFLAYYYYSTNEEFrpeMLQGGKVITGA--SKGIGREMayHLSKMg                   | 1p.2 |      |
| SDR26C1 | S. harrisii         | MALLKMTFLPALGLLLAYFYPTTDNFRseMLQGRVIVTGA--STGIGEQUIAYHLARMG                   | 1p.2 |      |
| SDR26C1 | G. gallus           | MGLLQKLILPVLGLVLAFCFYSSRENFRpeMLKGKRVIIVTGA--STGIGEQMAYHLARMG                 | 1p.2 |      |
| SDR26C1 | A. carolinensis     | MGFFQKLLIPSVALVLAVCFYSRKEDFKpeMLKGKYVIVTGA--STGIGEQMAYHLARMG                  | 1p.2 |      |
| SDR26C1 | X. tropicalis       | MAGVKLVLLSLFV-GTVNYYFYRSNEEFrpeLVRGKRVLITGA--STGIGEQUIAEfYAQMg                | 1p.2 |      |
| SDR26C2 | H. sapiens          | ----MKVLL-LTGLGALFFAYYWDDNFDpaSLQGARVLLTGA--NAGVGEELAYHYARLG                  | 1p.2 |      |
| SDR26C2 | P. abelii           | ----MKVLL-LTGLGALFFAYYWDDNFDpaSLQGARVLLTGA--NAGVGEELAYHYARLG                  | 1p.2 |      |
| SDR26C2 | I. tridecemlineatus | ---MKVLL-LAGLGALFSAYYWDDNFEpaRLQGARVLLTGAAGDAGVGEELAYHYARLG                   | 1p.2 |      |
| SDR26C2 | N. nippon           | KMPVKGVLC-AAAIAGLLAFFWKDFPNpeSLSGARVLLTGA--SAGIGEQUAHYARFG                    | 1p.2 |      |
| SDR26C2 | A. carolinensis     | MRAAGLLLV-VLGIAALLWVAFSWRDTFEpgSLSGARVLLTGA--SDGIGEQUAHYARFG                  | 1p.2 |      |
| SDR26C2 | X. tropicalis       | MGIHIKRCW-F-IILVASAAYILRDSFDpeTLANTRVLVTGA--STGIGEEIAYHYARAG                  | 1p.2 |      |
| SDR26C2 | S. grahami          | ---MKGYLG-FFLLIIAALTAYMWDRDTFDpeSVRGARVLTGA--SSGIGEQMAYHYAKFG                 | 1p.2 |      |
|         |                     | * * *                                                                         |      |      |
|         |                     |                                                                               |      |      |
| SDR26C1 | H. sapiens          | AHVVVTARSKETLQkvvSHCLELGAASAHYIAGTMEDMTFAEQFVAQAGKLmgGLDMLIL                  | 2p.0 | 3p.2 |
| SDR26C1 | P. troglodytes      | AHVVVTARSKETLQkvvSHCLELGAASAHYIAGTMEDMTFAEQFVAQAGKLmgGLDMLIL                  | 2p.0 | 3p.2 |
| SDR26C1 | M. musculus         | AHVVLVTARSEEGLQkvvSRSCELGGAASAHYIAGTMEDMTFAEQFIVKAGKLmgGLDMLIL                | 2p.0 | 3p.2 |
| SDR26C1 | S. harrisii         | AHLVVTARTEAKLKkvIAECKLGAASAHPISGMTDELVEAQVVIKAeKLmgGLDMLIL                    | 2p.0 | 3p.2 |
| SDR26C1 | G. gallus           | AHVLVTARTEAKLQqvVERCRALGAGSARLVSGSMEDMATTRLQVEVAEAElmgGLDMLIL                 | 2p.0 | 3p.2 |
| SDR26C1 | A. carolinensis     | SHILITARTEAKLQkvvSRSCELGGAASARYVNGSMEDIIFAQLVVKKAELwgnLDMLIL                  | 2p.0 | 3p.2 |
| SDR26C1 | X. tropicalis       | AHIMLTARRHQRLQevANQCCLKLGAASADYVASDMGNLTSAQYVAQETVKKlglDYLVL                  | 2p.0 | 3p.2 |
| SDR26C2 | H. sapiens          | SHLVLTAHTeALLQkvvGCNCRKLGAAPKVFIYAADMASPEAPESVVQFALDKlglDYLVL                 | 2p.0 | 3p.2 |
| SDR26C2 | P. abelii           | SHLVLTAHTeALLQkvvGCNCRKLGAAPKVFIYAADMASPEAPESVVQFALDKlglDYLVL                 | 2p.0 | 3p.2 |
| SDR26C2 | I. tridecemlineatus | SHLVLSAQAEALLQkvvGCNCRKLGAAPKVFIYAADMASPEAPERVVQFALDKlglDYLVL                 | 2p.0 | 3p.2 |
| SDR26C2 | N. nippon           | AEIVLTARREA VLQkvvVEKCLTLGAKKIIFYIPADMSSPSPEKEVVQFAVQklglDYLVL                | 2p.0 | 3p.2 |
| SDR26C2 | A. carolinensis     | AQIVLTARREA VLQkvvMAKCLELGAKKAVYFVADMASPETEKlvRFASEqlglDFVVL                  | 2p.0 | 3p.2 |
| SDR26C2 | X. tropicalis       | AKLVLtarrehALQevKSRCELGAKNVFLVVADMASHNAREQVVAELSAalglDYLVL                    | 2p.0 | 3p.2 |
| SDR26C2 | S. grahami          | AQIVITARRVDALKkvvQKC VKLAGQAKAMYVTGDMSDPADPERVFkyAVEKlglDYLVL                 | 2p.0 | 3p.2 |
|         |                     | * * *                                                                         |      |      |
|         |                     |                                                                               |      |      |
| SDR26C1 | H, sapiens          | NHITN-TSLNFLHDDIH HVRSMEVNFLSYVVLTVAA LPM LKQSNGSI VVVSSLagKVAY               | 4p.2 |      |
| SDR26C1 | P. troglodytes      | NHITN-TSLNFLHDDIH HVRSMEVNFLSYVVLTVAA LPM LKQSNGSI VVVSSLagKVAY               | 4p.2 |      |
| SDR26C1 | M. musculus         | NHITQ-TSLSLFHDDIHS VRrvMEVNFLSYVVMSTAALPM LKQSNGSI IAVISLagKMTQ               | 4p.2 |      |
| SDR26C1 | S. harrisii         | NHIEH-SSLDYFN GDIDARLRKSM DINF FSY ITMT SAAL PM LKH TNG SI VVVSSVagKITI       | 4p.2 |      |
| SDR26C1 | G. gallus           | NHV GK-SYFN YFDG DVGHVQK LLNIN FL SVAM TSAL PM LRKSG SI VVVSSMagKVGF          | 4p.2 |      |
| SDR26C1 | A. carolinensis     | NHVGS-SYKF FFDS DVGHVQK LLNIN FL SYVSM TVAA LP ML KKSG SI VVVSSMagKVGF        | 4p.2 |      |
| SDR26C1 | X. tropicalis       | NHIGGSASF GF FGKD MPV VG SIT IN FL SYV QL T STA LRAL QES QG SI V VM SSMsgRIGA | 4p.2 |      |
| SDR26C2 | H. sapiens          | NHIGG-APA GTR ARSPQA TRWLmqvNFVS VQL T SRALPS LTDSKGS LVVSSllgRVPT            | 4p.0 | 5p.2 |
| SDR26C2 | P. abelii           | NHIGG-APA GTR ARSPQA TRWLmqvNFVS VQL T SRALPS LTDSKGS LVVSSllgRVPT            | 4p.0 | 5p.2 |
| SDR26C2 | I. tridecemlineatus | NHL GG-IPA GMRR ASQAATH WLvm qv NF LS VQL TK LAP SL T DS KGS LVVSSllgRVFP     | 4p.0 | 5p.2 |
| SDR26C2 | N. nippon           | NHIGM-TR FQ MW AGDVEYTRWLmqvNFFSYVALATAALPTLEKNKGS LVVSSltgKIPT               | 4p.0 | 5p.2 |
| SDR26C2 | A. carolinensis     | NHIGA-SP FEMWAGDV DHLRWLmqvNFFSYVALASAAPALAESKGS LVVSSLagRVST                 | 4p.0 | 5p.2 |
| SDR26C2 | X. tropicalis       | NHIGW-TP FKMWDG DVNHTRWLmevNFLSYIHLATAALPYLTQSKGSI IVLSSltakTPI               | 4p.0 | 5p.2 |
| SDR26C2 | S. grahami          | NHV GN-TN VELWKGDADHVRSLmqvNF SVVQMAAAALPVLETSGSSI VVVSSVagKLAS               | 4p.0 | 5p.2 |
|         |                     | ** * *                                                                        |      |      |
|         |                     |                                                                               |      |      |
|         |                     |                                                                               |      |      |
|         |                     |                                                                               |      |      |
|         |                     |                                                                               |      |      |
|         |                     |                                                                               |      |      |
|         |                     |                                                                               |      |      |
|         |                     |                                                                               |      |      |
|         |                     |                                                                               |      |      |
|         |                     |                                                                               |      |      |
|         |                     |                                                                               |      |      |
|         |                     |                                                                               |      |      |
|         |                     |                                                                               |      |      |
|         |                     |                                                                               |      |      |
|         |                     |                                                                               |      |      |
|         |                     |                                                                               |      |      |
|         |                     |                                                                               |      |      |
|         |                     |                                                                               |      |      |
|         |                     |                                                                               |      |      |
|         |                     |                                                                               |      |      |
|         |                     |                                                                               |      |      |
|         |                     |                                                                               |      |      |
|         |                     |                                                                               |      |      |
|         |                     |                                                                               |      |      |
|         |                     |                                                                               |      |      |
|         |                     |                                                                               |      |      |
|         |                     |                                                                               |      |      |
|         |                     |                                                                               |      |      |
|         |                     |                                                                               |      |      |
|         |                     |                                                                               |      |      |
|         |                     |                                                                               |      |      |
|         |                     |                                                                               |      |      |
|         |                     |                                                                               |      |      |
|         |                     |                                                                               |      |      |
|         |                     |                                                                               |      |      |
|         |                     |                                                                               |      |      |
|         |                     |                                                                               |      |      |
|         |                     |                                                                               |      |      |
|         |                     |                                                                               |      |      |
|         |                     |                                                                               |      |      |
|         |                     |                                                                               |      |      |
|         |                     |                                                                               |      |      |
|         |                     |                                                                               |      |      |
|         |                     |                                                                               |      |      |
|         |                     |                                                                               |      |      |
|         |                     |                                                                               |      |      |
|         |                     |                                                                               |      |      |
|         |                     |                                                                               |      |      |
|         |                     |                                                                               |      |      |
|         |                     |                                                                               |      |      |
|         |                     |                                                                               |      |      |
|         |                     |                                                                               |      |      |
|         |                     |                                                                               |      |      |
|         |                     |                                                                               |      |      |
|         |                     |                                                                               |      |      |
|         |                     |                                                                               |      |      |
|         |                     |                                                                               |      |      |
|         |                     |                                                                               |      |      |
|         |                     |                                                                               |      |      |
|         |                     |                                                                               |      |      |
|         |                     |                                                                               |      |      |
|         |                     |                                                                               |      |      |
|         |                     |                                                                               |      |      |
|         |                     |                                                                               |      |      |
|         |                     |                                                                               |      |      |
|         |                     |                                                                               |      |      |
|         |                     |                                                                               |      |      |
|         |                     |                                                                               |      |      |
|         |                     |                                                                               |      |      |
|         |                     |                                                                               |      |      |
|         |                     |                                                                               |      |      |
|         |                     |                                                                               |      |      |
|         |                     |                                                                               |      |      |
|         |                     |                                                                               |      |      |
|         |                     |                                                                               |      |      |
|         |                     |                                                                               |      |      |
|         |                     |                                                                               |      |      |
|         |                     |                                                                               |      |      |
|         |                     |                                                                               |      |      |
|         |                     |                                                                               |      |      |
|         |                     |                                                                               |      |      |
|         |                     |                                                                               |      |      |
|         |                     |                                                                               |      |      |
|         |                     |                                                                               |      |      |
|         |                     |                                                                               |      |      |
|         |                     |                                                                               |      |      |
|         |                     |                                                                               |      |      |
|         |                     |                                                                               |      |      |
|         |                     |                                                                               |      |      |
|         |                     |                                                                               |      |      |
|         |                     |                                                                               |      |      |
|         |                     |                                                                               |      |      |
|         |                     |                                                                               |      |      |
|         |                     |                                                                               |      |      |
|         |                     |                                                                               |      |      |
|         |                     |                                                                               |      |      |
|         |                     |                                                                               |      |      |
|         |                     |                                                                               |      |      |
|         |                     |                                                                               |      |      |
|         |                     |                                                                               |      |      |
|         |                     |                                                                               |      |      |
|         |                     |                                                                               |      |      |
|         |                     |                                                                               |      |      |
|         |                     |                                                                               |      |      |
|         |                     |                                                                               |      |      |
|         |                     |                                                                               |      |      |
|         |                     |                                                                               |      |      |
|         |                     |                                                                               |      |      |
|         |                     |                                                                               |      |      |
|         |                     |                                                                               |      |      |
|         |                     |                                                                               |      |      |
|         |                     |                                                                               |      |      |
|         |                     |                                                                               |      |      |
|         |                     |                                                                               |      |      |

| SDR26C1 | X. tropicalis       | PFTTSYCAASKFALEGFYSSLRREFDLQKNNSMVTVAILGYIDteNAVKKVGKNV-TMTAS | 5p.2 |
|---------|---------------------|---------------------------------------------------------------|------|
| SDR26C2 | H. sapiens          | SFSTPYSAAKFALDGGFFGSLRRELDVQDVNVAITMCVLGLRDRASAAEAvgST-SRPRQ  | 6p.1 |
| SDR26C2 | P. abelii           | SFSTPYSAAKFALDGGFFGSLRRELDVQDVNVAITMCVLGLRDRASAAEAvgVT-RVKAA  | 6p.1 |
| SDR26C2 | I. tridecemlineatus | SFSTPYSAAKFALDSSFFGSLRRELDVQDVNVAITMCVLGLRDPASTVEGVrgVR-RAKAA | 6p.1 |
| SDR26C2 | N. nippon           | PFTTYSATKFALDGGFFSSLRHELIMQKRNISITLCILGLIDTDSALENTrgKV-HLTAS  | 6p.1 |
| SDR26C2 | A. carolinensis     | PFVAPYSATKFALEGFFGSLRHELVMOQKEISITLCFLGLIDTESAISKTrggKV-AMTAA | 6p.1 |
| SDR26C2 | X. tropicalis       | PYTTSYAASKFALEGFFSSLRHELVMOQNPNVSITLCILGLIDTQSAMEKIkdKI-TMSAY | 6p.1 |
| SDR26C2 | S. grahami          | PFVAPYTSTKTFAMNGFFGALQNELAIRKSNVSVSILILGLIDTESAMNKIrgFT-TMTAY | 6p.1 |
|         |                     | *      ***      *      *      **                              |      |
| SDR26C1 | H. sapiens          | PKEECALEIIKGGALRQEEVYYDSS----LW-TTLLIRNPCRKILEFLYSTSYNMDRFIN  |      |
| SDR26C1 | P. troglodytes      | PKEECALEIIKGGALRQEEVYYDSS----LW-TTLLIRNPCRKILEFLYSTSYNMDRFIN  |      |
| SDR26C1 | M. musculus         | PKEECALEIIKGTALRKSEVYYDKS----PL-TPILLGNPRKIMEFFSLRYYNKDMFVS   |      |
| SDR26C1 | S. harrisii         | PKEECALKIIEGGVLQREEIAYPF-----F-PKFLLNWNPIRMIMEYFYFLNIKIDKFNR  |      |
| SDR26C1 | G. gallus           | PKEECALEIIKGGTLRQREVYYRYA----STKLPLLLRDWAAEELDLLVRQYRPERLRA   |      |
| SDR26C1 | A. carolinensis     | PKEECALEIIKGGALRQREVYYEYT----STKIPLLIREWAPDLLDYLIIRRSYNMEKLKE |      |
| SDR26C1 | X. tropicalis       | SKEDCAREVVKA AVLRRPELFYYPW---GIKPIVLLRDWFPGLVAKFLDKFYILENIQ-  |      |
| SDR26C2 | H. sapiens          | PEHRGVPLQ-----SQTAMFLPPTVPGARTLTETPLRGWPQ-PKMKSSRQKSKEKNDG    |      |
| SDR26C2 | P. abelii           | PGPKAALAVIRGGATRAAGVFYPWR-----FHLLCLLRWLPRPRAWFIRQELNVTAAAA   |      |
| SDR26C2 | I. tridecemlineatus | PGPKAALAVIRGGATRASCVFYPWR-----LHLLCLLRGWLPHPRAWFIRQDLNISAVAA  |      |
| SDR26C2 | N. nippon           | PAPEAALAIIWGGATRVQEVFYPWW----LQYTCLLWLVFPHDRDQVLQSYNYSSP--    |      |
| SDR26C2 | A. carolinensis     | PASEAALSIVKGGATRAQEVFYPWT-----VRILFLVRDFPQAQRDAMIRGAYVYPPPS-  |      |
| SDR26C2 | X. tropicalis       | PASDAALAVVSAGAGRQREMYYPWF-----VRPLCFFRDWFPQHRDWFIRQMYHYNS---  |      |
| SDR26C2 | S. grahami          | PASEAALSIIKAGATRQKEAYYPWF-----HYFTCLINNIFPFMKDILSSLSAENMD--   |      |
| SDR26C1 | H. sapiens          | K-----                                                        |      |
| SDR26C1 | P. troglodytes      | K-----                                                        |      |
| SDR26C1 | M. musculus         | N-----                                                        |      |
| SDR26C1 | S. harrisii         | KLFMKEN-PQYQKRV--DSRPLLVP-----                                |      |
| SDR26C1 | G. gallus           | A-----                                                        |      |
| SDR26C1 | A. carolinensis     | D-----                                                        |      |
| SDR26C1 | X. tropicalis       | -----                                                         |      |
| SDR26C2 | H. sapiens          | HLEPVTAWEVQVPRVRRLCRGLARPHLFGHD                               |      |
| SDR26C2 | P. abelii           | A-----                                                        |      |
| SDR26C2 | I. tridecemlineatus | -----                                                         |      |
| SDR26C2 | N. nippon           | -----                                                         |      |
| SDR26C2 | A. carolinensis     | -----                                                         |      |
| SDR26C2 | X. tropicalis       | -----                                                         |      |
| SDR26C2 | S. grahami          | -----                                                         |      |



|                         |                                                               |      |      |
|-------------------------|---------------------------------------------------------------|------|------|
| SDR28C1 M. domestica    | TGSVGGlmgLPFNAVYCASKFALEGLCESLAVLLLLPFGVhiSLIECGPVRTAFQEKLEGG | 3p.2 | 4p.1 |
| SDR28C1 G. gallus       | SSSVGGlqgLPFNAVYCASKFALEGLCESLAIVLRPFNIhmTLVECGPVHTAFMDNAWRA  | 3p.2 | 4p.1 |
| SDR28C1 X. tropicalis   | SSSVGGlqgIPFNNDIYCASKFAVEGLCESLAIVLQHFNIhSLIECGPVSTNFMNHLGV   | 3p.2 | 4p.1 |
| SDR28C1 D. rerio        | TGSMGGLqgLPFNEVYCASKFAIEGACESLAILLQHFNIhiSLIECGPVNTDFLMNLKRT  | 3p.2 | 4p.1 |
| SDR28C2 H. sapiens      | ISSVMGLqgVIFNDVYAASKFALEGFFESLAIQLLQFNifiSLVEPGPVVTEFEGKLLAQ  | 3p.2 | 4p.1 |
| SDR28C2 P. paniscus     | ISSVMGLqgVIFNDVYAASKFALEGFFESLAIQLLQFNifiSLVEPGPVVTEFEGKLLAQ  | 3p.2 | 4p.1 |
| SDR28C2 M. musculus     | VSSVMGLqgVMFNDVYAASKFALEGFFESLAIQLRQFNifiSMVEPGPVTTDFEGKLLAQ  | 3p.2 | 4p.1 |
| SDR28C2 M. domestica    | ISSVMGLqgVIFNDIYSASKFALEGFCESLAVQLLQFNifvSLVEPGPVNTDFESKLMDQ  | 3p.2 | 4p.1 |
| SDR28C2 G. gallus       | ISSVMGLqgVIFNDVYAASKFAVEGFCESLVVQALRENVaiSLVEPGPVTEFEAKVYEE   | 3p.2 | 4p.1 |
| SDR28C2 A. carolinensis | ISSVMGLqgVPFNDVYAASKFAMEGFCESLAVQLLKFNifvSMVEPGPVNTEFEMKLMEE  | 3p.2 | 4p.1 |
| SDR28C2 X. tropicalis.  | ISSVMGLqgIMFNDIYAASKFAVEGFCESLLYQTMNFNifiTLVEPGPVVTEFELKVNEE  | 3p.2 | 4p.1 |
| SDR28C2 I. punctatus    | MSSVMGMqgVVFNDVYTASKFAIEGFCESLAVQLLKFNvklSLIEPGPVHTEFEAKMEE   | 3p.2 | 4p.1 |

\* \* \* \* \* \* \* \* \* \* \* \* \* \* \*

|                         |                                                              |      |
|-------------------------|--------------------------------------------------------------|------|
| SDR28C1 H. sapiens      | PEE---VLDRTDIHTFHRF-YQYLAHSKQVFREAAQNPEEVAevFLTALRAPKPTLRYFT | 5p.0 |
| SDR28C1 P. abelii       | PDE---VLDRTDIHTFHRF-YQYLAHSKQVFREAAQNPEEVAevFLTALRAPKPTLRYFT | 5p.0 |
| SDR28C1 M. musculus     | PGG---ALERADAQTRHLF-AHYLRGYEQALSE-AQDPPEEVTeFLTMARAPQPALRYFS | 5p.0 |
| SDR28C1 M. domestica    | PGG---VLGSADLDTRALF-SRYQRHCERVFREVAQDPEDVVeVfVQALCAPRPVLRYS  | 5p.0 |
| SDR28C1 G. gallus       | DPDGRELRA-LDAETQQLY-RRYLQHCTQLFLDAAQEVDEVLqvFLEAIAAPRPPLRIT  | 5p.0 |
| SDR28C1 X. tropicalis.  | DANDSRlQA-GDSdTRSly-AQYLQHCHSLFQDVAQDTEEILqvFLEAIEAPTpslryft | 5p.0 |
| SDR28C1 D. rerio        | ETGDKELEVEVDAHTRSly-DQYLQHCHSvFQNAAQDTEdIIqvYLEAMEAQTPFLRYT  | 5p.0 |
| SDR28C2 H. sapiens      | VSM--AEFPgTDPETLHYFRDLYLPASRELFRSVGQNPQDVVqaiVNVISSTRPPLRRQT | 5p.0 |
| SDR28C2 P. paniscus     | VST--AEFPgTDPETLHYFRDLYLPASRELFRSVGQNPQDVVqaiVNVISSTRPPLRRQT | 5p.0 |
| SDR28C2 M. musculus     | VSK--AEFPDTPDPTLGYFRDLYLPASRELFRSVGQSPRDVAqviAKVIGTRPPLRRQT  | 5p.0 |
| SDR28C2 M. domestica    | VSK--ADFPgTDHDTLNYFRNVYLPASKEIFQTLGQSPEDVAqaiVRVIDSTQPPLRYT  | 5p.0 |
| SDR28C2 G. gallus       | AER--ADYSQTDPEtAAIFtdLYLRNSRDVfASLGQSPEDIAehTLRVIEAARPPFRHQT | 5p.0 |
| SDR28C2 A. carolinensis | VAR--SEFPgADAATVRYfKEVYLPASHEIFtTMGQTPESVakavVNVIAKERPPFRtQT | 5p.0 |
| SDR28C2 X. tropicalis.  | AIr--GDYSKTDLEtAEMfINfYlKNtKAIFSSLGQTPEDVAehILRVITMEEPpFRHQT | 5p.0 |
| SDR28C2 I. punctatus    | VAK--MEFPgADADTVRYfKdVYMpSSIdIFeAMGQTPDDIAkctKKVIESSNPRFRNLT | 5p.0 |

\* \* \* \* \*

|                         |                                                              |
|-------------------------|--------------------------------------------------------------|
| SDR28C1 H. sapiens      | TERFLPLLRMLDDPSGSNYVTAMHREVFGDVPakAEAGAEAGGGAGPGAEdEAGRGAVG  |
| SDR28C1 P. abelii       | TERFLPLLRMLDDPSGSNYVTAMHREVFGDDPAkAE---AGGGAGPGAGAEAGPSGVG   |
| SDR28C1 M. musculus     | TNRFLPLARMRTEDPSGSSyVAAMHQEAfSNLQtQENAK---AGAQVPGVSDtASSALIC |
| SDR28C1 M. domestica    | TEHFLPLAGLRfSDPGGSQYVEAMHhAVfTELEEGEAQ---SGSFHPEASpQ-----    |
| SDR28C1 G. gallus       | ARLPAPLARLRPGGPDGADYVRAMHDFVfGPGEAEEQp-----                  |
| SDR28C1 X. tropicalis.  | TQFFMPLIKLKLsCTGGSEYVRAMHkFVfSGTKQKEHEK-----                 |
| SDR28C1 D. rerio        | NRALLPMSSLKLtSMdGSQYIRAMSKLIfSSPGTDaQK-----                  |
| SDR28C2 H. sapiens      | NIRYSPLTTLKtVDSSGSlyVRTThRLLFRCPRLlNLGL-----QCL---SCGC       |
| SDR28C2 P. paniscus     | NIRYSPLTTLKtVDSSGSlyVRTThRLLFRCPRLlNLGL-----QCL---SCGC       |
| SDR28C2 M. musculus     | NTRYLPLtALKAMdPSGSlyVKtAhRLLFRWPHLLNLGL-----RCL---ACGC       |
| SDR28C2 M. domestica    | NARYMPLIAlKYADpSGdLSVrTSYRLLFRGQHfFRlSL-----CCLRfLSGNC       |
| SDR28C2 G. gallus       | NAAYTPMAALKhADpSGALMTEAfYKLvFKYGAVLRfGL-----RAIRLLRWKA       |
| SDR28C2 A. carolinensis | NTLYTPLVAlKYADtSGdLSVGtYYNLLFRfTGLfHLSM-----SCLKCItCSC       |
| SDR28C2 X. tropicalis   | NQVYTPVtAlKYADpSGELVNDIfYKLvFHhDTLMQASL-----RAIKLIrWKA       |
| SDR28C2 I. punctatus    | NSLYTPiVAMKYAdETGGLSVHtFYNLLfNFgSLMHITM-----SILKCItCSC       |

\* \* \*

|                       |                                  |
|-----------------------|----------------------------------|
| SDR28C1 H. sapiens    | DPELGDPpAAPQ-----                |
| SDR28C1 P. abelii     | DPELGDPpAARQ-----                |
| SDR28C1 M. musculus   | LPECAIPRVASELGWSASDKPGQDNsCYQQKI |
| SDR28C1 M. domestica  | -----                            |
| SDR28C1 G. gallus     | -----                            |
| SDR28C1 X. tropicalis | -----                            |
| SDR28C1 D. rerio      | -----                            |
| SDR28C2 H. sapiens    | LPTRVRPR-----                    |

```

SDR28C2 P. paniscus      LPMRVRPR-----
SDR28C2 M. musculus      LPTRVWPR---QTEQN-----
SDR28C2 M. domestica     LRPKVSFM-----
SDR28C2 G. gallus        QKVKAGAR---LLGFK-----
SDR28C2 A. carolinensis  FRRRVTPA-----
SDR28C2 I. punctatus     LRRRTISP---D-----
SDR28C2 X. tropicalis    HKVQQGAR---MLGLI-----

```

Figure S22. Alignment of the vertebrate SDR28C family variants. For further details see Fig. S13.

\* symbol marks the position of identical amino acid residues of the aligned SDR protein sequences.

|         |                 |                                                              |           |
|---------|-----------------|--------------------------------------------------------------|-----------|
| SDR32C1 | H. sapiens      | -----MVSPATrkSLPKVKAMDFIT                                    | 1p.1      |
| SDR32C1 | P. troglodytes  | -----MVSPATrkSLPKVKAMDFIT                                    | 1p.1      |
| SDR32C1 | M. musculus     | -----MISPSFrkGMLKERVMDLAS                                    | 1p.1      |
| SDR32C1 | M. domestica    | MALRHFLLGREKLIYHGLSGNqEDLLTLKIFKGVCQKILKPNASVerIVLKGKLM DYIT | 1p.0 2p.1 |
| SDR32C1 | G. gallus       | -----MDL-T                                                   |           |
| SDR32C1 | A. carolinensis | -----MGL-P                                                   |           |
| SDR32C1 | X. tropicalis   | -----MFIFPRKRVYGVKPM DL-T                                    |           |
| SDR32C1 | D. rerio        | -----MGQSLRHMERAL                                            |           |
| SDR32C2 | H. sapiens      | -----MGV-M                                                   |           |
| SDR32C2 | P. troglodytes  | -----MGV-M                                                   |           |
| SDR32C2 | M. musculus     | -----                                                        |           |
| SDR32C2 | M. domestica    | -----MSLFKTL-----IVLSSYPT-LTLKSKMGI-M                        |           |
| SDR32C2 | G. gallus       | -----MGI-L                                                   |           |
| SDR32C2 | A. carolinensis | -----MGV-L                                                   |           |
| SDR32C2 | X. tropicalis   | -----MGF-L                                                   |           |
| SDR32C2 | D. rerio        | -----MAV-P                                                   |           |

|           |                 |                                                                 |      |
|-----------|-----------------|-----------------------------------------------------------------|------|
| x x x     |                 |                                                                 |      |
| SDR32C1   | H. sapiens      | STAILP-LLFGCLGVFGLFRLLQWVRGKAYLRNAV VVITGATSGLGkeCAKV FYAAGAKL  | 2p.2 |
| SDR32C1   | P. troglodytes  | STAILP-LLFGCLGVFGLFRLLQWVRGKAYLRNAV VVITGATSGLGkeCAKV FYAAGAKL  | 2p.2 |
| SDR32C1   | M. musculus     | QTTILP-LLFGCLGIFSLFRLLQRI RSKAYLRNAV VVITGATSGLGreCAKV FHAAGAKL | 2p.2 |
| SDR32C1   | M. domestica    | STAIIP-LLVGCMGIFGLFRFLQWIRMKAYIQDSVV VITGATSGLGkeCAKV FYTAGAKL  | 3p.2 |
| SDR32C1   | G. gallus       | STVIIP-LLFGSLGLFSLFRLLQWMM RRAYLRGAV VVITGATSGLGkeCAKAFH AAGSRL | 1p.2 |
| SDR32C1   | A. carolinensis | SAAVLP-LLFGSLGLGVFWLLRRMR AKAYLKDAV VVITGATSGLGkeCAKTFH AAGSKL  | 1p.2 |
| SDR32C1   | X. tropicalis   | TWAIFF-LLLSIGVSYLYKLLQRL RSGAYLQDAV VVITGATSGLGreCAKV FYAAGTRL  | 1p.2 |
| SDR32C1   | D. rerio        | GVGIGP-LAAGTVGLLILKVIQRLRR RPNIQDKV VVITGASSGLGkeCARVFH AAGARL  | 1p.2 |
| SDR32C2   | H. sapiens      | AMLMLPLLLLGISGLLFYIQEVSRL WSKSAVQN KVVVITDAISGLGkeCARVFHTGGARL  | 1p.2 |
| SDR32C2   | P. troglodytes  | AMLMLPLLLLGISGLLFYIQEVSRL WSKSAVQN KVVVITDAISGLGkeCARVFHTGGARL  | 1p.2 |
| SDR32C2   | M. musculus     | ---MLPLLLLGISGLLFYIQEASRL WSKSAVQN KVVVITDAISGLGkeCARVFHAGGARL  | 1p.2 |
| SDR32C2   | M. domestica    | AVLMLPLLLLAISGILFYIQEVSRL WSKSAVQN KVVVITDAISGLGkeCSRLFHAGGARL  | 1p.2 |
| SDR32C2   | A. carolinensis | GVLILPLLVVVISGVVYIYRTVIQM MSKSAVRS KVVVITDALSGVGkeCSHV FHAGGARL | 1p.2 |
| SDR32C2   | G. gallus       | AVFALPLLLLGISGIIYIYQTVIWL VSKSAVQN KVVVITDAISGLGkeCSRVFHSGGARL  | 1p.2 |
| SDR32C2   | X. tropicalis   | TFLIVPPLLILGISGIVYIYREVVR LMSRSAL KNKVVVITDAISGLGkeCSRVFHSAGARL | 1p.2 |
| SDR32C2   | D. rerio        | SVMVLPLLIVVFAGVYYVYNEVMR FMSKSVRN KVVVITDAVSGMGseCARLFHAGGARL   | 1p.2 |
| * * * * * |                 |                                                                 |      |

|             |                 |                                                                  |      |
|-------------|-----------------|------------------------------------------------------------------|------|
| SDR32C1     | H. sapiens      | VLCGRNGGALEELIRELTASHATkvQTHKPYLVTFDLTDSGAIVAAAAEILQCFGYVDIL     | 3p.0 |
| SDR32C1     | P. troglodytes  | VLCGRNGGALEELIRELTASHATkvQTHKPYLVTFDLTDSGAIVAAAAEILQCFGYVDIL     | 3p.0 |
| SDR32C1     | M. musculus     | VLCGRNVKALEELSRELAGSS--qgQTHQP FVVTFDLADPGTIAAAAAEILQCFGYVDVL    | 3p.0 |
| SDR32C1     | M. domestica    | ILCGRNNERLEELIRELIATNIKkt--HRPHAVVFDLAESKTIVPAANEILKYSGHVDIL     | 4p.0 |
| SDR32C1     | G. gallus       | VLCGRDSEKLDLAQELSAMTDHRKniHKPHTVVFDLSDTKITLNAEEIILKHLGHVDIL      | 2p.0 |
| SDR32C1     | A. carolinensis | VLCGRNGERLRDLLRELSATADPTKnpHQHHTVVFDLSDIKAVVSAAEEIILKCVDHVDIL    | 2p.0 |
| SDR32C1     | X. tropicalis   | VLCGRSEEGKKNLVQELSQMRIKSAqLHKPHMVI FDLSDVEAVNSAANEIILHLTGRVDIL   | 2p.0 |
| SDR32C1     | D. rerio        | ILCGRDQRRQLQEVVEELRNKTYGKTqtYTPCTVTFDL SNTSVVCSAAAEIILKCHGHIDVL  | 2p.0 |
| SDR32C2     | H. sapiens      | VLCGKNWERLENLYDALISVADPSktTFTPKLVLLDLSDISCPDVAK EVLD CYGCV DIL   | 2p.0 |
| SDR32C2     | P. troglodytes  | VLCGKNWERLENLYDALISVADPSktTFTPKLVLLDLSDISCPDVAK EVLD CYGCV DIL   | 2p.0 |
| SDR32C2     | M. musculus     | VLCGKNWEGLESYATLTSVADPSkt-FTPKLVLLDLSDISCPQDVAK EVLD CYGCV DIL   | 2p.0 |
| SDR32C2     | M. domestica    | VLCGKNWEKLEILYDALISVADPSkt-FTPKLVLLDLSDISCPQDVAK EILD CYGCV DIL  | 2p.0 |
| SDR32C2     | G. gallus       | VLCGRTWEEKLEALYDALISVADPSkt-YTPKLVLLDISDTDYIQDVAK EILN CYGCV DIL | 2p.0 |
| SDR32C2     | A. carolinensis | VLCGKHLDNLEALYDSL TSAADPTat-FTPKLVLLDLSDVNCIQDVAK EILD CYGCV DIL | 2p.0 |
| SDR32C2     | X. tropicalis   | VLCGKTWEKLEALHDALISVADPSvt-FTPKLVLLDISDINNMEAMGKEIQDCYGCVDVL     | 2p.0 |
| SDR32C2     | D. rerio        | VLCGPSWDKLESYDSLCSGSDPSqt-FTPKLVLLDFSDMENISDVVSEICECYGCVDVL      | 2p.0 |
| *** * * * * |                 |                                                                  |      |

|         |                |                                                               |      |
|---------|----------------|---------------------------------------------------------------|------|
| SDR32C1 | H. sapiens     | VNNAGISYRGTIMDTTVDVDKRVMETNYFGPVALTkaLLPSMIKRRQGHIVA ISSIQGKM | 4p.2 |
| SDR32C1 | P. troglodytes | VNNAGISYRGTIMDTTVDVDKRVMETNYFGPVALTkaLLPSMIKRRQGHIVA ISSIQGKI | 4p.2 |

|         |                 |                                                                |      |
|---------|-----------------|----------------------------------------------------------------|------|
| SDR32C1 | M. musculus     | INNAGISYRGTISDTIVDVDRKVMETNYFGPVALTkaLLPSMVERKQGHIVAISISSQGGKI | 4p.2 |
| SDR32C1 | M. domestica    | INNAGVSYRGTIMDTALEVDKKVMETNYFGPVALTkaILPSMIEKKQGHIVVISSIQGGKI  | 5p.2 |
| SDR32C1 | G. gallus       | INNAGISYRGITVDTGLDVDDKKVMETNYFGPIALTkaLLPSMIKRRQGHIVAISSVQGGKI | 3p.2 |
| SDR32C1 | A. carolinensis | INNAGISYRGSIAETVIEVDRKVMETNYFGPIALTkaLLPSMIRRRKGHVVAISSVQGGKI  | 3p.2 |
| SDR32C1 | X. tropicalis   | INNAGISYRGITLDTKVSVDKVMMDNYFGPVALTkaLIPSMIKNRRGHIVVISSVQGGKI   | 3p.2 |
| SDR32C1 | D. rerio        | INNAGVSYRGNILDTHTVSVQREVMETNYFGPVALTqaILPSMVDRGSGHIVVISSVQGGKI | 3p.2 |
| SDR32C2 | H. sapiens      | INNASVKVKGPAHKISLELDKKIMDANYFGPITLTkaLLPNMISRRTGQIVLVNNIQGGKI  | 3p.2 |
| SDR32C2 | P. troglodytes  | INNASVKVKGPAHKISLELDKKIMDANYFGPITLTkaLLPNMISRRTGQIVLVNNIQGGKI  | 3p.2 |
| SDR32C2 | M. musculus     | INNASVKVKGPAHKISLELDKKIMDANYFGPITLTkaLLPNMISRRTGQIVLVNNIQAKF   | 3p.2 |
| SDR32C2 | M. domestica    | INNASKVKKGPAQNISLELDKKIMDVNYFGPITLTkaLLPNMISRRTGQIVLVNNIQGRF   | 3p.2 |
| SDR32C2 | G. gallus       | INNASKVKKGAVQSISELDKKIMDANYFGPITLTkaLLPNMISRRTGQIVLINSIQGGKI   | 3p.2 |
| SDR32C2 | A. carolinensis | INNASTKLKGTQVNISLELDKKIMDANYFGPITLTkaLIPNMISRRTGQIVLVNNIQGGKI  | 3p.2 |
| SDR32C2 | X. tropicalis   | INNASKMKKGLQSVSELDKKIMDANYFGPITLVkaILPHMISRRTGQIVLVNTIQGGKI    | 3p.2 |
| SDR32C2 | D. rerio        | ICNSSMKVKAPVQNLSLEMDKTIMDVNYFGPITLakgVLPMLITRRTGQFVLVNSIQGKL   | 3p.2 |

\* \* \* \* \*

|         |                 |                                                              |      |
|---------|-----------------|--------------------------------------------------------------|------|
| SDR32C1 | H. sapiens      | SIPFRSayAASKHATQAFFDCLRAEMEQQYEIEVTVISPGYIHTNLSVNAIT-----    | 5p.2 |
| SDR32C1 | P. troglodytes  | SIPFRSayAASKHATQAFFDCLRAEMEQQYEIEVTVISPGYIHTNLSVNAIT-----    | 5p.2 |
| SDR32C1 | M. musculus     | SIPFRSaySASKHATQAFFDCLRAEMEEANIKVTVISPGYIHTNLSVNAIT-----     | 5p.2 |
| SDR32C1 | M. domestica    | SVFPRSayAASKHATQAFFDCLRAEVEQHDIEVTVISPGYIQTNLSLNALT-----     | 6p.2 |
| SDR32C1 | G. gallus       | SIPFRSayAASKHATQAFFDCLRAEVEQYDIDVTVISPGYIQTNLSLNALT-----     | 4p.2 |
| SDR32C1 | A. carolinensis | GLFPRSayAASKHAFQAFFDCLRAEVEQYGVVTVVSPGYIQTNLSLNALT-----      | 4p.2 |
| SDR32C1 | X. tropicalis   | SIPFRSaySASKHATQAFFDCLRAEMSPYEIDVTVNPGYIKTNLSLNALT-----      | 4p.2 |
| SDR32C1 | D. rerio        | SIPYRSayAASKHAMQAYYDCLRAEVDLSGLHVSVLSPGYVRTNMSINAVT-----     | 4p.2 |
| SDR32C2 | H. sapiens      | GIPFRTyAASKHAALGFFDCLRAEVEEYDVVISTVSPTFIRSYHVY-----P         | 4p.2 |
| SDR32C2 | P. troglodytes  | GIPFRTyAASKHAALGFFDCLRAEVEEYDVVISTVSPTFIRSYHVY-----P         | 4p.2 |
| SDR32C2 | M. musculus     | GIPFRTyAASKHAVMGFFDCLRAEVEEYDVVISTVSPTFIRSYRAS-----P         | 4p.2 |
| SDR32C2 | M. domestica    | GIPLRTayAASKHAAQGFFDCLRAEVEEYDVVISTVSPTFIRSYHMY-----T        | 4p.2 |
| SDR32C2 | G. gallus       | GVPFRaayAASKHAAVGFFDCLRAEVEEYDVVISTVSPTFIRSYHMY-----P        | 4p.2 |
| SDR32C2 | A. carolinensis | GVPFRaayAASKHAALGFFDCLRAELQEFQVCVSTVTPSFIRSYSVQ-----P        | 4p.2 |
| SDR32C2 | X. tropicalis   | GVPFRaayAASKHAIQGFFDCLRAEVEEYDVVISTVSPTFIRSYHVQ-----P        | 4p.2 |
| SDR32C2 | D. rerio        | ALPFRTCyAASKHAVQAFFDCLRAEVEEYFISVSTISHTFINAGAENATPTEATPITATP | 4p.2 |

\* \* \* \* \*

|         |                 |                                                                |      |
|---------|-----------------|----------------------------------------------------------------|------|
| SDR32C1 | H. sapiens      | ----ADGSRYgv-MDTTAAQGRSPVEVAQDVLAAVGKKKKDVILADLLPSLAVYLRTLAP   | 6p.2 |
| SDR32C1 | P. troglodytes  | ----ADGSRYgv-MDTTAAQGRSPVEVAQDVLAAVGKKKKDVILADLLPFLAVYLRTLAP   | 6p.2 |
| SDR32C1 | M. musculus     | ----ADGSRYga-LDKNTAQGRSAEVAQDVFDAVGKKKKDVLLTDFVPSMAVYIRTLAP    | 6p.2 |
| SDR32C1 | M. domestica    | ----ADGSTYgv-MDKNTANGRSPTVEVAYAVLTAVGKKKKKEVMVADLLPCLAVSLRTLFP | 7p.2 |
| SDR32C1 | G. gallus       | ----ADGSRYgv-MDKNTAEGKTAEEVAQVVLCAVGQKKKEVLIAGLKPSLAVYLRLNLF   | 5p.2 |
| SDR32C1 | A. carolinensis | ----ADGSQYgv-MDKNTARGKAAAEVAQVVLDAVGKKKEVTVAGFLPSLVVYLRLTLC    | 5p.2 |
| SDR32C1 | X. tropicalis   | ----GDGSNYgv-MDNNTAEGRTPEEVAQTVLRAVGERRKELLVAGLVPTLAVYLRTLAP   | 5p.2 |
| SDR32C1 | D. rerio        | ----GDGSKYgv-MDRTTATGADPVDVAKDILKAVCQKKKDVVMAGLGPTTAIYLRTLWP   | 5p.2 |
| SDR32C2 | H. sapiens      | EQGNWEASIWkfFFRKLTYGVHPVEVAEEVMRTVRRKKQEVFMANPIPKAAVYVRTFFF    | 5p.2 |
| SDR32C2 | P. troglodytes  | EQGNWEASIWkfFFRKLTYGVHPVEVAEEVMRTVRRKKQEVFMANPIPKAAVYVRTFFF    | 5p.2 |
| SDR32C2 | M. musculus     | EQRNWETSICKkfFCRKLTYGVHPVEVAEEVMRTVRRKKQEVFMANPVPKAAVFIRTF     | 5p.2 |
| SDR32C2 | M. domestica    | EPGNWEASIWkfFFRKFA-YGVHPVEVAEEVMRTVRRKKQEVFIANPIPKAAIYIRTF     | 5p.2 |
| SDR32C2 | G. gallus       | APGNWEASIWkfFFRKVT-YGVHPAEVAEEVLRVTSSKKQEVLMANPIPRAAVYIRTF     | 5p.2 |
| SDR32C2 | A. carolinensis | QPSNWESSVWkfLCRKLTYGVHPVEVAEEVLRVTNRKKQEVFMANPIAKAAVYIRTF      | 5p.2 |
| SDR32C2 | X. tropicalis   | QPGNWEASIWkfFFRKLTYGAHPVEVAEEVLRVTNRKKQEVFMANPIPRAAVYIRTF      | 5p.2 |
| SDR32C2 | D. rerio        | TKATPTNPIWayVCSKLNTHGVPQILAREIVRSVNRQSREVFVLAHVPVPTVALYIRALMP  | 5p.2 |

\* \* \* \* \*

|         |                |                       |
|---------|----------------|-----------------------|
| SDR32C1 | H. sapiens     | GLFFSLMASRARKERKSKNS- |
| SDR32C1 | P. troglodytes | GLFFSLMASRARKERKSKNS- |
| SDR32C1 | M. musculus    | GLFFRIMASRARKERKSKSS- |



|         |                 |                        |
|---------|-----------------|------------------------|
| SDR32C1 | M. domestica    | RLFFYIMAMRARKERKGTST-  |
| SDR32C1 | G. gallus       | RLFFNLMAARAKKERKTKDS-  |
| SDR32C1 | A. carolinensis | RLFFAIMASRAQKERKAKAS-  |
| SDR32C1 | X. tropicalis   | TIFFSFMAARAKKERKTKDS-  |
| SDR32C1 | D. rerio        | ALYFRVMASRAKQGTGKEE--  |
| SDR32C2 | H. sapiens      | EFFFAVVACGVKEKLNVP EEG |
| SDR32C2 | P. troglodytes  | EFFFAVVACGVKEKLNVP EEG |
| SDR32C2 | M. musculus     | EFFFAVVACGVKEKLNVP EEG |
| SDR32C2 | M. domestica    | EFFFAVVACGVKEKLNVPEDR  |
| SDR32C2 | G. gallus       | EMFFAIVASGIREKLKTEQEN  |
| SDR32C2 | A. carolinensis | ELFFAVVAAGVKEKQKIEDEK  |
| SDR32C2 | X. tropicalis   | ELFFAVVATGVKEKHFVEEEK  |
| SDR32C2 | D. rerio        | GCFFSVVSAGVRDGAMAEQLK  |

\*

Figure S23. Alignment of the vertebrate SDR32C family variants. For further details see Fig. S13, Table S23.

\* symbol marks the position of identical amino acid residues of the aligned SDR protein sequences.

|         |                |                                                              |
|---------|----------------|--------------------------------------------------------------|
| SDR42E1 | H. sapiens     | -----                                                        |
| SDR42E1 | P. troglodytes | -----                                                        |
| SDR42E1 | M. musculus    | -----                                                        |
| SDR42E1 | S. harrisii    | -----                                                        |
| SDR42E1 | G. gallus      | -----                                                        |
| SDR42E1 | P. bivittatus  | -----                                                        |
| SDR42E1 | X. tropicalis  | -----                                                        |
| SDR42E1 | L. oculatus    | -----                                                        |
| SDR42E2 | H. sapiens     | MKSNPPRSSLEACKAAGQGEKSCPVCQACGEVSGPRSGSGSESRPAPKPGAIPGPGLGPK |
| SDR42E2 | P. troglodytes | MKSNPPRSSLEACKAAGQGEKSCPVCQACGEVSGPRSGSGSESRPAPKPGAIPGPGLGPK |
| SDR42E2 | M. musculus    | MKTNPAGSPLETCQTAGQGEKGCPCVCQACRGTSGLGSASESGLRPGPGVVLDSGLGPG  |
| SDR42E2 | S. harrisii    | -----                                                        |
| SDR42E2 | G. gallus      | -----                                                        |
| SDR42E2 | P. bivittatus  | -----                                                        |
| SDR42E2 | X. tropicalis  | -----                                                        |
| SDR42E2 | L. oculatus    | -----                                                        |

|         |                |                                                              |
|---------|----------------|--------------------------------------------------------------|
| SDR42E1 | H. sapiens     | -----                                                        |
| SDR42E1 | P. troglodytes | -----                                                        |
| SDR42E1 | M. musculus    | -----                                                        |
| SDR42E1 | S. harrisii    | -----                                                        |
| SDR42E1 | G. gallus      | -----                                                        |
| SDR42E1 | P. bivittatus  | -----                                                        |
| SDR42E1 | X. tropicalis  | -----                                                        |
| SDR42E1 | L. oculatus    | -----                                                        |
| SDR42E2 | H. sapiens     | AIPGPQAGSGTVPRPGAISGTGPGLGPGPGAGSVPGPGAGSVPLGARSVPGPAGSVPG   |
| SDR42E2 | P. troglodytes | AIPGPQAGSDTVPRPGAISGTGPSLGPFGAGSVPGPGTGSVP-----GPGAGSVPG     |
| SDR42E2 | M. musculus    | SGTSAVPGSGPQPSAVSVTGLRPGTTSGPNATLGPGLGAGSLPGPGARSGLRPGSESVPG |
| SDR42E2 | S. harrisii    | -MAQPKSDSLTVPQAQAPQGKVPQSQPP-QT-----QALQGQAPQSKPSQSQVLQAQ    |
| SDR42E2 | G. gallus      | -----                                                        |
| SDR42E2 | P. bivittatus  | -----                                                        |
| SDR42E2 | X. tropicalis  | -----                                                        |
| SDR42E2 | L. oculatus    | -----                                                        |

|         |                |                                                              |
|---------|----------------|--------------------------------------------------------------|
| SDR42E1 | H. sapiens     | -----                                                        |
| SDR42E1 | P. troglodytes | -----                                                        |
| SDR42E1 | M. musculus    | -----                                                        |
| SDR42E1 | S. harrisii    | -----                                                        |
| SDR42E1 | G. gallus      | -----                                                        |
| SDR42E1 | P. bivittatus  | -----                                                        |
| SDR42E1 | X. tropicalis  | -----                                                        |
| SDR42E1 | L. oculatus    | -----                                                        |
| SDR42E2 | H. sapiens     | PGAGSVPGPGAGSVPGPGAGSGPG--LGGGLGPGVGAGPGAGSVPGPGAGSVPGPGAGS- |
| SDR42E2 | P. troglodytes | LGAGSVPGPGAGSVPGPGAGSGPG--LGAGLGPGLGAGPGAGSVPGPGAGSVPG-----  |
| SDR42E2 | M. musculus    | PGAGSVPGPGAGFPVPQPG-----VGFVPHPGAGSVSQPGAGS-                 |
| SDR42E2 | S. harrisii    | ALQGKVPQSQAQAPQTP-QGQAPQAQIPQGQAP----QGQAPQAKISQGQAPQGQAPQ-  |
| SDR42E2 | G. gallus      | -----MKLAG-----IVCIG                                         |
| SDR42E2 | P. bivittatus  | -----                                                        |
| SDR42E2 | X. tropicalis  | -----MR-----EKEGAYE-----                                     |
| SDR42E2 | L. oculatus    | -----MKPLGEA-----ARAAGAGRDLSHGSSGAPRCCRD                     |

|         |                |       |
|---------|----------------|-------|
| SDR42E1 | H. sapiens     | ----- |
| SDR42E1 | P. troglodytes | ----- |

|                    |                |                                                                |           |
|--------------------|----------------|----------------------------------------------------------------|-----------|
| SDR42E1            | M. musculus    | -----                                                          |           |
| SDR42E1            | S. harrisii    | -----                                                          |           |
| SDR42E1            | G. gallus      | -----                                                          |           |
| SDR42E1            | P. bivittatus  | -----                                                          |           |
| SDR42E1            | X. tropicalis  | -----                                                          |           |
| SDR42E1            | L. oculatus    | -----                                                          |           |
| SDR42E2            | H. sapiens     | -VPGPGAGSVPGAGAGSTPEPELGPGLRQGS--TGPRPS---ESTTTPTTAPQOK----    |           |
| SDR42E2            | P. troglodytes | -----PGAGSTPEPELGPGLRQGS--TGPKPS---ESTTTPTTAPQOK----           |           |
| SDR42E2            | M. musculus    | -VSQPVSESVTSPGSAPLPGGLGPGTRRGSG--TGSDPI---ESVRTPVVPVQOK----    |           |
| SDR42E2            | S. harrisii    | -SQAPQDQ-----VLQSQVPQSQAPQAQALQD---KPPQSQVPNSKPK----           |           |
| SDR42E2            | G. gallus      | EHYGAI-FNMEKKLLC-----ASGH-RGHYFSDRKLPVSEANPWHQPPSSGVR----      |           |
| SDR42E2            | P. bivittatus  | -----MEKPNDPKPSRFY--KCT                                        |           |
| SDR42E2            | X. tropicalis  | --LEGLRSRVEMGDLCTCL-----RNSRPFGRS----IKHRANGVVPHQSQASACT       |           |
| SDR42E2            | L. oculatus    | rcWCAARQRM---ALCRTKGPPARPGQPAGTK-----RR---S--NGVVP-HRSR----    | 1p.1      |
| x x x              |                |                                                                |           |
| SDR42E1            | H. sapiens     | -----MDPKRSQKESVLITGGSGYFGFrIGCALNQNGVHVILFDISSPAQT            | 1p.1      |
| SDR42E1            | P. troglodytes | -----MDPKRSQKETVLITGGSGYFGFrIGCALNQKGVHVILFDISSPAQT            | 1p.1      |
| SDR42E1            | M. musculus    | -----MDSPRFPEETVLITGGGGYFGFrIGCALNQKGARVILFDITQPAQN            | 1p.1      |
| SDR42E1            | S. harrisii    | -----MDLQKSPQETVLITGGGGYFGFrIGCTLCKKGITVILFDINISIQD            | 1p.1      |
| SDR42E1            | G. gallus      | -----MEAGSSAKETVLITGGGGYFGFrIGCTIYKKGVVDVILFDVTKPLQP           | 1p.1      |
| SDR42E1            | P. bivittatus  | -----MERENPNKEAVLITGGSGYFGFrIGSALAKNKVDVILFDVSRPTQE            | 1p.1      |
| SDR42E1            | X. tropicalis  | -----MSSSQHARQTVVITGGGGYFGHrIGCTLHQKGVNVILFDIRKPDLE            | 1p.1      |
| SDR42E1            | L. oculatus    | -----MEQLNQGKTKEMLVITGGGGYFGFrIGALHEAGALVTILFDVQPPSEA          | 1p.1      |
| SDR42E2            | H. sapiens     | -----TQAKPTKAARQKVLVTGGGGYLGFSLGSHLAKSGTSVILLDRRRPQWE          |           |
| SDR42E2            | P. troglodytes | -----TQAKPTKAARQKVLVTGGGGYLGFSLGSHLAKSGTSVILLDCRRPQWE          |           |
| SDR42E2            | M. musculus    | -----TQAKHTQAPRQKVLVTGGGGYLGFSLGSSLAKRGTSVILLDLRRPQWP          |           |
| SDR42E2            | S. harrisii    | -----EQAKPPYPSSQKALVTGGGGYFGFrIGSSSLVRKGVSVVLLDIQHPKWE         |           |
| SDR42E2            | G. gallus      | -----GNAGALKDKAMRAVVTGGGGYFGYKLGALASSGASVVLYDIHKPIWE           |           |
| SDR42E2            | P. bivittatus  | KEDAKLVEKLPESCQSLPKKVSDKTVTGGAGYFGFTLGALAKSGTKVILYDVNLPIWD     |           |
| SDR42E2            | X. tropicalis  | P-----SAHLGTLHAGITKVLVTGGGGYVGHNLACALAQSGISVLLFDINRSQWE        |           |
| SDR42E2            | L. oculatus    | -----GPGWQAAPAGGRALVTGGAGYFGRSLGRALASSGVSVVLLDLHEPRWE          |           |
| *** ** * * * * * * |                |                                                                |           |
| SDR42E1            | H. sapiens     | IPEGIKFIQGDIRHLSVDEKAFQDAD-VTCVFHIASYGMMSGREQLNRNLIKEVNVRGTDN  |           |
| SDR42E1            | P. troglodytes | IPEGIKFIQGDIRHLSVDEKAFQDAD-VTCVFHIASYGMMSGREQLNRNLIKEVNVRGTDN  |           |
| SDR42E1            | M. musculus    | LPEGIKFVCGDIRCLADVETAQDAEKVACVHVHASYGMMSGREQLNKTIIEVNVVGGTEN   |           |
| SDR42E1            | S. harrisii    | IPRGMKLICGDIRCIADLENALQN---VTCVFHIASFGMSGKEQLNHKRIEDVNVKGTEN   |           |
| SDR42E1            | G. gallus      | VPEGIKFMQGNVCCLAEEVEEALKD---VICVFHIASYGMMSGREQLNRKLIEDVNVKGTEN |           |
| SDR42E1            | P. bivittatus  | IPKGVKFVKGDVCDIQEVEAALQG---MSCVFHIASFGMSGREQLNQKRIEEVNIKGTEN   |           |
| SDR42E1            | X. tropicalis  | VPEGIQFVQGDVRSLSQLEDVMTG---ASCVFHTASYGMMSGREQLQWQKIEAVNVKGTEN  |           |
| SDR42E1            | L. oculatus    | IPDGMAFLRGDVREYLEVEGATR---VGCVFHTASYGMMSGREQLDRALIEEVNMRGTEH   |           |
| SDR42E2            | H. sapiens     | LSPETKFIqadVRDEEALYRAFEG---VDCVFHVASYGMSGAEklQKEQIESINVGGTKL   | 1p.0 2p.0 |
| SDR42E2            | P. troglodytes | LSPETKFIqadVRDEEALYRAFEG---VDCVFHVASYGISGAeklQKEQIESINVGGTKL   | 1p.0 2p.0 |
| SDR42E2            | M. musculus    | LPSGTEFVqadVRDEEALYQAFQG---VDCVFHVASYGMSGAEklQKEQIESINVGGTKL   | 1p.0 2p.0 |
| SDR42E2            | S. harrisii    | LPKGVAFIqadIRDGEALYQACEG---VDCVFHVASYGMSGAEklHKEQIESVNIGGTGI   | 1p.0 2p.0 |
| SDR42E2            | G. gallus      | IPNGVVCIqadVRDYDAVFAACEG---ADCVFHVASYGMSGREqlHREEIETVNINGTRF   | 1p.0 2p.0 |
| SDR42E2            | P. bivittatus  | IPKGIILIKsDVRNFSDLYSACEG---VDCLFHAAAYGMTGIEqlHKKHIRSVNIGGTGI   | 1p.0 2p.0 |
| SDR42E2            | X. tropicalis  | IPSGAVFIqgDIRDYNCLYTACEG---VDCIFHVASYGMSGYQqlEKEKIDSINIGGTKL   | 1p.0 2p.0 |
| SDR42E2            | L. oculatus    | IPEGAVFQqsDIRDYDALYKACEG---VDCVFHTASYGMSGPEqlKKEQIESVNVGGTNN   | 2p.0 3p.0 |
| * * * * * * * *    |                |                                                                |           |
| + +                |                |                                                                |           |
| SDR42E1            | H. sapiens     | ILQVCQRRRVPRLVYTSTFNVIFFGGQVIRNGDE-SLPYLPLHLHPDHYSRTKSIAEQKVL  |           |
| SDR42E1            | P. troglodytes | ILQVCQRRSVPRLVYTSTFNVIFFGGQVIRNGDE-SLPYLPLHLHPDHYSRTKSIAEQKVL  |           |
| SDR42E1            | M. musculus    | ILRACLERGVPRLVYTSTFNVIFFGGQVIRNGDE-SLPYLPLHLHPDHYSRTKSIAEKKVL  |           |

|         |                |                |               |                                       |                                        |           |
|---------|----------------|----------------|---------------|---------------------------------------|----------------------------------------|-----------|
| SDR42E1 | S. harrisii    | VLEACRRKGVSR   | LVYTSTYNVVF   | GGQVIMNGDE-SLPYLPLHLHPDHYSRTKSVADKKVL |                                        |           |
| SDR42E1 | G. gallus      | VIQACKSTGVSS   | LVYTSTYNVIF   | GGQIIENGDE-SLPYLPLHLHPDHYSRTKSLAEMKVL |                                        |           |
| SDR42E1 | P. bivittatus  | VIETCRKVGISK   | LVYTSTYNVVF   | GGQVIENGDE-SWPYLPLHLHPDHYSRTKALAEMKVL |                                        |           |
| SDR42E1 | X. tropicalis  | IIQACINKNVKRL  | VYTSTFNVVF    | GGQTIENGDE-SLPYLPQDAFVDNYSRTKTIAEAFVL |                                        |           |
| SDR42E1 | L. oculatus    | VIACVGNAPVRL   | VYTSTFNVVF    | GGQVIENGDE-SLPYLPLHLHPDHYSRTKSLAEMAVL |                                        |           |
| SDR42E2 | H. sapiens     | VIDvCVR        | RRVPRLIYTSTVN | NAFVG                                 | GGKPIEQGDEDSVPYFPLDehVDHYSRTKAIADQLTL  | 3p.2 4p.0 |
| SDR42E2 | P. troglodytes | VIDvCVR        | RRVPRLIYTSTVN | NAFVG                                 | GGKPIEQGDEDSVPYFPLDehVDHYSRTKAIADQLTL  | 3p.2 4p.0 |
| SDR42E2 | M. musculus    | VInvCVR        | RRVPRLVYTSTVN | TVFVG                                 | GGKPIEQGNEESIPYFPLDkhMDHYSRTKAIADQLTL  | 3p.2 4p.0 |
| SDR42E2 | S. harrisii    | VIDvCIKRQIPRL  | VYTSTVN       | NVVF                                  | GGKPIVQGGDEDSVPYFPLEkhIDHYSRTKAVADQMIL | 3p.2 4p.0 |
| SDR42E2 | G. gallus      | IIdaCKQRNITRLI | YTSTVN        | NVVF                                  | GGLPIEDGDEETVPYFPIEkhVDHYSRTKSIAEQMVL  | 3p.2 4p.0 |
| SDR42E2 | P. bivittatus  | VLevCKRQSI     | PRLIYTSSVN    | NVVF                                  | AGQTIIDGDEATVPYFPLEqqVNEYSRTKSIAEQMVL  | 3p.2 4p.0 |
| SDR42E2 | X. tropicalis  | VIDvCVQRSIPRLI | YTSTVN        | NVVF                                  | GGNPIEDGDEETVTYFPLEkqIDPYSRSKTIADQMIL  | 3p.2 4p.0 |
| SDR42E2 | L. oculatus    | VInvCLQRSIPRLV | YTSTVN        | NVVF                                  | AGSPIEQGDEETVPCVPLDhVDHYSRTKAIADQAVL   | 4p.2 5p.0 |

\* \* \* \* \*

|         |                |              |              |                                       |           |  |
|---------|----------------|--------------|--------------|---------------------------------------|-----------|--|
| SDR42E1 | H. sapiens     | EANATPLDRGDG | VLRTCALRPAGI | YGPEQRHLPRIVSYIEKGLFKFVYGDPRSLVEFVH   |           |  |
| SDR42E1 | P. troglodytes | EANATPLDRGDG | VLRTCALRPAGI | YGPEQRHLPRIVSYIEKGLFKFVYGDPRSLVEFVH   |           |  |
| SDR42E1 | M. musculus    | EANGLAFKQGDG | LRTCAIRPAGI  | YGAGEQRHLPRIVSYIERGLFRFVYGDPSLVEFVH   |           |  |
| SDR42E1 | S. harrisii    | EANGTALDRGTG | VLRTCVLRSAGI | YGPEQRHLPRIVKYIEKGLFKFVYGDPSLVEFVH    |           |  |
| SDR42E1 | G. gallus      | KANGTELGNKG  | VLRTCALRPAGI | YGPEQRHLPRIVSYIERGLFKFVYGDPSLVEFVH    |           |  |
| SDR42E1 | P. bivittatus  | EANGTVLRDGG  | LRTCALRPAGI  | YGPEQRHLPRIVNYIERGWFRFVYGDPSLVEFVH    |           |  |
| SDR42E1 | X. tropicalis  | KMNNQELKNKSG | FLKTCSLRAGI  | YGPEQRHLPRIRSVLEKGMFLFIYGDN-PLVQFVH   |           |  |
| SDR42E1 | L. oculatus    | RANGTALRGGAG | LLRTCALRPAGI | YGPERRHLPRIVRYIESGIFRFVYGDAGSLVEFVH   |           |  |
| SDR42E2 | H. sapiens     | MANGMPLpg-GG | TLRTCVLRPPGI | YGPEEQRHLPRVagHIKKRLFMFRFGDHKARMNWVH  | 5p.2 6p.0 |  |
| SDR42E2 | P. troglodytes | MANGTPLpg-GG | TLRTCVLRPPGI | YGPEEQRHLPRVagHIKKRLFMFRFGDRKARMNWVH  | 5p.2 6p.0 |  |
| SDR42E2 | M. musculus    | MANGTPLlg-GG | TLRTCVLRPPGI | YGPEEQRHLPRVashIKKRLFMFRFGDRKTRMNWVH  | 5p.2 6p.0 |  |
| SDR42E2 | S. harrisii    | TCNGTPLpg-GG | TLRTCVLRPPGI | YGPEEQRHLPRVagSIRKRLFTFKFGDPRTRMNWVH  | 5p.2 6p.0 |  |
| SDR42E2 | G. gallus      | AANGTPLag-GG | VLYTSLVRPPGI | YGPEEQRHLPRLaNIERGILSKFKGDPSPAKMNWVH  | 5p.2 6p.0 |  |
| SDR42E2 | P. bivittatus  | AANGSRLag-GG | KLHTCAIRPPGI | YGPEEQRHLPRLaNIERGIFNTRVGDPELTMNWVH   | 5p.2 6p.0 |  |
| SDR42E2 | X. tropicalis  | AADGRPLkg-GG | KLHTCVLRPPGI | YGPEEQRHLPRLvsNIEKGLIFFTVGSQKTFNLWVH  | 5p.2 6p.0 |  |
| SDR42E2 | L. oculatus    | AANGRTLrg-GG | LLRTCVLRPPGI | YGPEERRHLQQRVavNIERRLFSFSFGDREAKMNWVH | 6p.2 7p.0 |  |

\* \* \* \* \*

|         |                |         |              |                                               |           |  |
|---------|----------------|---------|--------------|-----------------------------------------------|-----------|--|
| SDR42E1 | H. sapiens     | VDNLVQA | HILASEALRADK | KGHIASGQPYFISDGRPVNNFEFFRPLVEGLGYTFPSTRLPL    |           |  |
| SDR42E1 | P. troglodytes | VDNLVQA | HILASEALRADK | KGHIASGQPYFISDGRPVNNFEFFRPLVEGLGYTFPSTRLPL    |           |  |
| SDR42E1 | M. musculus    | VDNLAKA | HILASEALKADK | GHVASGQPYFISDGRPVNNFEFFRPLVEGLGYTFPSTRLPL     |           |  |
| SDR42E1 | S. harrisii    | VDNLVQA | HILASEALKADK | KKHIASGQAYFISDGRPVNNFEFFRPLVEGLGYFPFTIRLPL    |           |  |
| SDR42E1 | G. gallus      | VDNLVQA | HILAFEALKANK | KKHIAAGQAYFISDGRPVNNFEFFRPLVEGLGYKFPTCRPL     |           |  |
| SDR42E1 | P. bivittatus  | VDNLVQA | HILAAEALGAT  | KKHIAAGQPYFISDGRPVNNFEFFRPLVENLGYAFPTLHLPL    |           |  |
| SDR42E1 | X. tropicalis  | VDNLISA | HILAAEALTSEK | KYIAAGQPYFISDGPPVNNFDFRPFVEGLGYKFPTLQLPL      |           |  |
| SDR42E1 | L. oculatus    | VDNLAAA | HVLAAEALTA   | AKRRAAGQAYFISDGRPVNNFEFFRPLVEGLGYFPFRLRLPV    |           |  |
| SDR42E2 | H. sapiens     | VHNLVQA | HVLAAEALT    | TAKGYVasGQAYYINDGESVNLFEWMAPlfEKLGYSQPWIQVPT  | 7p.0 8p.0 |  |
| SDR42E2 | P. troglodytes | VHNLVQA | HVLAAEALT    | TAKGYVasGQAYYINDGESVNLFEWMAPlfEKLGYSQPWIQVPT  | 7p.0 8p.0 |  |
| SDR42E2 | M. musculus    | VQNLVQA | HMLAAEGLT    | MAKGYVasGQAYYINDGESVNLFEWMAPlfEKLGYSQPWIQVPT  | 7p.0 8p.0 |  |
| SDR42E2 | S. harrisii    | VQNLVQA | HILAAEALT    | TANKKYIasGQAYYINDGESVNLFEWMSPlfDKMGYSRPWIQIPT | 7p.0 8p.0 |  |
| SDR42E2 | G. gallus      | VENLVQA | QILAAEALT    | PEKNYIasGQVYFIHDGEKFNLFEWLAPlfERLGCSKPWIPPT   | 7p.0 8p.0 |  |
| SDR42E2 | P. bivittatus  | VENLVQA | HILAAKALT    | PEMNYIasGQVYFIHDEKVNLFEWLSPlfEGLGSHNPWIRVPV   | 7p.0 8p.0 |  |
| SDR42E2 | X. tropicalis  | LYNLVEA | HILAAEALT    | ASKGYIasGQSYFIHDGENVNIYEFLLHPlfEKLAFSDPWISLPY | 7p.0 8p.0 |  |
| SDR42E2 | L. oculatus    | VDNLVMA | HVLAAEGLT    | AGKGFVasGQAYYINDGESVNLFEWLTPlfEKLGYSRPLIHLPV  | 8p.0 9p.0 |  |

\* \* \* \* \*

|         |                |              |                |                                      |
|---------|----------------|--------------|----------------|--------------------------------------|
| SDR42E1 | H. sapiens     | TLVYCFAFLTEM | VHFILGRLYNFQ   | PFLTRTEVYKTVGTHYFSLEKAKKELGYKAQPFDLQ |
| SDR42E1 | P. troglodytes | TLVYCFAFLTEM | VHFILGRLYNFQ   | PFLTRTEVYKTVGTHYFSLEKAKKELGYKAQPFDLQ |
| SDR42E1 | M. musculus    | TLIYCLAFLVEM | THFIVGRLYNFQ   | PFLTRTEVYKTVGTHYFSLEKAKKELGFEPQPFDLQ |
| SDR42E1 | S. harrisii    | NLIYFIAFMTE  | VMVYFLLGRFYNFQ | PFLTRA                               |
| SDR42E1 | G. gallus      | SLVYFFAFLTE  | VHLLVGHVYNFQ   | PLLTRTEVYKTVGTHYFSMEKARKELGYPQKYSLN  |

|         |                |                                                               |             |
|---------|----------------|---------------------------------------------------------------|-------------|
| SDR42E1 | P. bivittatus  | SLVYFFAFFTELVHFVVGRLYNFQPLLTRTEVYKTGVTHFFSLAKARRELGYEPQQYSLG  |             |
| SDR42E1 | X. tropicalis  | WFIYFLAFLIEWIHFFVSPVCDQFPFLTRSEVCKTGVTHYFSIEKAKRELGFEPQPFMTQ  |             |
| SDR42E1 | L. oculatus    | SLVYFFAFLTEMVHFLVGRLYNFQPLLTRTEVYKTGVTHYFSMAKAEELGYEPRRYSLD   |             |
| SDR42E2 | H. sapiens     | SWVYLtaAVMERLHLALRPICSLPPLLTRSevRSVAVTHTFQIAKARAQLGYAPDKFRFA  | 9p.2 10p.0  |
| SDR42E2 | P. troglodytes | SWVYLtaAVMERLHLALRPICSLPPLLTRSevRSVAVTHTFQIAKARAQLGYAPDKFRFA  | 9p.2 10p.0  |
| SDR42E2 | M. musculus    | SCVYLtaAVMEYLHLALRPICITIPPLLTRSevLSVAVTHTFQIAKARTQLGYAPDKFSFA | 9p.2 10p.0  |
| SDR42E2 | S. harrisii    | SLAYLsaSGMEYLHLALKPICDFPPLLTRSevWSIAVTHTFQIRKARDHLGYTPEKFafa  | 9p.2 10p.0  |
| SDR42E2 | G. gallus      | SLVYAsaTVMEHLHLILKPLVELSPLLTRNevQNISTHTTFRIDKARRQLGYSPEKFTFA  | 9p.2 10p.0  |
| SDR42E2 | P. bivittatus  | FLVHLsaVIMENVHSMLLPIVEITPPITRNeVHNMACTHTFKIDKARAHLGYPQKYSFA   | 9p.2 10p.0  |
| SDR42E2 | X. tropicalis  | SLVYDsaIFFEYLHLALRPFVNLNPVLTRYevLKISKTHTFRINKACKELGYCPKKFSFA  | 9p.2 10p.0  |
| SDR42E2 | L. oculatus    | SLVYTaaILMECLHVALRPVVGIPLLFTRNevRNIAVTHTTFRIDKARRQLGFTPQRRDLA | 10p.2 11p.0 |
|         |                | * * * * *                                                     |             |
| SDR42E1 | H. sapiens     | EAVEWFKAHGHGRSSGSRDS--ECFVWDGLLVFLLIIA-VLMWLP---SSVILSL-----  |             |
| SDR42E1 | P. troglodytes | EAVEWFKAHGHGRSSGSRDS--ECFVWDGLLVFLLIIA-VLMWLP---SSVILSL-----  |             |
| SDR42E1 | M. musculus    | EVVEWFKAHGHGRGAAGQDS--EFMLWDGILILLALS-VLTWIL---PSTTLSI-----   |             |
| SDR42E1 | S. harrisii    | EVVDWFKAEHGRKFQNYTL--KHLIWNGLIFFLAIA-ILTWFS---NDHGDSS--LKD    |             |
| SDR42E1 | G. gallus      | EVVEWFRSQGCGPKPRKYTI--THLLRDGGLLLFIAV-LVSWFP---PAVIFSP-----   |             |
| SDR42E1 | P. bivittatus  | EVVEWFQAHGHGQKFSMSSG--KHFMRNAALAFVLVGM-VFLWFP---RFSWSFF-----  |             |
| SDR42E1 | X. tropicalis  | EVAEWFKNHGYGKQDKKFKR--NYFIWDIIFILLVAVV-LLSWHS---KLIGTSE-----  |             |
| SDR42E1 | L. oculatus    | DVVQWFKDKGHGRKPRSPSF--KQLLRDVFLMAMLVAV-IFSYP---VVGTF-----     |             |
| SDR42E2 | H. sapiens     | DAVELYVQSTTRRPRGSTARTLL-----RLLLRLLLFLGLLALALH-----FLGLQP     |             |
| SDR42E2 | P. troglodytes | DAVELYVQSTTRRPRGSTARTLL-----RLLLRLLLFLGLLALALH-----FLGLQP     |             |
| SDR42E2 | M. musculus    | DAVERYVQATTQPQRCIVLTLL-----RLLLMLLLLFALLGLALY-----FLGLQP      |             |
| SDR42E2 | S. harrisii    | DSVDHYIQTWHKQQRHSP--RFL-----RLLMVLICLLGTLTLLSLSLDPSFGLSLH     |             |
| SDR42E2 | G. gallus      | DSVEHYIKTRAEARSEHGFP-----RVMLLFLAILSLIFLSLRFDD-----LSV        |             |
| SDR42E2 | P. bivittatus  | DCVDHFLKKGPRSRNFFL-C-----KCLFLLVLLTGLIVLAVKFSQtSLccKGR        | 11p.2 12p.1 |
| SDR42E2 | X. tropicalis  | DSVDFYIKTRPQPLQPHYILMR-----KLFLLLLGFFSLFAFLYYSGS--ALSLAR      |             |
| SDR42E2 | L. oculatus    | EAVDGYLKTRASPRRLPACLRALLLGALALLLLSCAWGDLAAPRSLNS-----TRP      |             |
| SDR42E1 | X. tropicalis  | -----                                                         |             |
| SDR42E1 | L. oculatus    | -----                                                         |             |
| SDR42E1 | S. harrisii    | -LF-----                                                      |             |
| SDR42E1 | M. musculus    | -----                                                         |             |
| SDR42E1 | H. sapiens     | -----                                                         |             |
| SDR42E1 | P. troglodytes | -----                                                         |             |
| SDR42E1 | G. gallus      | -----                                                         |             |
| SDR42E1 | P. bivittatus  | -----                                                         |             |
| SDR42E2 | H. sapiens     | --LHAAVERL-----                                               |             |
| SDR42E2 | P. troglodytes | --LHAAVERL-----                                               |             |
| SDR42E2 | M. musculus    | --LQAVVERL-----                                               |             |
| SDR42E2 | S. harrisii    | --GNYM-----                                                   |             |
| SDR42E2 | G. gallus      | --LHFFKEAQH-----                                              |             |
| SDR42E2 | P. bivittatus  | ALPKRPRERAGSLQGPRREEKPGRSGLGETRSKGLRSAPDRQRGSPGGCYCTRRAPGGAA  |             |
| SDR42E2 | X. tropicalis  | -----                                                         |             |
| SDR42E2 | L. oculatus    | -----                                                         |             |
| SDR42E1 | H. sapiens     | -----                                                         |             |
| SDR42E1 | P. troglodytes | -----                                                         |             |
| SDR42E1 | M. musculus    | -----                                                         |             |
| SDR42E1 | S. harrisii    | -----                                                         |             |
| SDR42E1 | G. gallus      | -----                                                         |             |
| SDR42E1 | P. bivittatus  | -----                                                         |             |
| SDR42E1 | X. tropicalis  | -----                                                         |             |

```

SDR42E1 L. oculatus -----
SDR42E2 H. sapiens -----
SDR42E2 P. troglodytes -----
SDR42E2 M. musculus -----
SDR42E2 S. harrisii -----
SDR42E2 G. gallus -----
SDR42E2 P. bivittatus LQRFRLQLHRSFRKKSaFGGGALSWLQERLAALEMELHYGDPFI*FSEGQPEQGAKAKGSSG 13p.1
SDR42E2 X. tropicalis -----
SDR42E2 L. oculatus -----

```

Figure S24. Alignment of the vertebrate SDR42E family variants. For further details see Fig. S13.

\* symbol marks the position of identical amino acid residues of the aligned SDR protein sequences.

| Species               | Gene symbol  | Gene ID   | Chr | Enzyme symbol | Exons n. | Phases formula | % identity | aa n. | Structure consensus | Catalytic consensus |
|-----------------------|--------------|-----------|-----|---------------|----------|----------------|------------|-------|---------------------|---------------------|
| Homo sapiens          | RDH11        | 51109     | 14  | SDR7C1        | 7        | 122221         | 100.00     | 318   | GANTGIG             | YCHSK               |
| Gorilla gorilla       |              | 101134301 | 14  |               |          |                | 99.69      |       |                     |                     |
| Mus musculus          |              | 17252     | 12  |               |          |                | 85.08      | 316   |                     |                     |
| Monodelphis domestica |              | 100028370 | 1   |               |          |                | 77.71      | 316   |                     |                     |
| Poecilia formosa      |              | 103144764 | -   |               |          |                | 60.38      | 318   |                     | YCQSK               |
|                       |              |           |     |               |          |                |            |       |                     |                     |
| Homo sapiens          | RDH12        | 145226    | 14  | SDR7C2        | 7        | 122221         | 100.00     | 316   | GANTGIG             | YCHSK               |
| Pan troglodytes       |              | 100615509 | 14  |               |          |                | 100.00     |       |                     |                     |
| Mus musculus          |              | 77974     | 12  |               |          |                | 86.39      |       |                     |                     |
| Monodelphis domestica |              | 100028379 | 1   |               |          |                | 80.19      | 313   |                     |                     |
| Gallus gallus         |              | 423274    | 5   |               |          |                | 68.67      | 326   |                     |                     |
| Anolis carolinensis   | LOC100556987 | 100556987 | -   |               |          |                | 67.55      | 302   | GANSIG              | YCQSK               |
| Danio rerio           | RDH12        | 436597    | 13  | 62.62         |          |                |            |       |                     |                     |
|                       |              |           |     |               |          |                |            |       |                     |                     |
| Homo sapiens          | RDH13        | 112724    | 19  | SDR7C3        | 7        | 122222         | 100.00     | 331   | GANTGIG             | YCQSK               |
| Pan troglodytes       |              | 456293    | 19  |               |          |                | 99.70      |       |                     |                     |
| Mus musculus          | Rdh13        | 108841    | 7   |               |          |                | 84.29      | 334   |                     |                     |
| Xenopus tropicalis    | rdh13        | 496409,   | -   |               |          |                | 72.64      | 329   |                     |                     |
| Oryzias latipes       | LOC101164512 | 101164512 | 19  |               |          |                | 68.88      | 336   |                     |                     |
|                       |              |           |     |               |          |                |            |       |                     |                     |
| Homo sapiens          | RDH14        | 57665     | 2   |               |          |                | 100        | 336   |                     |                     |
| Pan troglodytes       |              | 470316    | 2A  |               |          |                | 100.00     |       |                     |                     |

|                          |              |           |    |         |    |           |        |     |         |       |
|--------------------------|--------------|-----------|----|---------|----|-----------|--------|-----|---------|-------|
| Mus musculus             | Rdh14        | 105014    | 12 | SDRC4   | 2  | 0         | 90.09  | 334 | GANSGLG | YSRSK |
| Monodelphis domestica    | RDH14        | 103093572 | -  |         |    |           | 78.85  | 338 |         | YSQSK |
| Pseudopodices humilis    |              | 102101217 | -  |         |    |           | 81.93  | 321 |         | YSRSK |
| Anolis carolinensis      | LOC100557468 | 100557468 | 1  |         |    |           | 79.09  | 330 | GANCGIG |       |
| Xenopus tropicalis       | rdh14        | 549985    | -  |         |    |           | 77.19  | 323 |         |       |
| Danio rerio              |              | 334665    | 20 |         |    |           | 67.18  |     |         |       |
|                          |              |           |    |         |    |           |        |     |         |       |
| Homo sapiens             | DHRS13       | 147015    | 17 | SDRC5   | 5  | 2022      | 100.00 | 377 | GANSGIG | YADTK |
| Pongo abelii             |              | 100452796 | 17 |         |    |           | 98.67  |     |         | YADSK |
| Mus musculus             | Dhrs13       | 70451     | 11 |         |    |           | 84.76  | 375 |         |       |
| Monodelphis domestica    | DHRS13       | 100025100 | 2  |         |    |           | 73.64  | 349 | GGNTGIG | YCDSK |
| Haliaeetus leucocephalus |              | 104835594 | -  |         |    |           | 59.15  | 328 | GGSSGIG |       |
| Gekko japonicus          |              | 107119410 | -  |         |    |           | 58.33  | 313 | GGNTGIG | YCNSK |
| Xenopus tropicalis       | dhrs13       | 394935    | -  |         |    |           | 57.32  | 314 | GANVGIG | YCDSK |
| Oryzias latipes          | LOC101160574 | 101160574 | 13 |         |    |           | 49.84  | 318 | GSNTGIG |       |
|                          |              |           |    |         |    |           |        |     |         |       |
| Homo sapiens             | DHRS12       | 79758     | 13 | SDR40C1 | 10 | 120020022 | 100%   | 317 | GGNSGIG | YAQNK |
| Pan troglodytes          |              | 743256    | 13 |         |    |           | 96.53  |     |         |       |
| Bos taurus               |              | 507276    | 12 |         |    |           | 85.49  |     |         |       |
| Gallus gallus            |              | 770438    | 1  |         |    |           | 71.61  | 327 | GSNSGIG |       |
| Anolis carolinensis      | dhrs12       | 10056528  | 1  |         |    |           | 70.66  | 319 | GANSGIG |       |
| Xenopus tropicalis       |              | 780002    | -  |         |    |           | 67.82  | 323 |         |       |
| Oryzias latipes          | LOC101155475 | 101155475 | 21 |         |    |           | 66.25  | 318 |         |       |



Table S15. Genetic and molecular data of the vertebrate SDR7C family and of the SDR40C variants. Chr, chromosome; Phases formula contains the phase types symbols aligned according to the sequence of their relative splicing sites; conserved amino acids of the consensus sequences are in red; aa n., number of the variant amino acids.

| Species                           | Gene symbol  | Gene ID   | Chr  | Enzyme symbol | Exons n. | Phases formula | % identity | aa n. | Structure consensus | Catalysis consensus |
|-----------------------------------|--------------|-----------|------|---------------|----------|----------------|------------|-------|---------------------|---------------------|
| <i>Homo sapiens</i>               | BDH1         | 622       | 3    | SDR9C1        | 6        | 10022          | 100.00     | 343   | GCDSGFG             | YCITK               |
| <i>Pan paniscus</i>               |              | 100967469 | 3    |               |          |                | 99.42      |       |                     |                     |
| <i>Mus musculus</i>               | Bdh1         | 71911     | 16B2 |               |          |                | 85.71      |       |                     |                     |
| <i>Monodelphis domestica</i>      | BDH1         | 100032119 | -    |               |          |                | 69.71      | 340   |                     |                     |
| <i>Columba livia</i>              |              | 102092067 | -    |               |          |                | 72.59      | 343   |                     |                     |
| <i>Chrysemys picta</i>            |              | 101941677 | -    |               |          |                | 71.72      | 344   |                     |                     |
| <i>Xenopus tropicalis</i>         | bdh1         | 100495647 | -    |               |          |                | 74.85      | 330   |                     |                     |
| <i>Danio rerio</i>                |              | 100037356 | 24   |               |          |                | 54.71      | 359   | GCDTGFG             | YCISK               |
|                                   |              |           |      |               |          |                |            |       |                     |                     |
| <i>Homo sapiens</i>               | HSD17B2      | 3294      | 16   | SDR9C2        | 5        | 2222           | 100.00     | 387   | GGDCGLG             | YGSSK               |
| <i>Pan troglodytes</i>            |              | 454269    | 16   |               |          |                | 99.48      |       |                     |                     |
| <i>Mus musculus</i>               | Hsd17b2      | 15486     | 8    |               |          |                | 59.37      | 381   | GADSGFG             | YAATK               |
| <i>Monodelphis domestica</i>      | LOC100031815 | 100031815 | 1    |               |          |                | 52.28      | 383   | GGDSGIG             | YCASK               |
| <i>Gallus gallus</i>              | HSD17B2      | 415807    | 11   |               |          |                | 53.40      | 384   | GSDTGIG             | YGASK               |
| <i>Alligator mississippiensis</i> | HSD17B2      | 102574309 | -    |               |          |                | 61.61      | 310   | GSDSGIG             |                     |
| <i>Xenopus tropicalis</i>         | hsd11b2      | 100497002 | -    |               |          |                | 45.92      | 381   | GCDSGFG             | YASSK               |
| <i>Danio rerio</i>                |              | 449537    | 25   |               |          |                | 38.97      | 358   | SCDSGFG             | YGASK               |
|                                   |              |           |      |               |          |                |            |       |                     |                     |
| <i>Homo sapiens</i>               | HSD11B2      | 3291      | 16   |               |          |                | 100.00     | 405   | GCDSGFG             | YGTSK               |
| <i>Pan troglodytes</i>            |              | 468001    | 16   |               |          |                | 99.75      |       |                     |                     |
| <i>Mus musculus</i>               | Hsd11b2      | 15484     | 8    |               |          |                | 86.53      | 385   | GCDTGFG             |                     |

|                              |         |           |    |        |   |      |        |         |         |       |
|------------------------------|---------|-----------|----|--------|---|------|--------|---------|---------|-------|
| <i>Gallus gallus</i>         | HSD11B2 | 100858361 | 11 | SDR9C3 | 5 | 2222 | 58.49  | 388     | GCDSGFG | YGASK |
| <i>Chrysemys picta</i>       | HSD11B2 | 101949646 | -  |        |   |      | 59.79  | 383     | GCDSGFG |       |
| <i>Xenopus tropicalis</i>    | hsd11b2 | 100489854 | -  |        |   |      | 45.95  | 368     |         | YGASK |
| <i>Danio rerio</i>           |         | 334098    | 7  |        |   |      | 42.47  | 414     |         |       |
|                              |         |           |    |        |   |      |        |         |         |       |
| <i>Homo sapiens</i>          | DHRS9   | 10170     | 2  | SDR9C4 | 4 | 212  | 100.00 | 319     | GCDSGFG | YTPSK |
| <i>Pan troglodytes</i>       |         | 470578    | 2B |        |   |      | 99.37  |         | GCDTGFG |       |
| <i>Mus musculus</i>          | Dhrs9   | 241452    | 2  |        |   |      | 85.89  |         |         |       |
| <i>Monodelphis domestica</i> | DHRS9   | 100017287 | 4  |        |   |      | 77.43  | 321     |         |       |
| <i>Gallus gallus</i>         |         | 424169    | 7  |        |   |      | 59.75  |         | GCDSGFG | YCPSK |
| <i>Chelonia mydas</i>        |         | 102934689 | -  |        |   |      | 65.20  |         |         | 322   |
| <i>Xenopus tropicalis</i>    | dhrs9   | 407852    | -  |        |   |      | 57.55  | GCDTGFG | YFSSK   |       |
| <i>Danio rerio</i>           |         | 322529    | 9  |        |   |      | 45.74  |         | 319     | YCITK |
|                              |         |           |    |        |   |      |        |         |         |       |
| <i>Homo sapiens</i>          | RDH5    | 5959      | 12 | SDR9C5 | 4 | 212  | 100.00 | 318     | GCDSGFG | YCVSK |
| <i>Pan troglodytes</i>       |         | 467029    | 12 |        |   |      | 99.37  |         |         |       |
| <i>Mus musculus</i>          | Rdh5    | 19682     | 10 |        |   |      | 87.11  |         |         |       |
| <i>Sarcophilus harrisii</i>  | RDH5    | 100926680 | -  |        |   |      | 76.73  |         |         |       |
| <i>Gallus gallus</i>         |         | 395452    | 33 |        |   |      | 66.04  | 319     |         |       |
| <i>Anolis carolinensis</i>   | rdh5    | 100561257 | -  |        |   |      | 61.32  |         | GCDTGFG | YCISK |
| <i>Xenopus tropicalis</i>    | RDH5    | 496830    | -  |        |   |      | 58.49  |         |         | YCVSK |
| <i>Danio rerio</i>           |         | 556528    | 22 |        |   | 1212 | 53.31  | 328     | GCDSGFG | YCISK |
|                              |         |           |    |        |   |      |        |         |         |       |
| <i>Homo sapiens</i>          | HSD17B6 | 8630      | 12 |        |   |      | 100.00 | 317     |         | YCVSK |
| <i>Pan paniscus</i>          |         | 100996145 | 12 |        |   |      | 99.05  |         |         |       |
| <i>Mus</i>                   |         |           |    |        |   |      |        |         |         |       |

|                              |              |           |    |        |   |     |        |     |         |       |       |
|------------------------------|--------------|-----------|----|--------|---|-----|--------|-----|---------|-------|-------|
| <i>musculus</i>              | Hsd17b6      | 27400     | 10 | SDR9C6 | 4 | 212 | 73.19  | 318 | GCDSGFG | YSCSK |       |
| <i>Sarcophilus harrisii</i>  | LOC100931687 | 100931687 | 5  |        |   |     | 65.30  |     |         | YCSSK |       |
| <i>Anolis carolinensis</i>   | hsd17b6      | 100564174 | 2  |        |   |     | 64.04  |     |         | YCPSK |       |
| <i>Xenopus tropicalis</i>    |              | 496749,   | -  |        |   |     | 54.29  |     |         | YCLSK |       |
|                              |              |           |    |        |   |     |        |     |         |       |       |
| <i>Homo sapiens</i>          | SDR9C7       | 121214    | 12 | SDR9C7 | 4 | 212 | 100.00 | 313 | GCDSGFG | YCVSK |       |
| <i>Pan troglodytes</i>       |              | 467039    | 12 |        |   |     | 99.36  |     |         |       |       |
| <i>Mus musculus</i>          | Sdr9c7       | 70061     | 10 |        |   |     | 84.66  |     |         |       |       |
| <i>Sarcophilus harrisii</i>  | SDR9C7       | 100929345 | -  |        |   |     | 78.91  | 314 |         |       |       |
| <i>Xenopus tropicalis</i>    | LOC100170425 | 100170425 | -  |        |   |     | 48.88  | 319 |         | YSISK |       |
|                              |              |           |    |        |   |     |        |     |         |       |       |
| <i>Homo sapiens</i>          | RDH16        | 8608      | 12 | SDR9C8 | 4 | 212 | 100.00 | 317 | GCDSGFG | YCISK |       |
| <i>Pan troglodytes</i>       |              | 467206    | 12 |        |   |     | 99.05  |     |         |       |       |
| <i>Mus musculus</i>          | Rdh16        | 19683     | 10 |        |   |     | 73.19  |     |         |       |       |
| <i>Monodelphis domestica</i> | RDH16        | 100011050 | -  |        |   |     | 67.82  | 318 |         |       |       |
| <i>Pseudopodices humilis</i> | LOC102113964 | 102100504 | -  |        |   |     | 64.67  |     |         |       |       |
| <i>Anolis carolinensis</i>   | LOC100567570 | 100567570 | 2  |        |   |     | 67.51  | 317 |         | YCPSK |       |
| <i>Xenopus tropicalis</i>    | RDH16        | 100135184 | -  |        |   |     | 57.91  |     |         | YSISK |       |
| <i>Poecilia reticulata</i>   | LOC103461718 | 103461718 | -  |        |   |     |        |     |         |       | 51.10 |

Table S16. Genetic and molecular data of the vertebrate SDR9C family variants. The atypical amino acid of *Danio rerio* SDR9C2 structure consensus is highlighted in turquoise. For further details see Table S15.

| Species                      | Gene symbol | Gene ID   | Chr | Enzyme symbol | Exons n. | Phases formula | % Identity | aa n. | Structure consensus | Catalysis consensus |
|------------------------------|-------------|-----------|-----|---------------|----------|----------------|------------|-------|---------------------|---------------------|
| <i>Homo sapiens</i>          | FAR1        | 84188     | 11  | SDR10E1       | 11       | 0110012101     | 100        | 515   | GATGFLG             | YIYTK               |
| <i>Pan troglodytes</i>       |             | 451036    | 11  |               |          |                | 99.81      |       |                     |                     |
| <i>Mus musculus</i>          | Far1        | 67420     | 7   |               |          |                | 98.06      |       |                     |                     |
| <i>Sarcophilus harrisii</i>  | FAR1        | 100920845 | -   |               |          |                | 97.48      |       |                     |                     |
| <i>Gallus gallus</i>         |             | 423028    | 5   |               |          |                | 89.71      |       |                     |                     |
| <i>Chelonia mydas</i>        |             | 102930779 | -   |               |          |                | 89.71      |       |                     |                     |
| <i>Xenopus tropicalis</i>    | far1        | 100038270 | -   |               |          |                | 85.63      | 518   | GATGFMG             | YTYTK               |
| <i>Danio rerio</i>           |             | 406829    | 25  |               |          |                | 78.06      |       |                     |                     |
|                              |             |           |     |               |          |                |            |       |                     |                     |
| <i>Homo sapiens</i>          | FAR2        | 55711     | 12  | SDR10E2       | 11       | 0110012101     | 100        | 515   | GATGFLG             | YTYTK               |
| <i>Pan troglodytes</i>       |             | 473394    | 12  |               |          |                | 99.61      |       |                     |                     |
| <i>Mus musculus</i>          | Far2        | 330450    | 6   |               |          |                | 87.96      |       |                     |                     |
| <i>Monodelphis domestica</i> | FAR2        | 100013219 | 8   |               |          |                | 78.83      |       |                     |                     |
| <i>Gallus gallus</i>         |             | 419043    | 1   |               |          |                | 63.50      |       |                     |                     |
| <i>Anolis carolinensis</i>   | far2        | 100565436 | 5   |               |          |                | 62.14      | YTYTK |                     |                     |
| <i>Esox lucius</i>           |             | 105023414 | -   |               |          |                | 62.14      |       | YTYTK               |                     |

Table S17. Genetic and molecular data of the vertebrate SDR10E family variants. For further details see Table S15.

| Species                       | Gene symbol  | Gene ID   | Chr | Enzyme symbol | Exons n. | Phases formula | % identity | aa n. | Structure consensus | Catalysis consensus |       |
|-------------------------------|--------------|-----------|-----|---------------|----------|----------------|------------|-------|---------------------|---------------------|-------|
| <i>Homo sapiens</i>           | HSD3B1       | 3283      | 1   | SDR11E1       | 3        | 22             | 100.00     | 375   | GAGGFLG             | YPHSK               |       |
| <i>Pan troglodytes</i>        |              | 469446    | 1   |               |          |                | 99.20      |       |                     |                     |       |
| <i>Mus Musculus</i>           | Hsd3B1       | 15492     | 3   |               |          |                | 71.58      | 373   | GAGGFVG             | YPYSK               |       |
| <i>Monodelphis domestica</i>  | LOC100012668 | 100012668 | 2   |               |          |                | 62.93      | 377   | GAGGFLG             |                     | YAQSK |
| <i>Nipponia nippon</i>        | LOC104008615 | 104008615 | -   |               |          |                | 55.73      |       |                     |                     |       |
| <i>Thamnophis sirtalis</i>    | LOC106542700 | 106542700 | -   |               |          |                | 50.67      |       |                     | YAETK               |       |
| <i>Larimichthys crocea</i>    | hsd3B1       | 104921488 | -   |               |          |                |            |       |                     | 46.65               | 374   |
| <i>Homo sapiens</i>           | HSD3B2       | 3284      | 1   | SDR11E2       | 3        | 22             | 100        | 372   | GAGGLLG             | YPYSK               |       |
| <i>Pan troglodytes</i>        | LOC457165    | 457165    | 1   |               |          |                | 98.92      |       |                     |                     |       |
| <i>Mus musculus</i>           | Hsd3b2       | 15493     | 3   |               |          |                | 70.70      | 373   | GAGGFLG             |                     | YAQSK |
| <i>Sarcophilus harrisii</i>   | HSD3B2       | 100913530 | -   |               |          |                | 61.83      | 377   |                     | YAETK               |       |
| <i>Gallus Gallus</i>          |              | 396015    | 1   |               |          |                | 55.91      |       |                     |                     |       |
| <i>Gekko japonicus</i>        | LOC107114856 | 107114856 | -   |               |          |                | 49.73      |       |                     |                     |       |
| <i>Danio rerio</i>            | hsd3b2       | 373131    | 20  |               |          |                | 44.50      | 374   | GACGFLG             | YSKTK               |       |
| <i>Homo sapiens</i>           | HSD3B7       | 80270     | 16  | SDR11E3       | 6        | 22102          | 100        | 369   | GGCGFLG             | YPCSK               |       |
| <i>Pan troglodytes</i>        |              | 454059    | 16  |               |          |                | 98.92      |       |                     |                     |       |
| <i>Mus musculus</i>           | Hsd3b7       | 101502    | 7   |               |          |                | 86.99      |       |                     |                     |       |
| <i>Sarcophilus harrisii</i>   | HSD3B7       | 100929800 | -   |               |          |                | 73.02      | 370   | GGCGFVG             | YPRSK               |       |
| <i>Zonotrichia albicollis</i> |              | 102073947 | -   |               |          |                | 43.37      | 371   |                     | YGKTK               |       |
| <i>Anolis carolinensis</i>    | hsd3b7       | 100555869 | -   |               |          |                | 65.01      | 366   | GGCGFLG             | YPVSK               |       |
| <i>Xenopus tropicalis</i>     |              | 100145626 | -   |               |          |                | 60.38      | 380   |                     | YPLSK               |       |
| <i>Danio rerio</i>            |              | 327462    | 3   |               |          |                | 54.12      | 368   |                     | YPKSK               |       |

Table S18. Genetic and molecular data of the vertebrate SDR11E family variants. For further details see Table S15.

| Species                       | Gene symbol | Gene ID   | Chr | Enzyme symbol | Exons n. | Phases formula | % identity | aa n. | Structure consensus | Catalysis consensus |         |
|-------------------------------|-------------|-----------|-----|---------------|----------|----------------|------------|-------|---------------------|---------------------|---------|
| <i>Homo sapiens</i>           | HSD17B12    | 51144     | 11  | SDR12C1       | 11       | 2022001000     | 100        | 312   | GSTDGIG             | YSATK               |         |
| <i>Pan troglodytes</i>        |             | 741010    | 11  |               |          |                | 99.68      |       |                     |                     |         |
| <i>Mus musculus</i>           | Hsd17b12    | 56348     | 2   |               |          |                | 81.09      |       | GGTDGIG             |                     |         |
| <i>Monodelphis domestica</i>  | HSD17B12    | 100013277 | 5   |               |          |                | 77.27      | 309   | GSTDGIG             |                     | GATDGIG |
| <i>Zonotrichia albicollis</i> |             | 102062927 | -   |               |          |                | 67.31      | 316   |                     |                     |         |
| <i>Anolis carolinensis</i>    | hsd17b12    | 100557660 | 1   |               |          |                | 57.05      | 317   |                     |                     |         |
| <i>Xenopus tropicalis</i>     |             | 549988    | -   |               |          |                | 60.90      | 320   |                     |                     |         |
| <i>Poecilia latipinna</i>     |             | 106964816 | -   |               |          |                | 60.58      |       |                     |                     |         |
| <i>Homo sapiens</i>           | HSD17B3     | 3293      | 9   | SDR12C2       | 11       | 2022001000     | 100        | 310   | GAGDGIG             | YSASK               |         |
| <i>Pan troglodytes</i>        |             | 742116    | 9   |               |          |                | 98.71      |       |                     |                     |         |
| <i>Mus musculus</i>           | Hsd17b3     | 15487     | 13  |               |          |                | 73.11      |       | 305                 | YSSTK               |         |
| <i>Sarcophilus harrisii</i>   | HSD17B3     | 100935109 | 2   |               |          |                | 69.68      | 310   | GAGDGLG             |                     | YSASK   |
| <i>Gallus gallus</i>          |             | 427474    | Z   |               |          |                | 59.35      |       |                     |                     |         |
| <i>Anolis carolinensis</i>    | hsd17b3     | 100561157 | 2   |               |          |                | 55.20      | 264   | GAGDGIG             | YSASK               |         |
| <i>Xenopus tropicalis</i>     |             | 101730254 | -   |               |          |                | 57.28      | 302   |                     |                     |         |
| <i>Danio rerio</i>            |             | 393335    | 8   |               |          |                | 45.07      | 307   | GGSDGIG             | YAASK               |         |
| <i>Homo sapiens</i>           | HSDL1       | 83693     | 16  |               |          |                | 100        | 330   | GATDGIG             | ESASK               |         |
| <i>Pan troglodytes</i>        |             | 741546    | 16  |               |          |                | 99.39      |       |                     |                     |         |
| <i>Mus musculus</i>           | Hsd11       | 72552     | 8   |               |          |                | 87.88      |       |                     |                     |         |
| <i>Sarcophilus harrisii</i>   |             | 100918948 | -   |               |          |                | 86.06      |       |                     | YSASK               |         |

|                             |       |           |     |         |   |     |       |     |         |       |
|-----------------------------|-------|-----------|-----|---------|---|-----|-------|-----|---------|-------|
| <i>Gallus gallus</i>        | HSDL1 | 415703    | 11  | SDR12C3 | 4 | 100 | 65.15 | 331 | GSTDGIG | YGASK |
| <i>Gekko japonicus</i>      |       | 107106023 | -   |         |   |     | 65.76 |     | GGTSGIG | YSASK |
| <i>Xenopus tropicalis</i>   | hsdl1 | 100489686 | -   |         |   |     | 50.00 | 322 | GATSGIA | YTPCQ |
| <i>Lepisosteus oculatus</i> |       | 102682551 | LG1 |         |   |     | 69.84 | 319 | GASDGLG | YSASK |

Table S19. Genetic and molecular data of the vertebrate SDR12C family variants. The atypical amino acids of the structure and catalytic consensus are highlighted in turquoise. For further details see Table S15 and Consensus in Online Resources 1.

| Species                           | Gene symbol | Gene ID   | Chr | Enzyme symbol | Exons n. | Phases formula | % identity | aa n. | Structure consensus | Catalysis consensus |
|-----------------------------------|-------------|-----------|-----|---------------|----------|----------------|------------|-------|---------------------|---------------------|
| <i>Homo sapiens</i>               | DRSH3       | 9249      | 1   | SDR16C1       | 6        | 00011          | 100        | 302   | GGGRGIG             | YCTSK               |
| <i>Pan troglodytes</i>            |             | 737006    | 1   |               |          |                |            |       |                     |                     |
| <i>Mus musculus</i>               | dhrs3       | 20148     | 4   |               |          |                | 95.03      |       |                     |                     |
| <i>Gallus gallus</i>              | DHRS3       | 419480    | 21  |               |          |                | 90.07      |       |                     |                     |
| <i>Gekko japonicus</i>            |             | 107124081 | -   |               |          |                | 87.75      |       |                     |                     |
| <i>Xenopus tropicalis</i>         | dhrs3       | 493258    | -   |               |          |                | 83.77      |       |                     |                     |
| <i>Danio rerio</i>                | dhrs3a      | 445083    | 23  |               |          |                | 77.15      |       |                     |                     |
| <i>Homo sapiens</i>               | HSD17B11    | 51170     | 4   | SDR16C2       | 7        | 000111         | 100        | 300   | GAGHGIG             | YCSSK               |
| <i>Pan troglodytes</i>            |             | 461364    | 4   |               |          |                | 100        |       |                     |                     |
| <i>Mus musculus</i>               | Hsd17b11    | 14664     | 5   |               |          |                | 83.22      | 298   |                     |                     |
| <i>Sarcophilus harrisii</i>       | HSD17B11    | 100917981 | 6   |               |          |                | 78.00      | 300   |                     |                     |
| <i>Gallus gallus</i>              | LOC428754   | 42875     | 4   |               |          |                | 61.87      | 299   | GAARGLG             |                     |
| <i>Alligator mississippiensis</i> | HSD17B11    | 102560079 | -   |               |          |                | 63.88      |       | GAGHGLG             |                     |
| <i>Xenopus tropicalis</i>         | hsd17b11    | 496757    | -   |               |          |                | 59.67      | 300   | GAGHGIG             | YCSTK               |
| <i>Homo sapiens</i>               | HSD17B13    | 345275    | 4   |               |          |                | 100        |       |                     |                     |
| <i>Pan troglodytes</i>            |             | 471245    | 4   |               |          |                | 98.33      |       |                     |                     |

|                       |              |           |   |         |         |        |        |     |         |         |
|-----------------------|--------------|-----------|---|---------|---------|--------|--------|-----|---------|---------|
| Mus musculus          | Hsd17b13     | 243168    | 5 | SDR16C3 | 7       | 000111 | 81.33  | 300 | GAGHGIG | YCSSK   |
| Sarcophilus harrisii  | HSD17B13     | 100918501 | 6 |         |         |        | 79.33  |     |         |         |
| Ficedula albicollis   | LOC101813950 | 101813950 | 4 |         |         |        | 62.88  | 299 | GAGHGVG |         |
| Anolis carolinensis   | LOC100561108 | 100561108 | 5 |         |         |        | 59.29  | 280 | GAGHGLG | YTSSK   |
| Xenopus tropicalis    | hsd17b13     | 496682    | - |         |         |        | 61.33  | 300 | GSGHGIG | YCASK   |
| Homo sapiens          | RDH10        | 157506    | 8 | SDR16C4 | 6       | 20011  | 100    | 341 | GAGSGLG | YCASK   |
| Pan troglodytes       |              | 472795    | 8 |         |         |        | 100    |     |         |         |
| Mus musculus          | Rdh10        | 98711     | 1 |         |         |        | 98.83  | 340 |         |         |
| Monodelphis domestica | RDH10        | 100020635 | 3 |         |         |        | 98.83  | 341 |         |         |
| Gallus gallus         |              | 420183    | 2 |         |         |        | 92.92  | 339 |         |         |
| Gekko japonicus       |              | 107114646 | - |         |         |        | 91.50  | 342 |         |         |
| Xenopus tropicalis    | rdh10        | 496504    | - |         |         |        | 88.86  | 341 |         |         |
| Poecilia latipinna    |              | 106955667 | - |         |         |        | 80.53  | 340 |         |         |
| Homo sapiens          | SDR16C5      | 195814    | 8 | SDR16C5 | 6       | 00211  | 100    | 309 | GAGSGLG | YCASK   |
| Pan troglodytes       |              | 472773    | 8 |         |         |        | 99.68  |     |         |         |
| Mus musculus          | Sdr16c5      | 242285    | 4 |         |         |        | 79.94% |     |         |         |
| Monodelphis domestica | LOC100029976 | 100029976 | 3 |         |         |        | 67.64  | 305 | GAGSGIG |         |
| Gallus gallus         | SDR16C5      | 421130    | 2 |         |         |        | 60.33  |     |         |         |
| Python bivittatus     |              | 103063029 | - |         |         |        | 57.24  | 306 |         | YCTSK   |
| Xenopus tropicalis    | sdr16c5      | 448386    | - |         |         |        | 63.28  | 305 | YCASK   |         |
| Danio rerio           | sdr16c5a     | 405814    | 2 |         |         |        | 56.39  | 306 |         | GSGSGIG |
|                       | sdr16c5b     | 406799    | 7 | 60.66   | GAGSGIG |        |        |     |         |         |

Table S20. Genetic and molecular data of the vertebrate SDR16C family variants. For further details see Table S15.



| Species                      | Gene symbol  | Gene ID   | Chr | Enzyme symbol | Exons n. | Phases formula | % identity | aa n.   | Structure consensus | Catalysis consensus |
|------------------------------|--------------|-----------|-----|---------------|----------|----------------|------------|---------|---------------------|---------------------|
| <i>Homo sapiens</i>          | CBR1         | 873       | 21  | SDR21C1       | 3        | 22             | 100.00     | 277     | GGNKGIG             | YGVTK               |
| <i>Pan troglodytes</i>       |              | 473983    | 21  |               |          |                | 100.00     |         |                     |                     |
| <i>Mus musculus</i>          | Cbr1         | 12408     | 16  |               |          |                | 87.73      |         | GANKGIG             |                     |
| <i>Monodelphis domestica</i> | LOC100015233 | 100015233 | 4   |               |          |                | 84.12      | GSNKGIG | YGVSK               |                     |
| <i>Gallus gallus</i>         | CBR1         | 418512    | 1   |               |          |                | 78.26      |         |                     |                     |
| <i>Chrysemys picta</i>       |              | 101937374 | -   |               |          |                | 78.26      | GGNKGIG | YGVTK               |                     |
| <i>Xenopus tropicalis</i>    | cbr1         | 496612    | 2   |               |          |                | 72.83      |         |                     | 277                 |
| <i>Danio rerio</i>           |              | 373866    | 1   |               |          |                | 65.94      | 276     | GANKGIG             | YGISK               |
| <i>Homo sapiens</i>          | CBR3         | 874       | 21  | SDR21C2       | 3        | 22             | 100.00     | 277     | GANRGIG             | YGVSK               |
| <i>Pan troglodytes</i>       |              | 458533    | 21  |               |          |                | 99.64      |         |                     |                     |
| <i>Mus musculus</i>          | Cbr3         | 109857    | 16  |               |          |                | 85.20      |         | GANKGIG             |                     |
| <i>Monodelphis domestica</i> | LOC100015187 | 100015187 | 4   |               |          |                | 66.43      |         | GSNKGIG             | YGVTK               |
| <i>Xenopus tropicalis</i>    | cbr3         | 100145008 | 2   |               |          |                | 61.96      |         | GGNKGIG             | YGVSK               |

Table S21. Genetic and molecular data of the vertebrate SDR21C family variants. For further details see Table S15.

| Species                      | Gene symbol | Gene ID   | Chr | Enzyme symbol | Exons n. | Phases formula | % identity | aa n. | Structure consensus | Catalysis consensus |
|------------------------------|-------------|-----------|-----|---------------|----------|----------------|------------|-------|---------------------|---------------------|
| <i>Homo sapiens</i>          | DHRS2       | 10202     | 14  | SDR25C1       | 8        | 1001001        | 100.00     | 280   | GSTSGIG             | YNVSK               |
| <i>Pan paniscus</i>          |             | 100976049 | 14  |               |          |                | 96.79      |       |                     |                     |
| <i>Mus musculus</i>          | Dhrs2       | 71412     | 14  |               |          |                | 65.47      | 282   | GSTRGIG             | YNTSK               |
| <i>Monodelphis domestica</i> | DHRS2       | 100030637 | 1   |               |          |                | 67.50      | 281   | GSTQGIG             | YNISK               |

|                              |              |           |    |         |   |          |        |     |          |       |
|------------------------------|--------------|-----------|----|---------|---|----------|--------|-----|----------|-------|
| <i>Homo sapiens</i>          | DHRS4        | 10901     | 14 | SDR25C2 | 8 | 1001001  | 100.00 | 278 | ASTDGIG  | YNVSK |
| <i>Pan troglodytes</i>       |              | 452804    | 14 |         |   |          | 98.20  |     |          |       |
| <i>Mus musculus</i>          |              | 28200     | 14 |         |   |          | 79.14  |     |          |       |
| <i>Monodelphis domestica</i> | DHRS4        | 100030652 | 1  |         | 9 | 21001001 | 69.42  | 326 | ASTEIGIG | YSVSK |
| <i>Gallus gallus</i>         |              | 426247    | -  |         | 8 | 1001001  | 54.89  | 273 | AATDGIG  |       |
| <i>Anolis carolinensis</i>   | LOC100553479 | 100553479 | -  |         |   |          | 67.41  | 282 | ASTEIGIG | YNVSK |
| <i>Xenopus tropicalis</i>    | dhers4       | 548501    | -  |         |   |          | 66.28  | 261 | ASTDGIG  | YSVSK |
| <i>Danio rerio</i>           | dhers4       | 393539    | 7  |         |   |          | 58.39  | 276 |          |       |

Table S22. Genetic and molecular data of the vertebrate SDR25C family variants. Alanine (A), diagnostic of the vertebrate SDR25C2 structure consensus, is highlighted in turquoise. For further details see Table S15 and Consensuses in Online resources 1.

| Species                           | Gene symbol | Gene ID   | Chr | Enzyme symbol | Exons n. | Phases formula | % identity | aa n. | Structure consensus | Catalysis consensus |
|-----------------------------------|-------------|-----------|-----|---------------|----------|----------------|------------|-------|---------------------|---------------------|
| <i>Homo sapiens</i>               | HSD11B1     | 3290      | 1   | SDR26C1       | 6        | 20222          | 100.00     | 292   | GASKGIG             | YSASK               |
| <i>Pan troglodytes</i>            |             | 457698    | 1   |               |          |                | 99.66      |       |                     |                     |
| <i>Mus musculus</i>               | Hsd11b1     | 15483     | 1   |               |          |                | 78.42      |       |                     |                     |
| <i>Sarcophilus harrisii</i>       | HSD11B1     | 100923255 | 4   |               |          |                | 60.69      | 312   | GASTGIG             | YSATK               |
| <i>Gallus gallus</i>              | HSD11B1     | 771930    | 26  |               |          |                | 57.53      | 293   |                     |                     |
| <i>Anolis carolinensis</i>        | hsd11b1     | 100555338 | 4   |               |          |                | 59.93      | 291   | GASTGIG             | YCASK               |
| <i>Xenopus tropicalis</i>         | hsd11b11.2  | 100038278 | -   |               |          |                | 42.51      |       | GSSTGIG             |                     |
| <i>Homo sapiens</i>               | HSD11B1L    | 374875    | 19  | SDR26C2       | 7        | 202021         | 100.00     | 315   | GANAGVG             | YSAAK               |
| <i>Pongo abelii</i>               |             | 100460111 | 19  |               |          |                | 82.86      | 287   |                     |                     |
| <i>Ictidomys tridecemlineatus</i> | Hsd11b11    | 101978515 | -   |               |          |                | 75.27      | 288   | GAAGDAGVG           | YSATK               |
| <i>Nipponia nippon</i>            | HSD11B1L    | 104016278 | -   |               |          |                | 52.11      | 288   | GASAGIG             |                     |
| <i>Anolis carolinensis</i>        | hsd11b11    | 100565341 | -   |               |          |                | 51.30      | 290   | GASDGIG             |                     |
| <i>Xenopus tropicalis</i>         |             | 100037875 | -   |               |          |                | 45.45      | 286   | GASTGIG             | YAASK               |

|                                 |              |           |   |  |  |  |       |     |         |       |
|---------------------------------|--------------|-----------|---|--|--|--|-------|-----|---------|-------|
| <i>Sinocyclocheilus grahami</i> | LOC107596225 | 107596225 | - |  |  |  | 43.43 | 285 | GASSGIG | YTSTK |
|---------------------------------|--------------|-----------|---|--|--|--|-------|-----|---------|-------|

Table S23. Genetic and molecular data of the vertebrate SDR21C family variants. The atypical structure consensus of *Ictidomys tridecemlineatus* is highlighted in turquoise. For further details see Table S15.

| Species                      | Gene symbol  | Gene ID   | Chr | Enzyme symbol | Exons n. | Phases formula | % identity | aa n. | Structure consensus | Catalysis consensus |
|------------------------------|--------------|-----------|-----|---------------|----------|----------------|------------|-------|---------------------|---------------------|
| <i>Homo sapiens</i>          | HSD17B1      | 3292      | 17  | SDR28C1       | 6        | 22210          | 100        | 328   | GCSSGIG             | YCASK               |
| <i>Pongo abelii</i>          |              | 100456666 | 17  |               |          |                | 96.30      | 324   |                     |                     |
| <i>Mus musculus</i>          | Hsd17b1      | 15485     | 11  |               |          |                | 68.83      | 344   |                     |                     |
| <i>Monodelphis domestica</i> | HSD17B1      | 100011776 | 2   |               |          |                | 71.15      | 305   |                     |                     |
| <i>Gallus gallus</i>         |              | 395641    | 27  |               |          |                | 53.92      | 302   |                     |                     |
| <i>Xenopus tropicalis</i>    | hsd17b1      | 100489679 | -   |               |          |                | 53.24      | 295   |                     |                     |
| <i>Danio rerio</i>           |              | 402842    | 3   |               |          |                | 51.03      |       |                     |                     |
| <i>Homo sapiens</i>          | RDH8         | 50700     | 19  | SDR28C2       | 6        | 22210          | 100        | 331   | GCSSGIG             | YAASK               |
| <i>Pan paniscus</i>          |              | 100984041 | 19  |               |          |                | 98.71      | 311   |                     |                     |
| <i>Mus musculus</i>          | Rdh8         | 235033    | 9   |               |          |                | 82.96      | 317   |                     |                     |
| <i>Monodelphis domestica</i> | RDH8         | 100013649 | 3   |               |          |                | 68.14      | 321   |                     | YSASK               |
| <i>Gallus gallus</i>         | LOC100858293 | 100858293 | 27  |               |          |                | 56.63      | 318   |                     | YAAAK               |
| <i>Anolis carolinensis</i>   | rdh8         | 100560987 | -   |               |          |                | 61.86      | 316   |                     | YAASK               |
| <i>Xenopus tropicalis</i>    | LOC100491569 | 100491569 | -   |               |          |                | 51.06      | 358   |                     |                     |
| <i>Ictalurus punctatus</i>   | rdh8         | 108257408 | 24  |               |          | 54.81          | 317        |       | YTASK               |                     |

Table S24. Genetic and molecular data of the vertebrate SDR28C family variants. For further details see Table S15.

| Species                        | Gene symbol | Gene ID   | Chr    | Enzyme symbol | Exons n. | Phases formula | % identity | aa n.   | Structure consensus | Catalysis consensus |
|--------------------------------|-------------|-----------|--------|---------------|----------|----------------|------------|---------|---------------------|---------------------|
| <i>Homo sapiens</i>            | DHRS7B      | 25979     | 17     | SDR32C1       | 7        | 120222         | 100        | 325     | GATSGLG             | YAASK               |
| <i>Pan troglodytes</i>         |             | 454512    | 17     |               |          |                | 99.38      |         |                     |                     |
| <i>Mus musculus</i>            | Dhrs7b      | 216820    | 11     |               |          |                | 78.02      | 323     |                     | YSASK               |
| <i>Monodelphis domestica</i>   | DHRS7B      | 100017149 | 6      |               | 8        | 0120222        | 72.14      | 363     |                     | YAASK               |
| <i>Gallus gallus</i>           |             | 416499    | 14     |               | 6        | 20222          | 72.49      | 309     |                     |                     |
| <i>Anolis carolinensis</i>     | dhrs7b      | 100561191 | -      |               |          |                | 67.96      |         |                     |                     |
| <i>Xenopus tropicalis</i>      |             | 779695    | -      |               |          |                | 66.87      | 323     |                     |                     |
| <i>Danio rerio</i>             |             |           | 550454 |               |          |                | 3          |         |                     |                     |
|                                |             |           |        |               |          |                |            |         |                     |                     |
| <i>Homo sapiens</i>            | DHRS7C      | 201140    | 17     | SDR32C2       | 6        | 20222          | 100        | 312     | DAISGLG             | YAASK               |
| <i>Pan troglodytes</i>         |             | 455079    | 17     |               |          |                | 100        |         |                     |                     |
| <i>Mus musculus</i>            | Dhrs7c      | 68460     | 11     |               |          |                | 91.78      | 304     |                     |                     |
| <i>Monodelphis domestica</i>   | DHRS7C      | 100031331 | 2      |               |          |                | 89.39      | 332     |                     |                     |
| <i>Gallus gallus</i>           |             | 417304    | 18     |               |          |                | 77.17      | 311     |                     |                     |
| <i>Anolis mississippiensis</i> | dhrs7c      | 100556174 | 2      |               |          |                | 72.99      |         | DAISGVG             |                     |
| <i>Xenopus tropicalis</i>      |             | 100135266 | -      |               |          |                | 77.17      | DAISGLG |                     |                     |
| <i>Danio rerio</i>             | dhrs7cb     | 553684    | 12     |               |          |                |            |         | 56.27               |                     |

Table S25. Genetic and molecular data of the vertebrate SDR32C family variants. The asparagine (D) diagnostic amino acids of the vertebrate structure consensus are highlighted in turquoise. For further details see Table S15 and Consensuses in Online Resources 1.

| Species                | Gene symbol | Gene ID | Chr | Enzyme symbol | Exons n. | Phases formula | % identity | aa n. | Structure consensus | Catalysis consensus |
|------------------------|-------------|---------|-----|---------------|----------|----------------|------------|-------|---------------------|---------------------|
| <i>Homo sapiens</i>    | SDR42E1     | 93517   | 16  |               |          |                | 100.00     | 393   | GGSGYFG             |                     |
| <i>Pan troglodytes</i> |             | 468047  | 16  |               |          |                | 98.98      |       |                     |                     |

|                      |         |           |      |         |    |               |        |     |         |       |
|----------------------|---------|-----------|------|---------|----|---------------|--------|-----|---------|-------|
| Mus Musculus         | Sdr42e1 | 74032     | 8    | SDR42E1 | 2  | 1             | 79.64  | 394 | GGGGYFG | YSRTK |
| Sarcophilus harrisii | SDR42E1 | 100921033 | 1    |         |    |               | 72.12  | 396 |         |       |
| Gallus gallus        |         | 415806    | 11   |         |    |               | 70.59  | 391 |         |       |
| Python bivittatus    |         | 103058160 | -    |         |    |               | 67.26  |     | GGSGYFG |       |
| Xenopus tropicalis   | Sdr42e1 | 100496843 | 4    |         |    |               | 59.49  |     | GGGGYFG |       |
| Lepisosteus oculatus |         | 102689558 | LG23 |         |    |               | 65.46  | 390 |         |       |
|                      |         |           |      |         |    |               |        |     |         |       |
| Homo sapiens         | SDR42E2 | 100288072 | 16   | SDR42E2 | 11 | 0020200020    | 100.00 | 626 | GGGGYLG | YSRTK |
| Pan troglodytes      |         | 100615511 | 16   |         |    |               | 97.84  | 602 |         |       |
| Mus musculus         | Gm5737  | 436008    | 7    |         |    |               | 75.41  | 608 |         |       |
| Sarcophilus harrisii | SD43E2  | 100916789 | 2    |         |    |               | 58.76  | 540 | GGGGYFG |       |
| Gallus gallus        |         | 416618    | 14   |         |    |               | 53.59  | 454 |         |       |
| Python bivittatus    |         | 103065881 | -    |         | 14 | 0020200020211 | 51.96  | 541 | GGAGYFG |       |
| Xenopus tropicalis   | sdr42e2 | 101731274 | 9    |         | 11 | 0020200020    | 52.15  | 451 | GGGGYVG | YSRSK |
| Lepisosteus oculatus |         | 102689689 | LG13 |         | 11 | 10020200020   | 55.70  | 470 | GGAGYFG | YSKTK |

Table S26a. Genetic and molecular data of the vertebrate SDR42E family variants. For further details see Table S15.

| Variants | Species               | % Identity | Variants | Species               | % Identity |
|----------|-----------------------|------------|----------|-----------------------|------------|
| SDR42E1  | <i>H. sapiens</i>     | 100.00     | SDR42E2  | <i>H. sapiens</i>     | 100.00     |
|          | <i>P. troglodytes</i> | 98.98      |          | <i>P. troglodytes</i> | 97.84      |
|          | <i>M. musculus</i>    | 79.64      |          | <i>M. musculus</i>    | 75.41      |
|          | <i>S. harrisii</i>    | 72.12      |          | <i>S. harrisii</i>    | 58.76      |
|          | <i>G. gallus</i>      | 70.59      |          | <i>G. gallus</i>      | 53.39      |
|          | <i>P. bivittatus</i>  | 67.26      |          | <i>P. bivittatus</i>  | 51.84      |
|          | <i>X. tropicalis</i>  | 59.49      |          | <i>X. tropicalis</i>  | 53.21      |
|          | <i>L. oculatus</i>    | 65.46      |          | <i>L. oculatus</i>    | 55.70      |
| SDR42E2  | <i>H. sapiens</i>     | 48.81      | SDR42E1  | <i>H. sapiens</i>     | 48.81      |
|          | <i>P. troglodytes</i> | 48.81      |          | <i>P. troglodytes</i> | 48.81      |
|          | <i>M. musculus</i>    | 48.01      |          | <i>M. musculus</i>    | 46.42      |
|          | <i>S. harrisii</i>    | 48.42      |          | <i>S. harrisii</i>    | 45.93      |
|          | <i>G. gallus</i>      | 47.35      |          | <i>G. gallus</i>      | 46.15      |
|          | <i>P. bivittatus</i>  | 46.05      |          | <i>P. bivittatus</i>  | 45.89      |

|  |                      |       |  |                      |       |
|--|----------------------|-------|--|----------------------|-------|
|  | <i>X. tropicalis</i> | 45.91 |  | <i>X. tropicalis</i> | 45.21 |
|  | <i>L. oculatus</i>   | 46.77 |  | <i>L. oculatus</i>   | 46.03 |

Table S26b. Percent identity of the vertebrate SDR42E1 and SDR42E2 variants.
